# Supplementary material for: Hoxa9 and Meis1 Cooperatively Induce Addiction to Syk Signaling by Suppressing miR-146a in Acute Myeloid Leukemia
Source: Cancer Cell. 2017 Apr 10;31(4):549–562.e11. doi: 10.1016/j.ccell.2017.03.001 (PMC5389883; doi:10.1016/j.ccell.2017.03.001)
Supplement: Table S1. Proteome and Phosphoproteome of H and H/M Cells, Related to Figures 1 and 2 [file mmc2.xlsx]

## Sheet: GPome
Ragulation	Ratio H/L normalized GP (Log2)	Amino acid	Charge	Diagnostic peak	Multiplicity	Motifs	Known site	Origin	Regulatory site	Regulatory site function	Regulatory site process	Regulatory site protInteract	Regulatory site otherInteract	Regulatory site notes	Localization prob	PEP	Score	Delta score	Score for localization	Mass error [ppm]	Intensity (Log10)	Intensity L	Intensity H	Position	Intensity pY	Intensity GP	Proteins	Positions within proteins	Leading proteins	Protein	Protein names	Gene names	Sequence window	PhosphoSitePlus window	PhosphoSitePlus kinase
+	-5.7023	T	2		___1	Casein kinase I substrate motif;Casein kinase II substrate motif									1	0.0704433	50.354	30.573	50.354	-2.3148	7.54022	33128000	1563100	21	NaN	7.54022	D3Z359;Q9Z2W1	21;21	D3Z359	D3Z359	Serine/threonine-protein kinase 25	Stk25	GFAHQHSRVDPEELFTKLDRIGKGSFGEVYK
+	-4.24901	T	2		___2	PKA kinase substrate motif;PKC kinase substrate motif									1	0.0457035	44.425	19.96	42.718	1.4239	8.05706	107420000	6622900	970	NaN	8.05706	P97789-2;P97789;F8VQ87;P97789-3	970;970;970;970	P97789-2	P97789-2	5'-3' exoribonuclease 1	Xrn1	LNLKFNKKNEEVPGYTKKVGNEWMYSSAAEQ
+	-4.24901	Y	2		___2	Src kinase substrate motif									1	0.0457035	44.425	19.96	42.718	1.4239	8.05706	107420000	6622900	969	NaN	8.05706	P97789-2;P97789;F8VQ87;P97789-3	969;969;969;969	P97789-2	P97789-2	5'-3' exoribonuclease 1	Xrn1	GLNLKFNKKNEEVPGYTKKVGNEWMYSSAAE
+	-3.68815	S	2		___1	14-3-3 domain binding motif;Calmodulin-dependent protein kinase II substrate motif;Calmodulin-dependent protein kinase IV substrate motif;Chk1 kinase substrate motif;ERK1,2 kinase substrate motif;GSK-3, ERK1, ERK2, CDK5 substrate motif;MAPKAPK2 kinase substrate motif;PKA kinase substrate motif;PKC epsilon kinase substrate motif;PKC kinase substrate motif;WW domain binding motif	+	CST;HTP							1	8.21703e-07	103.39	88.403	103.39	0.17851	9.03981	983430000	112540000	431	NaN	9.03981	P42128	431	P42128	P42128	Forkhead box protein K1	Foxk1	RSSGLQTPECLSREGSPIPHDPDLGSKLASV	ECLsREGsPIPHDPD	mTOR
+	-3.40369	T	2		___1	Casein kinase II substrate motif;G protein-coupled receptor kinase 1 substrate motif;MDC1 BRCT domain binding motif;Plk1 PBD domain binding motif									0.943892	0.0135888	53.237	12.296	53.237	-0.014601	7.51904	26753000	6287200	278	NaN	7.51904	Q3U133	278	Q3U133	Q3U133	Zinc finger protein 746	Znf746	SACSDGTLKLNTAASTEADVKIVIKTEVQEE
+	-3.35968	S	3		___1	Casein kinase I substrate motif;ERK1,2 kinase substrate motif;GSK-3, ERK1, ERK2, CDK5 substrate motif;WW domain binding motif	+	HTP							0.929874	1.42787e-06	63.796	55.332	63.796	-1.7147	8.87977	691010000	67167000	717	NaN	8.87977	Q7TSH6;Q6PFF0	717;721	Q7TSH6	Q7TSH6		Scaf4	VAQNGGAETSHTEPVSPIPKPVPVPVPPIPV	TSHTEPVsPIPKPVP
+	-3.28405	S	3		___1	Cdc2 kinase substrate motif;CDK kinase substrate motif;CDK1,2,4,6 kinase substrate motif;ERK1,2 kinase substrate motif;GSK-3, ERK1, ERK2, CDK5 substrate motif;WW domain binding motif	+	HTP							1	1.10616e-08	115.2	105.75	41.207	-0.08808	7.97211	73657000	20123000	253	NaN	7.97211	Q9R1Q6	253	Q9R1Q6	Q9R1Q6	Transmembrane protein 176B	Tmem176b	EESERKLLDGHPAPASPAKEKIPAIL_____	DGHPAPAsPAkEkIP
+	-2.96184	S	2		___1	Cdc2 kinase substrate motif;CDK kinase substrate motif;CDK1,2,4,6 kinase substrate motif;ERK1,2 kinase substrate motif;G protein-coupled receptor kinase 1 substrate motif;Growth associated histone HI kinase substrate motif;GSK-3, ERK1, ERK2, CDK5 substrate motif;MAPKAPK2 kinase substrate motif;MDC1 BRCT domain binding motif;Plk1 PBD domain binding motif;WW domain binding motif									0.825955	0.0200007	57.095	45.374	47.31	2.5125	7.44872	26792000	1309300	460	NaN	7.44872	Q9QYB2-2;Q9QYB2	460;512	Q9QYB2-2	Q9QYB2-2	Dachshund homolog 1	Dach1	PGSHPSSHRSSSVSSSPARTESSSDRIPVHQ
+	-2.94497	S	2		___1	Casein kinase II substrate motif;Cdc2 kinase substrate motif;CDK kinase substrate motif;CDK1,2,4,6 kinase substrate motif;ERK1,2 kinase substrate motif;GSK-3, ERK1, ERK2, CDK5 substrate motif;WW domain binding motif	+	HTP							0.816454	4.18906e-24	156.96	147.45	115.56	-0.3966	7.88768	63280000	13931000	59	NaN	7.88768	Q8R411	59	Q8R411	Q8R411	Myc target protein 1	Myct1	FLSRRRRASAPISQWSPTRRPRSSYNHGLNR	SAPISQWsPTRRPRs
+	-2.86334	S	2		___1	Casein kinase II substrate motif	+	HTP							1	2.10448e-08	112.58	88.102	106.39	-1.2007	7.98937	60765000	36816000	1185	NaN	7.98937	Q7M739;F6ZDS4	1185;1259	Q7M739	Q7M739	Nucleoprotein TPR	Tpr	VVTSMKDAVQAPLNVSLNEEGKSQEQILEIL	VQAPLNVsLNEEGKS
+	-2.79837	S	3		___1	Casein kinase II substrate motif;G protein-coupled receptor kinase 1 substrate motif;GSK3 kinase substrate motif;PKA kinase substrate motif;Pyruvate dehydrogenase kinase substrate motif	+	HTP							0.838042	1.2942e-55	171.05	167.41	131.5	0.16722	7.93446	67172000	18820000	203	NaN	7.93446	O35601;O35601-2	203;203	O35601	O35601	FYN-binding protein	Fyb	KPRFPRHTFGQKPSLSTEDSQEENTSKNVPV	FGQKPsLstEDSQEE
+	-2.72099	S	2		___2	b-Adrenergic Receptor kinase substrate motif;Casein kinase II substrate motif;ERK1,2 kinase substrate motif;G protein-coupled receptor kinase 1 substrate motif;GSK-3, ERK1, ERK2, CDK5 substrate motif;WW domain binding motif	+	HTP							0.99883	0.0113855	43.696	32.495	42.123	4.4092	6.96481	7373500	1848200	432	NaN	6.96481	Q9QYB2-2;Q9QYB2	432;484	Q9QYB2-2	Q9QYB2-2	Dachshund homolog 1	Dach1	PSRVETSVIKERVPDSPSPAPSLEEGRRPGS	IKERVPDsPsPAPsL
+	-2.72099	S	2		___2	Casein kinase I substrate motif;DNA dependent Protein kinase substrate motif;ERK1,2 kinase substrate motif;G protein-coupled receptor kinase 1 substrate motif;GSK3 kinase substrate motif;GSK-3, ERK1, ERK2, CDK5 substrate motif;WW domain binding motif	+	HTP							0.979862	0.0113855	43.696	32.495	42.123	4.4092	6.96481	7373500	1848200	434	NaN	6.96481	Q9QYB2-2;Q9QYB2	434;486	Q9QYB2-2	Q9QYB2-2	Dachshund homolog 1	Dach1	RVETSVIKERVPDSPSPAPSLEEGRRPGSHP	ERVPDsPsPAPsLEE
+	-2.69703	S	2		___1	Casein kinase II substrate motif;ERK1,2 kinase substrate motif;GSK-3, ERK1, ERK2, CDK5 substrate motif;Pyruvate dehydrogenase kinase substrate motif;WW domain binding motif									0.957029	0.00374728	77.204	69.826	77.204	0.028751	8.2306	138720000	31346000	17	NaN	8.2306	Q8BMK4	17	Q8BMK4	Q8BMK4	Cytoskeleton-associated protein 4	Ckap4	PSAKQRGSKGGHGAASPSDKGAHPSGGADDV
+	-2.58493	S	2		___1	b-Adrenergic Receptor kinase substrate motif;Casein kinase II substrate motif;Cdc2 kinase substrate motif;CDK kinase substrate motif;CDK1,2,4,6 kinase substrate motif;ERK1,2 kinase substrate motif;GSK-3, ERK1, ERK2, CDK5 substrate motif;WW domain binding motif	+	HTP							0.969599	1.93026e-34	166.48	143.49	166.48	1.2677	7.76562	48882000	9411700	281	NaN	7.76562	Q8K1J5	281	Q8K1J5	Q8K1J5	Protein SDE2 homolog	Sde2	RPGSPRSSASGTHSESPEKLQCPVTEPGQGI	ASGTHSEsPEKLQCP
+	-2.55038	S	2		___1	Casein kinase II substrate motif;Cdc2 kinase substrate motif;CDK kinase substrate motif;CDK1,2,4,6 kinase substrate motif;ERK1,2 kinase substrate motif;G protein-coupled receptor kinase 1 substrate motif;GSK3 kinase substrate motif;GSK-3, ERK1, ERK2, CDK5 substrate motif;WW domain binding motif	+	HTP							0.75863	0.00604856	62.589	47.825	62.589	0.77726	7.88843	54433000	22912000	116	NaN	7.88843	Q7TSH3	116	Q7TSH3	Q7TSH3	Zinc finger protein 516	Znf516	QLGEMRVSEGLDGCASPTKSTSACNRVLNGA	EGLDGCAsPtKsTSA
+	-2.5098	T	2		___2	Calmodulin-dependent protein kinase II substrate motif;G protein-coupled receptor kinase 1 substrate motif;GSK-3, ERK1, ERK2, CDK5 substrate motif;MAPKAPK2 kinase substrate motif;MDC1 BRCT domain binding motif;PKC kinase substrate motif;Plk1 PBD domain binding motif;WW domain binding motif	+	CST;HTP							0.877435	8.67e-10	103.71	77.882	59.539	-0.99971	7.31129	15612000	4866100	159	NaN	7.31129	Q61033-2;Q61029-4;Q61029-2;Q61029-3;Q61029;Q61033	159;159;159;159;159;159	Q61033-2	Q61033-2	Lamina-associated polypeptide 2, isoforms alpha/zeta;Lamina-associated polypeptide 2, isoforms beta/delta/epsilon/gamma	Tmpo	KLLKLREQGTESRSSTPLPTVSSSAENTRQN	GtEsRsstPLPtVss
+	-2.37789	S	2		___1	Casein kinase II substrate motif;G protein-coupled receptor kinase 1 substrate motif;MDC1 BRCT domain binding motif;Plk1 PBD domain binding motif;Pyruvate dehydrogenase kinase substrate motif	+	HTP							0.955496	6.60693e-06	88.872	74.307	88.872	0.28381	8.51503	287490000	39870000	83	NaN	8.51503	O70251	83	O70251	O70251	Elongation factor 1-beta	Eef1b	SLPGVKKSLGKYGPSSVEDTTGSGAADAKDD	LGkyGPssVEDttGs
+	-2.36305	S	2		___1	b-Adrenergic Receptor kinase substrate motif;Cdc2 kinase substrate motif;CDK kinase substrate motif;CDK1,2,4,6 kinase substrate motif;ERK1,2 kinase substrate motif;Growth associated histone HI kinase substrate motif;GSK-3, ERK1, ERK2, CDK5 substrate motif;PKA kinase substrate motif;PKC kinase substrate motif;WW domain binding motif									1	0.00527151	69.578	52.909	69.578	-0.43967	7.79061	54177000	7569200	315	NaN	7.79061	D3YXV8;Q8CBY3;D3YWS8	315;352;352	D3YXV8	D3YXV8	Leukocyte receptor cluster member 8 homolog	Leng8	SREPLPGLTREPVAESPKKKRWEAPSSLHPS
+	-2.36112	S	3		___1	ERK1,2 kinase substrate motif;GSK-3, ERK1, ERK2, CDK5 substrate motif;PKA kinase substrate motif;PKC kinase substrate motif;WW domain binding motif	+	HTP							1	0.00450458	52.97	49.635	52.52	-0.16722	7.37979	9918600	14058000	593	NaN	7.37979	E9PWW9;E9Q4Y2	593;608	E9PWW9	E9PWW9		Rsf1	EKAKKTSIDKDIQKLSPIPEEVVRGALESEK	DKDIQKLsPIPEEVV
+	-2.35698	S	3		___1	ATM kinase substrate motif;Casein kinase II substrate motif;DNA dependent Protein kinase substrate motif;Pyruvate dehydrogenase kinase substrate motif	+	CST;HTP							1	7.7009e-06	93.243	84.53	69.721	-1.1407	8.16403	73250000	72645000	1117	NaN	8.16403	J3QP81;E9Q6L0;E9QNY9;E9QKH0;Q80TV8-2;Q80TV8	1117;1126;1184;1194;1183;1193	J3QP81	J3QP81	CLIP-associating protein 1	Clasp1	SLRGVTEAIEKFSFRSQEDLNEPIKRDGKKD	IEkFSFRsQEDLNEP
+	-2.20377	S	2		___1	ERK1,2 kinase substrate motif;G protein-coupled receptor kinase 1 substrate motif;GSK-3, ERK1, ERK2, CDK5 substrate motif;WW domain binding motif	+	CST;HTP							0.920399	0.000225549	50.87	50.87	43.349	0.53298	7.71576	32572000	19399000	273	NaN	7.71576	O08539-2;Q6P1B9;O08539	273;273;304	O08539-2	O08539-2	Myc box-dependent-interacting protein 1	Bin1	APEKGNKSPSPPPDGSPAATPEIRVNHEPEP	PsPPPDGsPAAtPEI
+	-2.20018	S	2		___1	ERK1,2 kinase substrate motif;G protein-coupled receptor kinase 1 substrate motif;GSK-3, ERK1, ERK2, CDK5 substrate motif;PKA kinase substrate motif;WW domain binding motif	+	HTP							0.849524	0.00148034	80.507	57.653	69.878	-2.4568	8.4814	194640000	108330000	690	NaN	8.4814	B1AXH1;E9Q0V6	690;1055	B1AXH1	B1AXH1	NHS-like protein 2	Nhsl2	PSTGDDQKSPGKGVTSPLHTDTEKEAISPGR	sPGKGVTsPLHTDTE
+	-2.17208	S	2		___1	Casein kinase I substrate motif;ERK1,2 kinase substrate motif;GSK-3, ERK1, ERK2, CDK5 substrate motif;WW domain binding motif	+	HTP							0.961478	0.0164398	44.564	35.982	44.564	0.61512	7.52906	25671000	8140200	621	NaN	7.52906	Q7TPM1;F8WHT3;F7AYW2	621;621;549	Q7TPM1	Q7TPM1	Protein PRRC2B	Prrc2b	SSSSSSIEEEVRESGSPAQEFSKYQKSLPPR	EEVRESGsPAQEFSK
+	-2.12595	S	3		___2	14-3-3 domain binding motif;AMP-activated protein kinase substrate motif;Calmodulin-dependent protein kinase II substrate motif;DNA dependent Protein kinase substrate motif;ERK1,2 kinase substrate motif;GSK-3, ERK1, ERK2, CDK5 substrate motif;HMGCoA Reductase kinase substrate motif;PKA kinase substrate motif;PKC kinase substrate motif;WW domain binding motif									1	4.46034e-29	134.11	124.54	126.98	0.012604	9.12723	809800000	530550000	162	NaN	9.12723	A2A6J7;A2A6J4	162;160	A2A6J7	A2A6J7		Lsp1	DAVGGSGEAEEVRTPSPLALEDTVELSSPPL
+	-2.12595	S	3		___2	14-3-3 domain binding motif;AMP-activated protein kinase substrate motif;Calmodulin-dependent protein kinase II substrate motif;DNA dependent Protein kinase substrate motif;ERK1,2 kinase substrate motif;GSK-3, ERK1, ERK2, CDK5 substrate motif;HMGCoA Reductase kinase substrate motif;PKA kinase substrate motif;PKC kinase substrate motif;WW domain binding motif	+	CST;HTP							1	4.46034e-29	134.11	124.54	126.98	0.012604	9.1125	781420000	514260000	168	NaN	9.1125	P19973;P19973-2	168;166	P19973	P19973	Lymphocyte-specific protein 1	Lsp1	GEAEEHLIRHQVRTPSPLALEDTVELSSPPL	RHQVRtPsPLALEDt
+	-2.11223	T	3		___1	ERK1,2 kinase substrate motif;GSK3, Erk1, Erk2 and CDK5 kinase motif;GSK-3, ERK1, ERK2, CDK5 substrate motif;WW domain binding motif	+	CST;HTP							0.979337	1.37733e-50	163.32	155.01	113.29	0.39645	8.6383	295890000	138920000	104	NaN	8.6383	Q9CWK8	104	Q9CWK8	Q9CWK8	Sorting nexin-2	Snx2	ELILSSEPSPAVTPVTPTTLIAPRIESKSIS	sPAVtPVtPttLIAP	ERK2
+	-2.10123	S	2		___1	14-3-3 domain binding motif;Calmodulin-dependent protein kinase II substrate motif;Phosphorylase kinase substrate motif;PKA kinase substrate motif;PKC kinase substrate motif;ZIP kinase substrate motif	+	CST;HTP							0.999984	0.00277026	96.665	29.703	67.704	-0.18628	8.61397	271440000	139680000	775	NaN	8.61397	P12382	775	P12382	P12382	6-phosphofructokinase, liver type	Pfkl	DYVSGELEHVTRRTLSIDKGF__________	HVTRRtLsIDKGF__
+	-2.084	S	3		___2	14-3-3 domain binding motif;14-3-3 domain binding motif;Calmodulin-dependent protein kinase II substrate motif;Calmodulin-dependent protein kinase II substrate motif;Calmodulin-dependent protein kinase IV substrate motif;Casein kinase II substrate motif;Casein kinase II substrate motif;Chk1 kinase substrate motif;ERK1,2 kinase substrate motif;ERK1,2 kinase substrate motif;Growth associated histon…	+	CST;HTP							0.99873	0.0134399	43.592	35.679	40.857	-0.36733	7.37522	14741000	8984400	264	NaN	7.37522	Q6PFR5;E9QP00;P62996;F8WJG3	259;260;264;164	Q6PFR5;P62996	P62996	Transformer-2 protein homolog alpha;Transformer-2 protein homolog beta	Tra2a;Tra2b	DRGYDRYEDYDYRRRSPSPYYSRYRSRSRSR;GWRAAQDRDQIYRRRSPSPYYSRGGYRSRSR	DYDYRRRsPsPyysR;DQIyRRRsPsPyysR
+	-2.084	S	3		___2	14-3-3 domain binding motif;14-3-3 domain binding motif;Akt kinase substrate motif;Akt kinase substrate motif;Calmodulin-dependent protein kinase II substrate motif;Calmodulin-dependent protein kinase II substrate motif;Casein kinase II substrate motif;Casein kinase II substrate motif;DNA dependent Protein kinase substrate motif;DNA dependent Protein kinase substrate motif;ERK1,2 kinase substrate…	+	CST;HTP							0.983961	0.0134399	43.592	35.679	40.857	-0.36733	7.37522	14741000	8984400	266	NaN	7.37522	Q6PFR5;E9QP00;P62996;F8WJG3	261;262;266;166	Q6PFR5;P62996	P62996	Transformer-2 protein homolog alpha;Transformer-2 protein homolog beta	Tra2a;Tra2b	GYDRYEDYDYRRRSPSPYYSRYRSRSRSRSY;RAAQDRDQIYRRRSPSPYYSRGGYRSRSRSR	DYRRRsPsPyysRYR;IyRRRsPsPyysRGG
+	-2.06764	S	2		___2	b-Adrenergic Receptor kinase substrate motif;Casein kinase II substrate motif	+	HTP							0.808827	6.22733e-06	84.68	73.871	84.68	0.42285	7.38634	11865000	12476000	78	NaN	7.38634	Q9EPR4-2;Q9EPR4	78;78	Q9EPR4-2	Q9EPR4-2	Solute carrier family 23 member 2	Slc23a2	ENGIAEKSSLAETLDSTGSLDPQRSDMIYTI	sLAEtLDstGsLDPQ
+	-2.03434	S	2		___1	Casein kinase II substrate motif;ERK1,2 kinase substrate motif;GSK-3, ERK1, ERK2, CDK5 substrate motif;PKA kinase substrate motif;PKC kinase substrate motif;WW domain binding motif	+	HTP							0.979319	0.0139425	66.289	46.053	66.289	1.1989	7.33453	12564000	9039800	699	NaN	7.33453	A2AGH8;A2AGH6-2;A2AGH9;A2AGH6	699;699;699;699	A2AGH8	A2AGH8	Mediator of RNA polymerase II transcription subunit 12	Med12	DFSLFSPTMPCEGKGSPSPEKPDVEKEVKPP	MPCEGKGsPsPEKPD
+	-1.9775	S	2		___1	ERK1,2 kinase substrate motif;GSK-3, ERK1, ERK2, CDK5 substrate motif;MAPKAPK2 kinase substrate motif;WW domain binding motif	+	HTP							0.98539	0.000647438	61.087	54.971	61.087	1.4294	7.13868	8233200	5528700	267	NaN	7.13868	Q9QXG4;A2AQN5;A2AQN4;F7CU63	267;267;267;129	Q9QXG4	Q9QXG4	Acetyl-coenzyme A synthetase, cytoplasmic	Acss2	HLGRAELGMNDSPSQSPPVKRPCPDVQICWN	MNDsPsQsPPVkRPC;MNDsPSQsPPVKRPC
+	-1.93898	S	2		___2	Casein kinase I substrate motif;ERK1,2 kinase substrate motif;G protein-coupled receptor kinase 1 substrate motif;GSK3 kinase substrate motif;GSK-3, ERK1, ERK2, CDK5 substrate motif;MDC1 BRCT domain binding motif;Plk1 PBD domain binding motif;WW domain binding motif									0.960257	1.95272e-41	157.01	139.39	86.359	0.23424	9.13631	844370000	524330000	174	NaN	9.13631	A2A6J7;A2A6J4	174;172	A2A6J7	A2A6J7		Lsp1	RTPSPLALEDTVELSSPPLSPTTKLADRTES
+	-1.93898	S	2		___2	Casein kinase I substrate motif;ERK1,2 kinase substrate motif;G protein-coupled receptor kinase 1 substrate motif;GSK3 kinase substrate motif;GSK-3, ERK1, ERK2, CDK5 substrate motif;MDC1 BRCT domain binding motif;Plk1 PBD domain binding motif;WW domain binding motif	+	HTP							0.960257	1.95272e-41	157.01	139.39	86.359	0.23424	9.12189	815980000	508030000	180	NaN	9.12189	P19973;P19973-2	180;178	P19973	P19973	Lymphocyte-specific protein 1	Lsp1	RTPSPLALEDTVELSSPPLSPTTKLADRTES	EDtVELssPPLsPtt
+	-1.93093	S	2		___1	b-Adrenergic Receptor kinase substrate motif;Casein kinase II substrate motif;ERK1,2 kinase substrate motif;GSK-3, ERK1, ERK2, CDK5 substrate motif;WW domain binding motif	+	HTP							0.999957	1.98917e-26	150.69	134.7	108.45	1.3273	8.29691	139010000	59101000	748	NaN	8.29691	Q68FE6	748	Q68FE6	Q68FE6	Protein FAM65A	Fam65a	LASSGSKPLTSPAPDSPEQIPKSPSSSPSSS	LTSPAPDsPEQIPKS
+	-1.87477	S	3		___1	AMP-activated protein kinase substrate motif;Calmodulin-dependent protein kinase II substrate motif;Casein kinase II substrate motif;Chk1 kinase substrate motif;DNA dependent Protein kinase substrate motif;PKA kinase substrate motif;PKC kinase substrate motif	+	HTP							0.873299	4.90611e-05	91.457	75.817	91.457	-0.21764	8.04159	76605000	33447000	252	NaN	8.04159	Q8CDA1-3;Q8CDA1-2;Q8CDA1	252;316;943	Q8CDA1-3	Q8CDA1-3	Phosphatidylinositide phosphatase SAC2	Inpp5f	SELGKGLESPLKKSPSADSIHTRTGFTKPMD	sPLKKsPsADsIHTR
+	-1.86696	S	3		___1	14-3-3 domain binding motif;b-Adrenergic Receptor kinase substrate motif;Calmodulin-dependent protein kinase II substrate motif;Phosphorylase kinase substrate motif;PKA kinase substrate motif;PKC epsilon kinase substrate motif;PKC kinase substrate motif	+	HTP							1	0.00118633	46.461	46.461	46.461	0.5456	6.89169	5280200	2512600	679	NaN	6.89169	Q8K4I3;F6WMJ3;A2AFJ8	679;703;391	Q8K4I3	Q8K4I3	Rho guanine nucleotide exchange factor 6	Arhgef6	AYCTSASFQQGTRKDSVPQVLLPEEEKLIIE	QQGTRKDsVPQVLLP
+	-1.86486	S	3		___1	ERK1,2 kinase substrate motif;G protein-coupled receptor kinase 1 substrate motif;GSK-3, ERK1, ERK2, CDK5 substrate motif;PKA kinase substrate motif;WW domain binding motif	+	HTP							0.937505	0.00150452	46.282	27.459	46.282	1.6533	7.42888	18082000	8764100	685	NaN	7.42888	E0CZF8;E0CZD7;P83510-2;E0CXD6;E0CY98;P83510;E9PUL9;B9EKN8;B2RQ80	685;685;740;714;714;740;740;769;769	E0CZF8	E0CZF8	Traf2 and NCK-interacting protein kinase	Tnik	SSERSRVRANSKSEGSPVLPHEPSKVKPEES	ANsKsEGsPVLPHEP
+	-1.8414	Y	2	+	___1	ALK kinase substrate motif;Src kinase substrate motif	+	CST;HTP;LTP							1	9.45976e-43	196.48	196.48	50.09	0.27918	8.73848	489010000	58612000	41	8.7321	6.90202	Q8BH99;Q99M51	41;105	Q8BH99	Q8BH99	Cytoplasmic protein NCK1	Nck1	ASPADDSFVDPGERLYDLNMPAFVKFNYMAE	VDPGERLyDLNMPAF
+	-1.82951	S	3		___3										0.798691	7.64107e-29	132.61	129.92	114.13	0.83683	8.74933	330420000	231050000	173	NaN	8.74933	A2A6J7;A2A6J4	173;171	A2A6J7	A2A6J7		Lsp1	VRTPSPLALEDTVELSSPPLSPTTKLADRTE
+	-1.82951	S	3		___3		+	HTP							0.798691	7.64107e-29	132.61	129.92	114.13	0.83683	8.74933	330420000	231050000	179	NaN	8.74933	P19973;P19973-2	179;177	P19973	P19973	Lymphocyte-specific protein 1	Lsp1	VRTPSPLALEDTVELSSPPLSPTTKLADRTE	LEDtVELssPPLsPt
+	-1.82864	S	2		___3	ATM kinase substrate motif;Casein kinase II substrate motif;DNA dependent Protein kinase substrate motif;G protein-coupled receptor kinase 1 substrate motif;GSK3 kinase substrate motif	+	HTP							0.998141	0.0170944	44.998	36.866	44.998	-0.72304	6.59491	2943700	990980	999	NaN	6.59491	Q6GYP7-4;Q6GYP7;Q6GYP7-2;Q6GYP7-6	999;999;999;444	Q6GYP7-4	Q6GYP7-4	Ral GTPase-activating protein subunit alpha-1	Ralgapa1	GSESASPVHSALGSRSQTPSPSTLSRAHIEQ	HSALGSRsQtPsPST
+	-1.82864	T	2		___3	Calmodulin-dependent protein kinase II substrate motif;G protein-coupled receptor kinase 1 substrate motif;GSK-3, ERK1, ERK2, CDK5 substrate motif;MAPKAPK2 kinase substrate motif;PKC kinase substrate motif;WW domain binding motif	+	HTP							0.998186	0.0170944	44.998	36.866	44.998	-0.72304	6.59491	2943700	990980	1001	NaN	6.59491	Q6GYP7-4;Q6GYP7;Q6GYP7-2;Q6GYP7-6	1001;1001;1001;446	Q6GYP7-4	Q6GYP7-4	Ral GTPase-activating protein subunit alpha-1	Ralgapa1	ESASPVHSALGSRSQTPSPSTLSRAHIEQKD	ALGSRsQtPsPSTLS
+	-1.82772	S	2		___1	Casein kinase II substrate motif;G protein-coupled receptor kinase 1 substrate motif;GSK3 kinase substrate motif	+	CST;HTP							0.801605	0.00131752	58.814	51.91	54.281	-3.1633	7.04305	7214400	3827500	11	NaN	7.04305	Q8VED2	11	Q8VED2	Q8VED2	Biogenesis of lysosome-related organelles complex 1 subunit 4	Bloc1s4	_____MEEGPAVGTLSREVSTEEAEPLGAAW	GPAVGTLsREVsTEE
+	-1.82598	S	2		___1	ERK1,2 kinase substrate motif;G protein-coupled receptor kinase 1 substrate motif;Growth associated histone HI kinase substrate motif;GSK3 kinase substrate motif;GSK-3, ERK1, ERK2, CDK5 substrate motif;WW domain binding motif	+	CST;HTP							0.999999	0.00992623	72.434	56.296	72.434	0.80005	7.86214	44202000	28600000	445	NaN	7.86214	Q03173-6;Q03173-3;Q03173-4;E9QKR1;Q03173-5;J3QNM3;E9QKQ9;Q03173;E9QLZ9;Q03173-2	445;479;721;723;725;727;727;740;742;328	Q03173-6	Q03173-6	Protein enabled homolog	Enah	TRKPWERTNTMNGSKSPVISRPKSTPSSQPS	NtMNGsKsPVIsRPK
+	-1.82598	S	2		___1	b-Adrenergic Receptor kinase substrate motif;Casein kinase I substrate motif;PKA kinase substrate motif;PKC kinase substrate motif	+	CST;HTP							1	2.12031e-49	195.89	195.89	195.89	-0.014207	8.74269	443590000	109370000	561	8.71878	7.47172	O35601;O35601-2	561;561	O35601	O35601	FYN-binding protein	Fyb	SYGYIKTTAVEIDYDSLKRKKNSLNAVPPRL	AVEIDyDsLKRKKNs
+	-1.82286	S	2		___1	ERK1,2 kinase substrate motif;G protein-coupled receptor kinase 1 substrate motif;GSK-3, ERK1, ERK2, CDK5 substrate motif;WW domain binding motif	+	CST;HTP							0.899363	0.0181011	46.88	46.88	46.88	-0.33049	6.88911	5140100	2606600	596	NaN	6.88911	E0CZF8;E0CZD7;P83510-2;E0CXD6;E0CY98;P83510;E9PUL9;B9EKN8;B2RQ80	596;596;651;625;625;651;651;680;680	E0CZF8	E0CZF8	Traf2 and NCK-interacting protein kinase	Tnik	EEDIPPKVPQRTTSISPALARKNSPGNGSAL	PQRTTsIsPALARKN
+	-1.80405	S	2		___1	ERK1,2 kinase substrate motif;G protein-coupled receptor kinase 1 substrate motif;Growth associated histone HI kinase substrate motif;GSK-3, ERK1, ERK2, CDK5 substrate motif;PKA kinase substrate motif;PKC kinase substrate motif;WW domain binding motif	+	HTP							1	0.0150814	96.143	65.579	96.143	-0.55898	8.00035	73102000	26979000	442	NaN	8.00035	Q8BLR5	442	Q8BLR5	Q8BLR5	PH and SEC7 domain-containing protein 4	Psd4	SPVSSQDSSPRVLLHSPKWPQDASHLLQKDR	sPRVLLHsPKWPQDA
+	-1.804	S	2		___1	14-3-3 domain binding motif;Calmodulin-dependent protein kinase II substrate motif;Calmodulin-dependent protein kinase IV substrate motif;Chk1 kinase substrate motif;PKA kinase substrate motif;PKC kinase substrate motif	+	HTP							1	0.0180189	62.271	43.015	47.844	-0.047497	7.96929	58709000	34465000	284	NaN	7.96929	Q3UZ39;Q3UZ39-3	284;46	Q3UZ39	Q3UZ39	Leucine-rich repeat flightless-interacting protein 1	Lrrfip1	QPKPNTGKDCVDRGVSHPGEKAENQRPAEDS	DCVDRGVsHPGEKAE
+	-1.79131	S	2		___1	14-3-3 domain binding motif;Calmodulin-dependent protein kinase II substrate motif;Calmodulin-dependent protein kinase IV substrate motif;Casein kinase II substrate motif;Chk1 kinase substrate motif;DNA dependent Protein kinase substrate motif;G protein-coupled receptor kinase 1 substrate motif;PKA kinase substrate motif;PKC kinase substrate motif	+	CST;HTP							0.99923	1.34138e-65	187.72	180.94	187.72	0.60097	8.6496	273810000	172460000	211	NaN	8.6496	E9Q616	211	E9Q616	E9Q616		Ahnak	TDVETQPGKTVIRLPSGSGPASPTTGSAVDI	KtVIRLPsGsGPAsP
+	-1.77967	S	2		___1	BARD1 BRCT domain binding motif;Casein kinase I substrate motif;Casein kinase II substrate motif	+	CST;HTP							1	1.3104e-10	115.54	107.66	67.88	1.7718	8.26893	108280000	77467000	571	NaN	8.26893	Q922D4-2;Q922D4;G5E8R4	571;588;617	Q922D4-2	Q922D4-2	Serine/threonine-protein phosphatase 6 regulatory subunit 3	Ppp6r3	EACCKERIQQFDDGGSDEEDIWEEKHIAFTP	QQFDDGGsDEEDIWE
+	-1.77927	S	2		___2	Casein kinase II substrate motif;ERK1,2 kinase substrate motif;G protein-coupled receptor kinase 1 substrate motif;GSK-3, ERK1, ERK2, CDK5 substrate motif;MAPKAPK2 kinase substrate motif;Pyruvate dehydrogenase kinase substrate motif;WW domain binding motif	+	HTP							0.758017	0.000465	58.479	48.634	55.437	-0.032319	7.65929	31041000	14593000	269	NaN	7.65929	B1ATR2;Q6ZPJ0	269;269	B1ATR2	B1ATR2	Testis-expressed sequence 2 protein	Tex2	NTGGDSKTAPSSPLTSPSDTRSFFKVPEMEA	APssPLtsPsDTRsF
+	-1.75975	S	3		___1	b-Adrenergic Receptor kinase substrate motif;Casein kinase II substrate motif;ERK1,2 kinase substrate motif;GSK-3, ERK1, ERK2, CDK5 substrate motif;PKA kinase substrate motif;Pyruvate dehydrogenase kinase substrate motif;WW domain binding motif	+	HTP							0.987177	0.00622149	56.681	47.623	56.681	-0.093924	8.44677	151140000	128600000	453	NaN	8.44677	Q3ULL6	453	Q3ULL6	Q3ULL6		Upf3b	RSRLCPADDSIKPGDSPVDKKQESGISHRKE	DSIKPGDsPVDKKQE
+	-1.74164	S	3		___2	14-3-3 domain binding motif;Calmodulin-dependent protein kinase II substrate motif;Pim1 kinase substrate sequence;PKA kinase substrate motif;PKC epsilon kinase substrate motif;PKC kinase substrate motif	+	CST;HTP							0.750276	4.9803e-06	69.765	63.15	43.795	0.10478	8.08803	60386000	62083000	528	NaN	8.08803	Q9D6Z1;A2APD7	528;244	Q9D6Z1	Q9D6Z1	Nucleolar protein 56	Nop56	SDLEEMATSSAKRKKSSPKEEVASEPEEAAS	SsAKRKKssPKEEVA
+	-1.72814	S	3		___2	BARD1 BRCT domain binding motif;Casein kinase II substrate motif;G protein-coupled receptor kinase 1 substrate motif	+	HTP							1	1.06233e-40	172.42	165.16	89.272	-0.40973	8.34815	129540000	93373000	80	NaN	8.34815	Q9ESV0;F8WJA0	80;126	Q9ESV0	Q9ESV0	ATP-dependent RNA helicase DDX24	Ddx24	LFSSEETKKRKAQAVSEEEEEEEGQSSSPKK	KRKAQAVsEEEEEEE
+	-1.72814	S	3		___2	Cdc2 kinase substrate motif;CDK kinase substrate motif;CDK1,2,4,6 kinase substrate motif;ERK1,2 kinase substrate motif;Growth associated histone HI kinase substrate motif;GSK-3, ERK1, ERK2, CDK5 substrate motif;MDC1 BRCT domain binding motif;PKA kinase substrate motif;PKC kinase substrate motif;Plk1 PBD domain binding motif;WW domain binding motif	+	HTP							0.882377	6.68574e-11	99.859	82.181	99.859	2.1364	7.47933	14781000	15372000	92	NaN	7.47933	Q9ESV0;F8WJA0	92;138	Q9ESV0	Q9ESV0	ATP-dependent RNA helicase DDX24	Ddx24	QAVSEEEEEEEGQSSSPKKKIKLKKQRDAAR	EEEGQsssPKKKIKL
+	-1.72147	S	2		___1	14-3-3 domain binding motif;Calmodulin-dependent protein kinase II alpha substrate motif;Calmodulin-dependent protein kinase II substrate motif;Calmodulin-dependent protein kinase IV substrate motif;Casein kinase II substrate motif;Chk1 kinase substrate motif;DNA dependent Protein kinase substrate motif;G protein-coupled receptor kinase 1 substrate motif;MAPKAPK2 kinase substrate motif;Phosphoryl…	+	CST;HTP;LTP							0.99999	9.52701e-09	102.21	95.258	102.21	-0.39249	8.86179	510960000	216460000	243	NaN	8.86179	A2A6J7;A2A6J4;P19973;P19973-2	237;235;243;241	A2A6J7;P19973	P19973	Lymphocyte-specific protein 1	Lsp1	ATESSGRTPKLSRQPSIELPSMAVASTKTLW	PKLsRQPsIELPsMA	MAPKAPK2
+	-1.71302	S	2		___2	Casein kinase II substrate motif;ERK1,2 kinase substrate motif;G protein-coupled receptor kinase 1 substrate motif;GSK3 kinase substrate motif;GSK-3, ERK1, ERK2, CDK5 substrate motif;MDC1 BRCT domain binding motif;Plk1 PBD domain binding motif;WW domain binding motif	+	HTP							0.951119	0.000465	58.479	48.634	58.479	0.28918	7.65929	31041000	14593000	265	NaN	7.65929	B1ATR2;Q6ZPJ0	265;265	B1ATR2	B1ATR2	Testis-expressed sequence 2 protein	Tex2	TQPRNTGGDSKTAPSSPLTSPSDTRSFFKVP	DSKtAPssPLtsPsD
+	-1.69867	S	2		___1	MDC1 BRCT domain binding motif;Plk1 PBD domain binding motif	+	HTP							0.9543	3.93542e-18	136.63	102.2	136.63	-0.65372	7.67649	25111000	22368000	355	NaN	7.67649	H7BX32;Q8K3Z9	355;355	H7BX32	H7BX32	Nuclear envelope pore membrane protein POM 121	Pom121	VPKPGSLKRSLASQSSDDHLNKRSRTSSVSS	RSLAsQSsDDHLNKR
+	-1.66823	S	2		___2	Casein kinase II substrate motif;ERK1,2 kinase substrate motif;GSK-3, ERK1, ERK2, CDK5 substrate motif;MAPKAPK2 kinase substrate motif;MDC1 BRCT domain binding motif;Plk1 PBD domain binding motif;WW domain binding motif	+	HTP							0.92123	0.000150581	58.024	56.992	58.024	-0.19126	6.97192	5930300	3443700	400	NaN	6.97192	Q5SVL6-2;Q5SVL6	400;594	Q5SVL6-2	Q5SVL6-2	Rap1 GTPase-activating protein 2	Rap1gap2	HSSQEIKSETSSNPSSPEICPNKEKPFIKLK	EtSsNPssPEICPNK
+	-1.64919	S	3		___1	14-3-3 domain binding motif;Calmodulin-dependent protein kinase II alpha substrate motif;Calmodulin-dependent protein kinase II substrate motif;Calmodulin-dependent protein kinase IV substrate motif;Casein kinase II substrate motif;Chk1 kinase substrate motif;DNA dependent Protein kinase substrate motif;G protein-coupled receptor kinase 1 substrate motif;Phosphorylase kinase substrate motif;Pim1 …	+	CST;HTP							0.98916	1.6317e-10	87.28	75.818	85.937	1.4061	8.01115	60179000	42417000	21	NaN	8.01115	Q8BH99;Q99M51	21;85	Q8BH99	Q8BH99	Cytoplasmic protein NCK1	Nck1	IFKDFFSIGKVKRKPSVPDTASPADDSFVDP	GKVKRKPsVPDtAsP
+	-1.64304	T	2		___1	ERK1,2 kinase substrate motif;GSK3, Erk1, Erk2 and CDK5 kinase motif;GSK-3, ERK1, ERK2, CDK5 substrate motif;MAPKAPK2 kinase substrate motif;MDC1 BRCT domain binding motif;Plk1 PBD domain binding motif;WW domain binding motif	+	CST;HTP							0.852738	0.00552168	68.189	54.771	68.189	0.14828	7.45971	18755000	10066000	101	NaN	7.45971	V9GX99;Q8R0S1;Q3US59;V9GXN6;Q3TZR9	101;101;101;101;101	V9GX99	V9GX99	Cyclic AMP-dependent transcription factor ATF-7	Atf7	EKKGAAGPLDMSLPSTPDIKIKEEEPVEVDS	LDMsLPstPDIKIKE
+	-1.64102	S	2		___1	14-3-3 domain binding motif;Akt kinase substrate motif;Calmodulin-dependent protein kinase II substrate motif;ERK1,2 kinase substrate motif;GSK-3, ERK1, ERK2, CDK5 substrate motif;MAPKAPK1 kinase substrate motif;PKA kinase substrate motif;PKC kinase substrate motif;WW domain binding motif	+	CST;HTP							1	1.24192e-05	110.84	102.37	100.69	0.45474	8.69925	280590000	219730000	30	NaN	8.69925	Q9QXG4;A2AQN5;A2AQN4;D6RHA7	30;30;30;30	Q9QXG4	Q9QXG4	Acetyl-coenzyme A synthetase, cytoplasmic	Acss2	RAREETGAEGRVRGWSPPPEVRRSAHVPSLQ	EGRVRGWsPPPEVRR
+	-1.62901	S	2		___1	14-3-3 domain binding motif;Akt kinase substrate motif;Calmodulin-dependent protein kinase II substrate motif;Casein kinase II substrate motif;G protein-coupled receptor kinase 1 substrate motif;GSK3 kinase substrate motif;MAPKAPK1 kinase substrate motif;Pim1 kinase substrate sequence;PKA kinase substrate motif;PKC epsilon kinase substrate motif;PKC kinase substrate motif	+	CST;HTP							0.9323	0.000145379	96.435	64.779	96.435	0.93276	7.89656	46276000	32530000	766	NaN	7.89656	Q61687;F6RDB7	766;655	Q61687	Q61687	Transcriptional regulator ATRX	Atrx	GKTGKDDNGKRKRKNSTSGSDFDTKKGKSTE	GKRKRKNstsGsDFD
+	-1.60349	S	3		___1	Casein kinase II substrate motif;G protein-coupled receptor kinase 1 substrate motif									0.999927	4.46058e-07	65.298	60.854	65.298	-1.7247	7.46452	17649000	11494000	120	NaN	7.46452	A2AE94;A2AE95	120;120	A2AE94	A2AE94		Sytl1	SIRRKKSPKGDQALGSDGEAEAAGENTIEGE
+	-1.59588	S	2		___2	14-3-3 domain binding motif;Calmodulin-dependent protein kinase II substrate motif;Calmodulin-dependent protein kinase IV substrate motif;Casein kinase II substrate motif;Chk1 kinase substrate motif;DNA dependent Protein kinase substrate motif;G protein-coupled receptor kinase 1 substrate motif;PKA kinase substrate motif;PKC kinase substrate motif	+	CST;HTP							0.99923	1.34138e-65	187.72	180.94	187.72	0.60097	8.6496	273810000	172460000	211	NaN	8.6496	E9Q616	211	E9Q616	E9Q616		Ahnak	TDVETQPGKTVIRLPSGSGPASPTTGSAVDI	KtVIRLPsGsGPAsP
+	-1.58836	S	3		___2	PKA kinase substrate motif;PKC kinase substrate motif	+	CST;HTP							0.805259	2.63869e-24	137.72	137.72	41.475	0.82301	9.60307	1721800000	2287500000	504	NaN	9.60307	P28867;P28867-2;Q1MX43;Q1MX42;Q1MX41;Q1MX40	504;530;389;415;389;415	P28867	P28867	Protein kinase C delta type;Protein kinase C delta type regulatory subunit;Protein kinase C delta type catalytic subunit	Prkcd	DFGMCKENIFGEGRASTFCGTPDYIAPEILQ	IFGEGRAstFCGtPD
+	-1.58836	T	2		___2	Calmodulin-dependent protein kinase II substrate motif;G protein-coupled receptor kinase 1 substrate motif;MDC1 BRCT domain binding motif;PKC kinase substrate motif;Plk1 PBD domain binding motif	+	CST;HTP;LTP							0.960856	2.75531e-23	128.38	128.38	119.41	0.14614	8.63165	190200000	238000000	505	NaN	8.63165	P28867;P28867-2;Q1MX43;Q1MX42;Q1MX41;Q1MX40	505;531;390;416;390;416	P28867	P28867	Protein kinase C delta type;Protein kinase C delta type regulatory subunit;Protein kinase C delta type catalytic subunit	Prkcd	FGMCKENIFGEGRASTFCGTPDYIAPEILQG	FGEGRAstFCGtPDY
+	-1.58342	S	2		___1	14-3-3 domain binding motif;Calmodulin-dependent protein kinase II substrate motif;Casein kinase II substrate motif;G protein-coupled receptor kinase 1 substrate motif;MAPKAPK2 kinase substrate motif;Phosphorylase kinase substrate motif;PKA kinase substrate motif;PKC kinase substrate motif	+	HTP							0.79631	0.00253729	53.998	49.777	53.998	0.21008	6.83154	3831600	2953200	660	NaN	6.83154	B2RQG2	660	B2RQG2	B2RQG2		Phf3	DRNLQPRQRRSSRSFSLDEPPLFIPDNIATV	RRssRsFsLDEPPLF
+	-1.56777	S	3		___1	Aurora-A kinase substrate motif;b-Adrenergic Receptor kinase substrate motif;Casein kinase II substrate motif;PAK2 kinase substrate motif;Phosphorylase kinase substrate motif;Pim1 kinase substrate sequence;PKA kinase substrate motif;PKC kinase substrate motif	+	CST;HTP							1	0.000453864	98.04	53.615	96.113	-0.479	8.03282	64846000	43005000	279	NaN	8.03282	B9EKS2	279	B9EKS2	B9EKS2		Kdm3b	TIKAVKSSKGKKKRESIEGRDGRRRKSASDS	KGKKKREsIEGRDGR
+	-1.55911	S	2		___1	Casein kinase II substrate motif;PKA kinase substrate motif;PKC kinase substrate motif	+	HTP							0.963452	0.0553172	53.756	6.1536	53.756	0.098772	7.315	12867000	7787000	267	NaN	7.315	Q8VFU2	267	Q8VFU2	Q8VFU2		Olfr816	SCIFMYVKPSVKQRISISKGISVLNTSVAPL	PSVKQRIsISKGISV
+	-1.55652	S	2		___2	Casein kinase II substrate motif;ERK1,2 kinase substrate motif;GSK-3, ERK1, ERK2, CDK5 substrate motif;MAPKAPK2 kinase substrate motif;WW domain binding motif	+	CST;HTP							0.998813	1.46412e-78	210.16	210.16	191.46	1.3365	9.06521	655100000	506940000	217	NaN	9.06521	E9Q616	217	E9Q616	E9Q616		Ahnak	PGKTVIRLPSGSGPASPTTGSAVDIRAGAIS	PsGsGPAsPttGsAV	ERK2
+	-1.54523	S	2		___3	Casein kinase I substrate motif;ERK1,2 kinase substrate motif;G protein-coupled receptor kinase 1 substrate motif;GSK3 kinase substrate motif;GSK-3, ERK1, ERK2, CDK5 substrate motif;MDC1 BRCT domain binding motif;Plk1 PBD domain binding motif;WW domain binding motif									0.960257	1.95272e-41	157.01	139.39	86.359	0.23424	9.13631	844370000	524330000	174	NaN	9.13631	A2A6J7;A2A6J4	174;172	A2A6J7	A2A6J7		Lsp1	RTPSPLALEDTVELSSPPLSPTTKLADRTES
+	-1.54523	S	3		___3	Casein kinase II substrate motif;ERK1,2 kinase substrate motif;GSK-3, ERK1, ERK2, CDK5 substrate motif;MAPKAPK2 kinase substrate motif;WW domain binding motif									0.954146	1.95272e-41	157.01	139.39	108.22	0.10442	9.27196	1133000000	737540000	178	NaN	9.27196	A2A6J7;A2A6J4	178;176	A2A6J7	A2A6J7		Lsp1	PLALEDTVELSSPPLSPTTKLADRTESLNRS
+	-1.54523	S	2		___3	Casein kinase I substrate motif;ERK1,2 kinase substrate motif;G protein-coupled receptor kinase 1 substrate motif;GSK3 kinase substrate motif;GSK-3, ERK1, ERK2, CDK5 substrate motif;MDC1 BRCT domain binding motif;Plk1 PBD domain binding motif;WW domain binding motif	+	HTP							0.960257	1.95272e-41	157.01	139.39	86.359	0.23424	9.12189	815980000	508030000	180	NaN	9.12189	P19973;P19973-2	180;178	P19973	P19973	Lymphocyte-specific protein 1	Lsp1	RTPSPLALEDTVELSSPPLSPTTKLADRTES	EDtVELssPPLsPtt
+	-1.54523	S	3		___3	Casein kinase II substrate motif;ERK1,2 kinase substrate motif;GSK-3, ERK1, ERK2, CDK5 substrate motif;MAPKAPK2 kinase substrate motif;WW domain binding motif	+	HTP							0.954146	1.95272e-41	157.01	139.39	108.22	0.10442	9.26145	1104600000	721240000	184	NaN	9.26145	P19973;P19973-2	184;182	P19973	P19973	Lymphocyte-specific protein 1	Lsp1	PLALEDTVELSSPPLSPTTKLADRTESLNRS	ELssPPLsPttKLAD
+	-1.54326	S	3		___3	14-3-3 domain binding motif;AMP-activated protein kinase substrate motif;Calmodulin-dependent protein kinase II substrate motif;DNA dependent Protein kinase substrate motif;ERK1,2 kinase substrate motif;GSK-3, ERK1, ERK2, CDK5 substrate motif;HMGCoA Reductase kinase substrate motif;PKA kinase substrate motif;PKC kinase substrate motif;WW domain binding motif	+	CST;HTP							1	4.46034e-29	134.11	124.54	126.98	0.012604	9.1125	781420000	514260000	168	NaN	9.1125	P19973;P19973-2	168;166	P19973	P19973	Lymphocyte-specific protein 1	Lsp1	GEAEEHLIRHQVRTPSPLALEDTVELSSPPL	RHQVRtPsPLALEDt
+	-1.54015	S	3		___2										0.798691	7.64107e-29	132.61	129.92	114.13	0.83683	8.74933	330420000	231050000	173	NaN	8.74933	A2A6J7;A2A6J4	173;171	A2A6J7	A2A6J7		Lsp1	VRTPSPLALEDTVELSSPPLSPTTKLADRTE
+	-1.54015	S	3		___2		+	HTP							0.798691	7.64107e-29	132.61	129.92	114.13	0.83683	8.74933	330420000	231050000	179	NaN	8.74933	P19973;P19973-2	179;177	P19973	P19973	Lymphocyte-specific protein 1	Lsp1	VRTPSPLALEDTVELSSPPLSPTTKLADRTE	LEDtVELssPPLsPt
+	-1.53826	S	3		___1	Casein kinase II substrate motif;DNA dependent Protein kinase substrate motif;ERK1,2 kinase substrate motif;GSK-3, ERK1, ERK2, CDK5 substrate motif;WW domain binding motif	+	CST;HTP							0.992698	1.94506e-13	98.84	90.967	88.413	0.57833	8.66617	216270000	247370000	495	NaN	8.66617	E9QAS4;Q6PDQ2;E9QAS5	495;508;515	E9QAS4	E9QAS4	Chromodomain-helicase-DNA-binding protein 4	Chd4	GKVQKILIWKWGQPPSPTPVPRPPDADPNTP	WKWGQPPsPtPVPRP
+	-1.5355	S	3		___3	14-3-3 domain binding motif;AMP-activated protein kinase substrate motif;Calmodulin-dependent protein kinase II substrate motif;DNA dependent Protein kinase substrate motif;ERK1,2 kinase substrate motif;GSK-3, ERK1, ERK2, CDK5 substrate motif;HMGCoA Reductase kinase substrate motif;PKA kinase substrate motif;PKC kinase substrate motif;WW domain binding motif									1	4.46034e-29	134.11	124.54	126.98	0.012604	9.12723	809800000	530550000	162	NaN	9.12723	A2A6J7;A2A6J4	162;160	A2A6J7	A2A6J7		Lsp1	DAVGGSGEAEEVRTPSPLALEDTVELSSPPL
+	-1.51214	S	2		___1		+	HTP							0.999926	0.00147855	51.726	39.679	51.726	0.25792	6.70312	2832900	2215100	2	NaN	6.70312	Q497J0;P35175;D6REU3	2;2;2	Q497J0	Q497J0	Stefin-1	BC100530;Stfa1	______________MSLGGVSEASRATPEIQ	______MsLGGVSEA
+	-1.50197	S	2		___2	Casein kinase II substrate motif;MAPKAPK2 kinase substrate motif;PKA kinase substrate motif;PKC kinase substrate motif	+	CST;HTP							1	9.49174e-30	159.26	159.26	102.39	0.48216	9.29684	723930000	1256900000	1338	NaN	9.29684	Q8BTI8;Q8BTI8-2;Q8BTI8-3	1338;1242;1338	Q8BTI8	Q8BTI8	Serine/arginine repetitive matrix protein 2	Srrm2	DPSVDMKEQSRSSRRSSSELSPEVVEKVGLF	QsRssRRsssELsPE
+	-1.49957	S	4		___1	Casein kinase II substrate motif;G protein-coupled receptor kinase 1 substrate motif	+	CST;HTP							0.999945	3.0106e-18	69.045	68.568	69.045	-0.26192	7.32871	11266000	10050000	518	NaN	7.32871	Q5SXE4;Q61097-2;Q61097	518;532;518	Q5SXE4	Q5SXE4	Kinase suppressor of Ras 1	Ksr1	LGVHEAEAEEPEAGKSEAEDDEEDEVDDLPS	EEPEAGKsEAEDDEE
+	-1.49366	S	2		___1	Casein kinase II substrate motif;DNA dependent Protein kinase substrate motif;G protein-coupled receptor kinase 1 substrate motif;MAPKAPK2 kinase substrate motif	+	HTP							1	4.3423e-05	80.17	56.797	62.589	0.052418	7.89714	33333000	45579000	813	NaN	7.89714	E9PUK6;E9QKA4;A2A8V9;Q52KI8;A2A8V8;Q52KI8-2;F6UK16	813;813;808;836;799;813;243	E9PUK6	E9PUK6	Serine/arginine repetitive matrix protein 1	Srrm1	WSPAVPAKKAKSPTPSLSPARNSDQEGGGKK	KAKsPtPsLsPARNs
+	-1.47033	S	2		___2	G protein-coupled receptor kinase 1 substrate motif;GSK3 kinase substrate motif	+	CST;HTP							0.861677	8.77457e-31	141.71	134.94	141.71	-0.37825	8.11321	78932000	50843000	213	NaN	8.11321	E9Q616	213	E9Q616	E9Q616		Ahnak	VETQPGKTVIRLPSGSGPASPTTGSAVDIRA	VIRLPsGsGPAsPtt
+	-1.46709	S	2		___1	14-3-3 domain binding motif;Calmodulin-dependent protein kinase II substrate motif;G protein-coupled receptor kinase 1 substrate motif;PKA kinase substrate motif;PKC kinase substrate motif;ZIP kinase substrate motif	+	CST;HTP							1	4.48059e-17	125.73	109.55	120.9	0.22288	8.25885	98084000	83405000	309	NaN	8.25885	P46935	309	P46935	P46935	E3 ubiquitin-protein ligase NEDD4	Nedd4	MQLQAQRAFTTRRQISEDVDGPDNRESPENW	FTTRRQIsEDVDGPD
+	-1.46606	S	3		___1	Casein kinase II substrate motif;ERK1,2 kinase substrate motif;G protein-coupled receptor kinase 1 substrate motif;GSK-3, ERK1, ERK2, CDK5 substrate motif;WW domain binding motif	+	HTP							0.945248	0.000279511	75.548	70.337	69.188	0.50669	8.33524	127960000	88432000	289	NaN	8.33524	Q8VDF2	289	Q8VDF2	Q8VDF2	E3 ubiquitin-protein ligase UHRF1	Uhrf1	VLMIELPKERRPLIASPSQPPPALRNTGKSG	ERRPLIAsPsQPPPA
+	-1.45858	S	2		___1	14-3-3 domain binding motif;Calmodulin-dependent protein kinase II substrate motif;Calmodulin-dependent protein kinase IV substrate motif;Casein kinase II substrate motif;Chk1 kinase substrate motif;G protein-coupled receptor kinase 1 substrate motif;PKA kinase substrate motif;PKC kinase substrate motif	+	CST;HTP							0.999387	6.91914e-06	91.789	87.489	91.789	0.73455	7.61459	24108000	17063000	159	NaN	7.61459	Q99JP6;Q99JP6-2	159;159	Q99JP6	Q99JP6	Homer protein homolog 3	Homer3	VSTNGPGEEKLFRSQSADTPGPTERERLKKM	EKLFRsQsADtPGPT
+	-1.448	S	3		___2	Casein kinase II substrate motif;ERK1,2 kinase substrate motif;GSK-3, ERK1, ERK2, CDK5 substrate motif;MAPKAPK2 kinase substrate motif;WW domain binding motif									0.954146	1.95272e-41	157.01	139.39	108.22	0.10442	9.27196	1133000000	737540000	178	NaN	9.27196	A2A6J7;A2A6J4	178;176	A2A6J7	A2A6J7		Lsp1	PLALEDTVELSSPPLSPTTKLADRTESLNRS
+	-1.448	S	3		___2	Casein kinase II substrate motif;ERK1,2 kinase substrate motif;GSK-3, ERK1, ERK2, CDK5 substrate motif;MAPKAPK2 kinase substrate motif;WW domain binding motif	+	HTP							0.954146	1.95272e-41	157.01	139.39	108.22	0.10442	9.26145	1104600000	721240000	184	NaN	9.26145	P19973;P19973-2	184;182	P19973	P19973	Lymphocyte-specific protein 1	Lsp1	PLALEDTVELSSPPLSPTTKLADRTESLNRS	ELssPPLsPttKLAD
+	-1.42923	S	2		___1	ERK1,2 kinase substrate motif;G protein-coupled receptor kinase 1 substrate motif;Growth associated histone HI kinase substrate motif;GSK3 kinase substrate motif;GSK-3, ERK1, ERK2, CDK5 substrate motif;PKA kinase substrate motif;PKC kinase substrate motif;WW domain binding motif	+	CST;HTP							0.999996	0.0405144	63.216	11.87	63.216	0.1608	8.36357	142760000	88214000	67	NaN	8.36357	A2A6U3;Q80UG5-3;Q80UG5	67;78;85	A2A6U3	A2A6U3	Septin-9	2016-09-09	NSEPAARLVDSLSQRSPKPSLRRVELAGAKA	VDsLsQRsPKPsLRR
+	-1.42814	T	3		___3	Growth associated histone HI kinase substrate motif;GSK-3, ERK1, ERK2, CDK5 substrate motif;WW domain binding motif	+	CST;HTP							1	4.46034e-29	134.11	124.54	126.98	0.012604	8.61775	253270000	161450000	166	NaN	8.61775	P19973;P19973-2	166;164	P19973	P19973	Lymphocyte-specific protein 1	Lsp1	GSGEAEEHLIRHQVRTPSPLALEDTVELSSP	LIRHQVRtPsPLALE
+	-1.42612	S	2		___1	Casein kinase II substrate motif;ERK1,2 kinase substrate motif;GSK-3, ERK1, ERK2, CDK5 substrate motif;MDC1 BRCT domain binding motif;Plk1 PBD domain binding motif;WW domain binding motif	+	HTP							0.988053	1.09511e-16	130.12	130.12	105.63	0.33246	8.83446	406940000	276130000	28	NaN	8.83446	O35601;O35601-2	28;28	O35601	O35601	FYN-binding protein	Fyb	EAATSSRPFKVAGQSSPSGIQSRKNLFDNQG	FKVAGQssPsGIQSR
+	-1.42368	T	2		___1	PKA kinase substrate motif;PKC kinase substrate motif									0.771985	0.0064761	52.966	46.955	52.966	-0.82024	7.48661	17316000	13347000	689	NaN	7.48661	B1AXH1;E9Q0V6	689;1054	B1AXH1	B1AXH1	NHS-like protein 2	Nhsl2	CPSTGDDQKSPGKGVTSPLHTDTEKEAISPG
+	-1.4207	S	2		___1	Casein kinase II substrate motif;ERK1,2 kinase substrate motif;Growth associated histone HI kinase substrate motif;GSK-3, ERK1, ERK2, CDK5 substrate motif;PKA kinase substrate motif;PKC kinase substrate motif;WW domain binding motif									0.99753	0.00724713	64.827	41.735	56.938	0.43494	8.96227	637020000	279780000	312	NaN	8.96227	E9Q5C9	312	E9Q5C9	E9Q5C9		Nolc1	PYSSVPPPSVPLPKKSPGTQAPKKAAAQTQP
+	-1.40924	T	2		___1	G protein-coupled receptor kinase 1 substrate motif;GSK-3, ERK1, ERK2, CDK5 substrate motif;MDC1 BRCT domain binding motif;Plk1 PBD domain binding motif;WW domain binding motif	+	CST;HTP							0.758993	0.00331732	65.374	56.339	65.374	-0.0056169	7.23669	10179000	7067500	426	NaN	7.23669	Q03173-6;Q03173-3;Q03173-4;E9QKR1;Q03173-5;J3QNM3;E9QKQ9;Q03173;E9QLZ9;Q03173-2	426;460;702;704;706;708;708;721;723;309	Q03173-6	Q03173-6	Protein enabled homolog	Enah	NEDAEPITAKAPSTSTPEPTRKPWERTNTMN	AKAPStstPEPTRKP
+	-1.39551	T	3		___3	Casein kinase I substrate motif;Growth associated histone HI kinase substrate motif;GSK-3, ERK1, ERK2, CDK5 substrate motif;WW domain binding motif									1	4.46034e-29	134.11	124.54	126.98	0.012604	8.66219	281660000	177740000	160	NaN	8.66219	A2A6J7;A2A6J4	160;158	A2A6J7	A2A6J7		Lsp1	PEDAVGGSGEAEEVRTPSPLALEDTVELSSP
+	-1.38794	S	2		___2	Casein kinase I substrate motif;Casein kinase II substrate motif;MDC1 BRCT domain binding motif;Plk1 PBD domain binding motif	+	HTP							0.934472	3.68886e-08	108.58	99.879	47.548	1.1373	7.96546	49298000	43057000	679	NaN	7.96546	Q9JJY4	679	Q9JJY4	Q9JJY4	Probable ATP-dependent RNA helicase DDX20	Ddx20	TSSQSKGNKSYLEGSSDTQLKDTECTPVGGP	KsYLEGssDtQLKDT
+	-1.37744	S	3		___1	AMP-activated protein kinase substrate motif;ATM kinase substrate motif;Calmodulin-dependent protein kinase II substrate motif;Casein kinase II substrate motif;Chk1 kinase substrate motif;DNA dependent Protein kinase substrate motif;HMGCoA Reductase kinase substrate motif;PKA kinase substrate motif;PKC kinase substrate motif;Pyruvate dehydrogenase kinase substrate motif	+	CST;HTP							0.99285	1.35806e-07	109.15	65.384	109.15	-0.13162	7.60345	23107000	17022000	14	NaN	7.60345	A2AGS6;Q4QQM4	14;14	A2AGS6	A2AGS6	Tumor protein p53-inducible protein 11	Trp53i11	__MAGKQPPPLMKKHSQTDLVSRLKTRKILG	PPLMKKHsQtDLVSR
+	-1.37359	S	3		___1	14-3-3 domain binding motif;Calmodulin-dependent protein kinase II alpha substrate motif;Calmodulin-dependent protein kinase II substrate motif;Calmodulin-dependent protein kinase IV substrate motif;Casein kinase II substrate motif;Chk1 kinase substrate motif;MAPKAPK2 kinase substrate motif;Phosphorylase kinase substrate motif;PKA kinase substrate motif;PKC epsilon kinase substrate motif;PKC kina…	+	CST;HTP							0.999388	5.27831e-21	136.96	130.95	136.96	0.22623	8.36265	134150000	96337000	724	NaN	8.36265	D3Z079;Q8K400;F6WXQ4;Q8K400-2	724;760;83;6	D3Z079	D3Z079	Syntaxin-binding protein 5	Stxbp5	DRCKSPTSAKMSRKLSLPTDLKPDLDVKDNS	AKMSRKLsLPtDLkP
+	-1.37265	S	3		___1	14-3-3 domain binding motif;Calmodulin-dependent protein kinase II substrate motif;ERK1,2 kinase substrate motif;GSK-3, ERK1, ERK2, CDK5 substrate motif;PKA kinase substrate motif;PKC kinase substrate motif;WW domain binding motif;ZIP kinase substrate motif	+	CST;HTP							1	0.000423571	65.949	50.322	65.949	0.25522	7.21075	11983000	4263300	13	NaN	7.21075	D3Z2R5	13	D3Z2R5	D3Z2R5		Sepn1	___MGQARPAARRPHSPDPGAQPAPPRRRAR	PAARRPHsPDPGAQP
+	-1.36863	S	3		___1	BARD1 BRCT domain binding motif;Casein kinase II substrate motif;G protein-coupled receptor kinase 1 substrate motif;MAPKAPK2 kinase substrate motif	+	HTP							0.999999	4.07388e-27	149.12	130.54	149.12	-0.62058	8.09181	57799000	65745000	107	NaN	8.09181	R4GML3;E9Q9E7;R4GML4;R4GML6;A2AL36	107;801;802;1355;1355	R4GML3	R4GML3	Centriolin	Cep110;Cntrl	SKQREERRQKASTQHSEEEVDGLHRDIDDLL	QKAStQHsEEEVDGL
+	-1.36632	S	3		___1	14-3-3 domain binding motif;AMP-activated protein kinase substrate motif;Calmodulin-dependent protein kinase I substrate motif;Calmodulin-dependent protein kinase II substrate motif;Calmodulin-dependent protein kinase IV substrate motif;Casein kinase II substrate motif;Chk1 kinase substrate motif;PKA kinase substrate motif;PKC kinase substrate motif;Pyruvate dehydrogenase kinase substrate motif	+	CST;HTP;LTP	+	molecular association, regulation		14-3-3 beta(INDUCES); 14-3-3 epsilon(INDUCES)			0.973334	5.27686e-40	162.76	153.19	162.76	-0.078137	7.49915	15489000	16072000	680	NaN	7.49915	Q80U87;A2AI52	680;691	Q80U87	Q80U87	Ubiquitin carboxyl-terminal hydrolase 8	Usp8	PAERDREPSKLKRSYSSPDITQALQEEEKRR	SKLKRsYssPDItQA
+	-1.3655	S	2		___1		+	HTP							1	3.64454e-06	102.07	95.164	102.07	-1.9338	7.16501	8649200	5973000	2	NaN	7.16501	Q8CIN4	2	Q8CIN4	Q8CIN4	Serine/threonine-protein kinase PAK 2;PAK-2p27;PAK-2p34	Pak2	______________MSDNGELEDKPPAPPVR	______MsDNGELED
+	-1.35306	S	2		___1	Calmodulin-dependent protein kinase II substrate motif;Casein kinase II substrate motif;Chk1 kinase substrate motif;PKA kinase substrate motif;PKC kinase substrate motif	+	HTP							0.862046	0.00291555	75.788	55.473	75.788	-0.39171	7.49205	18485000	12564000	195	NaN	7.49205	B1ATR2;Q6ZPJ0	195;195	B1ATR2	B1ATR2	Testis-expressed sequence 2 protein	Tex2	ALSSAKPFMSLVKSLSTEVEPKESPHPPRHR	MSLVKSLstEVEPKE
+	-1.34905	S	3		___1	14-3-3 domain binding motif;Akt kinase substrate motif;Calmodulin-dependent protein kinase II substrate motif;Casein kinase II substrate motif;ERK1,2 kinase substrate motif;GSK-3, ERK1, ERK2, CDK5 substrate motif;MAPKAPK1 kinase substrate motif;PKA kinase substrate motif;PKC kinase substrate motif;WW domain binding motif	+	CST;HTP							0.996216	0.00118826	51.568	38.467	51.568	-0.90107	7.69963	33213000	16863000	62	NaN	7.69963	Z4YJH7;Q8QZS3	62;62	Z4YJH7	Z4YJH7	Folliculin	Flcn	EEEGGIQMSSRVRAHSPAEGASSESSSPGPK	SSRVRAHsPAEGASS
+	-1.34447	S	2		___1	ERK1,2 kinase substrate motif;GSK-3, ERK1, ERK2, CDK5 substrate motif;MDC1 BRCT domain binding motif;PKA kinase substrate motif;PKC kinase substrate motif;Plk1 PBD domain binding motif;WW domain binding motif	+	HTP							0.783747	0.00128208	84.169	46.174	55.04	0.14666	7.80445	31964000	31782000	83	NaN	7.80445	Q3UZA1;Q3UZA1-2	83;53	Q3UZA1;Q3UZA1-2	Q3UZA1	CapZ-interacting protein	Rcsd1	SPSGASHPPKIKVKSSPLIEKLQANLAFDPA	PKIKVKssPLIEKLQ
+	-1.3396	S	3		___1	DNA dependent Protein kinase substrate motif;PKA kinase substrate motif;PKC kinase substrate motif	+	HTP							1	0.00141018	51.009	51.009	51.009	-0.29916	7.43804	14521000	12896000	537	NaN	7.43804	P42932;H3BL49	537;478	P42932	P42932	T-complex protein 1 subunit theta	Cct8	DQIIMAKPAGGPKPPSGKKDWDDDQND____	AGGPkPPsGkkDWDD
+	-1.32836	S	2		___1	Casein kinase II substrate motif;ERK1,2 kinase substrate motif;GSK-3, ERK1, ERK2, CDK5 substrate motif;MDC1 BRCT domain binding motif;Plk1 PBD domain binding motif;WW domain binding motif	+	HTP							0.931917	1.99562e-08	97.107	86.161	53.693	-0.47702	8.43813	135590000	138650000	106	NaN	8.43813	Q8C5N3-2;B1AYU7;Q8C5N3;B1AYU4;B1AYU8	106;107;106;106;107	Q8C5N3-2	Q8C5N3-2	Pre-mRNA-splicing factor CWC22 homolog	Cwc22	SPSPDRSPARGGGQSSPQEEPTWKKKKDELD	ARGGGQssPQEEPTW
+	-1.31617	S	2		___1	14-3-3 domain binding motif;Akt kinase substrate motif;Calmodulin-dependent protein kinase II substrate motif;Casein kinase II substrate motif;G protein-coupled receptor kinase 1 substrate motif;MAPKAPK1 kinase substrate motif;PKA kinase substrate motif;PKC kinase substrate motif	+	CST;HTP							1	1.19074e-124	250.27	236.68	84.166	0.092869	9.04446	478140000	629630000	253	NaN	9.04446	Q05CL8	253	Q05CL8	Q05CL8	La-related protein 7	Larp7	SSSGVCKATKRPRTASEGSEAETPEAPKQPA	TKRPRtAsEGsEAEt
+	-1.31484	S	3		___1	14-3-3 domain binding motif;Calmodulin-dependent protein kinase II substrate motif;G protein-coupled receptor kinase 1 substrate motif;GSK3 kinase substrate motif;MAPKAPK2 kinase substrate motif;PKA kinase substrate motif;PKC epsilon kinase substrate motif;PKC kinase substrate motif	+	CST;HTP							0.941401	2.50722e-21	136.49	136.49	136.49	0.97041	8.068	66156000	50795000	236	NaN	8.068	E9Q6J5	236	E9Q6J5	E9Q6J5		Bod1l	EMSNAKVSERTSRKLSSQPSTDVSTDKERGS	ERTSRKLssQPstDV
+	-1.31272	S	3		___1	14-3-3 domain binding motif;Calmodulin-dependent protein kinase II substrate motif;Calmodulin-dependent protein kinase IV substrate motif;Casein kinase II substrate motif;Chk1 kinase substrate motif;G protein-coupled receptor kinase 1 substrate motif;MDC1 BRCT domain binding motif;PKA kinase substrate motif;PKC kinase substrate motif;Plk1 PBD domain binding motif									0.905693	5.00746e-07	93.495	87.018	71.685	-0.097404	8.34414	123330000	97540000	218	NaN	8.34414	Q811M1-2;B1AW40;Q811M1	218;218;218	Q811M1-2	Q811M1-2	Rho GTPase-activating protein 15	Arhgap15	PSCGSLELFNLQRSSSSELPSHCHIDRKEQK
+	-1.31072	S	2		___1	ERK1,2 kinase substrate motif;G protein-coupled receptor kinase 1 substrate motif;GSK3 kinase substrate motif;GSK-3, ERK1, ERK2, CDK5 substrate motif;MAPKAPK2 kinase substrate motif;MDC1 BRCT domain binding motif;PKA kinase substrate motif;PKC kinase substrate motif;Plk1 PBD domain binding motif;WW domain binding motif	+	HTP							0.997516	3.79215e-07	106.55	80.567	106.55	3.6119	8.53246	191520000	149250000	38	NaN	8.53246	Q8K352	38	Q8K352	Q8K352	SAM and SH3 domain-containing protein 3	Sash3	QRSSSFKDFAKSKPSSPVVSEKEFNLDDNIP	FAKsKPssPVVsEKE
+	-1.30982	S	2		___1	Casein kinase II substrate motif;ERK1,2 kinase substrate motif;GSK-3, ERK1, ERK2, CDK5 substrate motif;WW domain binding motif	+	HTP							0.918445	0.0038189	66.809	53.391	66.809	-0.024487	7.23091	11870000	5148200	104	NaN	7.23091	Q60932-2;Q60932;F2Z471	104;117;104	Q60932-2	Q60932-2	Voltage-dependent anion-selective channel protein 1	Vdac1	DQLARGLKLTFDSSFSPNTGKKNAKIKTGYK	LtFDssFsPNtGkkN
+	-1.29286	S	2		___1	14-3-3 domain binding motif;Calmodulin-dependent protein kinase II substrate motif;Calmodulin-dependent protein kinase IV substrate motif;Casein kinase II substrate motif;Chk1 kinase substrate motif;G protein-coupled receptor kinase 1 substrate motif;MAPKAPK2 kinase substrate motif;PKA kinase substrate motif;PKC epsilon kinase substrate motif;PKC kinase substrate motif	+	CST;HTP							1	0.0279335	40.727	29.563	40.727	-0.5773	7.87654	39819000	35437000	775	NaN	7.87654	P47857	775	P47857	P47857	6-phosphofructokinase, muscle type	Pfkm	DTSDHAHLEHISRKRSGEAAV__________	EHISRKRsGEAAV__
+	-1.2707	S	2		___1	14-3-3 domain binding motif;BARD1 BRCT domain binding motif;Calmodulin-dependent protein kinase II substrate motif;Casein kinase II substrate motif;G protein-coupled receptor kinase 1 substrate motif;PKA kinase substrate motif;PKC epsilon kinase substrate motif;PKC kinase substrate motif	+	CST;HTP							1	1.92226e-05	98.337	93.792	98.337	0.8089	8.27124	98485000	88256000	639	7.70561	8.13344	Q8K4I3;F6WMJ3;A2AFJ8;H3BKQ0	639;663;351;237	Q8K4I3	Q8K4I3	Rho guanine nucleotide exchange factor 6	Arhgef6	TMKKFLHKRKTERKASEEEYVIRKSTAALEE	RKTERKAsEEEyVIR
+	-1.26774	S	2		___1	14-3-3 domain binding motif;ATM kinase substrate motif;Calmodulin-dependent protein kinase II substrate motif;Casein kinase II substrate motif;DNA dependent Protein kinase substrate motif;PAK2 kinase substrate motif;PKA kinase substrate motif;PKC epsilon kinase substrate motif;PKC kinase substrate motif;Pyruvate dehydrogenase kinase substrate motif	+	CST;HTP							1	0.001616	97.175	52.456	56.043	0.21006	9.2306	995960000	704620000	228	NaN	9.2306	Q8CI51;Q8CI51-3;F8WJI6;E9Q8P5;Q8CI51-2	228;119;119;119;228	Q8CI51	Q8CI51	PDZ and LIM domain protein 5	Pdlim5	CSESAQELAEGQRRGSQGDIKQQNGPPRKHI	AEGQRRGsQGDIKQQ
+	-1.25065	S	3		___1	b-Adrenergic Receptor kinase substrate motif;Casein kinase II substrate motif;MAPKAPK2 kinase substrate motif;Pyruvate dehydrogenase kinase substrate motif	+	HTP							0.964623	1.03278e-37	141.38	141.38	141.38	-0.48893	8.17391	90740000	58510000	507	NaN	8.17391	Q9DBX5;P47713	507;515	Q9DBX5	Q9DBX5	Cytosolic phospholipase A2;Phospholipase A2;Lysophospholipase	Pla2g4a	TSYPLSPLRDFSSQDSFDDELDAAVADPDEF	RDFssQDsFDDELdA
+	-1.24424	S	2		___1	ERK1,2 kinase substrate motif;GSK-3, ERK1, ERK2, CDK5 substrate motif;MDC1 BRCT domain binding motif;PKA kinase substrate motif;PKC kinase substrate motif;Plk1 PBD domain binding motif;WW domain binding motif									0.992805	0.0244138	56.205	24.727	56.205	-0.073417	7.63044	25105000	17597000	221	NaN	7.63044	J3QNH8	221	J3QNH8	J3QNH8		Gm7694	QEEAKLKATEGKKSSSPGPIERNGLKLSLSP
+	-1.23708	S	2		___1	Casein kinase I substrate motif;ERK1,2 kinase substrate motif;Growth associated histone HI kinase substrate motif;GSK-3, ERK1, ERK2, CDK5 substrate motif;PKA kinase substrate motif;PKC kinase substrate motif;WW domain binding motif	+	HTP							1	2.5506e-09	131.96	123.96	131.96	-1.3487	8.01599	55899000	47851000	2985	NaN	8.01599	E9Q616	2985	E9Q616	E9Q616		Ahnak	PNIEGDLKGPSLDIKSPKLDVNAPDIDVHGP	GPsLDIKsPKLDVNA	ERK2
+	-1.23688	S	2		___1	Casein kinase II substrate motif;ERK1,2 kinase substrate motif;G protein-coupled receptor kinase 1 substrate motif;GSK3 kinase substrate motif;GSK-3, ERK1, ERK2, CDK5 substrate motif;WW domain binding motif	+	HTP							0.999632	5.34015e-14	136.6	133.39	136.6	0.007938	7.74199	30491000	24715000	877	NaN	7.74199	Q8BZN6;E9QM99;Q8BZN6-2;Q8BZN6-3	877;877;877;877	Q8BZN6	Q8BZN6	Dedicator of cytokinesis protein 10	Dock10	AFFRQCQKREKDMSQSPTSSFVRACKNLLNV	REKDMsQsPtssFVR
+	-1.23114	S	2		___1	ERK1,2 kinase substrate motif;GSK-3, ERK1, ERK2, CDK5 substrate motif;MAPKAPK2 kinase substrate motif;WW domain binding motif	+	HTP							0.999739	0.00216113	74.962	59.818	74.962	-0.2882	7.59165	18650000	20403000	297	NaN	7.59165	O54972;B7ZP57;O54972-2;E9QM80	297;297;236;262	O54972	O54972	Protein CBFA2T3	Cbfa2t3	DPLHPDHLSKRSCTLSPAQRCSPSNGLPHPT	SKRSCTLsPAQRCSP
+	-1.22722	S	2		___2	DNA dependent Protein kinase substrate motif;ERK1,2 kinase substrate motif;GSK-3, ERK1, ERK2, CDK5 substrate motif;PKA kinase substrate motif;PKC kinase substrate motif;WW domain binding motif	+	CST;HTP							0.99847	5.20918e-29	141.64	137.09	141.64	0.4777	8.7961	352090000	273220000	267	NaN	8.7961	O08539-2;Q6P1B9;O08539	267;267;298	O08539-2	O08539-2	Myc box-dependent-interacting protein 1	Bin1	AQPSDNAPEKGNKSPSPPPDGSPAATPEIRV	EKGNKsPsPPPDGsP
+	-1.22722	S	2		___2	ERK1,2 kinase substrate motif;G protein-coupled receptor kinase 1 substrate motif;GSK-3, ERK1, ERK2, CDK5 substrate motif;WW domain binding motif	+	CST;HTP							0.920399	0.000225549	50.87	50.87	43.349	0.53298	7.71576	32572000	19399000	273	NaN	7.71576	O08539-2;Q6P1B9;O08539	273;273;304	O08539-2	O08539-2	Myc box-dependent-interacting protein 1	Bin1	APEKGNKSPSPPPDGSPAATPEIRVNHEPEP	PsPPPDGsPAAtPEI
+	-1.21535	S	2		___1	14-3-3 domain binding motif;Calmodulin-dependent protein kinase II substrate motif;PAK2 kinase substrate motif;PKA kinase substrate motif;PKC epsilon kinase substrate motif;PKC kinase substrate motif	+	CST;HTP							1	0.0232885	83.623	83.623	83.623	-0.34459	7.56613	20309000	16515000	1532	NaN	7.56613	E9Q394;E9Q474;F7CVS3;F6RPP1;F6VCM8	1532;1528;228;371;725	E9Q394	E9Q394		Akap13	FLRSSMRSLSPFRRHSWGPGKNAASDAEMNQ	LsPFRRHsWGPGKNA
+	-1.21	S	2		___1	Casein kinase I substrate motif;ERK1,2 kinase substrate motif;Growth associated histone HI kinase substrate motif;GSK-3, ERK1, ERK2, CDK5 substrate motif;PKA kinase substrate motif;PKC kinase substrate motif;WW domain binding motif	+	HTP							1	0.00725038	99.864	54.299	92.428	-0.064685	8.57117	207220000	165320000	4857	NaN	8.57117	E9Q616	4857	E9Q616	E9Q616		Ahnak	VSVAGPDAALKAEVKSPKVKKTMFGKMYFPD	ALKAEVKsPKVKKTM
+	-1.2059	S	2		___1	14-3-3 domain binding motif;AMP-activated protein kinase substrate motif;Calmodulin-dependent protein kinase I substrate motif;Calmodulin-dependent protein kinase II alpha substrate motif;Calmodulin-dependent protein kinase II substrate motif;Calmodulin-dependent protein kinase IV substrate motif;Chk1 kinase substrate motif;HMGCoA Reductase kinase substrate motif;Phosphorylase kinase substrate mo…	+	CST;HTP							0.999995	0.00521591	64.52	58.805	62.861	0.29832	7.37116	11534000	11970000	2098	NaN	7.37116	G5E8Q0;P97412	2098;2099	G5E8Q0	G5E8Q0	Lysosomal-trafficking regulator	Lyst	NIVPQRMAAQMVRSRSLPAFPTYLPLIRAQK	AQMVrsRsLPAFPTY
+	-1.2032	S	3		___1	Casein kinase I substrate motif;Casein kinase II substrate motif;Cdc2 kinase substrate motif;CDK kinase substrate motif;CDK1,2,4,6 kinase substrate motif;DNA dependent Protein kinase substrate motif;ERK1,2 kinase substrate motif;G protein-coupled receptor kinase 1 substrate motif;GSK-3, ERK1, ERK2, CDK5 substrate motif;WW domain binding motif	+	HTP							0.950752	1.52466e-16	94.802	90.306	69.215	2.7698	8.11348	78950000	50906000	279	NaN	8.11348	Q8K124	279	Q8K124	Q8K124	Pleckstrin homology domain-containing family O member 2	Plekho2	NSTLSEKLKVSWENPSPEKPSAPESAQLSSS	KVSWENPsPEKPSAP
+	-1.19992	S	2		___1	Cdc2 kinase substrate motif;CDK kinase substrate motif;CDK1,2,4,6 kinase substrate motif;ERK1,2 kinase substrate motif;Growth associated histone HI kinase substrate motif;GSK-3, ERK1, ERK2, CDK5 substrate motif;MAPKAPK2 kinase substrate motif;MDC1 BRCT domain binding motif;Plk1 PBD domain binding motif;WW domain binding motif	+	CST;HTP							0.960943	0.00215428	84.102	43.627	76.24	0.041454	7.7959	41593000	20910000	360	NaN	7.7959	Q9Z2D6;Q9Z2D6-2	360;377	Q9Z2D6	Q9Z2D6	Methyl-CpG-binding protein 2	Mecp2	KSKESSPKGRSSSASSPPKKEHHHHHHHSES	GRSSSASsPPKKEHH
+	-1.19786	S	2		___1	b-Adrenergic Receptor kinase substrate motif;Casein kinase II substrate motif;ERK1,2 kinase substrate motif;GSK-3, ERK1, ERK2, CDK5 substrate motif;WW domain binding motif	+	CST;HTP							0.982026	0.0046021	49.595	36.799	49.595	-0.074968	7.03842	5651300	5273500	358	NaN	7.03842	Q8BZ47	358	Q8BZ47	Q8BZ47	Zinc finger protein 609	Znf609	LDCTRHDWAPPRFCDSPTSDLEMRNGRGRGK	APPRFCDsPtsDLEM
+	-1.19753	S	2		___1	14-3-3 domain binding motif;AMP-activated protein kinase 2 substrate motif;Calmodulin-dependent protein kinase II substrate motif;Casein kinase II substrate motif;MAPKAPK1 kinase substrate motif;PKA kinase substrate motif;PKC kinase substrate motif;Pyruvate dehydrogenase kinase substrate motif	+	CST							0.966002	0.0697243	64.73	12.004	64.73	-0.25228	7.3954	14082000	10771000	973	NaN	7.3954	E9Q1U8;Q64127-2;Q64127	973;1009;1043	E9Q1U8	E9Q1U8	Transcription intermediary factor 1-alpha	Trim24	DSDDDFVQPRKKRLKSTEDRQLLK_______	PRKKRLKstEDRQLL
+	-1.19691	S	2		___2	Casein kinase II substrate motif;Cdc2 kinase substrate motif;CDK kinase substrate motif;CDK1,2,4,6 kinase substrate motif;ERK1,2 kinase substrate motif;Growth associated histone HI kinase substrate motif;GSK-3, ERK1, ERK2, CDK5 substrate motif;MAPKAPK2 kinase substrate motif;MDC1 BRCT domain binding motif;Plk1 PBD domain binding motif;WW domain binding motif	+	HTP							0.951794	4.3171e-24	161.82	136.63	161.82	-0.22282	8.94626	384600000	499010000	71	NaN	8.94626	Q3U9G9	71	Q3U9G9	Q3U9G9	Lamin-B receptor	Lbr	PLKSFKQRKSGSISSSPSRRRGSRSRSRSRS	KsGsIsssPsRRRGS
+	-1.19453	S	3		___1	14-3-3 domain binding motif;Calmodulin-dependent protein kinase II substrate motif;Casein kinase II substrate motif;G protein-coupled receptor kinase 1 substrate motif;PAK2 kinase substrate motif;PKA kinase substrate motif;PKC epsilon kinase substrate motif;PKC kinase substrate motif	+	CST;HTP							0.973393	1.71267e-08	102.29	88.705	91.789	-0.0012077	8.10329	66782000	60069000	431	NaN	8.10329	Q60520;Q60520-1	431;431	Q60520	Q60520	Paired amphipathic helix protein Sin3a	Sin3a	KPQRPSQNGCQIRRHSGTGATPPVKKKPKLM	GCQIRRHsGtGAtPP
+	-1.19288	S	3		___1	14-3-3 domain binding motif;Calmodulin-dependent protein kinase II substrate motif;Casein kinase II substrate motif;PAK2 kinase substrate motif;PKA kinase substrate motif;PKA, PKG kinase substrate motif;PKC epsilon kinase substrate motif;PKC kinase substrate motif;PKG kinase substrate motif	+	HTP							1	0.00379952	60.255	21.952	60.255	-0.027449	7.52921	18330000	15493000	650	NaN	7.52921	Q3UHD9-2;Q3UHD9	650;650	Q3UHD9-2	Q3UHD9-2	Arf-GAP with GTPase, ANK repeat and PH domain-containing protein 2	Agap2	RAAKRRTSLFANRRGSDAEKRSLDSRGETTG	LFANRRGsDAEKRSL
+	-1.18079	S	3		___1	Casein kinase II substrate motif;ERK1, ERK2, SAPK, CDK5 and GSK3 kinase substrate motif;ERK1,2 kinase substrate motif;G protein-coupled receptor kinase 1 substrate motif;Growth associated histone HI kinase substrate motif;GSK-3, ERK1, ERK2, CDK5 substrate motif;WW domain binding motif									0.997785	0.00127216	75.968	69.763	75.968	0.21149	7.46201	19282000	9692800	50	NaN	7.46201	Q9CR55	50	Q9CR55	Q9CR55	UPF0547 protein C16orf87 homolog		IFISRKLLNAKHSEKSPPSTENKHEAKRRRT
+	-1.17615	S	4		___1	ERK1,2 kinase substrate motif;GSK-3, ERK1, ERK2, CDK5 substrate motif;WW domain binding motif	+	HTP;LTP							0.993706	5.84956e-99	211.49	202.46	163.46	-0.94505	9.0327	592600000	485610000	404	NaN	9.0327	Q8BWG8-2;Q8BWG8;J3QNU6	404;412;413	Q8BWG8-2	Q8BWG8-2	Beta-arrestin-1	Arrb1	KGMKDDKDEEDDGTGSPHLNNR_________	EEDDGtGsPHLNNR_
+	-1.17026	S	2		___1	Casein kinase II substrate motif;ERK1,2 kinase substrate motif;GSK-3, ERK1, ERK2, CDK5 substrate motif;WW domain binding motif	+	HTP							0.999244	3.73737e-51	175.28	160.12	170.04	-0.36383	9.36871	1297900000	1039400000	110	NaN	9.36871	O09044;Q9D3L3;B0R030	110;121;110	O09044	O09044	Synaptosomal-associated protein 23;Synaptosomal-associated protein	Snap23	SGKNYKATWGDGGDNSPSNVVSKQPSRITNG	WGDGGDNsPsNVVsk
+	-1.14293	S	3		___1	ERK1,2 kinase substrate motif;G protein-coupled receptor kinase 1 substrate motif;GSK-3, ERK1, ERK2, CDK5 substrate motif;WW domain binding motif	+	HTP							0.999982	1.99889e-11	105.51	98.078	105.51	-0.1211	7.70561	22672000	28098000	300	NaN	7.70561	Q8BRF7-2;Q8BRF7-3;Q8BRF7	300;300;300	Q8BRF7-2	Q8BRF7-2	Sec1 family domain-containing protein 1	Scfd1	HLNRVNLEESTGVENSPAGARPKRKNKKSYD	EstGVENsPAGARPK
+	-1.14194	S	2		___1	G protein-coupled receptor kinase 1 substrate motif									0.999896	0.0138151	56.039	26.459	56.039	-0.85928	7.63019	18713000	23964000	4	NaN	7.63019	Q9CQ43	4	Q9CQ43	Q9CQ43		Dut	____________MPCSEDAAAVSASKRARAE
+	-1.13666	T	2		___1	DNA dependent Protein kinase substrate motif	+	CST;HTP							0.840171	0.000872765	49.141	49.141	49.141	-0.6263	7.24477	9008700	8560800	515	NaN	7.24477	Q8R1Q8	515	Q8R1Q8	Q8R1Q8	Cytoplasmic dynein 1 light intermediate chain 1	Dync1li1	DRITRKPASVSPTTPTSPTEGEAS_______	sVsPttPtsPtEGEA
+	-1.13451	S	2		___1	14-3-3 domain binding motif;Calmodulin-dependent protein kinase II substrate motif;Casein kinase II substrate motif;PKA kinase substrate motif;PKC kinase substrate motif	+	CST;HTP							1	6.14716e-10	110.77	105.41	103.6	-1.2587	7.91329	29160000	52741000	628	NaN	7.91329	Q3UMU9;Q3UMU9-3	628;637	Q3UMU9	Q3UMU9	Hepatoma-derived growth factor-related protein 2	Hdgfrp2	AQEDGQDSEDGPRGGSSEELHDSPRDNSDPA	EDGPRGGssEELHDs
+	-1.12756	S	2		___1	ATM kinase substrate motif;DNA dependent Protein kinase substrate motif;PKA kinase substrate motif;PKC kinase substrate motif	+	HTP							1	0.00294078	55.097	49.831	55.097	-0.32681	7.43762	13060000	14331000	189	NaN	7.43762	Q9R1T2-2;Q9R1T2	189;189	Q9R1T2-2	Q9R1T2-2	SUMO-activating enzyme subunit 1;SUMO-activating enzyme subunit 1, N-terminally processed	Sae1	GEHEFVEEKTKVAKVSQGVEDGPEAKRAKLD	KTKVAkVsQGVEDGP
+	-1.11132	S	3		___1	b-Adrenergic Receptor kinase substrate motif;G protein-coupled receptor kinase 1 substrate motif	+	CST;HTP							0.999823	2.33334e-37	164.02	149.58	163.79	1.5638	8.23058	84316000	85732000	295	NaN	8.23058	Q8C1D8-2;Q8C1D8	295;295	Q8C1D8-2	Q8C1D8-2	Protein IWS1 homolog	Iws1	SDGENKREDSEVQNESDGHTDRKGLHSSDSE	DsEVQNEsDGHtDRK
+	-1.10839	S	3		___1	ERK1,2 kinase substrate motif;GSK-3, ERK1, ERK2, CDK5 substrate motif;WW domain binding motif	+	HTP							1	1.36153e-17	131.96	123.62	131.96	0.55086	8.27871	97733000	92242000	245	NaN	8.27871	Q9ES52-2;Q9ES52;Q9ES52-3;Q9ES52-4	245;246;246;245	Q9ES52-2	Q9ES52-2	Phosphatidylinositol 3,4,5-trisphosphate 5-phosphatase 1	Inpp5d	LPSLESLQRLFDQQLSPGLRPRPQVPGEASP	RLFDQQLsPGLRPRP	PKACA
+	-1.1051	T	2		___1	Casein kinase II substrate motif;GSK-3, ERK1, ERK2, CDK5 substrate motif;RAF1 kinase substrate motif;WW domain binding motif	+	CST;HTP							0.962171	9.25131e-25	152.07	118.87	152.07	-2.4135	8.01712	50387000	53633000	1317	NaN	8.01712	Q9QY06;E9PZW8;Q9QY06-2;Q9QY06-3;E9QKV6;E9PWZ6	1317;1328;1346;1317;1317;1328	Q9QY06	Q9QY06	Unconventional myosin-IXb	Myo9b	SLDLSEKHRATGAALTPTEERRISFSTSDIS	RATGAALtPtEERRI	ERK2
+	-1.10231	S	2		___1	14-3-3 domain binding motif;Akt kinase substrate motif;Calmodulin-dependent protein kinase II substrate motif;Casein kinase II substrate motif;G protein-coupled receptor kinase 1 substrate motif;MAPKAPK1 kinase substrate motif;PKA kinase substrate motif;PKC kinase substrate motif	+	CST;HTP							0.922073	6.34781e-05	67.418	67.418	56.708	-0.36229	7.6155	16025000	25232000	2833	NaN	7.6155	F6SMY7;Q7TPH6-2;Q7TPH6;E9PUJ6;F7CZG3	2833;2905;2905;2943;544	F6SMY7	F6SMY7	Probable E3 ubiquitin-protein ligase MYCBP2	Mycbp2	APAKTKLDPPRERSKSDSYTLDPDTLRKKKM	PPRErsKsDsYtLDP
+	-1.09425	S	2		___1	Casein kinase II substrate motif;MAPKAPK2 kinase substrate motif;PKA kinase substrate motif;PKC kinase substrate motif	+	HTP							0.999936	1.25105e-13	119.8	119.8	119.8	-0.052947	7.81457	41779000	23470000	289	NaN	7.81457	P97492	289	P97492	P97492	Regulator of G-protein signaling 14	Rgs14	GFLAFVSSKSESHRKSLGSGESESESRPGKY	KSESHRKsLGsGESE
+	-1.08599	S	2		___1	ERK1,2 kinase substrate motif;G protein-coupled receptor kinase 1 substrate motif;GSK3 kinase substrate motif;GSK-3, ERK1, ERK2, CDK5 substrate motif;WW domain binding motif	+	HTP							0.999965	3.20155e-08	96.238	91.183	96.238	-1.6156	8.03507	63814000	44596000	4	NaN	8.03507	Q99KH8	4	Q99KH8	Q99KH8	Serine/threonine-protein kinase 24;Serine/threonine-protein kinase 24 35 kDa subunit;Serine/threonine-protein kinase 24 12 kDa subunit	Stk24	____________MAHSPVQSGLPGMQNLKAD	____MAHsPVQsGLP
+	-1.08381	S	3		___1	b-Adrenergic Receptor kinase substrate motif;Casein kinase II substrate motif;ERK1,2 kinase substrate motif;GSK-3, ERK1, ERK2, CDK5 substrate motif;WW domain binding motif	+	CST;HTP							0.881339	7.54701e-17	97.913	95.915	97.913	0.18475	7.76939	28559000	30243000	790	NaN	7.76939	Q61165	790	Q61165	Q61165	Sodium/hydrogen exchanger 1	Slc9a1	SSPGTDDVFTPGSSDSPSSQRIQRCLSDPGP	FtPGssDsPssQRIQ
+	-1.081	S	2		___1	b-Adrenergic Receptor kinase substrate motif;Casein kinase II substrate motif;ERK1,2 kinase substrate motif;G protein-coupled receptor kinase 1 substrate motif;GSK3 kinase substrate motif;GSK-3, ERK1, ERK2, CDK5 substrate motif;PKA kinase substrate motif;PKC kinase substrate motif;WW domain binding motif	+	HTP							0.997237	3.87046e-29	147.25	141.12	120.41	0.37147	8.7299	282910000	254000000	1264	NaN	8.7299	Q9QY06;E9PZW8;Q9QY06-2;Q9QY06-3;E9QKV6;E9PWZ6	1264;1275;1293;1264;1264;1275	Q9QY06	Q9QY06	Unconventional myosin-IXb	Myo9b	KDKDESSTKAQDKPESPSGSTQIQRYQHPDT	KAQDKPEsPsGstQI
+	-1.07652	S	4		___2	DNA dependent Protein kinase substrate motif;ERK1,2 kinase substrate motif;GSK-3, ERK1, ERK2, CDK5 substrate motif;WW domain binding motif	+	CST;HTP							0.86052	1.79381e-07	68.161	62.594	68.161	-0.007512	7.99388	35533000	63068000	48	NaN	7.99388	Q62172	48	Q62172	Q62172	RalA-binding protein 1	Ralbp1	ISPTKFPGLYRTGEPSPPHDVLHEPPDTVSD	LYRTGEPsPPHDVLH
+	-1.07652	S	4		___2	Casein kinase I substrate motif;Casein kinase II substrate motif;Pyruvate dehydrogenase kinase substrate motif	+	CST;HTP							0.967461	1.79381e-07	68.161	62.594	68.161	-0.007512	7.99388	35533000	63068000	62	NaN	7.99388	Q62172	62	Q62172	Q62172	RalA-binding protein 1	Ralbp1	PSPPHDVLHEPPDTVSDDDKDHGKKKGKFKK	HEPPDtVsDDDKDHG
+	-1.07315	S	2		___1	Casein kinase II substrate motif;G protein-coupled receptor kinase 1 substrate motif	+	HTP							0.823569	7.12966e-07	87.554	83.639	81.016	0.038214	8.66	239300000	217790000	2	NaN	8.66	P43277	2	P43277	P43277	Histone H1.3	Hist1h1d	______________MSETAPAAPAAPAPVEK	______MsEtAPAAP
+	-1.07172	S	2		___1	Casein kinase I substrate motif;Cdc2 kinase substrate motif;CDK kinase substrate motif;CDK1,2,4,6 kinase substrate motif;ERK1,2 kinase substrate motif;Growth associated histone HI kinase substrate motif;GSK-3, ERK1, ERK2, CDK5 substrate motif;PKA kinase substrate motif;PKC kinase substrate motif;WW domain binding motif	+	HTP							0.999987	0.0547938	51.286	34.055	51.286	-0.21606	6.80808	2970300	3457900	1106	NaN	6.80808	Q9QY06;E9PZW8;Q9QY06-2;Q9QY06-3;E9QKV6;E9PWZ6	1106;1106;1135;1106;1106;1106	Q9QY06	Q9QY06	Unconventional myosin-IXb	Myo9b	GVEAETWMNKSPDGMSPKKETPSPEMETAAQ	NKSPDGMsPKKEtPs
+	-1.07115	S	3		___1	14-3-3 domain binding motif;Aurora-A kinase substrate motif;Calmodulin-dependent protein kinase II alpha substrate motif;Calmodulin-dependent protein kinase II substrate motif;Calmodulin-dependent protein kinase IV substrate motif;PAK2 kinase substrate motif;Phosphorylase kinase substrate motif;PKA kinase substrate motif;PKC epsilon kinase substrate motif;PKC kinase substrate motif	+	CST;HTP;LTP							1	4.47871e-44	164.35	164.35	164.35	-0.213	9.03759	577710000	512660000	112	NaN	9.03759	P31324	112	P31324	P31324	cAMP-dependent protein kinase type II-beta regulatory subunit	Prkar2b	GAFNAPVINRFTRRASVCAEAYNPDEEEDDA	NRFTRRAsVCAEAyN
+	-1.06785	S	2		___1	Casein kinase I substrate motif;DNA dependent Protein kinase substrate motif;ERK1,2 kinase substrate motif;G protein-coupled receptor kinase 1 substrate motif;Growth associated histone HI kinase substrate motif;GSK3 kinase substrate motif;GSK-3, ERK1, ERK2, CDK5 substrate motif;PKA kinase substrate motif;PKC kinase substrate motif;WW domain binding motif	+	HTP							1	0.00039073	88.092	71.473	80.746	-1.4364	7.4991	15830000	15727000	12	NaN	7.4991	B1AZA5;D3YWD3	12;12	B1AZA5	B1AZA5	Transmembrane protein 245	Tmem245	____MADRGGPAEAPSPRGSPRPESRAPRTV	GGPAEAPsPRGsPRP
+	-1.06673	S	3		___1	BARD1 BRCT domain binding motif;Casein kinase II substrate motif;G protein-coupled receptor kinase 1 substrate motif	+	CST;HTP							0.998372	9.4073e-49	191.37	185.83	80.738	-0.14318	8.74002	287040000	262510000	5607	NaN	8.74002	E9Q616	5607	E9Q616	E9Q616		Ahnak	GGLGSKSKGHYEVTGSDDEAGKLQGSGVSLA	GHyEVtGsDDEAGKL
+	-1.06241	T	2		___1	Casein kinase II substrate motif;ERK1,2 kinase substrate motif;GSK3, Erk1, Erk2 and CDK5 kinase motif;GSK-3, ERK1, ERK2, CDK5 substrate motif;WW domain binding motif	+	CST;HTP							0.999288	0.00424204	70.272	51.45	63.754	0.5772	7.86764	51446000	22283000	670	NaN	7.86764	Q6PFD9	670	Q6PFD9	Q6PFD9	Nuclear pore complex protein Nup98-Nup96;Nuclear pore complex protein Nup98;Nuclear pore complex protein Nup96	Nup98	VSRFYTNPIAKPIPQTPESVGNKNNSSSNVE	IAkPIPQtPEsVGNK
+	-1.0616	S	3		___1	ERK1,2 kinase substrate motif;GSK-3, ERK1, ERK2, CDK5 substrate motif;WW domain binding motif	+	HTP							0.999977	4.17158e-06	48.286	45.595	48.286	1.0652	8.36453	98370000	133120000	7	NaN	8.36453	Q9WVH4;H9KUZ0	7;7	Q9WVH4	Q9WVH4	Forkhead box protein O3	Foxo3	_________MAEAPASPVPLSPLEVELDPEF	_MAEAPAsPVPLsPL
+	-1.05472	S	2		___1	Casein kinase II substrate motif;ERK1,2 kinase substrate motif;GSK-3, ERK1, ERK2, CDK5 substrate motif;MAPKAPK2 kinase substrate motif;WW domain binding motif	+	CST;HTP							0.998813	1.46412e-78	210.16	210.16	191.46	1.3365	9.06521	655100000	506940000	217	NaN	9.06521	E9Q616	217	E9Q616	E9Q616		Ahnak	PGKTVIRLPSGSGPASPTTGSAVDIRAGAIS	PsGsGPAsPttGsAV	ERK2
+	-1.05245	T	3		___1	AMP-activated protein kinase substrate motif;Calmodulin-dependent protein kinase II substrate motif;Casein kinase II substrate motif;Chk1 kinase substrate motif;Growth associated histone HI kinase substrate motif;GSK-3, ERK1, ERK2, CDK5 substrate motif;PKA kinase substrate motif;PKC kinase substrate motif;WW domain binding motif	+	HTP							1	0.000833367	76.326	70.545	49.448	-0.52314	7.92589	43543000	40769000	131	NaN	7.92589	Q9WTX5;E9PUV4	131;83	Q9WTX5	Q9WTX5	S-phase kinase-associated protein 1	Skp1;Skp1a	LDVTCKTVANMIKGKTPEEIRKTFNIKNDFT	ANMIkGKtPEEIRkT
+	-1.04225	S	2		___1	Casein kinase I substrate motif;Casein kinase II substrate motif;Cdc2 kinase substrate motif;CDK kinase substrate motif;CDK1,2,4,6 kinase substrate motif;ERK1,2 kinase substrate motif;G protein-coupled receptor kinase 1 substrate motif;Growth associated histone HI kinase substrate motif;GSK-3, ERK1, ERK2, CDK5 substrate motif;MDC1 BRCT domain binding motif;Plk1 PBD domain binding motif;WW domain …	+	HTP							0.849944	1.25367e-10	119.54	106.75	116.11	0.18387	8.14619	64952000	75067000	1060	NaN	8.14619	P30415	1060	P30415	P30415	NK-tumor recognition protein;Putative peptidyl-prolyl cis-trans isomerase	Nktr	KDGIPNVEKTCDEGSSPSKPKKGTLEQDPLA	KtCDEGssPSKPKKG
+	-1.04168	S	2		___1	14-3-3 domain binding motif;Calmodulin-dependent protein kinase II substrate motif;ERK1,2 kinase substrate motif;G protein-coupled receptor kinase 1 substrate motif;GSK-3, ERK1, ERK2, CDK5 substrate motif;PKA kinase substrate motif;PKC epsilon kinase substrate motif;PKC kinase substrate motif;WW domain binding motif	+	HTP							0.999999	0.00775509	86.898	55.609	86.898	1.652	7.98217	54534000	41444000	225	NaN	7.98217	F6ZKR0;D3Z734;D3Z733;Q9QXK2;E9Q392	225;404;425;485;532	F6ZKR0	F6ZKR0	E3 ubiquitin-protein ligase RAD18	Rad18	SDSDSCNRNDQNREVSPQQTRRTRASECVEI	NDQNREVsPQQTRRT
+	-1.04076	S	2		___2	14-3-3 domain binding motif;Calmodulin-dependent protein kinase II substrate motif;Casein kinase II substrate motif;G protein-coupled receptor kinase 1 substrate motif;GSK3 kinase substrate motif;PKA kinase substrate motif;PKC kinase substrate motif	+	HTP							1	4.2866e-05	78.95	74.955	44.998	0.46962	8.60324	140380000	260710000	1453	NaN	8.60324	Q8BTI8;Q8BTI8-2;Q8BTI8-3	1453;1357;1453	Q8BTI8	Q8BTI8	Serine/arginine repetitive matrix protein 2	Srrm2	SSPEPKALPQTPRARSHSPSSPERNNKSVTP	PQtPRARsHsPssPE
+	-1.02585	S	2		___1	Cdc2 kinase substrate motif;CDK kinase substrate motif;CDK1,2,4,6 kinase substrate motif;ERK1,2 kinase substrate motif;G protein-coupled receptor kinase 1 substrate motif;GSK3 kinase substrate motif;GSK-3, ERK1, ERK2, CDK5 substrate motif;WW domain binding motif	+	HTP							0.966612	4.16143e-07	115.12	99.957	105.03	-0.17501	7.9397	44732000	42306000	517	NaN	7.9397	Q3UII8;Q924K8;H3BIY7;H3BLE1	517;516;176;241	Q3UII8	Q3UII8	Metastasis-associated protein MTA3	Mta3	AIRAEYADRHAELSGSPLKSRSTRKPLSCII	RHAELsGsPLKSRST
+	-1.0226	S	2		___2	G protein-coupled receptor kinase 1 substrate motif;GSK3 kinase substrate motif;Phosphorylase kinase substrate motif;PKA kinase substrate motif;PKC kinase substrate motif	+	HTP							1	3.05164e-08	91.238	86.107	75.868	-0.1051	8.86908	278500000	461250000	103	NaN	8.86908	Q6P542;G3V012	103;8	Q6P542	Q6P542	ATP-binding cassette sub-family F member 1	Abcf1	DDSDERVLMERLKQLSVPASDEEDEVPAPIP	MERLKQLsVPAsDEE
+	-1.0226	S	2		___2	BARD1 BRCT domain binding motif;Casein kinase II substrate motif;MAPKAPK2 kinase substrate motif	+	HTP							1	7.81065e-16	125.11	106.53	75.868	-0.1051	9.31691	796800000	1277700000	107	NaN	9.31691	Q6P542;G3V012	107;12	Q6P542	Q6P542	ATP-binding cassette sub-family F member 1	Abcf1	ERVLMERLKQLSVPASDEEDEVPAPIPRGRK	KQLsVPAsDEEDEVP
+	-1.02254	S	3		___2	ERK1,2 kinase substrate motif;Growth associated histone HI kinase substrate motif;GSK-3, ERK1, ERK2, CDK5 substrate motif;MAPKAPK2 kinase substrate motif;PKA kinase substrate motif;PKC kinase substrate motif;WW domain binding motif									0.751475	2.28303e-18	89.391	89.391	89.391	-0.017762	8.90009	343360000	451140000	564	NaN	8.90009	E9Q740;F8VQC1	564;625	E9Q740	E9Q740	Signal recognition particle subunit SRP72	Srp72	SSELDASKAVSSPPTSPRPGSAATISSSASN
+	-1.01826	S	2		___1	ERK1,2 kinase substrate motif;G protein-coupled receptor kinase 1 substrate motif;Growth associated histone HI kinase substrate motif;GSK-3, ERK1, ERK2, CDK5 substrate motif;WW domain binding motif	+	HTP							1	0.000992901	79.885	54.078	79.885	0.43874	7.67437	23567000	23680000	336	NaN	7.67437	Q62523	336	Q62523	Q62523	Zyxin	Zyx	QHPQPPPAQNQNQVRSPGGPGPLTLKEVEEL	QNQNQVRsPGGPGPL
+	-1.00509	S	3		___1	Casein kinase II substrate motif;ERK1,2 kinase substrate motif;GSK-3, ERK1, ERK2, CDK5 substrate motif;WW domain binding motif	+	HTP							0.929618	4.3741e-05	62.696	51.27	58.712	-2.9191	7.86714	41920000	31726000	128	NaN	7.86714	F7A3Q3;F6ZEX4;E9Q9N6;E9PYX3;Q05512-3;Q05512-4;Q3T9A3;Q05512-2;Q05512;F6ZS70;E9QMP6;F6UY70;F7CVZ7;F7CRG8	128;146;512;512;512;512;533;564;566;557;566;54;103;59	F7A3Q3	F7A3Q3	Serine/threonine-protein kinase MARK2	Mark2	QNGKDSTAPQRVPVASPSAHNISSSSGAPDR	PQRVPVAsPsAHNIS
	-0.999394	S	3		___2	ERK1,2 kinase substrate motif;G protein-coupled receptor kinase 1 substrate motif;GSK3 kinase substrate motif;GSK-3, ERK1, ERK2, CDK5 substrate motif;WW domain binding motif	+	HTP							0.999999	1.2505e-14	103.58	103.58	91.767	0.12622	8.54584	165570000	185860000	143	NaN	8.54584	Q8CB87	143	Q8CB87	Q8CB87	Ras-related protein Rab-44	Rab44	SSIEAHSHRTLRLCWSPPPSPSSTSAPQTPR	RTLRLCWsPPPSPSS
	-0.999394	S	3		___2	Casein kinase II substrate motif;DNA dependent Protein kinase substrate motif;ERK1,2 kinase substrate motif;G protein-coupled receptor kinase 1 substrate motif;GSK-3, ERK1, ERK2, CDK5 substrate motif;MAPKAPK2 kinase substrate motif;WW domain binding motif									0.991515	3.03146e-08	91.767	88.661	91.767	0.12622	8.10401	69383000	57674000	147	NaN	8.10401	Q8CB87	147	Q8CB87	Q8CB87	Ras-related protein Rab-44	Rab44	AHSHRTLRLCWSPPPSPSSTSAPQTPRIVRQ
	-0.997866	S	2		___1	Cdc2 kinase substrate motif;CDK kinase substrate motif;CDK1,2,4,6 kinase substrate motif;CDK4 kinase substrate motif;ERK1,2 kinase substrate motif;Growth associated histone HI kinase substrate motif;GSK-3, ERK1, ERK2, CDK5 substrate motif;PKA kinase substrate motif;PKC kinase substrate motif;WW domain binding motif	+	HTP							0.999949	4.27639e-20	129.51	126.75	97.5	0.0064598	8.85425	358780000	356130000	971	NaN	8.85425	Q9ES52-2;Q9ES52;Q9ES52-5	971;972;709	Q9ES52-2	Q9ES52-2	Phosphatidylinositol 3,4,5-trisphosphate 5-phosphatase 1	Inpp5d	GRGEGPPTPPSQPPLSPKKFSSSTANRGPCP	PPsQPPLsPKKFsSS	PKACA
	-0.99404	S	2		___1	Casein kinase II substrate motif;Pyruvate dehydrogenase kinase substrate motif	+	HTP							1	3.09529e-13	121.72	111.35	121.72	-1.6389	8.03125	56243000	51213000	116	NaN	8.03125	E9Q616	116	E9Q616	E9Q616		Ahnak	WTHEVFSSRSSEVVLSGDDEDYQRIYTTKIK	RSsEVVLsGDDEDyQ
	-0.993494	S	3		___1	14-3-3 domain binding motif;Calmodulin-dependent protein kinase II substrate motif;Casein kinase II substrate motif;G protein-coupled receptor kinase 1 substrate motif;PKA kinase substrate motif;PKC kinase substrate motif	+	HTP							1	1.06858e-06	95.5	85.721	95.5	0.2645	7.84627	34512000	35677000	52	NaN	7.84627	D3Z6Z7;Q8C2K5;Q8C2K5-2	52;74;52	D3Z6Z7	D3Z6Z7	RAS protein activator like-3	Rasal3	GGFRWGRFAGWGRALSHQEPMVNSQPAPRSL	AGWGRALsHQEPMVN
	-0.987789	S	3		___1	14-3-3 domain binding motif;Calmodulin-dependent protein kinase II substrate motif;Calmodulin-dependent protein kinase IV substrate motif;Casein kinase II substrate motif;Chk1 kinase substrate motif;G protein-coupled receptor kinase 1 substrate motif;GSK3 kinase substrate motif;PKA kinase substrate motif;PKC kinase substrate motif;Pyruvate dehydrogenase kinase substrate motif	+	CST;HTP							1	1.55697e-07	91.416	88.399	49.266	-0.033557	8.55934	119240000	243290000	1572	NaN	8.55934	Q8BTI8;Q8BTI8-2;Q8BTI8-3	1572;1476;1572	Q8BTI8	Q8BTI8	Serine/arginine repetitive matrix protein 2	Srrm2	SPEMKDKPRVLQRAQSGTDSSPEHKIPAPRA	RVLQRAQsGtDssPE
	-0.986759	S	3		___1	14-3-3 domain binding motif;Calmodulin-dependent protein kinase II substrate motif;Calmodulin-dependent protein kinase IV substrate motif;Casein kinase II substrate motif;Chk1 kinase substrate motif;DNA dependent Protein kinase substrate motif;Pim1 kinase substrate sequence;PKA kinase substrate motif;PKA, PKG kinase substrate motif;PKC epsilon kinase substrate motif;PKC kinase substrate motif;PKG…	+	CST							0.999946	0.00246887	85.45	58.121	85.45	-0.4307	7.59127	18502000	20516000	7	NaN	7.59127	P57725	7	P57725	P57725	SAM domain-containing protein SAMSN-1	Samsn1	_________MLKRKPSNASDKEKHQKPKRSS	_MLKRKPsNAsDKEK
	-0.986073	S	2		___2	Casein kinase II substrate motif;G protein-coupled receptor kinase 1 substrate motif;GSK3 kinase substrate motif;Phosphorylase kinase substrate motif;PKA kinase substrate motif;PKC kinase substrate motif	+	HTP							0.97377	0.000520145	67.095	65.051	48.532	-0.12197	7.81046	30546000	34088000	67	NaN	7.81046	Q3U9G9	67	Q3U9G9	Q3U9G9	Lamin-B receptor	Lbr	SDIKPLKSFKQRKSGSISSSPSRRRGSRSRS	FKQRKsGsIsssPsR
	-0.984046	S	2		___1	Casein kinase II substrate motif;G protein-coupled receptor kinase 1 substrate motif;PKA kinase substrate motif	+	CST;HTP							1	3.49132e-44	174.2	171.13	162.39	0.82175	8.56975	166220000	205110000	1539	NaN	8.56975	Q64511	1539	Q64511	Q64511	DNA topoisomerase 2-beta	Top2b	PKGKGRGAKKRKASGSENEGDYNPGRKPSKT	KKRkAsGsENEGDYN
	-0.981594	T	2		___1	b-Adrenergic Receptor kinase substrate motif	+	HTP							0.83725	1.59848e-45	171.84	165.47	171.84	0.4836	9.1978	401710000	1175100000	4	NaN	9.1978	P43276	4	P43276	P43276	Histone H1.5	Hist1h1b	____________MSETAPAETAAPAPVEKSP	____MsEtAPAEtAA
	-0.981394	T	2		___1	Casein kinase II substrate motif;GSK-3, ERK1, ERK2, CDK5 substrate motif;RAF1 kinase substrate motif;WW domain binding motif	+	CST;HTP							1	2.76878e-23	142.4	134.27	116.04	-0.081235	8.67243	248210000	222160000	641	NaN	8.67243	P68404-2	641	P68404-2	P68404-2			AENFDRFFTRHPPVLTPPDQEVIRNIDQSEF	tRHPPVLtPPDQEVI
	-0.981252	S	2		___1	Casein kinase II substrate motif;G protein-coupled receptor kinase 1 substrate motif	+	HTP							0.961431	1.58107e-25	138.61	135.08	102.98	-0.39012	9.1697	694730000	783380000	2	NaN	9.1697	P43276	2	P43276	P43276	Histone H1.5	Hist1h1b	______________MSETAPAETAAPAPVEK	______MsEtAPAEt
	-0.976674	S	3		___1	14-3-3 domain binding motif;b-Adrenergic Receptor kinase substrate motif;Calmodulin-dependent protein kinase II substrate motif;Casein kinase II substrate motif;PAK2 kinase substrate motif;PKA kinase substrate motif;PKC epsilon kinase substrate motif;PKC kinase substrate motif	+	HTP							0.818975	0.00075622	60.157	55.253	60.157	-0.46921	7.31643	10481000	10240000	89	NaN	7.31643	Q8BFW4-2;Q8BFW4	89;89	Q8BFW4-2	Q8BFW4-2	Tripartite motif-containing protein 65	Trim65	LPVLPAPPAVTPRRDSATSHSARCLRHGRPL	AVTPRRDsATSHSAR
	-0.975312	S	3		___1	14-3-3 domain binding motif;Calmodulin-dependent protein kinase II substrate motif;G protein-coupled receptor kinase 1 substrate motif;MAPKAPK1 kinase substrate motif;PKA kinase substrate motif;PKC kinase substrate motif	+	CST;HTP							1	3.69151e-40	161.2	156.15	154.42	0.081694	8.90421	404740000	397330000	136	NaN	8.90421	E9Q616	136	E9Q616	E9Q616		Ahnak	DYQRIYTTKIKPRLRSEDGVEGDLGETQSRT	KIKPRLRsEDGVEGD
	-0.972365	S	2		___1	Casein kinase I substrate motif;Casein kinase II substrate motif;ERK1,2 kinase substrate motif;GSK-3, ERK1, ERK2, CDK5 substrate motif;Pyruvate dehydrogenase kinase substrate motif;WW domain binding motif	+	HTP							1	7.37921e-07	103.32	92.224	48.405	-0.36956	8.68588	223890000	261260000	902	NaN	8.68588	Q60875-5;H3BJU7;Q60875-4;H3BJX8;H3BJ45;H3BJ40;H3BKH9;Q60875	902;902;904;914;914;916;929;931	Q60875-5	Q60875-5	Rho guanine nucleotide exchange factor 2	Arhgef2	SLHRPFDDREAQELGSPEDRLQDSSDPDTGS	REAQELGsPEDRLQD
	-0.971827	S	2		___1	14-3-3 domain binding motif;b-Adrenergic Receptor kinase substrate motif;Calmodulin-dependent protein kinase II substrate motif;Casein kinase II substrate motif;ERK1,2 kinase substrate motif;G protein-coupled receptor kinase 1 substrate motif;GSK3 kinase substrate motif;GSK-3, ERK1, ERK2, CDK5 substrate motif;PKA kinase substrate motif;PKC kinase substrate motif;WW domain binding motif	+	HTP							0.999722	4.83473e-11	110.38	82.096	110.38	-0.082251	8.48096	149370000	153290000	226	NaN	8.48096	B7ZP47;Q65Z40	226;226	B7ZP47	B7ZP47	Wings apart-like protein homolog	Wapal	ETNDTWNSQSGKRTESPSESCPVKGSVRTGL	QSGkRtEsPsESCPV
	-0.971459	S	2		___2	14-3-3 domain binding motif;Calmodulin-dependent protein kinase II substrate motif;Casein kinase II substrate motif;PKA kinase substrate motif;PKC kinase substrate motif	+	CST;HTP							0.999478	5.82979e-121	241.65	237.6	240.71	0.21898	9.42118	1374000000	1263400000	497	NaN	9.42118	Q8BGD9	497	Q8BGD9	Q8BGD9	Eukaryotic translation initiation factor 4B	Eif4b	NAWVKRSSNPPARSQSSDTEQPSPTSGGGKV	NPPARsQssDtEQPs
	-0.971431	S	2		___1	b-Adrenergic Receptor kinase substrate motif;Casein kinase I substrate motif;Casein kinase II substrate motif;G protein-coupled receptor kinase 1 substrate motif;GSK3 kinase substrate motif;PKA kinase substrate motif;PKC kinase substrate motif	+	HTP							1	5.30941e-89	223.46	217.75	149.52	-0.65515	8.94856	391930000	496370000	14	NaN	8.94856	P62996;P62996-2	14;14	P62996	P62996	Transformer-2 protein homolog beta	Tra2b	__MSDSGEQNYGERESRSASRSGSAHGSGKS	QNYGEREsRsAsRSG
	-0.969113	S	3		___1	Casein kinase II substrate motif;G protein-coupled receptor kinase 1 substrate motif;PKA kinase substrate motif	+	HTP							1	2.489e-09	102.98	102.98	97.256	0.7826	8.33409	97786000	118030000	397	NaN	8.33409	P51612	397	P51612	P51612	DNA repair protein complementing XP-C cells homolog	Xpc	GTGTAGSRQRRKPSCSEGEEAEQKVQGRPHA	QRRKPsCsEGEEAEQ
	-0.965559	S	3		___2	14-3-3 domain binding motif;Akt kinase substrate motif;Calmodulin-dependent protein kinase II substrate motif;Casein kinase II substrate motif;ERK1,2 kinase substrate motif;G protein-coupled receptor kinase 1 substrate motif;GSK3 kinase substrate motif;GSK-3, ERK1, ERK2, CDK5 substrate motif;MAPKAPK1 kinase substrate motif;MDC1 BRCT domain binding motif;PKA kinase substrate motif;PKC kinase subst…	+	HTP							0.925179	0.000856303	64.705	60.207	64.705	-0.59643	7.36271	7077500	15975000	735	NaN	7.36271	A2A7B5	735	A2A7B5	A2A7B5		Prdm2	SMLAVTSSRFKRRTSSPPSSPQHSPALRDFG	RFKRRtssPPssPQH
	-0.965559	S	3		___2	ERK1,2 kinase substrate motif;G protein-coupled receptor kinase 1 substrate motif;GSK3 kinase substrate motif;GSK-3, ERK1, ERK2, CDK5 substrate motif;MAPKAPK2 kinase substrate motif;MDC1 BRCT domain binding motif;Plk1 PBD domain binding motif;WW domain binding motif	+	HTP							0.767627	0.000856303	64.705	60.207	64.705	-0.59643	7.36271	7077500	15975000	739	NaN	7.36271	A2A7B5	739	A2A7B5	A2A7B5		Prdm2	VTSSRFKRRTSSPPSSPQHSPALRDFGKQSD	RtssPPssPQHsPAL
	-0.964714	S	2		___3	Casein kinase II substrate motif;PKA kinase substrate motif;PKC kinase substrate motif	+	HTP							0.999999	0.000439007	70.345	56.239	70.345	0.85701	7.20653	6378600	9709900	1289	NaN	7.20653	Q8BZN6;E9QM99;Q8BZN6-2;Q8BZN6-3	1289;1289;1289;1289	Q8BZN6	Q8BZN6	Dedicator of cytokinesis protein 10	Dock10	SSIAISTVNHADSRASLASLDSNPSTTEKSS	NHADSRAsLAsLDsN
	-0.964714	S	2		___3	Casein kinase II substrate motif	+	HTP							0.999977	4.10344e-14	116.94	104.05	70.345	0.85701	8.08472	51415000	70121000	1292	NaN	8.08472	Q8BZN6;E9QM99;Q8BZN6-2;Q8BZN6-3	1292;1292;1292;1292	Q8BZN6	Q8BZN6	Dedicator of cytokinesis protein 10	Dock10	AISTVNHADSRASLASLDSNPSTTEKSSEKT	DSRAsLAsLDsNPST
	-0.964714	S	2		___3	b-Adrenergic Receptor kinase substrate motif;Casein kinase II substrate motif;G protein-coupled receptor kinase 1 substrate motif	+	HTP							0.999163	4.10344e-14	116.94	104.05	112.36	1.2944	8.08472	51415000	70121000	1295	NaN	8.08472	Q8BZN6;E9QM99;Q8BZN6-2;Q8BZN6-3	1295;1295;1295;1295	Q8BZN6	Q8BZN6	Dedicator of cytokinesis protein 10	Dock10	TVNHADSRASLASLDSNPSTTEKSSEKTDNC	AsLAsLDsNPSTTEK
	-0.964489	Y	2	+	___1	ALK kinase substrate motif;Cbl PTB domain binding motif;EGFR kinase substrate motif;Src kinase substrate motif;TC-PTP phosphatase substrate motif	+	CST;HTP;LTP	+	enzymatic activity, induced;activity, induced; molecular association, regulation; enzymatic activity, induced	cell differentiation, altered; cytoskeletal reorganization	Grb2(INDUCES)		represses osteoblast differentiation; required for normal organization of actin cytoskeleton and for bone resorption.	0.995507	2.66173e-16	148.32	148.32	124.33	0.031187	8.80338	554510000	81384000	365	8.79162	7.23019	D3YZ57;P39688-2;P39688;Q04736;Q80XU2;P05480;P06240;E9Q696	365;417;420;424;418;424;394;405	D3YZ57	D3YZ57	Tyrosine-protein kinase Fyn;Tyrosine-protein kinase Yes;Neuronal proto-oncogene tyrosine-protein kinase Src;Proto-oncogene tyrosine-protein kinase LCK	Fyn;Yes1;Src;Lck	KIADFGLARLIEDNEYTARQGAKFPIKWTAP	RLIEDNEytARQGAK	Src
	-0.961564	S	2		___1	Casein kinase I substrate motif;Casein kinase II substrate motif	+	CST;HTP							1	2.29605e-06	106.26	95.5	55.98	-0.19853	8.16146	62619000	82413000	705	NaN	8.16146	Q8BGC0	705	Q8BGC0	Q8BGC0	HIV Tat-specific factor 1 homolog	Htatsf1	GKKDDDASDKVFEDNSNEKLFDEEEGPNEKL	DKVFEDNsNEKLFDE
	-0.95316	S	3		___1	14-3-3 domain binding motif;Calmodulin-dependent protein kinase II substrate motif;Calmodulin-dependent protein kinase IV substrate motif;Casein kinase II substrate motif;Chk1 kinase substrate motif;Pim1 kinase substrate sequence;PKA kinase substrate motif;PKC epsilon kinase substrate motif;PKC kinase substrate motif;Pyruvate dehydrogenase kinase substrate motif	+	CST							0.999613	0.00247872	48.568	42.382	48.568	-0.49695	7.67905	24069000	23690000	444	NaN	7.67905	Q60953-2;Q60953;F7BTZ2;D3Z3A6;D3YXR5	444;490;436;490;490	Q60953-2	Q60953-2	Protein PML	Pml	EQEASQTVGSMKRKCSHEDCSRKIIKMESTE	GSMkRKCsHEDCSRK
	-0.951038	S	2		___2	Casein kinase II substrate motif;MDC1 BRCT domain binding motif;Plk1 PBD domain binding motif	+	CST;HTP							0.999817	8.43273e-30	143.48	143.48	143.48	-0.73866	8.74576	206550000	350330000	498	NaN	8.74576	Q8BGD9	498	Q8BGD9	Q8BGD9	Eukaryotic translation initiation factor 4B	Eif4b	AWVKRSSNPPARSQSSDTEQPSPTSGGGKVA	PPARsQssDtEQPsP
	-0.950174	S	2		___1	Cdc2 kinase substrate motif;CDK kinase substrate motif;CDK1,2,4,6 kinase substrate motif;ERK1,2 kinase substrate motif;GSK-3, ERK1, ERK2, CDK5 substrate motif;MAPKAPK2 kinase substrate motif;WW domain binding motif	+	CST;HTP							0.999851	0.000117895	77.051	72.223	75.445	-0.61399	8.09036	69968000	53158000	595	NaN	8.09036	Q3UW53	595	Q3UW53	Q3UW53	Protein Niban	Fam129a	SSLTDLKTAMGSNQASPARRVSAILPGAPDN	AMGsNQAsPARRVsA
	-0.94636	S	2		___1	ERK1,2 kinase substrate motif;G protein-coupled receptor kinase 1 substrate motif;GSK3 kinase substrate motif;GSK-3, ERK1, ERK2, CDK5 substrate motif;MAPKAPK2 kinase substrate motif;WW domain binding motif	+	HTP							0.823479	0.000928325	42.249	42.249	42.249	-1.174	7.32644	6246800	14958000	1728	NaN	7.32644	Q6A099;Q6DFZ1	1728;1786	Q6A099	Q6A099		Gbf1	EKPESTRAPSSSSPGSPMASSPSKLSPAQEG	PSSsSPGsPMASSPS
	-0.941116	T	3		___1	Cdc2 kinase substrate motif;CDK1,2,4,6 kinase substrate motif;G protein-coupled receptor kinase 1 substrate motif;GSK-3, ERK1, ERK2, CDK5 substrate motif;PKA kinase substrate motif;PKC kinase substrate motif;WW domain binding motif	+	HTP							0.996533	0.000402882	62.525	58.729	58.98	4.0618	7.85815	36753000	35382000	464	NaN	7.85815	P42567-2;F6W2Q5;P42567;H3BK65	464;646;779;815	P42567-2	P42567-2	Epidermal growth factor receptor substrate 15	Eps15	SKSEDVPPALPPKVGTPTRPCPPPPGKRPIN	ALPPKVGtPtRPCPP
	-0.939648	S	2		___1	14-3-3 domain binding motif;Akt kinase substrate motif;Calmodulin-dependent protein kinase II substrate motif;ERK1,2 kinase substrate motif;GSK-3, ERK1, ERK2, CDK5 substrate motif;MAPKAPK1 kinase substrate motif;PKA kinase substrate motif;PKC kinase substrate motif;WW domain binding motif	+	HTP							1	0.000550445	93.345	81.576	74.611	-0.091994	7.52914	20551000	13266000	321	NaN	7.52914	D6RG95;E9Q5K9-3;E9Q5K9-2;E9Q5K9	321;309;309;309	D6RG95	D6RG95		Ythdc1	GSDEKKKERKRARGISPIVFDRSGSSASESY	RKRARGIsPIVFDRs
	-0.935724	T	3		___2	Growth associated histone HI kinase substrate motif;GSK-3, ERK1, ERK2, CDK5 substrate motif;MAPKAPK2 kinase substrate motif;PKA kinase substrate motif;PKC kinase substrate motif;WW domain binding motif	+	HTP							0.999997	2.18915e-05	63.979	63.979	63.979	-0.98701	7.17995	5644600	9489300	202	NaN	7.17995	Q80XU3	202	Q80XU3	Q80XU3	Nuclear ubiquitous casein and cyclin-dependent kinase substrate 1	Nucks1	AKVGRPTASKKSKEKTPSPKEEDEEAESPPE	SkKSKEKtPsPKEED
	-0.934869	S	3		___1	b-Adrenergic Receptor kinase substrate motif;BARD1 BRCT domain binding motif;Casein kinase II substrate motif	+	CST;HTP							1	5.27944e-23	117.53	111.79	117.53	0.14952	8.35102	90839000	133570000	191	NaN	8.35102	E9QP49;Q99MS7-4;Q99MS7-5;G5E8Y6;Q99MS7-3;Q99MS7-2;Q99MS7	191;191;191;191;191;191;191	E9QP49	E9QP49	EH domain-binding protein 1-like protein 1	Ehbp1l1	SVKPSDVGNLDDFAESDEEEANGPGAPEVRT	NLDDFAEsDEEEANG
	-0.934731	S	3		___1	ERK1,2 kinase substrate motif;GSK-3, ERK1, ERK2, CDK5 substrate motif;PKA kinase substrate motif;PKC kinase substrate motif;WW domain binding motif	+	HTP							0.999992	6.03638e-22	133.47	127.83	133.47	0.66482	8.69063	240170000	250330000	733	NaN	8.69063	Q8VBW5-2;Q8VBW5-3;Q8VBW5	733;791;811	Q8VBW5-2	Q8VBW5-2	HMG box transcription factor BBX	Bbx	KTKITHLVRTADGRVSPAGGTLDDKPKEQLQ	RtADGRVsPAGGtLD
	-0.933077	T	3		___1	b-Adrenergic Receptor kinase substrate motif;Casein kinase II substrate motif;GSK-3, ERK1, ERK2, CDK5 substrate motif;WW domain binding motif	+	HTP							0.946046	4.40912e-22	112.64	112.64	112.64	-0.094687	8.65724	206950000	247240000	378	NaN	8.65724	P15702	378	P15702	P15702	Leukosialin	Spn	GEEEPLVGSEDEAVETPTSDGPQAKDEAAPQ	sEDEAVEtPTSDGPQ
	-0.921418	S	3		___1	Casein kinase I substrate motif;Casein kinase II substrate motif;ERK1,2 kinase substrate motif;G protein-coupled receptor kinase 1 substrate motif;GSK-3, ERK1, ERK2, CDK5 substrate motif;WW domain binding motif	+	HTP							0.977726	8.87201e-13	83.332	76.7	83.332	0.80688	8.55173	190780000	165440000	1020	NaN	8.55173	E9Q449;A6H8H2;A6H8H2-2	1020;971;1020	E9Q449	E9Q449	DENN domain-containing protein 4C	Dennd4c	SAIVSKHLQPTPEPQSPTEPPAWGSSIVKVP	QPtPEPQsPtEPPAW
	-0.910773	S	3		___1	Casein kinase II substrate motif;ERK1,2 kinase substrate motif;Growth associated histone HI kinase substrate motif;GSK-3, ERK1, ERK2, CDK5 substrate motif;PKA kinase substrate motif;PKC kinase substrate motif;WW domain binding motif	+	CST;HTP							0.958645	1.15238e-37	144.78	144.78	144.78	0.30665	8.44919	131980000	149330000	192	NaN	8.44919	Q8K2F8	192	Q8K2F8	Q8K2F8	Protein LSM14 homolog A	Lsm14a	LAQGRSSPQLDPLRKSPTMEQAVQTASAHLP	QLDPLRKsPtMEQAV
	-0.90212	S	3		___1	14-3-3 domain binding motif;AMP-activated protein kinase substrate motif;Calmodulin-dependent protein kinase I substrate motif;Calmodulin-dependent protein kinase II substrate motif;Calmodulin-dependent protein kinase IV substrate motif;Chk1 kinase substrate motif;PKA kinase substrate motif;PKC kinase substrate motif	+	HTP							0.999957	3.47274e-36	155.24	155.24	128.38	-0.51913	8.70246	237720000	266310000	294	NaN	8.70246	Q8BKC8-2	294	Q8BKC8-2	Q8BKC8-2	Phosphatidylinositol 4-kinase beta	Pi4kb	ATASISLSSNLKRTASNPKVENEDEPVRLAP	SNLKRTAsNPKVENE
	-0.896845	S	3		___1	14-3-3 domain binding motif;Akt kinase substrate motif;Calmodulin-dependent protein kinase II substrate motif;MAPKAPK1 kinase substrate motif;PKA kinase substrate motif;PKC epsilon kinase substrate motif;PKC kinase substrate motif	+	CST;HTP							0.991104	7.45227e-06	58.294	51.791	54.958	0.5987	7.36609	11531000	11701000	36	NaN	7.36609	Q9D0V7	36	Q9D0V7	Q9D0V7	Receptor-binding cancer antigen expressed on SiSo cells	Ebag9	FLKRLICRSGRGRKLSGDQITLPTTVDYSSV	SGRGRKLsGDQItLP
	-0.891081	S	3		___1	b-Adrenergic Receptor kinase substrate motif;Casein kinase II substrate motif;Cdc2 kinase substrate motif;CDK kinase substrate motif;CDK1,2,4,6 kinase substrate motif;ERK1,2 kinase substrate motif;G protein-coupled receptor kinase 1 substrate motif;GSK-3, ERK1, ERK2, CDK5 substrate motif;PKA kinase substrate motif;WW domain binding motif	+	CST;HTP							1	3.91347e-18	123.55	109.28	77.871	1.0946	8.2663	87163000	97463000	203	NaN	8.2663	P09411;S4R2M7	203;203	P09411	P09411	Phosphoglycerate kinase 1	Pgk1	FLMKKELNYFAKALESPERPFLAILGGAKVA	yFAkALEsPERPFLA
	-0.889236	T	3		___1	Casein kinase II substrate motif;ERK1,2 kinase substrate motif;G protein-coupled receptor kinase 1 substrate motif;Growth associated histone HI kinase substrate motif;GSK3, Erk1, Erk2 and CDK5 kinase motif;GSK-3, ERK1, ERK2, CDK5 substrate motif;WW domain binding motif	+	CST;HTP							0.906932	1.393e-37	139.85	139.85	58.349	-0.061641	8.54239	156330000	192320000	21	NaN	8.54239	F6TVP2;E9Q0K6;Q60710;F8WJE0;E9PYG9;E0CXZ5	32;52;21;52;52;21	F6TVP2;Q60710	Q60710	Deoxynucleoside triphosphate triphosphohydrolase SAMHD1	Samhd1	LEQPAKRPRCDGSPRTPPSTPPATANLSADD	RCDGsPRtPPstPPA
	-0.888595	S	4		___1	ERK1,2 kinase substrate motif;G protein-coupled receptor kinase 1 substrate motif;GSK-3, ERK1, ERK2, CDK5 substrate motif;WW domain binding motif	+	HTP;LTP	+	molecular association, regulation		Pin1(INDUCES)			0.895191	1.45746e-05	55.977	46.943	55.977	-1.0276	7.75102	32528000	23839000	194	NaN	7.75102	Q8BUV3;A0JNY3	194;194	Q8BUV3	Q8BUV3	Gephyrin;Molybdopterin adenylyltransferase;Molybdopterin molybdenumtransferase	Gphn	VHDELEDLPSPPPPLSPPPTTSPHKQTEDKG	PsPPPPLsPPPttsP
	-0.887287	S	2		___1	Casein kinase II substrate motif;G protein-coupled receptor kinase 1 substrate motif;GSK3 kinase substrate motif;Phosphorylase kinase substrate motif;PKA kinase substrate motif;PKC kinase substrate motif	+	HTP							0.97377	0.000520145	67.095	65.051	48.532	-0.12197	7.81046	30546000	34088000	67	NaN	7.81046	Q3U9G9	67	Q3U9G9	Q3U9G9	Lamin-B receptor	Lbr	SDIKPLKSFKQRKSGSISSSPSRRRGSRSRS	FKQRKsGsIsssPsR
	-0.881188	S	2		___1	b-Adrenergic Receptor kinase substrate motif	+	HTP							0.999568	1.32308e-37	176.23	176.23	176.23	0.90526	8.21982	73865000	92020000	1565	NaN	8.21982	Q6PR54-2;Q6PR54;Q6PR54-3	1565;1565;1572	Q6PR54-2	Q6PR54-2	Telomere-associated protein RIF1	Rif1	SRKKRSGKWKNRSSDSVDIEEQEEKKAEEEV	WKNRssDsVDIEEQE
	-0.87917	S	2		___1	14-3-3 domain binding motif;Calmodulin-dependent protein kinase II substrate motif;ERK1,2 kinase substrate motif;Growth associated histone HI kinase substrate motif;GSK-3, ERK1, ERK2, CDK5 substrate motif;PKA kinase substrate motif;PKC kinase substrate motif;WW domain binding motif									0.997308	0.00185953	79.886	63.113	79.886	0.54657	7.39568	14183000	10686000	1429	NaN	7.39568	Q56A10	1429	Q56A10	Q56A10	Zinc finger protein 608	Znf608	ALDLLQHHANQYRSKSPAPVEKASTEREREA
	-0.874561	S	2		___1	DNA dependent Protein kinase substrate motif;ERK1,2 kinase substrate motif;GSK-3, ERK1, ERK2, CDK5 substrate motif;PKA kinase substrate motif;PKC kinase substrate motif;WW domain binding motif	+	CST;HTP							0.99847	5.20918e-29	141.64	137.09	141.64	0.4777	8.7961	352090000	273220000	267	NaN	8.7961	O08539-2;Q6P1B9;O08539	267;267;298	O08539-2	O08539-2	Myc box-dependent-interacting protein 1	Bin1	AQPSDNAPEKGNKSPSPPPDGSPAATPEIRV	EKGNKsPsPPPDGsP
	-0.867963	S	2		___1	14-3-3 domain binding motif;AMP-activated protein kinase substrate motif;Calmodulin-dependent protein kinase I substrate motif;Calmodulin-dependent protein kinase II substrate motif;Calmodulin-dependent protein kinase IV substrate motif;Casein kinase II substrate motif;Chk1 kinase substrate motif;PKA kinase substrate motif;PKC kinase substrate motif	+	CST;HTP							0.999891	7.07422e-18	153	153	153	-0.081958	8.79665	335580000	290530000	296	NaN	8.79665	Q80TY0-2;A2AQ43;A2AQ44;A2AQ42;A2AQ45;A2AQ41;Q80TY0;Q80TY0-4;Q80TY0-3;Q80TY0-5	296;296;296;296;296;296;296;217;296;296	Q80TY0-2	Q80TY0-2	Formin-binding protein 1	Fnbp1	DIEFEDYTQPMKRTVSDNSLSSSKEGKPELR	QPMKRtVsDNsLsss
	-0.866068	S	3		___2	Casein kinase II substrate motif;MDC1 BRCT domain binding motif;PAK2 kinase substrate motif;PKA kinase substrate motif;PKC kinase substrate motif;Plk1 PBD domain binding motif	+	HTP							0.975594	1.52534e-08	114.55	103.69	114.55	0.27247	8.15728	49974000	93666000	239	NaN	8.15728	B2RXW8;B2RXQ2	239;239	B2RXW8	B2RXW8		Ppfia1	NHEQESAPSTNGKRSSDGSLSHEDLAKVLEL	STNGKRssDGsLsHE
	-0.863152	S	2		___1	Casein kinase II substrate motif	+	CST;HTP							1	1.23519e-21	132.86	123.08	110.26	-0.9157	8.84509	258290000	441680000	343	NaN	8.84509	Q8C1D8-2;Q8C1D8	343;343	Q8C1D8-2	Q8C1D8-2	Protein IWS1 homolog	Iws1	EGDEEKVAKRKAAVLSDSEDDAGNASAKKSR	KRKAAVLsDsEDDAG
	-0.862837	S	2		___2	Cdc2 kinase substrate motif;CDK kinase substrate motif;CDK1,2,4,6 kinase substrate motif;CDK4 kinase substrate motif;ERK1,2 kinase substrate motif;Growth associated histone HI kinase substrate motif;GSK-3, ERK1, ERK2, CDK5 substrate motif;PKA kinase substrate motif;PKC kinase substrate motif;WW domain binding motif	+	HTP							0.999949	4.27639e-20	129.51	126.75	97.5	0.0064598	8.85425	358780000	356130000	971	NaN	8.85425	Q9ES52-2;Q9ES52;Q9ES52-5	971;972;709	Q9ES52-2	Q9ES52-2	Phosphatidylinositol 3,4,5-trisphosphate 5-phosphatase 1	Inpp5d	GRGEGPPTPPSQPPLSPKKFSSSTANRGPCP	PPsQPPLsPKKFsSS	PKACA
	-0.862837	T	2		___2	Casein kinase II substrate motif;DNA dependent Protein kinase substrate motif;ERK1,2 kinase substrate motif;GSK3, Erk1, Erk2 and CDK5 kinase motif;GSK-3, ERK1, ERK2, CDK5 substrate motif;WW domain binding motif	+	HTP							0.999998	3.70699e-13	129.07	118.57	129.07	0.00098089	8.14566	54778000	85068000	963	NaN	8.14566	Q9ES52-2;Q9ES52;Q9ES52-5	963;964;701	Q9ES52-2	Q9ES52-2	Phosphatidylinositol 3,4,5-trisphosphate 5-phosphatase 1	Inpp5d	PKDSSLGPGRGEGPPTPPSQPPLSPKKFSSS	GRGEGPPtPPsQPPL	PKACA
	-0.857312	S	2		___1	14-3-3 domain binding motif;Calmodulin-dependent protein kinase II substrate motif;PAK2 kinase substrate motif;PKA kinase substrate motif;PKC epsilon kinase substrate motif;PKC kinase substrate motif									1	0.0223632	48.423	25.37	48.423	0.43018	7.8805	37725000	38221000	56	NaN	7.8805	F7AHX3	56	F7AHX3	F7AHX3		6530403G13Rik	THIKTCISRGPFRRNSGGIRELRNLQAGGTS
	-0.856633	Y	3	+	___1	TC-PTP phosphatase substrate motif	+	CST;HTP;LTP	+	molecular association, regulation; enzymatic activity, induced	transcription, altered	PKCZ(INDUCES)			0.999994	3.86647e-138	281.32	264.28	189.24	0.068248	10.5296	12067000000	21787000000	106	10.4987	9.36648	P47811-4;P47811;P47811-3;P47811-2;B2KF35;B2KF34	106;182;182;182;182;182	P47811-4	P47811-4	Mitogen-activated protein kinase 14	Mapk14	LDFGLARHTDDEMTGYVATRWYRAPEIMLNW	tDDEMtGyVAtRWYR	P38A;MKK6
	-0.855771	S	2		___1	14-3-3 domain binding motif;ATM kinase substrate motif;Calmodulin-dependent protein kinase II substrate motif;Calmodulin-dependent protein kinase IV substrate motif;Casein kinase II substrate motif;Chk1 kinase substrate motif;DNA dependent Protein kinase substrate motif;PAK2 kinase substrate motif;PKA kinase substrate motif;PKC epsilon kinase substrate motif;PKC kinase substrate motif	+	HTP							1	0.00277026	96.665	33.131	71.524	0.35812	8.45638	139990000	146010000	520	NaN	8.45638	Q8VBT6	520	Q8VBT6	Q8VBT6	Apolipoprotein B receptor	Apobr	LEAWGNWSRGVDRRNSQEVKADAEAGKEQTA	RGVDRRNsQEVKADA
	-0.855692	S	4		___1	b-Adrenergic Receptor kinase substrate motif;Casein kinase II substrate motif;G protein-coupled receptor kinase 1 substrate motif;MAPKAPK2 kinase substrate motif									0.834885	1.66574e-06	82.609	82.609	82.609	1.3222	7.66172	27133000	18758000	33	NaN	7.66172	F6YB25	33	F6YB25	F6YB25		Rprd1b	YGGEFIQQLKLSMEDSKSPPPKAEEKKSLKR
	-0.854205	S	2		___1	Cdc2 kinase substrate motif;CDK kinase substrate motif;CDK1,2,4,6 kinase substrate motif;ERK1,2 kinase substrate motif;GSK-3, ERK1, ERK2, CDK5 substrate motif;WW domain binding motif	+	CST;HTP							1	4.73854e-09	127.02	127.02	63.16	0.79005	9.36152	1147600000	1151300000	17	NaN	9.36152	Q60953-2;Q60953;F7BTZ2;D3Z3A6;D3YXR5;D6RII9;F6XUT1	17;17;9;17;17;17;7	Q60953-2	Q60953-2	Protein PML	Pml	ETEPVSVQKVPAPPGSPCRQQDSALTPTPTM	KVPAPPGsPCRQQDS
	-0.853423	S	2		___1	14-3-3 domain binding motif;Calmodulin-dependent protein kinase I substrate motif;Calmodulin-dependent protein kinase II substrate motif;Calmodulin-dependent protein kinase IV substrate motif;Casein kinase II substrate motif;Chk1 kinase substrate motif;G protein-coupled receptor kinase 1 substrate motif;PKA kinase substrate motif;PKC kinase substrate motif	+	CST;HTP							0.999929	0.000155767	97.734	60.554	97.734	0.46589	8.12988	69943000	64912000	580	NaN	8.12988	P04627;B1AUP0;Q99N57;Q99N57-2	580;179;621;641	P04627	P04627	Serine/threonine-protein kinase A-Raf;RAF proto-oncogene serine/threonine-protein kinase	Araf;Raf1	IELLQRSLPKIERSASEPSLHRTQADELPAC	PKIERsAsEPsLHRT
	-0.852146	S	3		___2	DNA dependent Protein kinase substrate motif;ERK1,2 kinase substrate motif;G protein-coupled receptor kinase 1 substrate motif;GSK3 kinase substrate motif;GSK-3, ERK1, ERK2, CDK5 substrate motif;WW domain binding motif	+	CST;HTP							0.99945	1.83798e-17	107.04	107.04	69.551	-0.063815	8.88518	375000000	392680000	787	NaN	8.88518	E9PUK6;E9QKA4;A2A8V9;Q52KI8;A2A8V8;Q52KI8-2;F6UK16	787;787;782;810;773;787;217	E9PUK6	E9PUK6	Serine/arginine repetitive matrix protein 1	Srrm1	SGSPEPAAKKPPAPPSPVQSQSPSTNWSPAV	KKPPAPPsPVQsQsP
	-0.852146	S	3		___2	Casein kinase II substrate motif;ERK1,2 kinase substrate motif;GSK-3, ERK1, ERK2, CDK5 substrate motif;WW domain binding motif	+	CST;HTP							0.996732	1.83798e-17	107.04	107.04	107.04	-0.50242	8.88518	375000000	392680000	793	NaN	8.88518	E9PUK6;E9QKA4;A2A8V9;Q52KI8;A2A8V8;Q52KI8-2;F6UK16	793;793;788;816;779;793;223	E9PUK6	E9PUK6	Serine/arginine repetitive matrix protein 1	Srrm1	AAKKPPAPPSPVQSQSPSTNWSPAVPAKKAK	PsPVQsQsPstNWsP
	-0.849128	S	3		___1	14-3-3 domain binding motif;Calmodulin-dependent protein kinase II substrate motif;Phosphorylase kinase substrate motif;Pim1 kinase substrate sequence;PKA kinase substrate motif;PKC epsilon kinase substrate motif;PKC kinase substrate motif	+	HTP							0.999851	3.84819e-09	97.081	97.081	97.081	0.1212	8.11008	54419000	74429000	289	NaN	8.11008	Q6NZF1	289	Q6NZF1	Q6NZF1	Zinc finger CCCH domain-containing protein 11A	Zc3h11a	LVRLSLSERLGKRKLSVGGDSDPPLKRSLAQ	RLGKRKLsVGGDsDP
	-0.848895	S	2		___1	DNA dependent Protein kinase substrate motif;ERK1,2 kinase substrate motif;G protein-coupled receptor kinase 1 substrate motif;GSK-3, ERK1, ERK2, CDK5 substrate motif;MAPKAPK2 kinase substrate motif;WW domain binding motif	+	HTP							0.99972	3.62477e-05	81.327	81.327	55.437	-0.69688	8.53695	158520000	185790000	38	NaN	8.53695	Q3U1Z5;G3UZQ1	38;38	Q3U1Z5	Q3U1Z5	G-protein-signaling modulator 3	Gpsm3	PPVNATARPWRSAPPSPPPPGTRHTALGPRS	PWRsAPPsPPPPGtR
	-0.845443	S	3		___1	14-3-3 domain binding motif;Aurora-A kinase substrate motif;Calmodulin-dependent protein kinase II substrate motif;Casein kinase II substrate motif;MAPKAPK2 kinase substrate motif;PAK2 kinase substrate motif;Phosphorylase kinase substrate motif;PKA kinase substrate motif;PKC epsilon kinase substrate motif;PKC kinase substrate motif	+	CST;HTP							0.906048	2.88757e-35	112.94	112.94	112.94	-1.7205	8.60908	186530000	219980000	1091	NaN	8.60908	Q6P9Q6;Q6P9Q6-2	1091;1091	Q6P9Q6	Q6P9Q6	FK506-binding protein 15	Fkbp15	EVATDGLLQGNSRRLSLTPDPEKGEPPALDP	QGNSRRLsLtPDPEK
	-0.844199	S	3		___1	Casein kinase II substrate motif;ERK1,2 kinase substrate motif;GSK-3, ERK1, ERK2, CDK5 substrate motif;MDC1 BRCT domain binding motif;PKA kinase substrate motif;PKC kinase substrate motif;Plk1 PBD domain binding motif;WW domain binding motif	+	HTP							0.88565	0.00233392	41.838	31.65	41.838	-2.4757	7.21346	8720900	7627500	1272	NaN	7.21346	Q80X82;F8WJD4	1272;1276	Q80X82	Q80X82	Symplekin	Sympk	PQNLSHAVEEALKTSSPETREPESKGNS___	EEALKtSsPEtREPE
	-0.840345	S	3		___1	14-3-3 domain binding motif;Calmodulin-dependent protein kinase II substrate motif;Casein kinase II substrate motif;MAPKAPK2 kinase substrate motif;PKA kinase substrate motif;PKC kinase substrate motif	+	CST;HTP							0.807357	0.000428885	66.989	66.989	66.989	-0.12778	7.34887	10083000	12246000	364	NaN	7.34887	Q62433	364	Q62433	Q62433	Protein NDRG1	Ndrg1	GPRSRSHTSEGSRSRSHTSEDARLNITPNSG	sEGsRsRsHtsEDAR
	-0.839932	S	2		___1	14-3-3 domain binding motif;Akt kinase substrate motif;Calmodulin-dependent protein kinase II substrate motif;Casein kinase II substrate motif;G protein-coupled receptor kinase 1 substrate motif;MAPKAPK1 kinase substrate motif;PKA kinase substrate motif;PKC kinase substrate motif;ZIP kinase substrate motif	+	HTP							0.849724	0.0622413	53.775	53.775	53.775	0.76507	7.01136	5489400	4775900	250	NaN	7.01136	Q8BTI8;Q8BTI8-2;Q8BTI8-3	250;154;250	Q8BTI8	Q8BTI8	Serine/arginine repetitive matrix protein 2	Srrm2	KSKRKSKDKKRKRSRSTTPAPKSRRAHRSTS	KKRKRsRsttPAPKS
	-0.824009	S	2		___1	PKA kinase substrate motif;PKC kinase substrate motif									1	8.61627e-08	107.69	107.69	85.909	-0.58246	8.59807	215420000	180920000	2	NaN	8.59807	P20065-2;P20065	2;8	P20065-2	P20065-2	Thymosin beta-4;Hematopoietic system regulatory peptide	Tmsb4x	______________MSDKPDMAEIEKFDKSK
	-0.82332	S	2		___2	ERK1,2 kinase substrate motif;G protein-coupled receptor kinase 1 substrate motif;GSK3 kinase substrate motif;GSK-3, ERK1, ERK2, CDK5 substrate motif;PKA kinase substrate motif;PKC kinase substrate motif;WW domain binding motif	+	CST;HTP							1	3.5626e-08	108.66	103.52	108.66	0.074556	9.54088	1422500000	2051800000	777	NaN	9.54088	E9PUI4;Q8VDP3-3;Q8VDP3;Q8VDP3-2	777;777;777;704	E9PUI4	E9PUI4	Protein-methionine sulfoxide oxidase MICAL1	Mical1	SNMQPDPSSPPVTRVSPVPSPSQPARRLIRL	SPPVTRVsPVPsPsQ
	-0.82332	S	2		___2	Casein kinase II substrate motif;DNA dependent Protein kinase substrate motif;ERK1,2 kinase substrate motif;G protein-coupled receptor kinase 1 substrate motif;GSK-3, ERK1, ERK2, CDK5 substrate motif;MAPKAPK2 kinase substrate motif;WW domain binding motif	+	CST;HTP							0.970824	2.88623e-06	86.005	80.306	86.005	0.79103	8.6609	230410000	227640000	781	NaN	8.6609	E9PUI4;Q8VDP3-3;Q8VDP3;Q8VDP3-2	781;781;781;708	E9PUI4	E9PUI4	Protein-methionine sulfoxide oxidase MICAL1	Mical1	PDPSSPPVTRVSPVPSPSQPARRLIRLSSLE	TRVsPVPsPsQPARR
	-0.822733	S	2		___1	14-3-3 domain binding motif;Calmodulin-dependent protein kinase II substrate motif;ERK1,2 kinase substrate motif;G protein-coupled receptor kinase 1 substrate motif;GSK-3, ERK1, ERK2, CDK5 substrate motif;PKA kinase substrate motif;PKC kinase substrate motif;WW domain binding motif	+	CST;HTP							1	1.98843e-06	84.375	84.375	46.514	1.5657	8.29028	98498000	96610000	968	NaN	8.29028	Q9Z0U1	968	Q9Z0U1	Q9Z0U1	Tight junction protein ZO-2	Tjp2	AQMRRAASRDQLRDASPPPAFKPEPPKARSQ	RDQLRDAsPPPAFKP
	-0.822427	S	3		___1	AMP-activated protein kinase substrate motif;ERK1,2 kinase substrate motif;GSK-3, ERK1, ERK2, CDK5 substrate motif;HMGCoA Reductase kinase substrate motif;PKA kinase substrate motif;PKC kinase substrate motif;WW domain binding motif	+	HTP							0.894996	5.29896e-11	97.746	92.162	62.193	-0.33897	8.86796	347150000	390680000	482	NaN	8.86796	Q60953-2;Q60953;F7BTZ2;D3Z3A6;D3YXR5	482;528;474;528;528	Q60953-2	Q60953-2	Protein PML	Pml	TSSPEQSWPSTFKATSPPHLDGTSNPESTVP	PSTFKAtsPPHLDGt
	-0.818452	S	2		___1	14-3-3 domain binding motif;Calmodulin-dependent protein kinase I substrate motif;Calmodulin-dependent protein kinase II substrate motif;Calmodulin-dependent protein kinase IV substrate motif;Casein kinase II substrate motif;Chk1 kinase substrate motif;MDC1 BRCT domain binding motif;PKA kinase substrate motif;PKC kinase substrate motif;Plk1 PBD domain binding motif	+	CST;HTP							0.998714	7.34749e-10	119.87	119.87	83.692	-0.97909	8.30164	91831000	108450000	368	NaN	8.30164	Q6BCL1	368	Q6BCL1	Q6BCL1	PML-RARA-regulated adapter molecule 1	Pram1	QKPSQPELGHLPRTSSDPEFNSLPRKFLQPQ	GHLPRtssDPEFNsL
	-0.816113	S	3		___1	Casein kinase I substrate motif;ERK1,2 kinase substrate motif;G protein-coupled receptor kinase 1 substrate motif;Growth associated histone HI kinase substrate motif;GSK3 kinase substrate motif;GSK-3, ERK1, ERK2, CDK5 substrate motif;PKA kinase substrate motif;PKC kinase substrate motif;WW domain binding motif	+	CST;HTP							1	2.72757e-07	93.608	62.87	93.608	0.96975	8.01098	44758000	57798000	1365	NaN	8.01098	E9PZM4	1365	E9PZM4	E9PZM4		Chd2	NKAPRLKDEHGLEPASPRHSDNPSEEGEVKD	EHGLEPAsPRHsDNP
	-0.814615	T	2		___1	ERK1,2 kinase substrate motif;GSK3, Erk1, Erk2 and CDK5 kinase motif;GSK-3, ERK1, ERK2, CDK5 substrate motif;WW domain binding motif	+	CST;HTP							0.760554	9.38243e-15	122.64	117	122.64	0.3836	7.72392	24424000	28533000	1048	NaN	7.72392	Z4YJT3;Q6ZQ58;Q6ZQ58-2	1048;1048;43	Z4YJT3	Z4YJT3	La-related protein 1	Larp1	QSSSRPATGISQPPTTPTGQATREDAKWTSQ	GISQPPttPtGQAtR
	-0.812942	S	3		___1	14-3-3 domain binding motif;b-Adrenergic Receptor kinase substrate motif;Calmodulin-dependent protein kinase II substrate motif;Casein kinase II substrate motif;ERK1,2 kinase substrate motif;GSK-3, ERK1, ERK2, CDK5 substrate motif;MAPKAPK2 kinase substrate motif;PKA kinase substrate motif;PKC kinase substrate motif;WW domain binding motif	+	HTP							1	1.286e-05	72.399	67.272	72.399	2.8057	7.82898	22069000	45379000	1148	NaN	7.82898	P30415	1148	P30415	P30415	NK-tumor recognition protein;Putative peptidyl-prolyl cis-trans isomerase	Nktr	AKGEVVSPLANHRLDSPEVNIIPEQDECMAH	LANHRLDsPEVNIIP
	-0.811017	T	2		___1	AMP-activated protein kinase substrate motif;Calmodulin-dependent protein kinase II substrate motif;Casein kinase II substrate motif;Growth associated histone HI kinase substrate motif;GSK-3, ERK1, ERK2, CDK5 substrate motif;PKC kinase substrate motif;WW domain binding motif	+	CST;HTP							0.999737	0.00782478	91.701	46.543	87.568	1.3129	7.56701	18459000	18440000	15	NaN	7.56701	O35381;Q64G17	15;15	O35381	O35381	Acidic leucine-rich nuclear phosphoprotein 32 family member A;Putative acidic leucine-rich nuclear phosphoprotein 32 family member C	Anp32a;Anp32c	_MEMDKRIYLELRNRTPSDVKELVLDNCKSI	YLELRNRtPsDVkEL
	-0.809044	S	2		___1	14-3-3 domain binding motif;BARD1 BRCT domain binding motif;Calmodulin-dependent protein kinase II substrate motif;Casein kinase II substrate motif;DNA dependent Protein kinase substrate motif;PKA kinase substrate motif;PKA, PKG kinase substrate motif;PKC epsilon kinase substrate motif;PKC kinase substrate motif;PKG kinase substrate motif	+	CST;HTP							1	0.0147808	54.094	40.158	54.094	-0.89849	7.58152	21098000	17054000	441	NaN	7.58152	D3Z0V2;Q9ES28-6;Q9ES28-8;Q9ES28-4;Q9ES28-5;Q9ES28-3;Q9ES28-2;Q9ES28-7;Q9ES28	441;621;516;621;673;598;673;621;673	D3Z0V2	D3Z0V2	Rho guanine nucleotide exchange factor 7	Arhgef7	TMKKLLPKRKPERKPSDEEFAVRKSTAALEE	RKPERKPsDEEFAVR
	-0.806064	S	3		___1	b-Adrenergic Receptor kinase substrate motif;ERK1,2 kinase substrate motif;G protein-coupled receptor kinase 1 substrate motif;Growth associated histone HI kinase substrate motif;GSK-3, ERK1, ERK2, CDK5 substrate motif;PKA kinase substrate motif;PKC kinase substrate motif;WW domain binding motif	+	CST;HTP							0.999654	5.25301e-53	181.94	170.03	178.06	0.81706	9.02169	519850000	531390000	275	NaN	9.02169	P70441	275	P70441	P70441	Na(+)/H(+) exchange regulatory cofactor NHE-RF1	Slc9a3r1	QKESSREALVEPASESPRPALARSASSDTSE	LVEPAsEsPRPALAR
	-0.805661	S	3		___1	Casein kinase I substrate motif;Casein kinase II substrate motif	+	CST;HTP							0.996917	8.86368e-06	89.624	78.523	65.374	0.13324	7.7684	26461000	32207000	79	NaN	7.7684	O55003	79	O55003	O55003	BCL2/adenovirus E1B 19 kDa protein-interacting protein 3	Bnip3	SQTPQDTNRAEIDSHSFGEKNSTLSEEDYIE	RAEIDsHsFGEkNst
	-0.804501	S	3		___1	b-Adrenergic Receptor kinase substrate motif;Casein kinase II substrate motif	+	HTP							0.772105	1.82946e-05	49.095	49.095	44.757	0.064633	7.7901	26035000	35638000	610	NaN	7.7901	Q8VDP4	610	Q8VDP4	Q8VDP4	DBIRD complex subunit KIAA1967 homolog		KVSKDEVQNEGTAAESDSPLKEDGLLPKRPS	NEGtAAEsDsPLKED
	-0.800098	Y	2	+	___1	Crk SH2 domain binding motif;RasGAP C-terminal SH2 domain binding motif;SHP1 phosphatase substrate motif	+	CST;HTP;LTP	+	activity, induced	transcription, altered; cell growth, altered			tetracycline inducible truncated (lacking Y699) mutant	1	1.41404e-52	201.09	176.4	62.694	1.3736	10.4365	10231000000	17090000000	699	10.4357	7.71052	P42232	699	P42232	P42232	Signal transducer and activator of transcription 5B	Stat5b	TPVPCEPATAKAADGYVKPQIKQVVPEFANA	TAKAADGyVKPQIKQ	JAK2;InsR
	-0.793282	T	3		___1	ERK1,2 kinase substrate motif;G protein-coupled receptor kinase 1 substrate motif;GSK3, Erk1, Erk2 and CDK5 kinase motif;GSK-3, ERK1, ERK2, CDK5 substrate motif;WW domain binding motif	+	HTP							0.984721	1.05958e-05	62.858	55.44	62.858	1.2475	7.336	8009200	13668000	328	NaN	7.336	Q5U4C3	328	Q5U4C3	Q5U4C3	Splicing factor, arginine/serine-rich 19	Scaf1	PRREPPPPQTLGAPGTPPQADSTRAEGAPRR	QtLGAPGtPPQADst
	-0.791108	S	2		___1	Casein kinase II substrate motif;ERK1,2 kinase substrate motif;G protein-coupled receptor kinase 1 substrate motif;Growth associated histone HI kinase substrate motif;GSK-3, ERK1, ERK2, CDK5 substrate motif;PKA kinase substrate motif;PKC kinase substrate motif;WW domain binding motif									0.843902	0.0055927	59.908	7.3289	59.908	0.40262	7.69361	23125000	26262000	917	NaN	7.69361	E0CXE7;Q5SUQ9-3;Q5SUQ9-2;Q5SUQ9	917;918;1163;1164	E0CXE7	E0CXE7	CST complex subunit CTC1	Ctc1	PVKLSFALERRPTDISPREPSRLQQFQCGEL
	-0.788963	S	2		___2	14-3-3 domain binding motif;Calmodulin-dependent protein kinase II substrate motif;DNA dependent Protein kinase substrate motif;ERK1,2 kinase substrate motif;G protein-coupled receptor kinase 1 substrate motif;GSK-3, ERK1, ERK2, CDK5 substrate motif;PKA kinase substrate motif;PKC kinase substrate motif;WW domain binding motif	+	CST;HTP							1	1.5192e-07	110.26	84.437	71.269	-0.14234	8.46347	151480000	139250000	676	NaN	8.46347	Q5U4C3	676	Q5U4C3	Q5U4C3	Splicing factor, arginine/serine-rich 19	Scaf1	TITVGRPDKAEPRAPSPAPAVSPKREVLYDS	kAEPRAPsPAPAVsP
	-0.788963	S	2		___2	Cdc2 kinase substrate motif;CDK kinase substrate motif;CDK1,2,4,6 kinase substrate motif;ERK1,2 kinase substrate motif;Growth associated histone HI kinase substrate motif;GSK-3, ERK1, ERK2, CDK5 substrate motif;PKA kinase substrate motif;PKC kinase substrate motif;WW domain binding motif	+	CST;HTP							1	1.5192e-07	110.26	84.437	71.269	-0.14234	8.53723	174390000	170130000	682	NaN	8.53723	Q5U4C3	682	Q5U4C3	Q5U4C3	Splicing factor, arginine/serine-rich 19	Scaf1	PDKAEPRAPSPAPAVSPKREVLYDSEGLSAD	PsPAPAVsPKREVLy
	-0.788714	S	2		___1	Casein kinase II substrate motif;DNA dependent Protein kinase substrate motif;ERK1,2 kinase substrate motif;GSK-3, ERK1, ERK2, CDK5 substrate motif;WW domain binding motif	+	CST;HTP;LTP							0.874765	0.0273609	43.549	32.521	43.549	0.7665	7.15625	7212300	7117800	392	NaN	7.15625	P48678-2;P48678;P48678-3	392;392;280	P48678-2	P48678-2	Prelamin-A/C;Lamin-A/C	Lmna	RKLLEGEEERLRLSPSPTSQRSRGRASSHSS	ERLRLsPsPtsQRsR	CDK1
	-0.788016	S	3		___1	AMP-activated protein kinase substrate motif;Casein kinase II substrate motif;DNA dependent Protein kinase substrate motif;ERK1,2 kinase substrate motif;GSK-3, ERK1, ERK2, CDK5 substrate motif;PKA kinase substrate motif;PKC kinase substrate motif;WW domain binding motif									0.905167	0.00254504	56.569	37.992	56.569	0.059779	7.17129	7148400	7686100	831	NaN	7.17129	E9PUF7;Q61210-5;Q61210-2;Q61210;Q61210-4;F6ZN61	831;834;774;775;775;535	E9PUF7	E9PUF7	Rho guanine nucleotide exchange factor 1	Arhgef1	SLKVPAPASRLKPRPSPSSIREPLLSSSENG
	-0.787767	S	2		___2	G protein-coupled receptor kinase 1 substrate motif;GSK3 kinase substrate motif;MDC1 BRCT domain binding motif;Plk1 PBD domain binding motif	+	HTP							0.911682	9.95932e-06	90.348	81.312	57.366	0.245	8.32323	92382000	118110000	346	NaN	8.32323	P49586	346	P49586	P49586	Choline-phosphate cytidylyltransferase A	Pcyt1a	SPSFRWPFSGKTSPSSSPASLSRCRAVTCDI	sGktsPsssPAsLsR
	-0.786049	S	2		___1	14-3-3 domain binding motif;Calmodulin-dependent protein kinase II substrate motif;Casein kinase II substrate motif;PKA kinase substrate motif;PKC kinase substrate motif	+	CST;HTP							0.999478	5.82979e-121	241.65	237.6	240.71	0.21898	9.42118	1374000000	1263400000	497	NaN	9.42118	Q8BGD9	497	Q8BGD9	Q8BGD9	Eukaryotic translation initiation factor 4B	Eif4b	NAWVKRSSNPPARSQSSDTEQPSPTSGGGKV	NPPARsQssDtEQPs
	-0.784632	S	2		___1	Casein kinase II substrate motif;MAPKAPK2 kinase substrate motif;PKA kinase substrate motif;PKC kinase substrate motif	+	CST;HTP							1	9.49174e-30	159.26	159.26	102.39	0.48216	9.29684	723930000	1256900000	1338	NaN	9.29684	Q8BTI8;Q8BTI8-2;Q8BTI8-3	1338;1242;1338	Q8BTI8	Q8BTI8	Serine/arginine repetitive matrix protein 2	Srrm2	DPSVDMKEQSRSSRRSSSELSPEVVEKVGLF	QsRssRRsssELsPE
	-0.782794	S	3		___2	b-Adrenergic Receptor kinase substrate motif;Casein kinase II substrate motif	+	HTP							0.952062	7.98934e-12	95.557	91.236	95.557	0.85321	7.66571	22624000	23691000	765	NaN	7.66571	G3X9N6;B9EJ86	765;807	G3X9N6	G3X9N6	Oxysterol-binding protein	Osbpl8	KVVKGYSSPEPDIQDSSGSEAQSVKPSTRRK	PEPDIQDssGsEAQs
	-0.782794	S	3		___2	Casein kinase II substrate motif;G protein-coupled receptor kinase 1 substrate motif;MDC1 BRCT domain binding motif;Plk1 PBD domain binding motif	+	HTP							0.857623	7.98934e-12	95.557	91.236	41.936	0.76891	7.66571	22624000	23691000	766	NaN	7.66571	G3X9N6;B9EJ86	766;808	G3X9N6	G3X9N6	Oxysterol-binding protein	Osbpl8	VVKGYSSPEPDIQDSSGSEAQSVKPSTRRKK	EPDIQDssGsEAQsV
	-0.775663	S	2		___2	Casein kinase II substrate motif;ERK1,2 kinase substrate motif;GSK-3, ERK1, ERK2, CDK5 substrate motif;MAPKAPK2 kinase substrate motif;MDC1 BRCT domain binding motif;Plk1 PBD domain binding motif;WW domain binding motif	+	CST;HTP							0.956831	2.24393e-08	113.47	96.748	60.949	0.76915	8.81086	293220000	353710000	347	NaN	8.81086	P49586	347	P49586	P49586	Choline-phosphate cytidylyltransferase A	Pcyt1a	PSFRWPFSGKTSPSSSPASLSRCRAVTCDIS	GktsPsssPAsLsRC
	-0.772505	S	2		___1	14-3-3 domain binding motif;Calmodulin-dependent protein kinase II substrate motif;Calmodulin-dependent protein kinase IV substrate motif;Chk1 kinase substrate motif;ERK1,2 kinase substrate motif;G protein-coupled receptor kinase 1 substrate motif;GSK-3, ERK1, ERK2, CDK5 substrate motif;PAK2 kinase substrate motif;PKA kinase substrate motif;PKC epsilon kinase substrate motif;PKC kinase substrate …	+	HTP							0.935212	0.00242362	77.867	27.571	76.942	0.30995	8.62519	179730000	242160000	269	NaN	8.62519	P54731	269	P54731	P54731	FAS-associated factor 1	Faf1	GLSYPCHRLTVGRRTSPVQTREQSEEQSTDV	LTVGRRtsPVQtREQ
	-0.772111	S	2		___1	G protein-coupled receptor kinase 1 substrate motif;GSK3 kinase substrate motif	+	HTP							0.999997	0.000546885	55.437	55.437	55.437	-0.69688	8.13856	58553000	79027000	34	NaN	8.13856	Q3U1Z5;G3UZQ1	34;34	Q3U1Z5	Q3U1Z5	G-protein-signaling modulator 3	Gpsm3	DQGWPPVNATARPWRSAPPSPPPPGTRHTAL	ATARPWRsAPPsPPP
	-0.769526	S	2		___1	14-3-3 domain binding motif;Calmodulin-dependent protein kinase II substrate motif;Calmodulin-dependent protein kinase IV substrate motif;Casein kinase II substrate motif;Chk1 kinase substrate motif;G protein-coupled receptor kinase 1 substrate motif;MDC1 BRCT domain binding motif;PKA kinase substrate motif;PKC kinase substrate motif;Plk1 PBD domain binding motif	+	HTP							0.986836	7.00945e-09	119.25	98.476	116.51	1.5458	8.20186	79249000	79920000	126	NaN	8.20186	Q8C2T6;P33611	126;126	Q8C2T6	Q8C2T6	DNA polymerase alpha subunit B	Pola2	SSYTTPSKGPLKRVSSTPETPLTKRSVAARS	GPLKRVsstPEtPLt
	-0.763685	S	3		___1	Casein kinase II substrate motif;DNA dependent Protein kinase substrate motif;ERK1,2 kinase substrate motif;G protein-coupled receptor kinase 1 substrate motif;GSK-3, ERK1, ERK2, CDK5 substrate motif;PKA kinase substrate motif;PKC kinase substrate motif;WW domain binding motif	+	HTP							0.999891	1.46874e-08	81.144	75.027	81.144	0.39692	8.55036	122810000	232300000	35	NaN	8.55036	Q8VCI5	35	Q8VCI5	Q8VCI5	Peroxisomal biogenesis factor 19	Pex19	ELLESALDDFDKAKPSPEHAPTISAPDASGP	DFDKAKPsPEHAPTI
	-0.763514	T	2		___1	G protein-coupled receptor kinase 1 substrate motif;GSK-3, ERK1, ERK2, CDK5 substrate motif;WW domain binding motif	+	HTP							0.98686	0.0353907	45.992	29.855	45.992	-0.32011	7.07181	4304400	7493400	1305	NaN	7.07181	E9Q7S1;R4GML0;O88466;F6UL00	1305;1328;1328;82	E9Q7S1	E9Q7S1	Zinc finger protein 106	Zfp106;Znf106	SGSEACSSSFLRLSFTPETPAEKETQSPADQ	SFLRLSFtPETPAEK
	-0.763367	S	2		___2	14-3-3 domain binding motif;b-Adrenergic Receptor kinase substrate motif;Calmodulin-dependent protein kinase II substrate motif;Calmodulin-dependent protein kinase IV substrate motif;Casein kinase II substrate motif;Chk1 kinase substrate motif;ERK1,2 kinase substrate motif;GSK-3, ERK1, ERK2, CDK5 substrate motif;PKA kinase substrate motif;PKC kinase substrate motif;WW domain binding motif	+	HTP							1	0.0274007	41.399	15.354	41.399	-0.62734	6.41345	1345500	1245400	168	NaN	6.41345	Q3TYS2	168	Q3TYS2	Q3TYS2	Uncharacterized protein C17orf62 homolog		IAKLITSFLELHRLESPSERSQSSDSEPDGP	LELHRLEsPsERsQs
	-0.763367	S	2		___2	Casein kinase I substrate motif;Casein kinase II substrate motif;DNA dependent Protein kinase substrate motif;G protein-coupled receptor kinase 1 substrate motif;PKA kinase substrate motif;PKC kinase substrate motif	+	HTP							1	0.0274007	41.399	15.354	41.399	-0.62734	6.41345	1345500	1245400	170	NaN	6.41345	Q3TYS2	170	Q3TYS2	Q3TYS2	Uncharacterized protein C17orf62 homolog		KLITSFLELHRLESPSERSQSSDSEPDGPGG	LHRLEsPsERsQssD
	-0.762706	S	2		___2	14-3-3 domain binding motif;Calmodulin-dependent protein kinase II substrate motif;Casein kinase II substrate motif;G protein-coupled receptor kinase 1 substrate motif;GSK3 kinase substrate motif;MAPKAPK2 kinase substrate motif;MDC1 BRCT domain binding motif;PAK2 kinase substrate motif;PKA kinase substrate motif;PKC epsilon kinase substrate motif;PKC kinase substrate motif;Plk1 PBD domain binding…	+	CST;HTP							1	9.49174e-30	160.67	136.61	102.39	0.48216	9.40372	928110000	1605400000	1339	NaN	9.40372	Q8BTI8;Q8BTI8-2;Q8BTI8-3	1339;1243;1339	Q8BTI8	Q8BTI8	Serine/arginine repetitive matrix protein 2	Srrm2	PSVDMKEQSRSSRRSSSELSPEVVEKVGLFS	sRssRRsssELsPEV
	-0.760333	S	3		___1	Casein kinase II substrate motif;ERK1,2 kinase substrate motif;G protein-coupled receptor kinase 1 substrate motif;GSK3 kinase substrate motif;GSK-3, ERK1, ERK2, CDK5 substrate motif;WW domain binding motif	+	CST;HTP							0.995786	6.61386e-07	88.071	77.124	82.189	-0.52093	8.14423	60690000	78696000	684	NaN	8.14423	Q8C052	684	Q8C052	Q8C052	Microtubule-associated protein 1S;MAP1S heavy chain;MAP1S light chain	Map1s	VSPCEFSHRKPPPPASPGSSDSSARSQERPP	RKPPPPAsPGsSDSS
	-0.760186	S	2		___1	14-3-3 domain binding motif;Calmodulin-dependent protein kinase II substrate motif;Calmodulin-dependent protein kinase IV substrate motif;Casein kinase II substrate motif;Chk1 kinase substrate motif;G protein-coupled receptor kinase 1 substrate motif;GSK3 kinase substrate motif;PKA kinase substrate motif;PKC kinase substrate motif	+	CST;HTP							0.999402	1.56759e-201	304.13	304.13	298.34	-0.049136	9.57846	1728200000	2060200000	285	NaN	9.57846	P70441	285	P70441	P70441	Na(+)/H(+) exchange regulatory cofactor NHE-RF1	Slc9a3r1	EPASESPRPALARSASSDTSEELNSQDSPKR	PALARsAssDtsEEL
	-0.759698	S	2		___2	Casein kinase II substrate motif;Cdc2 kinase substrate motif;CDK kinase substrate motif;CDK1,2,4,6 kinase substrate motif;ERK1,2 kinase substrate motif;G protein-coupled receptor kinase 1 substrate motif;GSK3 kinase substrate motif;GSK-3, ERK1, ERK2, CDK5 substrate motif;PKA kinase substrate motif;WW domain binding motif	+	HTP							0.999678	1.34466e-07	102.51	88.928	101.08	2.0758	8.40715	129430000	125940000	2113	NaN	8.40715	Q9ERU9	2113	Q9ERU9	Q9ERU9	E3 SUMO-protein ligase RanBP2;Putative peptidyl-prolyl cis-trans isomerase	Ranbp2	GESTTGFNFSFKSALSPSKSPAKLNQSGASV	FsFKSALsPSKsPAK
	-0.759698	S	2		___2	Cdc2 kinase substrate motif;CDK kinase substrate motif;CDK1,2,4,6 kinase substrate motif;ERK1,2 kinase substrate motif;Growth associated histone HI kinase substrate motif;GSK-3, ERK1, ERK2, CDK5 substrate motif;MAPKAPK2 kinase substrate motif;WW domain binding motif	+	HTP							0.999849	8.51294e-13	137.89	127.57	137.89	-0.087407	8.73313	207200000	333710000	2117	NaN	8.73313	Q9ERU9	2117	Q9ERU9	Q9ERU9	E3 SUMO-protein ligase RanBP2;Putative peptidyl-prolyl cis-trans isomerase	Ranbp2	TGFNFSFKSALSPSKSPAKLNQSGASVGTDE	SALsPSKsPAKLNQS
	-0.75392	S	2		___1	ERK1,2 kinase substrate motif;GSK-3, ERK1, ERK2, CDK5 substrate motif;PKA kinase substrate motif;PKC kinase substrate motif;WW domain binding motif	+	HTP							1	8.60571e-06	136.21	101.96	136.21	0.056644	7.94513	45692000	42440000	1153	NaN	7.94513	Q9ESU6;Q3UH70	1153;1154	Q9ESU6	Q9ESU6	Bromodomain-containing protein 4	Brd4	VQPQPLVVVKEEKIHSPIIRSEPFSTSLRPE	VKEEKIHsPIIRSEP
	-0.752558	T	2		___1	Akt kinase substrate motif;Calmodulin-dependent protein kinase II substrate motif;Casein kinase II substrate motif;G protein-coupled receptor kinase 1 substrate motif;MAPKAPK2 kinase substrate motif;PKC kinase substrate motif	+	CST;HTP;LTP							0.991764	0.0180899	73.841	65.744	53.237	0.0016122	7.67485	23241000	24058000	366	NaN	7.67485	Q62433	366	Q62433	Q62433	Protein NDRG1	Ndrg1	RSRSHTSEGSRSRSHTSEDARLNITPNSGAT	GsRsRsHtsEDARLN
	-0.751805	T	3		___1	Casein kinase I substrate motif;Dual specificity protein phosphatase 6 substrate motif;G protein-coupled receptor kinase 1 substrate motif;MAPK 11,13,14 kinase substrate motif;PP2C delta substrate motif	+	CST;HTP;LTP	+	molecular association, regulation; enzymatic activity, induced	transcription, altered	PKCZ(INDUCES)			1	2.07422e-60	208.49	198.98	134.88	0.029273	9.49056	329660000	2764600000	104	9.48226	7.76768	P47811-4;P47811;P47811-3;P47811-2;B2KF35;B2KF34	104;180;180;180;180;180	P47811-4	P47811-4	Mitogen-activated protein kinase 14	Mapk14	KILDFGLARHTDDEMTGYVATRWYRAPEIML	RHtDDEMtGyVAtRW	P38A;MKK6
	-0.747584	S	2		___1	Casein kinase II substrate motif;G protein-coupled receptor kinase 1 substrate motif;Pyruvate dehydrogenase kinase substrate motif	+	CST;HTP							0.998154	5.41441e-13	133.47	127.03	133.47	-0.028652	8.64032	200160000	236680000	88	NaN	8.64032	O55003	88	O55003	O55003	BCL2/adenovirus E1B 19 kDa protein-interacting protein 3	Bnip3	AEIDSHSFGEKNSTLSEEDYIERRREVESIL	GEkNstLsEEDyIER
	-0.746737	S	2		___1	14-3-3 domain binding motif;b-Adrenergic Receptor kinase substrate motif;Calmodulin-dependent protein kinase II substrate motif;Casein kinase II substrate motif;PAK2 kinase substrate motif;PKA kinase substrate motif;PKC epsilon kinase substrate motif;PKC kinase substrate motif	+	CST;HTP;LTP							0.995888	9.81806e-08	123.68	87.913	123.68	0.43346	7.38536	9565300	14721000	1021	NaN	7.38536	Q792F9;Q00651	1021;1028	Q792F9	Q792F9	Integrin alpha-4	Itga4	KRQYKSILQEENRRDSWSYVNSKSNDD____	QEENRRDsWsYVNSK
	-0.740408	S	2		___2	Casein kinase II substrate motif;G protein-coupled receptor kinase 1 substrate motif;GSK3 kinase substrate motif;PKA kinase substrate motif;PKC kinase substrate motif	+	HTP							0.999997	7.99855e-06	91.969	82.188	91.969	-1.1951	8.5608	159500000	204250000	101	NaN	8.5608	Q3U9G9	101	Q3U9G9	Q3U9G9	Lamin-B receptor	Lbr	SRSRSPGRAPKGSRRSVSASHEGDVKEKKEK	APKGSRRsVsAsHEG
	-0.740408	S	2		___2	14-3-3 domain binding motif;Calmodulin-dependent protein kinase II substrate motif;Casein kinase II substrate motif;PKA kinase substrate motif;PKC kinase substrate motif;ZIP kinase substrate motif	+	HTP							0.999993	2.05337e-31	174.39	162.22	165.54	0.21762	9.38178	923970000	1484800000	103	NaN	9.38178	Q3U9G9	103	Q3U9G9	Q3U9G9	Lamin-B receptor	Lbr	SRSPGRAPKGSRRSVSASHEGDVKEKKEKEM	KGSRRsVsAsHEGDV
	-0.739155	S	3		___1	b-Adrenergic Receptor kinase substrate motif;BARD1 BRCT domain binding motif;Casein kinase I substrate motif;Casein kinase II substrate motif	+	HTP							0.999532	2.59664e-25	119.37	114.92	119.37	-0.60634	8.46876	116820000	177450000	267	NaN	8.46876	Q9EQC8	267	Q9EQC8	Q9EQC8		Prcc	AALQVTKQITQEDDDSDEEVAPENFFSLPDK	ItQEDDDsDEEVAPE
	-0.736942	S	3		___1	ERK1,2 kinase substrate motif;GSK-3, ERK1, ERK2, CDK5 substrate motif;MDC1 BRCT domain binding motif;Plk1 PBD domain binding motif;WW domain binding motif	+	HTP							0.796349	2.70516e-13	95.652	84.055	95.652	1.1595	7.90688	33675000	47027000	190	NaN	7.90688	P60335	190	P60335	P60335	Poly(rC)-binding protein 1	Pcbp1	QGRVMTIPYQPMPASSPVICAGGQDRCSDAA	yQPMPAssPVICAGG
	-0.732884	S	2		___1	Casein kinase II substrate motif;ERK1,2 kinase substrate motif;G protein-coupled receptor kinase 1 substrate motif;Growth associated histone HI kinase substrate motif;GSK3 kinase substrate motif;GSK-3, ERK1, ERK2, CDK5 substrate motif;Pyruvate dehydrogenase kinase substrate motif;WW domain binding motif	+	HTP							1	1.75316e-157	273.96	248.7	273.96	2.4613	9.05088	499340000	625000000	250	NaN	9.05088	E9Q1P8	250	E9Q1P8	E9Q1P8	Interferon regulatory factor 2-binding protein 2	Irf2bp2	EAREPSKEKAQPAHRSPADSLSSAAGASELS	KAQPAHRsPADsLss
	-0.730273	S	2		___1	Casein kinase II substrate motif;ERK1,2 kinase substrate motif;Growth associated histone HI kinase substrate motif;GSK-3, ERK1, ERK2, CDK5 substrate motif;PKA kinase substrate motif;PKC kinase substrate motif;WW domain binding motif	+	HTP							0.999915	0.00256263	92.247	25.761	92.247	0.69818	7.38826	11717000	12732000	1181	NaN	7.38826	Q8C0T5-2;Q8C0T5	1181;1181	Q8C0T5-2	Q8C0T5-2	Signal-induced proliferation-associated 1-like protein 1	Sipa1l1	YRQKSMPEGFGVSRRSPASIDRQNTQSDISG	GFGVSRRsPAsIDRQ
	-0.728144	S	2		___1	AMP-activated protein kinase substrate motif;Casein kinase II substrate motif;HMGCoA Reductase kinase substrate motif;PKA kinase substrate motif;PKC kinase substrate motif	+	HTP							0.969495	5.42753e-06	91.401	84.798	91.401	1.1124	7.93691	41099000	45379000	8	NaN	7.93691	Q8K1B8	8	Q8K1B8	Q8K1B8	Fermitin family homolog 3	Fermt3	________MAGMKTASGDYIDSSWELRVFVG	MAGMKtAsGDyIDSS
	-0.726615	S	2		___1	Casein kinase I substrate motif;Casein kinase II substrate motif;ERK1,2 kinase substrate motif;GSK-3, ERK1, ERK2, CDK5 substrate motif;PKA kinase substrate motif;WW domain binding motif	+	HTP							0.996549	0.0489215	55.046	23.654	55.046	1.1149	7.72095	32329000	20267000	167	NaN	7.72095	Q3U1J1-2;Q3U1J1	167;167	Q3U1J1-2	Q3U1J1-2	TCF3 fusion partner homolog	Tfpt	TPGNAENEPPEKEGLSPSQRTTATLDPTSPA	PPEKEGLsPSQRTtA
	-0.725041	T	3		___2	Casein kinase II substrate motif;ERK1,2 kinase substrate motif;G protein-coupled receptor kinase 1 substrate motif;Growth associated histone HI kinase substrate motif;GSK3, Erk1, Erk2 and CDK5 kinase motif;GSK-3, ERK1, ERK2, CDK5 substrate motif;WW domain binding motif	+	CST;HTP							0.906932	1.393e-37	139.85	139.85	58.349	-0.061641	8.54239	156330000	192320000	21	NaN	8.54239	F6TVP2;E9Q0K6;Q60710;F8WJE0;E9PYG9;E0CXZ5	32;52;21;52;52;21	F6TVP2;Q60710	Q60710	Deoxynucleoside triphosphate triphosphohydrolase SAMHD1	Samhd1	LEQPAKRPRCDGSPRTPPSTPPATANLSADD	RCDGsPRtPPstPPA
	-0.725041	T	3		___2	ERK1,2 kinase substrate motif;G protein-coupled receptor kinase 1 substrate motif;GSK3, Erk1, Erk2 and CDK5 kinase motif;GSK-3, ERK1, ERK2, CDK5 substrate motif;MDC1 BRCT domain binding motif;Plk1 PBD domain binding motif;WW domain binding motif	+	CST;HTP							0.924132	1.393e-37	139.85	139.85	118.44	0.97682	8.4638	128750000	162190000	25	NaN	8.4638	F6TVP2;E9Q0K6;Q60710;F8WJE0;E9PYG9;E0CXZ5	36;56;25;56;56;25	F6TVP2;Q60710	Q60710	Deoxynucleoside triphosphate triphosphohydrolase SAMHD1	Samhd1	AKRPRCDGSPRTPPSTPPATANLSADDDFQN	sPRtPPstPPAtANL
	-0.72192	S	3		___1	14-3-3 domain binding motif;Calmodulin-dependent protein kinase II substrate motif;Calmodulin-dependent protein kinase IV substrate motif;Casein kinase II substrate motif;Chk1 kinase substrate motif;G protein-coupled receptor kinase 1 substrate motif;PKA kinase substrate motif;PKC epsilon kinase substrate motif;PKC kinase substrate motif;Pyruvate dehydrogenase kinase substrate motif	+	CST;HTP							1	0.000113472	92.943	84.347	92.943	0.21873	8.42535	124580000	141710000	105	NaN	8.42535	Q9DCF9-2;Q9DCF9	105;105	Q9DCF9-2	Q9DCF9-2	Translocon-associated protein subunit gamma	Ssr3	QKREDAVSKEVTRKLSEADNRKMSRKEKDER	KEVTRKLsEADNRKM
	-0.717406	S	2		___1	Casein kinase II substrate motif;MDC1 BRCT domain binding motif;PKA kinase substrate motif;PKC kinase substrate motif;Plk1 PBD domain binding motif	+	HTP							0.796017	1.20589e-07	103.14	97.843	91.076	0.5384	8.51347	122650000	203540000	378	NaN	8.51347	Q91W39;B7ZC23	378;98	Q91W39	Q91W39	Nuclear receptor coactivator 5	Ncoa5	IINYLRERKERLLRSSADSLPGPISRQPLGA	KERLLRssADsLPGP
	-0.712835	S	2		___1	ERK1,2 kinase substrate motif;GSK-3, ERK1, ERK2, CDK5 substrate motif;WW domain binding motif	+	HTP							1	0.0214008	56.906	51.807	44.511	-0.10841	7.50043	15160000	16493000	274	NaN	7.50043	Q8BYW1-2;Q8BYW1-3;Q8BYW1	274;337;363	Q8BYW1-2	Q8BYW1-2	Rho GTPase-activating protein 25	Arhgap25	RDHEVLFPKSKDAPISPPAQKNDAKKAPVPR	KSKDAPIsPPAQKND
	-0.711842	S	2		___1	Casein kinase I substrate motif;Cdc2 kinase substrate motif;CDK kinase substrate motif;CDK1,2,4,6 kinase substrate motif;CDK4 kinase substrate motif;ERK1,2 kinase substrate motif;GSK-3, ERK1, ERK2, CDK5 substrate motif;MAPKAPK2 kinase substrate motif;WW domain binding motif	+	HTP							0.998881	0.03079	47.302	26.782	40.727	0.67437	6.95353	3802200	5183100	398	NaN	6.95353	Q60929-2;Q60929-3;Q60929	398;400;406	Q60929-2	Q60929-2	Myocyte-specific enhancer factor 2A	Mef2a	SINTNQNINIKSEPISPPRDRMTPSGFQQQQ	NIKSEPIsPPRDRMt
	-0.711181	S	3		___1	Casein kinase II substrate motif;G protein-coupled receptor kinase 1 substrate motif;GSK3 kinase substrate motif	+	HTP							0.935583	9.59693e-13	83.601	83.601	83.601	0.47332	8.28147	80407000	110790000	11	NaN	8.28147	D3Z478;D3YYS7;Q9D0L8-2;Q9D0L8-3;Q9D0L8;D3Z4K1	11;11;11;11;11;11	D3Z478	D3Z478	mRNA cap guanine-N7 methyltransferase	Rnmt	_____MEGSAKASVASDPESPPGGNEPAAAS	SAKAsVAsDPEsPPG
	-0.708326	S	2		___1	14-3-3 domain binding motif;Calmodulin-dependent protein kinase II substrate motif;G protein-coupled receptor kinase 1 substrate motif;MAPKAPK1 kinase substrate motif;PAK2 kinase substrate motif;Pim1 kinase substrate sequence;PKA kinase substrate motif;PKA, PKG kinase substrate motif;PKC epsilon kinase substrate motif;PKC kinase substrate motif;PKG kinase substrate motif;ZIP kinase substrate motif	+	HTP							1	2.24397e-13	138.37	132.55	110.97	0.042457	9.1625	531600000	922170000	21	NaN	9.1625	P97310	21	P97310	P97310	DNA replication licensing factor MCM2	Mcm2	ESLSASSPARQRRRISDPLTSSPGRSSRRAD	ARQRRRIsDPLtssP
	-0.707524	T	2		___1	Cdc2 kinase substrate motif;CDK1,2,4,6 kinase substrate motif;CDK5 kinase substrate motif;Growth associated histone HI kinase substrate motif;GSK-3, ERK1, ERK2, CDK5 substrate motif;WW domain binding motif	+	CST;HTP;LTP							1	7.28725e-36	96.703	95.696	47.113	-0.86051	8.61185	176210000	232900000	69	NaN	8.61185	Q60876	69	Q60876	Q60876	Eukaryotic translation initiation factor 4E-binding protein 1	Eif4ebp1	DRKFLMECRNSPVAKTPPKDLPAIPGVTSPT	RNsPVAKtPPKDLPA	mTOR
	-0.7067	S	3		___1	Casein kinase II substrate motif;PKA kinase substrate motif;Pyruvate dehydrogenase kinase substrate motif	+	CST;HTP;LTP	+	intracellular localization; enzymatic activity, induced					0.947755	8.43782e-92	211.11	204.32	139.72	-0.32554	8.77879	279660000	321230000	643	NaN	8.77879	P28867;P28867-2;Q1MX43;Q1MX42	643;669;528;554	P28867	P28867	Protein kinase C delta type;Protein kinase C delta type regulatory subunit;Protein kinase C delta type catalytic subunit	Prkcd	YSNFDPEFLNEKPQLSFSDKNLIDSMDQEAF	LNEKPQLsFsDKNLI	PKCD
	-0.703126	S	3		___1	14-3-3 domain binding motif;Akt kinase substrate motif;b-Adrenergic Receptor kinase substrate motif;Calmodulin-dependent protein kinase II substrate motif;G protein-coupled receptor kinase 1 substrate motif;MAPKAPK1 kinase substrate motif;PKA kinase substrate motif;PKC kinase substrate motif;ZIP kinase substrate motif	+	CST;HTP							1	3.33695e-61	198.98	185.55	198.98	-0.44104	8.49132	136150000	173830000	10	NaN	8.49132	Q80V62;Q80V62-2	10;10	Q80V62	Q80V62	Fanconi anemia group D2 protein homolog	Fancd2	______MISKRRRLDSEDKENLTEDASKTMP	SKRRRLDsEDKENLt
	-0.702046	S	2		___1	14-3-3 domain binding motif;Calmodulin-dependent protein kinase II substrate motif;Casein kinase II substrate motif;G protein-coupled receptor kinase 1 substrate motif;GSK3 kinase substrate motif;Phosphorylase kinase substrate motif;PKA kinase substrate motif;PKC epsilon kinase substrate motif;PKC kinase substrate motif	+	HTP							0.995758	0.00295022	54.157	31.138	53.869	0.8016	8.17502	65155000	84475000	698	NaN	8.17502	O35691;Q3TUQ5	698;699	O35691	O35691	Pinin	Pnn	RKGSKDKSSRPDRKRSISESSRSGKRSSRSE	SRPDRKRsIsEssRS
	-0.696494	S	4		___1	Cdc2 kinase substrate motif;CDK kinase substrate motif;CDK1,2,4,6 kinase substrate motif;ERK1,2 kinase substrate motif;G protein-coupled receptor kinase 1 substrate motif;GSK3 kinase substrate motif;GSK-3, ERK1, ERK2, CDK5 substrate motif;MAPKAPK2 kinase substrate motif;WW domain binding motif	+	HTP;LTP							0.861752	2.81933e-36	131.62	130.08	131.62	-0.17224	7.82737	29646000	37554000	298	NaN	7.82737	Q8VDQ8-4;Q8VDQ8-2;Q8VDQ8	298;332;368	Q8VDQ8-4	Q8VDQ8-4	NAD-dependent protein deacetylase sirtuin-2	Sirt2	DAQSGSQAPNPSTTISPGKSPPPAKEAARTK	PNPSTTIsPGKSPPP;PNPsTTIsPGksPPP
	-0.694812	S	2		___1	AMP-activated protein kinase substrate motif;b-Adrenergic Receptor kinase substrate motif;Casein kinase I substrate motif;Casein kinase II substrate motif;Pyruvate dehydrogenase kinase substrate motif	+	HTP							1	2.72168e-06	113.24	97.299	88.021	0.16547	9.52325	1523300000	1812800000	257	NaN	9.52325	Q61233	257	Q61233	Q61233	Plastin-2	Lcp1	LSRNEALIALLREGESLEDLMKLSPEELLLR	ALLREGEsLEDLMkL
	-0.692408	S	3		___1	b-Adrenergic Receptor kinase substrate motif;Casein kinase II substrate motif;G protein-coupled receptor kinase 1 substrate motif;PKA kinase substrate motif;PKC kinase substrate motif	+	HTP							0.779107	0.00708991	44.468	37.41	44.468	0.54634	7.55017	18908000	16587000	1414	NaN	7.55017	B1AZI6;F6SBF2;Q8C690	1414;150;25	B1AZI6	B1AZI6	THO complex subunit 2	Thoc2	DISEPDREQKRRKIDSHPSPSHSSTVKDSLI	QKRRKIDsHPsPsHS
	-0.690964	S	4		___1	ERK1, ERK2, SAPK, CDK5 and GSK3 kinase substrate motif;ERK1,2 kinase substrate motif;G protein-coupled receptor kinase 1 substrate motif;Growth associated histone HI kinase substrate motif;GSK-3, ERK1, ERK2, CDK5 substrate motif;MAPKAPK2 kinase substrate motif;WW domain binding motif	+	HTP							0.982549	1.78045e-31	124.42	112.19	124.42	-0.9058	8.27522	64766000	123690000	302	NaN	8.27522	Q8VDQ8-4;Q8VDQ8-2;Q8VDQ8	302;336;372	Q8VDQ8-4	Q8VDQ8-4	NAD-dependent protein deacetylase sirtuin-2	Sirt2	GSQAPNPSTTISPGKSPPPAKEAARTKEKEE	TTIsPGksPPPAKEA
	-0.690172	S	2		___1	14-3-3 domain binding motif;Akt kinase substrate motif;Calmodulin-dependent protein kinase II substrate motif;Casein kinase II substrate motif;G protein-coupled receptor kinase 1 substrate motif;GSK3 kinase substrate motif;MAPKAPK1 kinase substrate motif;PKA kinase substrate motif;PKC kinase substrate motif;Pyruvate dehydrogenase kinase substrate motif;ZIP kinase substrate motif	+	CST;HTP							0.998934	0.0546225	46.069	20.595	46.069	1.0122	7.20833	8176500	7979600	210	NaN	7.20833	Q3TYY8;E9Q9M8	210;210	Q3TYY8	Q3TYY8		Pwwp2b	SPSPLNTPKPRRRLGSGPDSEHRKPEEPEDS	KPRRRLGsGPDsEHR
	-0.682835	S	2		___1	b-Adrenergic Receptor kinase substrate motif;ERK1,2 kinase substrate motif;GSK-3, ERK1, ERK2, CDK5 substrate motif;WW domain binding motif	+	HTP							1	6.36468e-36	164.58	158.92	164.58	1.8823	8.66639	224950000	238920000	673	NaN	8.66639	P35831	673	P35831	P35831	Tyrosine-protein phosphatase non-receptor type 12	Ptpn12	TPHSGAEKDADVSEESPPPLPERTPESFVLA	DADVSEEsPPPLPER
	-0.677587	S	2		___1	Casein kinase I substrate motif;Casein kinase II substrate motif;ERK1,2 kinase substrate motif;G protein-coupled receptor kinase 1 substrate motif;Growth associated histone HI kinase substrate motif;GSK3 kinase substrate motif;GSK-3, ERK1, ERK2, CDK5 substrate motif;PKA kinase substrate motif;PKC kinase substrate motif;WW domain binding motif	+	HTP;LTP							0.998389	0.00815695	65.219	36.594	65.219	-0.50264	7.73599	27440000	27009000	173	NaN	7.73599	P47930-2;P47930	173;200	P47930-2	P47930-2	Fos-related antigen 2	Fosl2	VAHGPVCKISPEERRSPPTSGLQSLRGTGSA	ISPEERRsPPtsGLQ
	-0.677403	S	3		___1	ERK1,2 kinase substrate motif;G protein-coupled receptor kinase 1 substrate motif;Growth associated histone HI kinase substrate motif;GSK3 kinase substrate motif;GSK-3, ERK1, ERK2, CDK5 substrate motif;MAPKAPK2 kinase substrate motif;PKA kinase substrate motif;PKC kinase substrate motif;WW domain binding motif	+	HTP							0.999735	2.44405e-17	109.53	107.34	109.53	-0.50828	8.39801	120420000	129620000	424	NaN	8.39801	S4R2J8;S4R1B8;D3Z6Q9;S4R270	424;429;439;456	S4R2J8	S4R2J8	Bridging integrator 2	Bin2	SCNAPGSPEGSSQLCSPRASPDASSNPEPAE	EGssQLCsPRAsPDA
	-0.67565	S	2		___1	Cdc2 kinase substrate motif;CDK kinase substrate motif;CDK1,2,4,6 kinase substrate motif;ERK1,2 kinase substrate motif;GSK-3, ERK1, ERK2, CDK5 substrate motif;WW domain binding motif	+	HTP							0.991598	3.93314e-84	210.62	204.66	192.01	-0.70451	9.01418	464930000	568260000	920	NaN	9.01418	P70268;P70268-2	920;926	P70268	P70268	Serine/threonine-protein kinase N1	Pkn1	VSNFDEEFTGEAPTLSPPRDARPLTAAEQAA	TGEAPtLsPPRDARP
	-0.675535	S	3		___1	Casein kinase II substrate motif;G protein-coupled receptor kinase 1 substrate motif;PKA kinase substrate motif;PKC kinase substrate motif	+	HTP							0.793925	1.98379e-10	77.995	74.956	69.492	-0.27349	7.86645	25963000	47565000	298	NaN	7.86645	H3BKM2;Q80YV2-2;Q80YV2	298;340;340	H3BKM2	H3BKM2	Nuclear-interacting partner of ALK	Zc3hc1	MTRSQDATVSPGSEQSEKSPGPIVSRTRSWE	VsPGsEQsEKsPGPI
	-0.67344	S	2		___1	Casein kinase II substrate motif									0.991362	0.0398132	55.353	19.701	55.353	-0.553	7.3229	10170000	10863000	27	NaN	7.3229	Q3SXA6	27	Q3SXA6	Q3SXA6		Tnip3	EHTECAPPRRKDLTNSLERKIKHLEKQRQEL
	-0.673348	S	2		___2	Casein kinase II substrate motif;G protein-coupled receptor kinase 1 substrate motif	+	HTP							0.997054	0.0589868	62.089	28.003	62.089	0.040014	7.90202	41412000	38393000	482	NaN	7.90202	Q8BTI8;Q8BTI8-2;Q8BTI8-3	482;386;482	Q8BTI8	Q8BTI8	Serine/arginine repetitive matrix protein 2	Srrm2	RDKSHSHTPSHRAGRSRSPATKRGRSRSRTP	PSHRAGRsRsPAtKR
	-0.673348	S	2		___2	14-3-3 domain binding motif;Calmodulin-dependent protein kinase II substrate motif;Casein kinase II substrate motif;ERK1,2 kinase substrate motif;Growth associated histone HI kinase substrate motif;GSK-3, ERK1, ERK2, CDK5 substrate motif;PKA kinase substrate motif;PKC kinase substrate motif;WW domain binding motif	+	HTP							0.828715	0.0589868	62.089	28.003	62.089	0.040014	7.90202	41412000	38393000	484	NaN	7.90202	Q8BTI8;Q8BTI8-2;Q8BTI8-3	484;388;484	Q8BTI8	Q8BTI8	Serine/arginine repetitive matrix protein 2	Srrm2	KSHSHTPSHRAGRSRSPATKRGRSRSRTPTK	HRAGRsRsPAtKRGR
	-0.672612	S	2		___1	Casein kinase II substrate motif;ERK1,2 kinase substrate motif;Growth associated histone HI kinase substrate motif;GSK-3, ERK1, ERK2, CDK5 substrate motif;WW domain binding motif	+	HTP							0.970418	3.65933e-57	183.15	170	183.15	0.68811	7.71712	22410000	29725000	187	NaN	7.71712	Q6WVG3	187	Q6WVG3	Q6WVG3	BTB/POZ domain-containing protein KCTD12	Kctd12	ASAGAPSPTLELASRSPSGGAAGPLLTPSQS	tLELAsRsPsGGAAG
	-0.672543	S	2		___2	Casein kinase II substrate motif;ERK1,2 kinase substrate motif;G protein-coupled receptor kinase 1 substrate motif;GSK3 kinase substrate motif;GSK-3, ERK1, ERK2, CDK5 substrate motif;MAPKAPK2 kinase substrate motif;PKA kinase substrate motif;PKC kinase substrate motif;WW domain binding motif	+	CST;HTP							0.852885	4.01099e-08	97.291	86.813	75.316	0.21822	9.17892	673530000	836290000	343	NaN	9.17892	P49586	343	P49586	P49586	Choline-phosphate cytidylyltransferase A	Pcyt1a	RSPSPSFRWPFSGKTSPSSSPASLSRCRAVT	WPFsGktsPsssPAs
	-0.671715	S	2		___1	Casein kinase II substrate motif;DNA dependent Protein kinase substrate motif									1	0.0253626	81.525	33.656	65.157	-0.091566	9.35305	1062500000	1192000000	1649	NaN	9.35305	A2BH40-3;A2BH40;E9QAQ7;A2BH40-4;A2BH40-2	1649;1866;1870;1486;1487	A2BH40-3	A2BH40-3	AT-rich interactive domain-containing protein 1A	Arid1a	EHIQTHFESKIELLPSRPYVPCPTPPRKHLT
	-0.669878	S	3		___1	14-3-3 domain binding motif;Calmodulin-dependent protein kinase II substrate motif;MAPKAPK1 kinase substrate motif;PAK2 kinase substrate motif;PKA kinase substrate motif;PKA, PKG kinase substrate motif;PKC epsilon kinase substrate motif;PKC kinase substrate motif;PKG kinase substrate motif									1	1.81631e-09	96.773	86.129	96.773	0.069866	8.10789	58888000	69316000	563	NaN	8.10789	F7BJB9	563	F7BJB9	F7BJB9		Morc3	LGVHSSILNAKTRRLSNPPVENSSYKNDDDE
	-0.666416	S	2		___1	Casein kinase II substrate motif;ERK1,2 kinase substrate motif;G protein-coupled receptor kinase 1 substrate motif;GSK3 kinase substrate motif;GSK-3, ERK1, ERK2, CDK5 substrate motif;WW domain binding motif	+	CST;HTP							0.999994	1.05226e-18	141.07	94.371	141.07	-0.0069376	8.87087	355080000	387720000	5504	NaN	8.87087	E9Q616	5504	E9Q616	E9Q616		Ahnak	KHIFSKSKGKGGVTGSPEASISGSKGDLKSS	GKGGVtGsPEAsIsG
	-0.661615	S	3		___2	14-3-3 domain binding motif;Calmodulin-dependent protein kinase II substrate motif;Calmodulin-dependent protein kinase IV substrate motif;Casein kinase II substrate motif;Chk1 kinase substrate motif;PKA kinase substrate motif;PKC kinase substrate motif	+	CST;HTP							0.95042	1.9978e-08	91.276	86.518	91.276	1.4668	8.01077	50923000	51585000	27	NaN	8.01077	Q9DBC3;D3Z491	27;27	Q9DBC3	Q9DBC3	Cap-specific mRNA (nucleoside-2'-O-)-methyltransferase 1	Ftsjd2	PLKKQKRIGELARHLSSTSDDEPLSSVNHAA	GELARHLsstsDDEP
	-0.660726	S	3		___1	14-3-3 domain binding motif;Calmodulin-dependent protein kinase II substrate motif;DNA dependent Protein kinase substrate motif;ERK1,2 kinase substrate motif;GSK-3, ERK1, ERK2, CDK5 substrate motif;PKA kinase substrate motif;PKC kinase substrate motif;WW domain binding motif	+	HTP							1	1.38049e-64	187.75	181.11	187.75	0.43239	8.59614	189910000	204660000	28	NaN	8.59614	Q69ZC8	28	Q69ZC8	Q69ZC8	Uncharacterized protein KIAA1704	Kiaa1704	GFKEHATVEDEERDPSPVAGPALPPNYRSCS	EDEERDPsPVAGPAL
	-0.660201	S	2		___1	14-3-3 domain binding motif;Akt kinase substrate motif;Calmodulin-dependent protein kinase II substrate motif;Casein kinase II substrate motif;DNA dependent Protein kinase substrate motif;G protein-coupled receptor kinase 1 substrate motif;MAPKAPK1 kinase substrate motif;p70 Ribosomal S6 kinase substrate motif;Phosphorylase kinase substrate motif;PKA kinase substrate motif;PKC kinase substrate mo…	+	CST;HTP							1	9.61476e-18	145.92	134.45	87.352	0.41624	8.27075	78489000	108040000	1685	NaN	8.27075	Q8BTI8;Q8BTI8-2;Q8BTI8-3	1685;1589;1685	Q8BTI8	Q8BTI8	Serine/arginine repetitive matrix protein 2	Srrm2	PEIRSRTPPRRRRSPSVSSPEPTEKSRSSRR	PRRRRsPsVssPEPt
	-0.659631	S	3		___1	14-3-3 domain binding motif;Akt kinase substrate motif;Calmodulin-dependent protein kinase II substrate motif;MAPKAPK1 kinase substrate motif;PKA kinase substrate motif;PKC delta kinase substrate motif;PKC epsilon kinase substrate motif;PKC kinase substrate motif	+	CST;HTP							0.999998	5.64285e-43	128.52	123.71	128.52	0.3707	9.00108	474380000	528110000	577	NaN	9.00108	Q3TBD2;G3X9Q3;D3Z7R7;Q3TBD2-2;Q3TBD2-3;Q3TBD2-4	577;577;588;461;268;116	Q3TBD2	Q3TBD2	Minor histocompatibility protein HA-1	Hmha1	VSNNSWSPIMRTRKGSFNPGDASGPEAAGSP	IMRTRKGsFNPGDAs
	-0.659404	S	2		___2	ERK1,2 kinase substrate motif;G protein-coupled receptor kinase 1 substrate motif;Growth associated histone HI kinase substrate motif;GSK3 kinase substrate motif;GSK-3, ERK1, ERK2, CDK5 substrate motif;PKA kinase substrate motif;PKC kinase substrate motif;WW domain binding motif	+	CST;HTP							0.944841	0.0022598	61.37	48.362	45.267	-0.76935	7.66071	17327000	28457000	1058	NaN	7.66071	Q8BTI8;Q8BTI8-2;Q8BTI8-3	1058;962;1058	Q8BTI8	Q8BTI8	Serine/arginine repetitive matrix protein 2	Srrm2	QTQVESPLLQSKSQTSPKGSLSRSSSPVTEL	LQSKsQtsPKGsLsR
	-0.657331	S	2		___1	ERK1,2 kinase substrate motif;G protein-coupled receptor kinase 1 substrate motif;GSK-3, ERK1, ERK2, CDK5 substrate motif;WW domain binding motif	+	HTP							0.972247	2.13953e-05	101.92	91.851	87.654	-0.2927	8.14996	71726000	69511000	688	NaN	8.14996	P53995;A2ATQ5	688;688	P53995	P53995	Anaphase-promoting complex subunit 1	Anapc1	DRLAWTRSFDFEGSLSPVIAPKKARPSDTGS	FDFEGsLsPVIAPKK
	-0.654059	S	3		___1	14-3-3 domain binding motif;Calmodulin-dependent protein kinase II substrate motif;G protein-coupled receptor kinase 1 substrate motif;MAPKAPK2 kinase substrate motif;PAK2 kinase substrate motif;PKA kinase substrate motif;PKC epsilon kinase substrate motif;PKC kinase substrate motif	+	HTP							1	0.00843727	41.399	37.561	41.399	0.10565	6.87488	3456400	4040400	83	NaN	6.87488	E9Q0A7;Q4KMM3-4;Q4KMM3	83;90;90	E9Q0A7	E9Q0A7	Oxidation resistance protein 1	Oxr1	TGQKKTLDKKDGRRMSFQKPKGTIEYTVESR	KKDGRRMsFQKPKGT
	-0.651972	S	2		___2	Casein kinase I substrate motif;Casein kinase II substrate motif;ERK1,2 kinase substrate motif;G protein-coupled receptor kinase 1 substrate motif;GSK3 kinase substrate motif;GSK-3, ERK1, ERK2, CDK5 substrate motif;WW domain binding motif	+	HTP							0.999163	2.53784e-10	113.4	105.05	77.13	4.3275	8.1833	63557000	88951000	575	NaN	8.1833	Q8BZ47	575	Q8BZ47	Q8BZ47	Zinc finger protein 609	Znf609	PARSATPKVRLVEPHSPSPSSKFSTKGLCKK	VRLVEPHsPsPsSKF
	-0.651972	S	2		___2	Casein kinase II substrate motif;DNA dependent Protein kinase substrate motif;ERK1,2 kinase substrate motif;GSK-3, ERK1, ERK2, CDK5 substrate motif;WW domain binding motif	+	HTP							0.985759	0.000884223	77.13	60.244	77.13	4.3275	7.43316	15914000	11198000	577	NaN	7.43316	Q8BZ47	577	Q8BZ47	Q8BZ47	Zinc finger protein 609	Znf609	RSATPKVRLVEPHSPSPSSKFSTKGLCKKKL	LVEPHsPsPsSKFST
	-0.650929	T	2		___1	Casein kinase II substrate motif;MDC1 BRCT domain binding motif;PKA kinase substrate motif;PKC kinase substrate motif;Plk1 PBD domain binding motif	+	HTP							0.982311	2.7609e-13	137.75	123.94	118.21	0.49076	8.75743	268690000	303350000	86	NaN	8.75743	O55003	86	O55003	O55003	BCL2/adenovirus E1B 19 kDa protein-interacting protein 3	Bnip3	NRAEIDSHSFGEKNSTLSEEDYIERRREVES	sFGEkNstLsEEDyI
	-0.648462	S	3		___1	ERK1,2 kinase substrate motif;G protein-coupled receptor kinase 1 substrate motif;GSK-3, ERK1, ERK2, CDK5 substrate motif;PKA kinase substrate motif;PKC kinase substrate motif;WW domain binding motif	+	HTP							0.999843	0.00179974	44.312	40.334	44.312	-0.24218	7.6354	18253000	24939000	212	NaN	7.6354	Q03347;G3UWD2;Q3UM65;Q03347-4;Q03347-5	212;212;226;226;212	Q03347	Q03347	Runt-related transcription factor 1	Runx1	RLSELEQLRRTAMRVSPHHPAPTPNPRASLN	RRTAMRVsPHHPAPT
	-0.64539	S	2		___1	Casein kinase II substrate motif;Cdc2 kinase substrate motif;CDK kinase substrate motif;CDK1,2,4,6 kinase substrate motif;CDK4 kinase substrate motif;ERK1,2 kinase substrate motif;GSK-3, ERK1, ERK2, CDK5 substrate motif;MAPKAPK2 kinase substrate motif;WW domain binding motif	+	CST;HTP							0.783196	0.000145848	93.381	79.104	93.381	0.14771	7.5776	18390000	19420000	22	NaN	7.5776	P48678-2;P48678;D3YUF7	22;22;22	P48678-2	P48678-2	Prelamin-A/C;Lamin-A/C	Lmna	RRATRSGAQASSTPLSPTRITRLQEKEDLQE	QAsstPLsPtRItRL	ERK2
	-0.645096	S	2		___1	14-3-3 domain binding motif;Akt kinase substrate motif;Calmodulin-dependent protein kinase II substrate motif;Casein kinase II substrate motif;MAPKAPK1 kinase substrate motif;MAPKAPK2 kinase substrate motif;MDC1 BRCT domain binding motif;p70 Ribosomal S6 kinase substrate motif;Phosphorylase kinase substrate motif;PKA kinase substrate motif;PKC kinase substrate motif;Plk1 PBD domain binding motif	+	CST;HTP							0.996714	0.00141039	84.507	12.167	84.507	0.16081	7.87827	41295000	34262000	795	NaN	7.87827	Q5DQR4-5;Q5DQR4-4;Q5DQR4-2;Q5DQR4-3;Q5DQR4	795;738;762;795;819	Q5DQR4-5	Q5DQR4-5	Syntaxin-binding protein 5-like	Stxbp5l	TEETRENSYNRSRSSSISSIDKDSKEAITAL	YNRSRSssIssIDKD
	-0.641806	S	3		___1	14-3-3 domain binding motif;Aurora-A kinase substrate motif;Calmodulin-dependent protein kinase II substrate motif;Casein kinase II substrate motif;MAPKAPK2 kinase substrate motif;PAK2 kinase substrate motif;Phosphorylase kinase substrate motif;PKA kinase substrate motif;PKC epsilon kinase substrate motif;PKC kinase substrate motif	+	CST;HTP							0.999998	1.0315e-06	87.533	87.533	87.533	0.34475	7.72875	26083000	27466000	1175	NaN	7.72875	Q9QY06;E9PZW8;Q9QY06-2;Q9QY06-3;E9QKV6;E9PWZ6	1175;1175;1204;1175;1175;1175	Q9QY06	Q9QY06	Unconventional myosin-IXb	Myo9b	CREESSTHREPSRRASLEIGESFPEGTKGPR	REPSRRAsLEIGEsF
	-0.640007	T	3		___1	Casein kinase II substrate motif;Growth associated histone HI kinase substrate motif;GSK-3, ERK1, ERK2, CDK5 substrate motif;WW domain binding motif	+	HTP							0.999846	6.08727e-10	104.52	92.879	104.52	-0.33905	8.70328	240640000	264350000	81	NaN	8.70328	Q8BJU0-2;Q8BJU0	81;82	Q8BJU0-2	Q8BJU0-2	Small glutamine-rich tetratricopeptide repeat-containing protein alpha	Sgta	TSSKEMPQDPRAPDRTPPSEEDSAEAERLKT	DPRAPDRtPPsEEDS
	-0.639827	S	2		___1	ERK1,2 kinase substrate motif;GSK-3, ERK1, ERK2, CDK5 substrate motif;WW domain binding motif	+	HTP							1	2.04561e-05	81.368	81.368	67.418	0.57943	8.42211	129830000	134480000	25	NaN	8.42211	Q9QZM0	25	Q9QZM0	Q9QZM0	Ubiquilin-2	Ubqln2	PPRPSRGPAAAPGAASPPAEPKIIKVTVKTP	AAAPGAAsPPAEPkI
	-0.638658	S	3		___1	b-Adrenergic Receptor kinase substrate motif;Casein kinase I substrate motif;Casein kinase II substrate motif;G protein-coupled receptor kinase 1 substrate motif;PKA kinase substrate motif;PKC kinase substrate motif	+	CST;HTP							1	1.50126e-26	142.32	135.23	95.153	-0.15148	8.86301	335530000	393940000	116	NaN	8.86301	Q9R020-2;E9PUD0;Q9R020;D3Z4U0;D3Z4T9	116;116;153;163;163	Q9R020-2	Q9R020-2	Zinc finger Ran-binding domain-containing protein 2	Zranb2	AVGPASILKEVEDKESEGEEEDEDEDLSKYK	KEVEDKEsEGEEEDE
	-0.637065	S	2		___1	b-Adrenergic Receptor kinase substrate motif	+	HTP							0.992253	0.000297324	81.807	73.675	72.568	-0.22563	7.65223	16934000	27965000	124	NaN	7.65223	B1AZ85;Q8R550-8;E9Q0C1;Q8R550-3;Q8R550-2;Q8R550	124;183;146;146;183;227	B1AZ85	B1AZ85	SH3 domain-containing kinase-binding protein 1	Sh3kbp1	EQLSKSSLRETTGSESDGGDSSSTKSEGANG	RETtGsEsDGGDSSS
	-0.637042	S	3		___1		+	HTP							0.927603	3.59319e-10	107.06	100.02	107.06	0.30256	7.87206	31235000	43249000	904	NaN	7.87206	S4R294;S4R2J9;Q3TLH4-5;Q3TLH4	904;902;904;904	S4R294	S4R294	Protein PRRC2C	Prrc2c	ALESQPARKRSVSHGSNHAQNAEEQRNEPSV	KRsVsHGsNHAQNAE
	-0.63377	S	2		___1	ERK1,2 kinase substrate motif;G protein-coupled receptor kinase 1 substrate motif;Growth associated histone HI kinase substrate motif;GSK-3, ERK1, ERK2, CDK5 substrate motif;PKA kinase substrate motif;PKC kinase substrate motif;WW domain binding motif	+	HTP							0.991673	0.0117195	71.531	52.432	71.531	-0.71335	7.88755	47804000	29384000	1507	NaN	7.88755	Q8C0T5-2;Q8C0T5	1507;1507	Q8C0T5-2	Q8C0T5-2	Signal-induced proliferation-associated 1-like protein 1	Sipa1l1	IAHTRLRASTRDLQASPKPTSKSTIEEDLKK	STRDLQAsPKPTSKS
	-0.627694	S	3		___2	14-3-3 domain binding motif;Calmodulin-dependent protein kinase II substrate motif;Casein kinase II substrate motif;DNA dependent Protein kinase substrate motif;Pim1 kinase substrate sequence;PKA kinase substrate motif;PKC epsilon kinase substrate motif;PKC kinase substrate motif;ZIP kinase substrate motif	+	CST;HTP							1	2.489e-09	102.98	102.98	97.256	0.7826	8.3126	93195000	112200000	395	NaN	8.3126	P51612	395	P51612	P51612	DNA repair protein complementing XP-C cells homolog	Xpc	KRGTGTAGSRQRRKPSCSEGEEAEQKVQGRP	SRQRRKPsCsEGEEA
	-0.627694	S	3		___2	Casein kinase II substrate motif;G protein-coupled receptor kinase 1 substrate motif;PKA kinase substrate motif	+	HTP							1	2.489e-09	102.98	102.98	97.256	0.7826	8.33409	97786000	118030000	397	NaN	8.33409	P51612	397	P51612	P51612	DNA repair protein complementing XP-C cells homolog	Xpc	GTGTAGSRQRRKPSCSEGEEAEQKVQGRPHA	QRRKPsCsEGEEAEQ
	-0.626625	S	3		___1	b-Adrenergic Receptor kinase substrate motif;Casein kinase II substrate motif;Pyruvate dehydrogenase kinase substrate motif	+	HTP							0.999966	7.31357e-18	116.38	116.38	106.88	-0.24286	7.95019	38006000	51157000	280	NaN	7.95019	Q4KL52;Q9DAZ9	280;280	Q4KL52	Q4KL52	Zinc finger FYVE domain-containing protein 19	Zfyve19	QDPSRVTLQDYHLPDSDEDEETAIQRVMQQL	QDYHLPDsDEDEETA
	-0.625756	S	3		___1	b-Adrenergic Receptor kinase substrate motif;BARD1 BRCT domain binding motif;Casein kinase I substrate motif;Casein kinase II substrate motif;G protein-coupled receptor kinase 1 substrate motif;GSK3 kinase substrate motif	+	CST;HTP							0.995849	1.69734e-17	109.44	109.44	101.39	0.146	8.18161	59952000	91968000	13	NaN	8.18161	H3BJZ1;Q9DB70	13;13	H3BJZ1	H3BJZ1	FUN14 domain-containing protein 1	Fundc1	___MASRNPPPQDYESDDESYEVLDLTEYAR	PPPQDyEsDDEsyEV
	-0.622621	S	2		___1	ERK1,2 kinase substrate motif;GSK-3, ERK1, ERK2, CDK5 substrate motif;PKA kinase substrate motif;WW domain binding motif	+	HTP							0.999181	1.15765e-08	99.344	99.344	99.344	0.78263	8.51194	154610000	170430000	1794	NaN	8.51194	Q9QX47-2;Q9QX47-4;H9KV01;H9KV15;Q9QX47-3;Q9QX47;H9KV00	1794;1754;1794;1794;1754;1794;1794	Q9QX47-2	Q9QX47-2	Protein SON	Son	GPLLASEVERDKSAASPVVISIPERASESSS	ERDKsAAsPVVIsIP
	-0.621067	S	3		___1	BARD1 BRCT domain binding motif;Casein kinase II substrate motif;G protein-coupled receptor kinase 1 substrate motif	+	HTP							0.801509	3.44744e-11	88.239	86.347	88.239	-0.53801	7.46292	8780200	20254000	16	NaN	7.46292	P46935;Q3V335;V9GWV8	16;16;16	P46935	P46935	E3 ubiquitin-protein ligase NEDD4	Nedd4	MSSDMAADESEAPVLSEDEVWEFCLDKTEDG	ESEAPVLsEDEVWEF
	-0.619891	S	3		___1	14-3-3 domain binding motif;Calmodulin-dependent protein kinase II substrate motif;Casein kinase II substrate motif;G protein-coupled receptor kinase 1 substrate motif;Phosphorylase kinase substrate motif;PKA kinase substrate motif;PKC kinase substrate motif	+	HTP							0.98379	1.00991e-09	101.38	82.121	94.632	0.12642	7.37809	10803000	13079000	226	NaN	7.37809	E9Q1P8	226	E9Q1P8	E9Q1P8	Interferon regulatory factor 2-binding protein 2	Irf2bp2	LGAQPAELGTHKRPASVSSAAAEHEAREPSK	GTHKRPAsVSsAAAE
	-0.618517	S	2		___1	Casein kinase II substrate motif;ERK1,2 kinase substrate motif;GSK-3, ERK1, ERK2, CDK5 substrate motif;PKA kinase substrate motif;PKC kinase substrate motif;WW domain binding motif	+	CST;HTP							0.995818	4.68487e-07	107.69	90.126	107.69	-0.49629	7.69614	14524000	35151000	1915	NaN	7.69614	Q8BI84;Q8BI84-3;J3KMH5	1915;766;766	Q8BI84	Q8BI84	Melanoma inhibitory activity protein 3	Mia3	RDSLPSGPREEAKPASPSSVQDRSQASKPTP	REEAKPAsPssVQDR
	-0.617565	S	2		___2	Casein kinase II substrate motif;MAPKAPK2 kinase substrate motif;PKA kinase substrate motif;PKC kinase substrate motif	+	HTP							1	1.21651e-21	127.16	123.3	127.16	-1.1558	7.90736	33071000	47719000	5522	NaN	7.90736	E9Q616	5522	E9Q616	E9Q616		Ahnak	ASISGSKGDLKSSKASLGSLEGEVEAEASSP	DLKssKAsLGsLEGE
	-0.617565	S	2		___2	Casein kinase II substrate motif	+	HTP							1	1.21651e-21	127.16	123.3	127.16	-1.1558	7.90736	33071000	47719000	5525	NaN	7.90736	E9Q616	5525	E9Q616	E9Q616		Ahnak	SGSKGDLKSSKASLGSLEGEVEAEASSPKGK	ssKAsLGsLEGEVEA	mTOR
	-0.616282	S	2		___1	ERK1,2 kinase substrate motif;GSK-3, ERK1, ERK2, CDK5 substrate motif;WW domain binding motif	+	HTP							0.757785	0.0118551	53.237	39.837	53.237	1.0007	6.9999	5540200	4457600	321	NaN	6.9999	Q9JI10-2;Q9JI10	321;391	Q9JI10-2	Q9JI10-2	Serine/threonine-protein kinase 3;Serine/threonine-protein kinase 3 36kDa subunit;Serine/threonine-protein kinase 3 20kDa subunit	Stk3	EEEEEEDGTMKRNATSPQVQRPSFMDYFDKQ	TMKRNAtsPQVQRPs
	-0.607089	S	2		___1	14-3-3 domain binding motif;Calmodulin-dependent protein kinase II substrate motif;Casein kinase II substrate motif;G protein-coupled receptor kinase 1 substrate motif;GSK3 kinase substrate motif;MAPKAPK2 kinase substrate motif;MDC1 BRCT domain binding motif;Pim1 kinase substrate sequence;PKA kinase substrate motif;PKC epsilon kinase substrate motif;PKC kinase substrate motif;Plk1 PBD domain bind…	+	CST;HTP;LTP							0.972595	3.55117e-11	124.29	94.983	124.29	1.0143	8.61616	207020000	206180000	93	NaN	8.61616	Q61686	93	Q61686	Q61686	Chromobox protein homolog 5	Cbx5	NNKPREKSEGNKRKSSFSNSADDIKSKKKRE	EGNKRkssFsNsADD
	-0.606869	S	2		___1	Casein kinase II substrate motif;DNA dependent Protein kinase substrate motif;ERK1,2 kinase substrate motif;Growth associated histone HI kinase substrate motif;GSK-3, ERK1, ERK2, CDK5 substrate motif;PKA kinase substrate motif;PKC kinase substrate motif;WW domain binding motif	+	HTP							0.999999	0.00430953	83.692	53.78	83.692	-2.5563	7.0825	6075500	6016800	1082	NaN	7.0825	P53564-4;H3BKF6;P53564-3;H3BK24;P53564;H3BJQ9;P53564-2;E9QKE9;H3BLS0;P53564-5	1082;1139;1254;1254;1265;1267;1163;1176;1259;210	P53564-4	P53564-4	Homeobox protein cut-like 1	Cux1	EKEALKRAYQQKPYPSPKTIEELATQLNLKT	YQQkPYPsPKTIEEL
	-0.606232	S	2		___1	Casein kinase II substrate motif;ERK1,2 kinase substrate motif;G protein-coupled receptor kinase 1 substrate motif;GSK-3, ERK1, ERK2, CDK5 substrate motif;MAPKAPK2 kinase substrate motif;WW domain binding motif	+	HTP							0.966814	1.35357e-05	83.758	76.854	83.758	0.4092	7.82385	31947000	34712000	569	NaN	7.82385	Q69Z38	569	Q69Z38	Q69Z38	Pseudopodium-enriched atypical kinase 1	Peak1	PNVPPRKNCHKSAPTSPTATNISSKTIPVKS	CHKsAPTsPtATNIS
	-0.605881	S	4		___1	BARD1 BRCT domain binding motif;Casein kinase I substrate motif;Casein kinase II substrate motif;G protein-coupled receptor kinase 1 substrate motif	+	CST;HTP							1	2.68104e-74	191.59	185.04	154.71	-0.23663	9.86593	2535700000	4808200000	509	NaN	9.86593	Q6DFW4	509	Q6DFW4	Q6DFW4	Nucleolar protein 58	Nop58	KKKKDKKKHIKEEPLSEEEPCTSTAVPSPEK	HIKEEPLsEEEPCts
	-0.604915	S	2		___1	Casein kinase II substrate motif;DNA dependent Protein kinase substrate motif;ERK1,2 kinase substrate motif;Growth associated histone HI kinase substrate motif;GSK-3, ERK1, ERK2, CDK5 substrate motif;PKA kinase substrate motif;PKC kinase substrate motif;WW domain binding motif	+	HTP							0.996665	1.01402e-28	151.21	143.89	142.23	-0.55096	8.51778	136240000	193200000	80	NaN	8.51778	B7ZCT0;Q8BFU4;Q9CX84;B7ZCT1	80;58;80;107	B7ZCT0	B7ZCT0	Regulator of G-protein signaling 19	Rgs19	SKLQPLPSCEVCTPPSPKEVQSWAQSFDKLM	CEVCTPPsPKEVQSW
	-0.604279	S	2		___1	14-3-3 domain binding motif;Calmodulin-dependent protein kinase II substrate motif;Casein kinase II substrate motif;MAPKAPK1 kinase substrate motif;Pim1 kinase substrate sequence;PKA kinase substrate motif;PKC epsilon kinase substrate motif;PKC kinase substrate motif	+	CST;HTP							1	3.49132e-44	174.2	171.13	162.39	0.82175	8.57274	161630000	212260000	1537	NaN	8.57274	Q64511	1537	Q64511	Q64511	DNA topoisomerase 2-beta	Top2b	TTPKGKGRGAKKRKASGSENEGDYNPGRKPS	GAKKRkAsGsENEGD
	-0.603051	S	2		___1	Casein kinase II substrate motif;ERK1,2 kinase substrate motif;GSK-3, ERK1, ERK2, CDK5 substrate motif;MAPKAPK2 kinase substrate motif;MDC1 BRCT domain binding motif;PKA kinase substrate motif;PKC kinase substrate motif;Plk1 PBD domain binding motif;WW domain binding motif	+	HTP							0.993172	0.000115725	72.681	59.83	69.92	0.050106	8.50512	141350000	178630000	51	NaN	8.50512	Q5FWK3;A2AH25	51;91	Q5FWK3	Q5FWK3	Rho GTPase-activating protein 1	Arhgap1	DEMPDFPKSDDSKSSSPEPVTHLKWDDPYYD	sDDsKsssPEPVtHL
	-0.602307	T	2		___1	Calmodulin-dependent protein kinase II substrate motif;Calmodulin-dependent protein kinase IV substrate motif;Chk1 kinase substrate motif;G protein-coupled receptor kinase 1 substrate motif;GSK-3, ERK1, ERK2, CDK5 substrate motif;PKA kinase substrate motif;PKC kinase substrate motif;WW domain binding motif	+	CST;HTP							0.982953	0.000760479	68.42	68.42	68.42	0.63272	7.59221	18126000	20977000	847	NaN	7.59221	P27546-3;P27546-2;E9PZ43;E9QPW8;P27546;E9PWC0;P27546-4;F7CK47	847;847;694;847;847;694;695;1308	P27546-3	P27546-3	Microtubule-associated protein 4;Microtubule-associated protein	Map4	SRSKTTSASSVKRNTTPTGAAPPAGMTSTRV	ssVKRNttPtGAAPP
	-0.602044	S	3		___1	BARD1 BRCT domain binding motif;Casein kinase II substrate motif	+	CST;HTP							0.999999	3.23996e-115	226.81	213.17	172.42	0.49903	9.94367	3975400000	4808100000	181	NaN	9.94367	O55022	181	O55022	O55022	Membrane-associated progesterone receptor component 1	Pgrmc1	HVGKLLKEGEEPTVYSDDEEPKDETARKNE_	GEEPtVysDDEEPKD	P38A
	-0.600424	S	2		___1	14-3-3 domain binding motif;Calmodulin-dependent protein kinase II substrate motif;ERK1,2 kinase substrate motif;GSK-3, ERK1, ERK2, CDK5 substrate motif;PKA kinase substrate motif;PKC epsilon kinase substrate motif;PKC kinase substrate motif;WW domain binding motif	+	HTP							1	0.000139679	93.859	66.846	93.859	0.20707	8.3641	102870000	128390000	124	NaN	8.3641	O70469	124	O70469	O70469	Docking protein 2	Dok2	IQAICLLAFPGQRKGSPGLEEKSGSPCMEEN	FPGQRKGsPGLEEKS
	-0.598675	S	2		___1	14-3-3 domain binding motif;Calmodulin-dependent protein kinase II substrate motif;Casein kinase II substrate motif;G protein-coupled receptor kinase 1 substrate motif;PAK2 kinase substrate motif;PKA kinase substrate motif;PKA, PKG kinase substrate motif;PKC epsilon kinase substrate motif;PKC kinase substrate motif;PKG kinase substrate motif	+	HTP							0.972554	0.0594608	63.864	33.04	63.864	0.64932	7.31001	9284800	11133000	383	NaN	7.31001	Q9D620;E9Q8L9	383;383	Q9D620	Q9D620	Rab11 family-interacting protein 1	Rab11fip1	KEPGEGGGTSSDRRLSDSSTKDSMKSMSLPS	TSSDRRLsDSStkDS
	-0.597103	S	3		___1	14-3-3 domain binding motif;Calmodulin-dependent protein kinase II substrate motif;Casein kinase II substrate motif;G protein-coupled receptor kinase 1 substrate motif;GSK3 kinase substrate motif;MAPKAPK2 kinase substrate motif;PAK2 kinase substrate motif;PKA kinase substrate motif;PKC epsilon kinase substrate motif;PKC kinase substrate motif	+	HTP							0.973483	1.30034e-18	123.17	103.42	83.047	1.1388	7.98754	37103000	60067000	88	NaN	7.98754	Q3UZ39;G5E8E1;Q3UZ39-2;E9Q9T1	88;98;236;236	Q3UZ39	Q3UZ39	Leucine-rich repeat flightless-interacting protein 1	Lrrfip1	AATLASLGGTSSRRGSGDTSISMDTEASIRE	GtssRRGsGDTsIsM
	-0.596405	S	2		___1	14-3-3 domain binding motif;Calmodulin-dependent protein kinase I substrate motif;Calmodulin-dependent protein kinase II substrate motif;Calmodulin-dependent protein kinase IV substrate motif;Chk1 kinase substrate motif;ERK1,2 kinase substrate motif;GSK-3, ERK1, ERK2, CDK5 substrate motif;PKA kinase substrate motif;PKC kinase substrate motif;WW domain binding motif	+	HTP							0.994098	0.0482319	55.353	35.515	55.353	-0.50104	7.56399	20403000	16240000	749	NaN	7.56399	Q62504-3;A2ADB1;Q62504-2;A2ADB0;Q62504	749;727;726;750;749	Q62504-3	Q62504-3	Msx2-interacting protein	Spen	ESDRDHERRPIERSQSPVHLRRPQSPGVSPA	RPIERsQsPVHLRRP
	-0.593028	S	2		___1	Casein kinase II substrate motif;G protein-coupled receptor kinase 1 substrate motif;MAPKAPK2 kinase substrate motif;PKA kinase substrate motif;PKC kinase substrate motif;Pyruvate dehydrogenase kinase substrate motif									0.999999	0.00175465	71.279	44.13	71.279	0.33519	8.4613	123540000	165730000	193	NaN	8.4613	E9Q3G8	193	E9Q3G8	E9Q3G8		Nup153	DDDNISTTSGFSSRASEKDIAVSKNTSLPPL
	-0.591701	S	2		___1	14-3-3 domain binding motif;b-Adrenergic Receptor kinase substrate motif;Calmodulin-dependent protein kinase II substrate motif;Casein kinase II substrate motif;MAPKAPK2 kinase substrate motif;Phosphorylase kinase substrate motif;PKA kinase substrate motif;PKC kinase substrate motif	+	HTP							0.998307	5.57737e-07	105.19	94.713	105.19	0.72708	7.64744	18216000	26191000	465	NaN	7.64744	S4R1L5;H9KUX8;O88738-3;S4R2P8;O88738-2;O88738	465;465;493;493;493;493	S4R1L5	S4R1L5	Baculoviral IAP repeat-containing protein 6	Birc6	DLLEDSDSEEHSRSDSVTGHTSQKEAMEVSL	EEHsRsDsVtGHTSQ
	-0.589008	S	2		___1	Casein kinase II substrate motif;G protein-coupled receptor kinase 1 substrate motif;Phosphorylase kinase substrate motif;PKA kinase substrate motif;PKC kinase substrate motif	+	HTP							0.986474	0.0247179	58.981	35.661	58.981	-2.059	7.27825	10203000	8774600	60	NaN	7.27825	Q80WQ6	60	Q80WQ6	Q80WQ6	Inactive rhomboid protein 2	Rhbdf2	MLPERRKNPAYLKSVSLQEPRGRWQEGAEKR	PAYLKSVsLQEPRGR
	-0.58853	S	3		___2	b-Adrenergic Receptor kinase substrate motif;Casein kinase II substrate motif;MAPKAPK2 kinase substrate motif	+	HTP							0.976166	9.82337e-17	72.116	71.108	72.116	-1.0277	8.8004	234490000	397050000	1229	NaN	8.8004	Q8BTI8;Q8BTI8-2;Q8BTI8-3	1229;1133;1229	Q8BTI8	Q8BTI8	Serine/arginine repetitive matrix protein 2	Srrm2	SLSPEHKEMPGSNIESSPEVEERPAVLSALD	MPGsNIEssPEVEER
	-0.587121	S	2		___1	Casein kinase II substrate motif;ERK1,2 kinase substrate motif;GSK-3, ERK1, ERK2, CDK5 substrate motif;MAPKAPK2 kinase substrate motif;WW domain binding motif	+	CST;HTP							1	3.4764e-05	63.181	55.049	52.891	0.074018	7.64622	5395100	38886000	425	NaN	7.64622	Q8K327	425	Q8K327	Q8K327	Chromosome alignment-maintaining phosphoprotein 1	Champ1	RPGPPLSPEIRSPAGSPELKKPSSSPDLWKV	EIRsPAGsPELKKPs
	-0.586774	T	2		___1	Calmodulin-dependent protein kinase II substrate motif;G protein-coupled receptor kinase 1 substrate motif;MDC1 BRCT domain binding motif;PKC kinase substrate motif;Plk1 PBD domain binding motif	+	CST;HTP;LTP							0.960856	2.75531e-23	128.38	128.38	119.41	0.14614	8.63165	190200000	238000000	505	NaN	8.63165	P28867;P28867-2;Q1MX43;Q1MX42;Q1MX41;Q1MX40	505;531;390;416;390;416	P28867	P28867	Protein kinase C delta type;Protein kinase C delta type regulatory subunit;Protein kinase C delta type catalytic subunit	Prkcd	FGMCKENIFGEGRASTFCGTPDYIAPEILQG	FGEGRAstFCGtPDY
	-0.585302	S	2		___1	14-3-3 domain binding motif;Akt kinase substrate motif;AMP-activated protein kinase 2 substrate motif;Calmodulin-dependent protein kinase II substrate motif;Casein kinase II substrate motif;G protein-coupled receptor kinase 1 substrate motif;MAPKAPK1 kinase substrate motif;PKA kinase substrate motif;PKC kinase substrate motif	+	CST;HTP							0.962089	0.00295022	78.516	76.1	49.149	0.62313	8.27156	79177000	107700000	700	NaN	8.27156	O35691;Q3TUQ5	700;701	O35691	O35691	Pinin	Pnn	GSKDKSSRPDRKRSISESSRSGKRSSRSERD	PDRKRsIsEssRSGK
	-0.582858	S	3		___1	14-3-3 domain binding motif;Calmodulin-dependent protein kinase II substrate motif;Calmodulin-dependent protein kinase IV substrate motif;Casein kinase II substrate motif;Chk1 kinase substrate motif;DNA dependent Protein kinase substrate motif;Pim1 kinase substrate sequence;PKA kinase substrate motif;PKA, PKG kinase substrate motif;PKC epsilon kinase substrate motif;PKC kinase substrate motif;PKG…	+	CST;HTP							0.998944	3.65918e-17	139.12	115.59	139.12	-0.48196	8.36246	93977000	136410000	7	NaN	8.36246	Q8K352	7	Q8K352	Q8K352	SAM and SH3 domain-containing protein 3	Sash3	_________MLRRKPSNASDKEPTQKKKLSL	_MLRRKPsNAsDKEP
	-0.581799	S	2		___1	b-Adrenergic Receptor kinase substrate motif;Casein kinase I substrate motif;MAPKAPK2 kinase substrate motif									0.76972	1.33518e-05	82.349	70.448	50.376	-0.5863	7.51784	14673000	18277000	181	NaN	7.51784	Q8C4Q9	181	Q8C4Q9	Q8C4Q9	Transmembrane protein 154	Tmem154	LKEEKEPNPSPSDNES_______________
	-0.579534	S	2		___1	Casein kinase I substrate motif;Cdc2 kinase substrate motif;CDK kinase substrate motif;CDK1,2,4,6 kinase substrate motif;DNA dependent Protein kinase substrate motif;ERK1,2 kinase substrate motif;GSK-3, ERK1, ERK2, CDK5 substrate motif;PKA kinase substrate motif;PKC kinase substrate motif;WW domain binding motif	+	HTP							0.999957	2.6684e-05	92.939	69.005	92.939	0.30441	8.48646	139940000	166570000	646	NaN	8.48646	Q99KG3-2;Q99KG3-3;Q99KG3	646;722;723	Q99KG3-2	Q99KG3-2	RNA-binding protein 10	Rbm10	HTSMDLPKLASDDRPSPPRGLVAAYSGESDS	LAsDDRPsPPRGLVA
	-0.578348	S	2		___1	14-3-3 domain binding motif;Akt kinase substrate motif;AMP-activated protein kinase 2 substrate motif;Calmodulin-dependent protein kinase II substrate motif;DNA dependent Protein kinase substrate motif;ERK1,2 kinase substrate motif;GSK-3, ERK1, ERK2, CDK5 substrate motif;MAPKAPK1 kinase substrate motif;PKA kinase substrate motif;PKC kinase substrate motif;WW domain binding motif	+	CST;HTP							1	0.000410604	107.69	79.516	86.136	-0.30395	8.61089	184860000	223360000	431	NaN	8.61089	Q76LS9-2;Q76LS9;Q76LS9-3	431;440;271	Q76LS9-2	Q76LS9-2	Protein FAM63A	Fam63a	YQQQQAVQPVRTRAPSPQGRGATSGRPAGER	PVRtRAPsPQGRGAT
	-0.575766	S	3		___1	14-3-3 domain binding motif;b-Adrenergic Receptor kinase substrate motif;Calmodulin-dependent protein kinase II alpha substrate motif;Calmodulin-dependent protein kinase II substrate motif;Calmodulin-dependent protein kinase IV substrate motif;Casein kinase II substrate motif;Chk1 kinase substrate motif;Phosphorylase kinase substrate motif;PKA kinase substrate motif;PKC kinase substrate motif	+	HTP							1	2.03286e-15	125.92	108.03	125.92	-0.25049	8.40403	105570000	147950000	222	NaN	8.40403	E9PX56;F7CC56;Q9ESK9	222;140;222	E9PX56	E9PX56	RB1-inducible coiled-coil protein 1	Rb1cc1	CLTRHSYRECLGRPDSLNEHEGSEKAEMKRS	ECLGRPDsLNEHEGS
	-0.573317	S	2		___2	14-3-3 domain binding motif;Akt kinase substrate motif;ATM kinase substrate motif;Calmodulin-dependent protein kinase II substrate motif;Casein kinase II substrate motif;DNA dependent Protein kinase substrate motif;MAPKAPK1 kinase substrate motif;PKA kinase substrate motif;PKC kinase substrate motif	+	CST;HTP							0.996284	1.13532e-07	117.55	109.45	117.55	2.1306	8.38933	120260000	124830000	297	NaN	8.38933	Z4YMB8;Q58A65-6;Q58A65-3;F8WH31;E9PUD1;Q58A65-4;Q58A65-5;Q58A65-2;Q58A65;F6SH61;F6WNT4	297;551;577;578;578;573;716;716;730;566;366	Z4YMB8	Z4YMB8	C-Jun-amino-terminal kinase-interacting protein 4	Spag9	DIAGLDTEGSKQRSASQSSLDKLDQELKEQQ	GSKQRsAsQssLDKL
	-0.569479	S	2		___1	ERK1,2 kinase substrate motif;GSK-3, ERK1, ERK2, CDK5 substrate motif;PKA kinase substrate motif;PKC kinase substrate motif;WW domain binding motif	+	CST;HTP							0.997575	0.00342187	51.073	51.073	51.073	-0.68073	7.57207	17936000	19395000	281	NaN	7.57207	F8WIN6;Q8CHP6-2;E9QPT4;D3YY34;B7ZNA5;Q8CHP6	281;248;248;236;281;269	F8WIN6	F8WIN6	Polyhomeotic-like protein 3	Phc3	KISQRDPSPESKKGGSPGLESRSTAVTRTSS	PESKKGGsPGLESRS
	-0.566699	S	3		___1	ERK1,2 kinase substrate motif;G protein-coupled receptor kinase 1 substrate motif;GSK-3, ERK1, ERK2, CDK5 substrate motif;MAPKAPK2 kinase substrate motif;WW domain binding motif	+	HTP							0.926561	2.18498e-11	62.862	62.862	48.943	0.69806	7.9104	44690000	36668000	25	NaN	7.9104	H3BLB4;H3BJU9;H3BLL3;Q921G6	25;25;25;25	H3BLB4	H3BLB4	Leucine-rich repeat and calponin homology domain-containing protein 4	Lrch4	AAGGEEAAASVSLPGSPGLPGSRSAERALEE	AsVsLPGsPGLPGSR
	-0.563902	S	3		___1	b-Adrenergic Receptor kinase substrate motif;Casein kinase I substrate motif;Casein kinase II substrate motif;ERK1,2 kinase substrate motif;GSK-3, ERK1, ERK2, CDK5 substrate motif;Pyruvate dehydrogenase kinase substrate motif;WW domain binding motif	+	HTP							0.946069	2.16301e-06	69.398	69.398	58.952	-0.4079	8.14977	63683000	77494000	311	NaN	8.14977	O70551	311	O70551	O70551	SRSF protein kinase 1	Srpk1	SGPGQKRPNKQEESESPVDRPLTENPPNKMT	NKQEEsEsPVDRPLT
	-0.562794	S	2		___2	ATM kinase substrate motif;Casein kinase II substrate motif;DNA dependent Protein kinase substrate motif;MAPKAPK2 kinase substrate motif;PKA kinase substrate motif;PKC kinase substrate motif	+	CST;HTP							0.967743	0.00214641	45.618	37.304	45.618	1.3388	6.69153	2274800	2640300	50	NaN	6.69153	Q5SVQ0-4;Q5SVQ0-2;Q5SVQ0-3;Q5SVQ0	50;52;50;52	Q5SVQ0-4	Q5SVQ0-4	Histone acetyltransferase KAT7	Kat7	TSRRSARVTRSSARLSQSSQDSSPVRNLPSF	tRsSARLsQssQDss
	-0.562794	S	2		___2	Cdc2 kinase substrate motif;CDK kinase substrate motif;CDK1,2,4,6 kinase substrate motif;ERK1,2 kinase substrate motif;Growth associated histone HI kinase substrate motif;GSK-3, ERK1, ERK2, CDK5 substrate motif;MAPKAPK2 kinase substrate motif;MDC1 BRCT domain binding motif;Plk1 PBD domain binding motif;WW domain binding motif	+	CST;HTP							0.992777	3.58188e-53	207.08	183.56	180.27	0.29645	8.65545	134110000	318210000	57	NaN	8.65545	Q5SVQ0-4;Q5SVQ0-2;Q5SVQ0-3;Q5SVQ0	57;59;57;59	Q5SVQ0-4	Q5SVQ0-4	Histone acetyltransferase KAT7	Kat7	VTRSSARLSQSSQDSSPVRNLPSFGTEEPAY	sQssQDssPVRNLPS
	-0.561303	S	2		___1	14-3-3 domain binding motif;Calmodulin-dependent protein kinase II substrate motif;Casein kinase II substrate motif;ERK1,2 kinase substrate motif;GSK-3, ERK1, ERK2, CDK5 substrate motif;MAPKAPK2 kinase substrate motif;PKA kinase substrate motif;PKC kinase substrate motif;WW domain binding motif	+	HTP							0.847901	0.0151172	55.011	41.856	52.112	-0.55572	7.64286	21672000	22269000	187	NaN	7.64286	Q3U1U8;Q9Z2U4	187;187	Q3U1U8	Q3U1U8	ETS-related transcription factor Elf-4	Elf4	KARKRNRKTKNNRSTSPVTDPSMPIRKKSKD	TKNNRsTsPVTDPsM
	-0.560622	S	2		___1	BARD1 BRCT domain binding motif;Casein kinase II substrate motif;G protein-coupled receptor kinase 1 substrate motif	+	HTP							1	2.10975e-10	123.68	111.41	104.97	0.44339	8.64895	196530000	249090000	100	NaN	8.64895	D3Z478;D3YYS7;Q9D0L8-2;Q9D0L8-3;Q9D0L8;D3Z4K1	100;100;100;100;100;100	D3Z478	D3Z478	mRNA cap guanine-N7 methyltransferase	Rnmt	DGGSAKRSKLERGDVSEDEPSLGRLNQTKRK	KLERGDVsEDEPSLG
	-0.5606	T	2		___1	Casein kinase II substrate motif;GSK-3, ERK1, ERK2, CDK5 substrate motif;PKA kinase substrate motif;WW domain binding motif	+	CST;HTP;LTP							0.999959	8.7983e-07	95.677	91.336	78.326	0.65104	8.10257	58967000	67675000	148	NaN	8.10257	P28667	148	P28667	P28667	MARCKS-related protein	Marcksl1	ACSDEGTAQEGKAAATPESQEPQAKGAEASA	QEGKAAAtPEsQEPQ
	-0.559664	S	3		___1	b-Adrenergic Receptor kinase substrate motif;Phosphorylase kinase substrate motif;PKA kinase substrate motif;PKC kinase substrate motif	+	HTP							1	2.66956e-18	142.39	100.77	142.39	-0.023161	8.44713	130930000	149050000	293	NaN	8.44713	Q8CH25-2;Q8CH25	293;311	Q8CH25-2	Q8CH25-2	SAFB-like transcription modulator	Sltm	DYEMNPNHKDGKKEDSVKGEPVEKEARESAK	KDGKKEDsVKGEPVE
	-0.55926	S	2		___2	MAPKAPK2 kinase substrate motif	+	CST;HTP							0.948325	0.0156411	84.653	67.025	84.653	-0.28916	8.01427	42433000	60912000	750	NaN	8.01427	D3Z079;Q8K400;D3Z2Q2;F6WXQ4;Q8K400-2	750;786;733;109;32	D3Z079	D3Z079	Syntaxin-binding protein 5	Stxbp5	VKDNSFSRSRSSSVTSIDKESRETISALHFC	sRsSsVtsIDKESRE
	-0.559197	S	2		___2	14-3-3 domain binding motif;Calmodulin-dependent protein kinase II substrate motif;Casein kinase II substrate motif;G protein-coupled receptor kinase 1 substrate motif;MAPKAPK1 kinase substrate motif;MDC1 BRCT domain binding motif;PAK2 kinase substrate motif;Pim1 kinase substrate sequence;PKA kinase substrate motif;PKC epsilon kinase substrate motif;PKC kinase substrate motif;Plk1 PBD domain bind…	+	CST;HTP							0.905534	2.66585e-05	84.753	75.098	83.964	1.1132	8.74596	200660000	356490000	1647	NaN	8.74596	Q8BTI8;Q8BTI8-2;Q8BTI8-3	1647;1551;1647	Q8BTI8	Q8BTI8	Serine/arginine repetitive matrix protein 2	Srrm2	IEPKTKSHTPPRRRSSRSSPELTRKARVSRR	tPPRRRssRssPELt
	-0.559175	S	4		___1	ERK1,2 kinase substrate motif;GSK-3, ERK1, ERK2, CDK5 substrate motif;MDC1 BRCT domain binding motif;Plk1 PBD domain binding motif;WW domain binding motif									0.801198	4.52633e-97	210.81	210.81	210.81	-0.25091	8.55985	153010000	209940000	588	NaN	8.55985	P35831	588	P35831	P35831	Tyrosine-protein phosphatase non-receptor type 12	Ptpn12	TAEEEAHDLTEHHNSSPLLKAPLSFTNPLHS
	-0.558857	S	2		___1	14-3-3 domain binding motif;Calmodulin-dependent protein kinase II substrate motif;G protein-coupled receptor kinase 1 substrate motif;GSK3 kinase substrate motif;MAPKAPK1 kinase substrate motif;PKA kinase substrate motif;PKC epsilon kinase substrate motif;PKC kinase substrate motif	+	CST;HTP							0.972127	0.000574061	70.628	70.628	65.809	-1.0082	7.31194	9840700	10668000	241	NaN	7.31194	P14152	241	P14152	P14152	Malate dehydrogenase, cytoplasmic	Mdh1	TVQQRGAAVIKARKLSSAMSAAKAIADHIRD	VIKARKLssAMsAAK
	-0.557412	S	3		___2	Casein kinase II substrate motif;ERK1,2 kinase substrate motif;GSK-3, ERK1, ERK2, CDK5 substrate motif;MDC1 BRCT domain binding motif;Plk1 PBD domain binding motif;WW domain binding motif	+	HTP							0.996657	9.82337e-17	72.116	71.108	72.116	-1.0277	8.8004	234490000	397050000	1230	NaN	8.8004	Q8BTI8;Q8BTI8-2;Q8BTI8-3	1230;1134;1230	Q8BTI8	Q8BTI8	Serine/arginine repetitive matrix protein 2	Srrm2	LSPEHKEMPGSNIESSPEVEERPAVLSALDQ	PGsNIEssPEVEERP
	-0.555905	S	3		___1	14-3-3 domain binding motif;Calmodulin-dependent protein kinase II substrate motif;Casein kinase II substrate motif;G protein-coupled receptor kinase 1 substrate motif;GSK3 kinase substrate motif;PAK2 kinase substrate motif;PKA kinase substrate motif;PKC epsilon kinase substrate motif;PKC kinase substrate motif	+	HTP							0.887138	5.27008e-05	70.986	70.986	70.986	-0.45319	7.74659	27021000	28773000	157	NaN	7.74659	Q8VC03	157	Q8VC03	Q8VC03	Echinoderm microtubule-associated protein-like 3	Eml3	RPVQPLQRSDTPRRNSSSSSSPSERPRQKLS	SDTPRRNsSSSsSPS
	-0.555375	S	2		___2	Casein kinase II substrate motif;PKA kinase substrate motif;PKC kinase substrate motif;Pyruvate dehydrogenase kinase substrate motif	+	HTP							0.998818	0.000244096	85.837	79.36	85.837	0.53983	8.04281	50348000	60014000	238	NaN	8.04281	Q569Z6;Q8BZN7	238;238	Q569Z6	Q569Z6	Thyroid hormone receptor-associated protein 3	Thrap3	WPDATTYGAGSASRASVSDLSPRERSPALKS	AGsASRAsVsDLsPR
	-0.555375	S	2		___2	Casein kinase II substrate motif;ERK1,2 kinase substrate motif;Growth associated histone HI kinase substrate motif;GSK-3, ERK1, ERK2, CDK5 substrate motif;PKA kinase substrate motif;PKC kinase substrate motif;WW domain binding motif	+	CST;HTP							1	1.80797e-12	149.23	133.6	149.23	0.033821	9.76019	2178600000	3578300000	243	NaN	9.76019	Q569Z6;Q8BZN7	243;243	Q569Z6	Q569Z6	Thyroid hormone receptor-associated protein 3	Thrap3	TYGAGSASRASVSDLSPRERSPALKSPLQSV	RAsVsDLsPRERsPA
	-0.555185	S	2		___2	Casein kinase II substrate motif;PKA kinase substrate motif;PKC kinase substrate motif;Pyruvate dehydrogenase kinase substrate motif	+	HTP;LTP							1	2.95136e-32	174.95	167.49	56.25	0.21199	10.2794	8218300000	10812000000	5	NaN	10.2794	Q61233;D3YZ25;D3YVW8;D3Z7D9;D3Z311	5;5;5;5;5	Q61233	Q61233	Plastin-2	Lcp1	___________MARGSVSDEEMMELREAFAK	___MARGsVsDEEMM
	-0.555185	S	2		___2	BARD1 BRCT domain binding motif;Casein kinase II substrate motif	+	HTP							1	0.000152169	95.822	83.903	56.25	0.21199	8.16471	59697000	86423000	7	NaN	8.16471	Q61233;D3YZ25;D3YVW8;D3Z7D9;D3Z311	7;7;7;7;7	Q61233	Q61233	Plastin-2	Lcp1	_________MARGSVSDEEMMELREAFAKVD	_MARGsVsDEEMMEL
	-0.554697	S	3		___2	Casein kinase II substrate motif	+	HTP							0.996424	3.77924e-22	135.3	128.2	128.98	-0.39643	8.67612	196870000	277500000	482	NaN	8.67612	Q5U3K5	482	Q5U3K5	Q5U3K5	Rab-like protein 6	Rabl6	SLLPSDPMPSKNISLSSEEEAEGLAGHPRVA	PsKNIsLssEEEAEG
	-0.554528	S	2		___1	ERK1,2 kinase substrate motif;G protein-coupled receptor kinase 1 substrate motif;GSK3 kinase substrate motif;GSK-3, ERK1, ERK2, CDK5 substrate motif;MAPKAPK2 kinase substrate motif;PKA kinase substrate motif;PKC kinase substrate motif;WW domain binding motif	+	HTP							0.999977	1.91192e-67	198.67	183.51	198.67	0.097842	9.36425	1012500000	1300900000	428	NaN	9.36425	S4R2J8;S4R1B8;D3Z6Q9;S4R270	428;433;443;460	S4R2J8	S4R2J8	Bridging integrator 2	Bin2	PGSPEGSSQLCSPRASPDASSNPEPAETREK	QLCsPRAsPDASSNP
	-0.552495	S	2		___1	AMP-activated protein kinase substrate motif;Casein kinase II substrate motif;ERK1,2 kinase substrate motif;GSK-3, ERK1, ERK2, CDK5 substrate motif;PKA kinase substrate motif;PKC kinase substrate motif;WW domain binding motif	+	CST;HTP							0.861305	0.0302083	76.064	24.718	65.224	0.34915	9.03647	486480000	601150000	26	NaN	9.03647	Q62093	26	Q62093	Q62093	Serine/arginine-rich splicing factor 2	Srsf2	EGMTSLKVDNLTYRTSPDTLRRVFEKYGRVG	DNLtyRtsPDtLRRV
	-0.550359	S	2		___1	14-3-3 domain binding motif;Calmodulin-dependent protein kinase II substrate motif;Casein kinase II substrate motif;ERK1,2 kinase substrate motif;GSK-3, ERK1, ERK2, CDK5 substrate motif;PKA kinase substrate motif;PKC kinase substrate motif;WW domain binding motif	+	CST;HTP							0.999861	0.00044804	104.22	34.165	104.22	0.38368	8.65156	236690000	211600000	746	NaN	8.65156	Q8CDG3;Q8CDG3-2	746;746	Q8CDG3	Q8CDG3	Deubiquitinating protein VCIP135	Vcpip1	TEKLKQEQKGQPRTVSPSTIRDGPSSAPATP	KGQPRtVsPstIRDG
	-0.550233	T	4		___1	Casein kinase II substrate motif;G protein-coupled receptor kinase 1 substrate motif;Growth associated histone HI kinase substrate motif;GSK-3, ERK1, ERK2, CDK5 substrate motif;WW domain binding motif	+	CST;HTP							0.999494	5.19659e-13	85.937	85.937	85.937	-0.47544	8.1401	71957000	66115000	256	NaN	8.1401	Q3UZA1;Q3UZA1-2	256;226	Q3UZA1;Q3UZA1-2	Q3UZA1	CapZ-interacting protein	Rcsd1	RNTCNSTEKPEELVRTPEEANAGEKVGQNPD	KPEELVRtPEEANAG
	-0.54867	S	2		___1	Cdc2 kinase substrate motif;CDK kinase substrate motif;CDK1,2,4,6 kinase substrate motif;ERK1,2 kinase substrate motif;Growth associated histone HI kinase substrate motif;GSK-3, ERK1, ERK2, CDK5 substrate motif;PKA kinase substrate motif;PKC kinase substrate motif;WW domain binding motif	+	CST;HTP							1	1.5192e-07	110.26	84.437	71.269	-0.14234	8.53723	174390000	170130000	682	NaN	8.53723	Q5U4C3	682	Q5U4C3	Q5U4C3	Splicing factor, arginine/serine-rich 19	Scaf1	PDKAEPRAPSPAPAVSPKREVLYDSEGLSAD	PsPAPAVsPKREVLy
	-0.548522	T	4		___1	Casein kinase II substrate motif	+	CST;HTP							0.80587	5.47257e-12	65.073	65.073	65.073	0.51064	7.6592	15369000	30256000	137	NaN	7.6592	Q9CR29-2;Q9CR29	137;137	Q9CR29-2	Q9CR29-2	Coiled-coil domain-containing protein 43	Ccdc43	EKQRKAALLAQYADVTDEEDEADKKDDAGAS	LAQYADVtDEEDEAD
	-0.547742	S	2		___2	b-Adrenergic Receptor kinase substrate motif;Casein kinase II substrate motif	+	HTP							0.99975	3.88444e-30	145.25	142.23	145.25	0.0081756	7.65612	26052000	19250000	426	NaN	7.65612	Q9DBX5;P47713	426;434	Q9DBX5	Q9DBX5	Cytosolic phospholipase A2;Phospholipase A2;Lysophospholipase	Pla2g4a	EELENITAKHIVSNDSSDSDDEAQGPKGTEN	KHIVsNDssDsDDEA
	-0.546098	S	2		___1	BARD1 BRCT domain binding motif;Casein kinase II substrate motif	+	CST;HTP;LTP							1	5.67316e-173	282.93	282.93	239.87	0.2785	10.6367	19071000000	24253000000	1943	NaN	10.6367	Q8VDD5	1943	Q8VDD5	Q8VDD5	Myosin-9	Myh9	FVVTRRIVRKGTGDCSDEEVDGKADGADAKA	RKGtGDCsDEEVDGK
	-0.545529	S	3		___1	ERK1,2 kinase substrate motif;GSK-3, ERK1, ERK2, CDK5 substrate motif;WW domain binding motif	+	HTP							1	1.61985e-09	99.392	92.79	90.422	0.31877	8.43214	125140000	145340000	244	NaN	8.43214	P53564-4;H3BKF6;P53564-3;H3BK24;P53564;H3BJQ9	244;301;438;438;427;429	P53564-4	P53564-4	Homeobox protein cut-like 1	Cux1	GRDQPESRRPGPLPASPPPQLPRNTGEQVSN	RPGPLPAsPPPQLPR
	-0.544708	S	3		___1	AMP-activated protein kinase substrate motif;ATM kinase substrate motif;Casein kinase II substrate motif;DNA dependent Protein kinase substrate motif;PKA kinase substrate motif;PKC kinase substrate motif	+	HTP							1	1.4476e-28	143.14	133.19	102.45	-0.20525	8.51925	152970000	177580000	91	NaN	8.51925	G3X9D9;P48997	91;91	G3X9D9	G3X9D9	Involucrin	Ivl	QQQPGPQKQQLQVKKSQQELQEQELHLEKQQ	QQLQVKKsQQELQEQ
	-0.542332	S	2		___1	Casein kinase II substrate motif;ERK1,2 kinase substrate motif;G protein-coupled receptor kinase 1 substrate motif;GSK3 kinase substrate motif;GSK-3, ERK1, ERK2, CDK5 substrate motif;WW domain binding motif	+	HTP							0.999982	1.3209e-59	171	158.99	163.39	-0.013182	9.39632	1066800000	1424000000	415	NaN	9.39632	S4R2J8;S4R1B8;D3Z6Q9;S4R270	415;420;430;447	S4R2J8	S4R2J8	Bridging integrator 2	Bin2	PPPRASGSGSCNAPGSPEGSSQLCSPRASPD	GsCNAPGsPEGssQL
	-0.54229	S	3		___1	14-3-3 domain binding motif;Calmodulin-dependent protein kinase II alpha substrate motif;Calmodulin-dependent protein kinase II substrate motif;Calmodulin-dependent protein kinase IV substrate motif;G protein-coupled receptor kinase 1 substrate motif;Phosphorylase kinase substrate motif;PKA kinase substrate motif;PKC kinase substrate motif									0.988245	1.56873e-05	76.21	69.078	71.651	0.67498	8.36901	97112000	136780000	775	NaN	8.36901	Q80YV3;F7CGG2;E9QLK7;E9PZA7;E9PWT1	775;1797;2057;2057;2075	Q80YV3	Q80YV3	Transformation/transcription domain-associated protein	Trrap	RAATGAISAVFGRSQSLPGADSLLAKPIDKQ
	-0.541954	S	3		___1	b-Adrenergic Receptor kinase substrate motif;Cdc2 kinase substrate motif;CDK kinase substrate motif;CDK1,2,4,6 kinase substrate motif;ERK1,2 kinase substrate motif;G protein-coupled receptor kinase 1 substrate motif;GSK3 kinase substrate motif;GSK-3, ERK1, ERK2, CDK5 substrate motif;MAPKAPK2 kinase substrate motif;WW domain binding motif	+	HTP							0.999982	2.85937e-12	146.5	146.5	79.889	-0.10515	8.34272	106000000	114150000	60	NaN	8.34272	O55003	60	O55003	O55003	BCL2/adenovirus E1B 19 kDa protein-interacting protein 3	Bnip3	QHESGRSSSKSSHCDSPPRSQTPQDTNRAEI	sKssHCDsPPRsQtP
	-0.541555	S	3		___1	14-3-3 domain binding motif;Calmodulin-dependent protein kinase II substrate motif;Pim1 kinase substrate sequence;PKA kinase substrate motif;PKC epsilon kinase substrate motif;PKC kinase substrate motif	+	HTP							1	2.96349e-11	110.64	110.64	110.64	-0.1063	8.43748	123030000	150800000	93	NaN	8.43748	Q3UH06-2;Q3UH06;Q3UH06-3;Q3UH06-4	93;175;175;175	Q3UH06-2	Q3UH06-2	Ras-responsive element-binding protein 1	Rreb1	PSPLKRRRLSSKRKLSHDAESEDPGPAKKMV	LSSKRKLsHDAESED
	-0.539121	S	2		___1	14-3-3 domain binding motif;Calmodulin-dependent protein kinase II substrate motif;Calmodulin-dependent protein kinase IV substrate motif;Casein kinase II substrate motif;Chk1 kinase substrate motif;PKA kinase substrate motif;PKC kinase substrate motif;ZIP kinase substrate motif	+	CST;HTP							0.938756	0.00123432	68.277	50.262	68.277	-0.087824	7.51259	14076000	18477000	30	NaN	7.51259	Q8CBE3;H3BJZ0;H3BJH4;H3BK66;Q05BF4;H3BJR7	30;30;30;29;30;30	Q8CBE3	Q8CBE3	WD repeat-containing protein 37	Wdr37	KQKRKSHSLSIRRTNSSEQERTGLPREMLEG	LsIRRtNssEQERTG
	-0.537906	S	2		___1	DNA dependent Protein kinase substrate motif;ERK1,2 kinase substrate motif;G protein-coupled receptor kinase 1 substrate motif;GSK3 kinase substrate motif;GSK-3, ERK1, ERK2, CDK5 substrate motif;PKA kinase substrate motif;PKC kinase substrate motif;WW domain binding motif	+	CST;HTP							0.998156	7.99583e-14	117.6	109.92	112.57	0.68619	9.38918	1106400000	1343700000	178	NaN	9.38918	Q8CBW3-5;B7ZCU2;B7ZCU5;Q8CBW3-2;B7ZCU4;B7ZCU3;Q8CBW3-4;Q8CBW3-3;B7ZCU0;Q8CBW3;J3QNK8	178;183;183;178;183;183;178;178;183;183;183	Q8CBW3-5	Q8CBW3-5	Abl interactor 1	Abi1	TGTLSRTNPPTQKPPSPPVSGRGTLGRNTPY	PPtQKPPsPPVsGRG
	-0.537131	S	3		___1	PKA kinase substrate motif;PKC kinase substrate motif	+	CST;HTP							0.805259	2.63869e-24	137.72	137.72	41.475	0.82301	9.60307	1721800000	2287500000	504	NaN	9.60307	P28867;P28867-2;Q1MX43;Q1MX42;Q1MX41;Q1MX40	504;530;389;415;389;415	P28867	P28867	Protein kinase C delta type;Protein kinase C delta type regulatory subunit;Protein kinase C delta type catalytic subunit	Prkcd	DFGMCKENIFGEGRASTFCGTPDYIAPEILQ	IFGEGRAstFCGtPD
	-0.537047	S	3		___1	Casein kinase II substrate motif;ERK1,2 kinase substrate motif;GSK-3, ERK1, ERK2, CDK5 substrate motif;WW domain binding motif	+	HTP							0.999961	6.83039e-06	48.286	45.595	48.286	1.0652	8.1954	62277000	94542000	12	NaN	8.1954	Q9WVH4;H9KUZ0	12;12	Q9WVH4	Q9WVH4	Forkhead box protein O3	Foxo3	____MAEAPASPVPLSPLEVELDPEFEPQSR	PAsPVPLsPLEVELD
	-0.536064	S	3		___2	BARD1 BRCT domain binding motif;Casein kinase II substrate motif;G protein-coupled receptor kinase 1 substrate motif	+	CST;HTP							1	1.04263e-121	232.02	228.61	129.22	0.20664	9.6665	1559700000	3080000000	371	NaN	9.6665	P15702	371	P15702	P15702	Leukosialin	Spn	GSGPNLKGEEEPLVGSEDEAVETPTSDGPQA	EEEPLVGsEDEAVEt
	-0.536064	T	3		___2	b-Adrenergic Receptor kinase substrate motif;Casein kinase II substrate motif;GSK-3, ERK1, ERK2, CDK5 substrate motif;WW domain binding motif	+	HTP							0.946046	4.40912e-22	112.64	112.64	112.64	-0.094687	8.65724	206950000	247240000	378	NaN	8.65724	P15702	378	P15702	P15702	Leukosialin	Spn	GEEEPLVGSEDEAVETPTSDGPQAKDEAAPQ	sEDEAVEtPTSDGPQ
	-0.534663	S	2		___1	Cdc2 kinase substrate motif;CDK kinase substrate motif;CDK1,2,4,6 kinase substrate motif;ERK1,2 kinase substrate motif;G protein-coupled receptor kinase 1 substrate motif;Growth associated histone HI kinase substrate motif;GSK3 kinase substrate motif;GSK-3, ERK1, ERK2, CDK5 substrate motif;MAPKAPK2 kinase substrate motif;MDC1 BRCT domain binding motif;Plk1 PBD domain binding motif;WW domain bindi…	+	HTP							0.936264	0.00409567	75.483	31.058	75.483	0.015328	7.18401	6379500	8896200	416	NaN	7.18401	Q58FA4	416	Q58FA4	Q58FA4	Transcription factor E2F8	E2f8	KSIENDRRKISSAPSSPVKSNKAESSQNSPP	KIssAPssPVKSNKA
	-0.533931	S	2		___1	Casein kinase II substrate motif;ERK1,2 kinase substrate motif;G protein-coupled receptor kinase 1 substrate motif;Growth associated histone HI kinase substrate motif;GSK-3, ERK1, ERK2, CDK5 substrate motif;WW domain binding motif	+	CST;HTP							0.999604	0.00240325	78.342	65.305	78.342	1.5097	7.82581	29306000	37653000	206	NaN	7.82581	Q91Z67	206	Q91Z67	Q91Z67	SLIT-ROBO Rho GTPase-activating protein 2	Srgap2	QIGKSVKQEDRQTPRSPDSTANVRIEEKHVR	EDRQtPRsPDsTANV
	-0.533827	T	3		___1	Calmodulin-dependent protein kinase II substrate motif;Casein kinase II substrate motif;G protein-coupled receptor kinase 1 substrate motif;GSK-3, ERK1, ERK2, CDK5 substrate motif;PKC kinase substrate motif;RAF1 kinase substrate motif;WW domain binding motif	+	CST;HTP							0.999804	9.08005e-97	207.33	207.33	169.35	0.039505	8.94783	360680000	526130000	233	NaN	8.94783	Q8K124	233	Q8K124	Q8K124	Pleckstrin homology domain-containing family O member 2	Plekho2	AVEDSKETPAGERALTPDSASSGANPESQED	PAGERALtPDsAssG
	-0.533785	S	2		___1	Casein kinase II substrate motif;Cdc2 kinase substrate motif;CDK kinase substrate motif;CDK1,2,4,6 kinase substrate motif;ERK1,2 kinase substrate motif;G protein-coupled receptor kinase 1 substrate motif;GSK3 kinase substrate motif;GSK-3, ERK1, ERK2, CDK5 substrate motif;WW domain binding motif	+	HTP							0.805515	0.00031578	93.237	57.696	82.529	2.244	7.95668	44465000	46041000	634	NaN	7.95668	Q3UMR0-2;Q3UMR0	634;634	Q3UMR0-2	Q3UMR0-2	Ankyrin repeat domain-containing protein 27	Ankrd27	LSSDRRPRPSEVPAQSPTRSVDSISQGSSTS	PsEVPAQsPTRSVDS
	-0.532595	S	3		___1	14-3-3 domain binding motif;b-Adrenergic Receptor kinase substrate motif;Calmodulin-dependent protein kinase II substrate motif;Casein kinase II substrate motif;PAK2 kinase substrate motif;PKA kinase substrate motif;PKC epsilon kinase substrate motif;PKC kinase substrate motif	+	CST;HTP							0.982471	1.71483e-69	194.89	182.07	194.89	1.1267	8.92406	352260000	487310000	66	NaN	8.92406	Q8BH50-2;Q8BH50;Q0VAW6	66;66;66	Q8BH50-2	Q8BH50-2	Uncharacterized protein C18orf25 homolog	8030462N17Rik	VLSSMPCLLMELRRDSSESQLASTESDKPTT	LMELRRDssEsQLAs
	-0.527699	S	3		___1	14-3-3 domain binding motif;Akt kinase substrate motif;Calmodulin-dependent protein kinase II substrate motif;Casein kinase II substrate motif;ERK1,2 kinase substrate motif;G protein-coupled receptor kinase 1 substrate motif;GSK-3, ERK1, ERK2, CDK5 substrate motif;MAPKAPK1 kinase substrate motif;Pim1 kinase substrate sequence;PKA kinase substrate motif;PKC epsilon kinase substrate motif;PKC kinas…	+	CST;HTP							0.99996	8.19728e-05	68.134	53.113	56.304	-0.18041	8.29671	86778000	111240000	526	NaN	8.29671	Q8K3X4	526	Q8K3X4	Q8K3X4	Interferon regulatory factor 2-binding protein-like	Irf2bpl	PTGRGAASSLRKRKASPEPPDSAESALKLGE	SLRKRKAsPEPPDsA
	-0.527055	S	2		___1	b-Adrenergic Receptor kinase substrate motif;Casein kinase II substrate motif;ERK1,2 kinase substrate motif;GSK-3, ERK1, ERK2, CDK5 substrate motif;WW domain binding motif	+	HTP							0.999998	1.82238e-17	137.79	137.79	133.79	0.86312	8.68602	211690000	273620000	221	NaN	8.68602	Q8CB87	221	Q8CB87	Q8CB87	Ras-related protein Rab-44	Rab44	KGQDEQDVSSKQPVDSPDSDARPKGSFLWSL	SSKQPVDsPDSDARP
	-0.52423	S	2		___1	ERK1,2 kinase substrate motif;G protein-coupled receptor kinase 1 substrate motif;GSK3 kinase substrate motif;GSK-3, ERK1, ERK2, CDK5 substrate motif;MDC1 BRCT domain binding motif;PKA kinase substrate motif;PKC kinase substrate motif;Plk1 PBD domain binding motif;WW domain binding motif	+	HTP							0.996111	0.000740877	75.739	60.84	65.03	-0.28581	8.10924	74047000	54552000	203	NaN	8.10924	E0CXY0;F6TLV3;Q8BX90	203;159;203	E0CXY0	E0CXY0	Fibronectin type-III domain-containing protein 3A	Fndc3a	KKLKDRQGTQKDKMSSPPPSPQKCPSPISEH	TQKDKMssPPPsPQK
	-0.523649	S	3		___2	Casein kinase II substrate motif;Cdc2 kinase substrate motif;CDK kinase substrate motif;CDK1,2,4,6 kinase substrate motif;ERK1,2 kinase substrate motif;G protein-coupled receptor kinase 1 substrate motif;GSK3 kinase substrate motif;GSK-3, ERK1, ERK2, CDK5 substrate motif;MAPKAPK2 kinase substrate motif;WW domain binding motif	+	CST;HTP							0.962373	1.68034e-09	96.7	92.219	89.979	-0.52421	8.2639	64859000	118750000	267	NaN	8.2639	F8WI22;Q8K019-2;Q8K019;Q8K019-3	267;265;267;265	F8WI22	F8WI22	Bcl-2-associated transcription factor 1	Bclaf1	SAKNTPSQHSHSIQHSPERSGSGSVGNGSSR	HSHsIQHsPERSGsG
	-0.523649	T	3		___2	GSK-3, ERK1, ERK2, CDK5 substrate motif;MAPKAPK2 kinase substrate motif;PKA kinase substrate motif;PKC kinase substrate motif;WW domain binding motif	+	HTP							0.995984	1.68034e-09	96.7	92.219	89.979	-0.52421	8.2639	64859000	118750000	256	NaN	8.2639	F8WI22;Q8K019-2;Q8K019;Q8K019-3	256;254;256;254	F8WI22	F8WI22	Bcl-2-associated transcription factor 1	Bclaf1	CSDAPMLSTVHSAKNTPSQHSHSIQHSPERS	TVHSAKNtPsQHSHs
	-0.521743	S	2		___1	14-3-3 domain binding motif;Calmodulin-dependent protein kinase II substrate motif;ERK1,2 kinase substrate motif;GSK-3, ERK1, ERK2, CDK5 substrate motif;PKA kinase substrate motif;PKC kinase substrate motif;WW domain binding motif	+	HTP							0.999242	0.0543643	58.246	38.105	58.246	0.29291	7.5552	16063000	19846000	556	NaN	7.5552	Q8VDG3	556	Q8VDG3	Q8VDG3	Poly(A)-specific ribonuclease PARN	Parn	SNSFTAAGVLGKRTLSPDPREAALEDRESEE	VLGKRtLsPDPREAA
	-0.521556	S	3		___1	Casein kinase II substrate motif;ERK1,2 kinase substrate motif;GSK-3, ERK1, ERK2, CDK5 substrate motif;WW domain binding motif	+	HTP							0.927199	2.26564e-35	142.25	123.71	126.27	0.14824	7.89368	33490000	44796000	462	NaN	7.89368	O88746;Q3UDC3;O88746-2	462;486;138	O88746	O88746	Target of Myb protein 1	Tom1	LEERAKAADRLPNLASPSAEGPPRPSPGTAP	DRLPNLAsPsAEGPP
	-0.520521	S	3		___1	14-3-3 domain binding motif;Akt kinase substrate motif;Calmodulin-dependent protein kinase II substrate motif;DNA dependent Protein kinase substrate motif;MAPKAPK1 kinase substrate motif;p70 Ribosomal S6 kinase substrate motif;Phosphorylase kinase substrate motif;PKA kinase substrate motif;PKC kinase substrate motif;PP2B substrate motif;ZIP kinase substrate motif	+	CST;HTP;LTP	+		cytoskeletal reorganization				1	2.67336e-40	162.11	129.87	141.31	-0.0093922	9.28571	840850000	1089800000	2144	NaN	9.28571	B7FAU9;Q8BTM8;B7FAV1	2144;2152;2088	B7FAU9	B7FAU9	Filamin-A	Flna	EGRVKESITRRRRAPSVANIGSHCDLSLKIP	TRRRRAPsVANIGsH	p90RSK
	-0.5205	S	3		___1	ERK1,2 kinase substrate motif;GSK-3, ERK1, ERK2, CDK5 substrate motif;WW domain binding motif	+	HTP							0.999202	1.47342e-13	70.003	65.1	68.763	0.43961	8.59993	151150000	246900000	1516	NaN	8.59993	Q61191;F6SJS2	1516;82	Q61191	Q61191	Host cell factor 1;HCF N-terminal chain 1;HCF N-terminal chain 2;HCF N-terminal chain 3;HCF N-terminal chain 4;HCF N-terminal chain 5;HCF N-terminal chain 6;HCF C-terminal chain 1;HCF C-terminal chain 2;HCF C-terminal chain 3;HCF C-terminal chain 4;HCF C-terminal chain 5;HCF C-terminal chain 6	Hcfc1	PVPGPSVPPPEELQVSPGPRQQLPPRQLLQS	PPEELQVsPGPRQQL
	-0.519983	S	2		___1	14-3-3 domain binding motif;Akt kinase substrate motif;Calmodulin-dependent protein kinase II substrate motif;Casein kinase II substrate motif;G protein-coupled receptor kinase 1 substrate motif;GSK3 kinase substrate motif;MAPKAPK1 kinase substrate motif;MAPKAPK2 kinase substrate motif;MDC1 BRCT domain binding motif;p70 Ribosomal S6 kinase substrate motif;Phosphorylase kinase substrate motif;PKA …	+	CST;HTP							0.948694	1.87673e-21	135.91	135.91	135.91	0.80991	8.28932	107210000	87474000	4246	NaN	8.28932	Q9QXS1-16;Q9QXS1-15;Q9QXS1-10;Q9QXS1-9;Q9QXS1-12;Q9QXS1-11;Q9QXS1-13;Q9QXS1-5;Q9QXS1-3;Q9QXS1-4;Q9QXS1-14;Q9QXS1-6;Q9QXS1-7;Q9QXS1-8;Q9QXS1-2;Q9QXS1;E9Q3W4	4246;4151;4213;4218;4223;4228;4236;4245;4245;4250;4252;4274;4279;4291;4388;4393;4088	Q9QXS1-16	Q9QXS1-16	Plectin	Plec	DMLSGNAGGFRSRSSSVGSSSSYPISSAGPR	GFRsRsssVGssssy
	-0.51959	S	3		___1	14-3-3 domain binding motif;Calmodulin-dependent protein kinase II substrate motif;Calmodulin-dependent protein kinase IV substrate motif;Casein kinase II substrate motif;Chk1 kinase substrate motif;ERK1,2 kinase substrate motif;GSK-3, ERK1, ERK2, CDK5 substrate motif;MAPKAPK2 kinase substrate motif;MDC1 BRCT domain binding motif;PKA kinase substrate motif;PKC kinase substrate motif;Plk1 PBD doma…	+	HTP							0.805405	0.000188243	67.252	67.252	67.252	-0.22361	7.76292	21204000	36728000	1189	NaN	7.76292	O08648-2;O08648	1189;1241	O08648-2	O08648-2	Mitogen-activated protein kinase kinase kinase 4	Map3k4	SIAAELQFRSLSRHSSPTEERDEPAYPRSDS	RSLSRHSsPtEERDE
	-0.517627	S	3		___2	Casein kinase I substrate motif;Casein kinase II substrate motif;ERK1,2 kinase substrate motif;G protein-coupled receptor kinase 1 substrate motif;GSK-3, ERK1, ERK2, CDK5 substrate motif;PKA kinase substrate motif;WW domain binding motif	+	HTP							0.958975	0.00150806	41.086	38.461	41.086	-0.94004	6.85704	2301400	4893700	1577	NaN	6.85704	Q3UH06-2;Q3UH06;Q3UH06-3;F6UB40	1577;1659;1713;279	Q3UH06-2	Q3UH06-2	Ras-responsive element-binding protein 1	Rreb1	AAEQAAEPSAPKEQASPGETDPQSPAAIVQD	SAPKEQAsPGETDPQ
	-0.517627	S	3		___2	Casein kinase I substrate motif;ERK1,2 kinase substrate motif;GSK-3, ERK1, ERK2, CDK5 substrate motif;WW domain binding motif	+	HTP							0.985189	4.35725e-13	71.098	70.104	71.098	1.2348	7.76949	22594000	36222000	1585	NaN	7.76949	Q3UH06-2;Q3UH06;Q3UH06-3;F6UB40	1585;1667;1721;287	Q3UH06-2	Q3UH06-2	Ras-responsive element-binding protein 1	Rreb1	SAPKEQASPGETDPQSPAAIVQDLLELCGKR	PGETDPQsPAAIVQD
	-0.517565	S	3		___1	ERK1,2 kinase substrate motif;Growth associated histone HI kinase substrate motif;GSK-3, ERK1, ERK2, CDK5 substrate motif;MAPKAPK2 kinase substrate motif;PKA kinase substrate motif;PKC kinase substrate motif;WW domain binding motif	+	HTP							1	2.28389e-06	88.311	79.969	58.461	-0.8016	7.85996	28450000	43987000	314	NaN	7.85996	O54786	314	O54786	O54786	DNA fragmentation factor subunit alpha	Dffa	QVQSLHSLRNLSARRSPLPGEPQRPKRAKRD	RNLSARRsPLPGEPQ
	-0.514511	S	2		___1	ERK1, ERK2, SAPK, CDK5 and GSK3 kinase substrate motif;ERK1,2 kinase substrate motif;G protein-coupled receptor kinase 1 substrate motif;Growth associated histone HI kinase substrate motif;GSK-3, ERK1, ERK2, CDK5 substrate motif;WW domain binding motif	+	CST;HTP							0.999998	1.51786e-60	205.95	195.29	197.15	1.1075	8.76515	274090000	308230000	320	NaN	8.76515	Q569Z6;Q8BZN7	320;320	Q569Z6	Q569Z6	Thyroid hormone receptor-associated protein 3	Thrap3	GSGSLSPSKKSPVGKSPPATGSAYGSSQKEE	KKsPVGKsPPAtGsA
	-0.513028	S	2		___1	Casein kinase II substrate motif;ERK1,2 kinase substrate motif;GSK-3, ERK1, ERK2, CDK5 substrate motif;PKA kinase substrate motif;PKC kinase substrate motif;WW domain binding motif	+	HTP							1	4.06103e-05	103.13	96.657	103.13	-0.17994	8.11949	56184000	75488000	88	NaN	8.11949	E9PY05;I1E4Y2;D3YU51;P81270-3;P81270-2;P81270-4;P81270	88;81;81;88;88;81;88	E9PY05	E9PY05	Transcriptional regulator ERG	Erg	IKMECNPSQVNGSRNSPDECSVNKGGKMVGS	QVNGsRNsPDECSVN
	-0.511608	S	2		___3	14-3-3 domain binding motif;Akt kinase substrate motif;Calmodulin-dependent protein kinase II substrate motif;G protein-coupled receptor kinase 1 substrate motif;GSK3 kinase substrate motif;MAPKAPK1 kinase substrate motif;MAPKAPK2 kinase substrate motif;p70 Ribosomal S6 kinase substrate motif;Phosphorylase kinase substrate motif;PKA kinase substrate motif;PKC kinase substrate motif	+	CST;HTP							1	0.000457991	85.622	85.622	49.537	0.5708	9.13628	462750000	905830000	183	NaN	9.13628	Q8BL97-4;Q8BL97-2;Q8BL97	183;183;212	Q8BL97-4	Q8BL97-4	Serine/arginine-rich splicing factor 7	Srsf7	LRRSRSASLRRSRSGSIIGSRYFQSRSRSRS	LRRsRsGsIIGsRYF
	-0.510313	S	4		___1	BARD1 BRCT domain binding motif;Casein kinase II substrate motif;G protein-coupled receptor kinase 1 substrate motif									0.908197	2.35482e-14	75.662	70.251	75.662	-1.2516	7.79069	23200000	38557000	321	NaN	7.79069	Q9Z2E9	321	Q9Z2E9	Q9Z2E9	Seipin	Bscl2	DGESPEDPSGTEGQLSEEEKPEKRPLNGEEE
	-0.509779	S	3		___1	ERK1,2 kinase substrate motif;G protein-coupled receptor kinase 1 substrate motif;GSK3 kinase substrate motif;GSK-3, ERK1, ERK2, CDK5 substrate motif;WW domain binding motif	+	HTP							0.999999	1.2505e-14	103.58	103.58	91.767	0.12622	8.54584	165570000	185860000	143	NaN	8.54584	Q8CB87	143	Q8CB87	Q8CB87	Ras-related protein Rab-44	Rab44	SSIEAHSHRTLRLCWSPPPSPSSTSAPQTPR	RTLRLCWsPPPSPSS
	-0.508157	T	3		___1	b-Adrenergic Receptor kinase substrate motif;Calmodulin-dependent protein kinase II substrate motif;Casein kinase II substrate motif;Chk1 kinase substrate motif;MAPKAPK2 kinase substrate motif;PKA kinase substrate motif;PKC kinase substrate motif	+	CST;HTP							0.999999	1.10291e-23	150.91	140.64	150.91	0.34759	7.76701	27015000	31466000	122	NaN	7.76701	Q99JF8;A2BI12;Q99JF8-2	122;122;122	Q99JF8	Q99JF8	PC4 and SFRS1-interacting protein	Psip1	DVEVEEKETNVSKEDTDQEEKASNEDVTKAV	tNVsKEDtDQEEKAs
	-0.506865	S	2		___1	Casein kinase II substrate motif;ERK1,2 kinase substrate motif;G protein-coupled receptor kinase 1 substrate motif;GSK3 kinase substrate motif;GSK-3, ERK1, ERK2, CDK5 substrate motif;MAPKAPK2 kinase substrate motif;PKA kinase substrate motif;PKC kinase substrate motif;WW domain binding motif	+	CST;HTP							0.852885	4.01099e-08	97.291	86.813	75.316	0.21822	9.17892	673530000	836290000	343	NaN	9.17892	P49586	343	P49586	P49586	Choline-phosphate cytidylyltransferase A	Pcyt1a	RSPSPSFRWPFSGKTSPSSSPASLSRCRAVT	WPFsGktsPsssPAs
	-0.505738	S	3		___1	14-3-3 domain binding motif;Akt kinase substrate motif;b-Adrenergic Receptor kinase substrate motif;Calmodulin-dependent protein kinase II substrate motif;Casein kinase II substrate motif;G protein-coupled receptor kinase 1 substrate motif;MAPKAPK1 kinase substrate motif;PKA kinase substrate motif;PKC kinase substrate motif;ZIP kinase substrate motif	+	CST;HTP							1	6.09718e-06	103.46	97.427	103.46	-0.37082	7.88146	33329000	42784000	496	NaN	7.88146	Q9D824-3;Q9D824-2;Q9D824;D3Z4V2;D3Z619;D3Z3F1	496;505;541;555;490;549	Q9D824-3	Q9D824-3	Pre-mRNA 3'-end-processing factor FIP1	Fip1l1	TRHKSSRSNSRRRHESEEGDSHRRHKHKKSK	NsRRRHEsEEGDsHR
	-0.505144	S	2		___1	Casein kinase I substrate motif;DNA dependent Protein kinase substrate motif;ERK1,2 kinase substrate motif;GSK-3, ERK1, ERK2, CDK5 substrate motif;WW domain binding motif	+	HTP							0.999985	3.64942e-05	63.979	58.684	63.979	0.81183	8.8785	314320000	441640000	347	NaN	8.8785	Q6PDG5-2;Q3UID0;Q6PDG5	347;347;347	Q6PDG5-2	Q6PDG5-2	SWI/SNF complex subunit SMARCC2	Smarcc2	REEEQEDLTKDMDEPSPVPNVEEVTLPKTVN	TKDMDEPsPVPNVEE
	-0.505001	T	2		___1	Casein kinase II substrate motif;G protein-coupled receptor kinase 1 substrate motif;GSK-3, ERK1, ERK2, CDK5 substrate motif;RAF1 kinase substrate motif;WW domain binding motif	+	CST;HTP							0.999936	8.47404e-16	146.1	129.77	141.06	0.5998	9.00937	435390000	586400000	537	NaN	9.00937	Q3UHJ0-2;Q3UHJ0	537;618	Q3UHJ0-2	Q3UHJ0-2	AP2-associated protein kinase 1	Aak1	TTPPPTIQGQKVGSLTPPSSPKTQRAGHRRI	GQKVGsLtPPssPKt
	-0.504366	S	4		___1	ERK1,2 kinase substrate motif;G protein-coupled receptor kinase 1 substrate motif;GSK3 kinase substrate motif;GSK-3, ERK1, ERK2, CDK5 substrate motif;WW domain binding motif									0.99854	2.22728e-28	114.62	112.12	114.62	1.013	8.24504	62287000	113520000	429	NaN	8.24504	A2AU91;A2AU89;A2AU90	429;429;429	A2AU91	A2AU91		Trp53bp1	AMETEKPLLPSQPAVSPQASTPVSRSTPVFT
	-0.503937	S	3		___1	14-3-3 domain binding motif;Calmodulin-dependent protein kinase II substrate motif;Casein kinase II substrate motif;ERK1,2 kinase substrate motif;G protein-coupled receptor kinase 1 substrate motif;GSK-3, ERK1, ERK2, CDK5 substrate motif;PKA kinase substrate motif;PKC kinase substrate motif;WW domain binding motif	+	CST;HTP							0.975303	7.69113e-26	136.71	131.18	109.59	0.92038	8.95219	340230000	555510000	234	NaN	8.95219	Q8BR65	234	Q8BR65	Q8BR65	Sin3 histone deacetylase corepressor complex component SDS3	Suds3	DLRTLNKLKSPKRPASPSSPEHLPATPAESP	KsPKRPAsPssPEHL
	-0.503527	S	3		___2	BARD1 BRCT domain binding motif;Casein kinase II substrate motif;G protein-coupled receptor kinase 1 substrate motif;MDC1 BRCT domain binding motif;Plk1 PBD domain binding motif	+	HTP							0.999744	3.77924e-22	135.3	128.2	122.39	0.028761	8.67612	196870000	277500000	483	NaN	8.67612	Q5U3K5	483	Q5U3K5	Q5U3K5	Rab-like protein 6	Rabl6	LLPSDPMPSKNISLSSEEEAEGLAGHPRVAP	sKNIsLssEEEAEGL
	-0.502505	S	2		___1	BARD1 BRCT domain binding motif;Casein kinase I substrate motif;Casein kinase II substrate motif;G protein-coupled receptor kinase 1 substrate motif;PKA kinase substrate motif;PKC kinase substrate motif	+	HTP							1	4.3186e-34	166.48	155.71	140.27	0.42277	8.89435	259070000	524980000	864	NaN	8.89435	Q8CI75;Q8CI75-2	864;878	Q8CI75	Q8CI75	DIS3-like exonuclease 2	Dis3l2	LKYSAILKRPGLEKASDEEPED_________	RPGLEKAsDEEPED_
	-0.502219	S	3		___1	14-3-3 domain binding motif;Calmodulin-dependent protein kinase II substrate motif;Casein kinase II substrate motif;MAPKAPK2 kinase substrate motif;Phosphorylase kinase substrate motif;PKA kinase substrate motif;PKC kinase substrate motif									0.982463	0.00017016	71.202	60.414	71.202	1.4039	8.63012	209820000	216880000	30	NaN	8.63012	Q7TMF2	30	Q7TMF2	Q7TMF2	3'-5' exoribonuclease 1	Eri1	QQKTPRPECEESRPLSVEKKQRCRLDGKETD
	-0.501239	T	2		___1	Calmodulin-dependent protein kinase II substrate motif;G protein-coupled receptor kinase 1 substrate motif;p70 Ribosomal S6 kinase substrate motif;PKC kinase substrate motif	+	CST;HTP;LTP	+	protein stabilization; protein conformation; phosphorylation; enzymatic activity, induced					0.999528	9.81799e-52	169.9	169.9	169.9	0.6855	9.23256	739660000	968620000	191	NaN	9.23256	P05132-2;P05132;P68181-2;P68181-3;P68181;P68181-4	191;198;186;187;198;246	P05132-2;P68181-2	P05132-2	cAMP-dependent protein kinase catalytic subunit alpha;cAMP-dependent protein kinase catalytic subunit beta	Prkaca;Prkacb	VTDFGFAKRVKGRTWTLCGTPEYLAPEIILS	RVKGRtWtLCGtPEY	PDK1;PKACA
	-0.498729	S	2		___1	b-Adrenergic Receptor kinase substrate motif;ERK1,2 kinase substrate motif;GSK-3, ERK1, ERK2, CDK5 substrate motif;WW domain binding motif	+	HTP							0.99943	0.000859095	89.232	80.832	89.232	-0.30077	8.52693	186310000	150150000	82	NaN	8.52693	Q8C0J6	82	Q8C0J6	Q8C0J6	Ankyrin repeat domain-containing protein SOWAHC	Sowahc	GTKYVHLKKRFCTGDSPPLEAKLPREPPRIE	KRFCTGDsPPLEAKL
	-0.497486	S	2		___1	b-Adrenergic Receptor kinase substrate motif;Casein kinase II substrate motif;Pyruvate dehydrogenase kinase substrate motif	+	CST;HTP							1	1.78814e-30	135.34	126.23	43.306	0.045987	8.10755	26243000	101860000	307	NaN	8.10755	P14869;E9Q070	307;307	P14869	P14869	60S acidic ribosomal protein P0	Rplp0;Gm8730	AAAPAKAEAKEESEESDEDMGFGLFD_____	AKEEsEEsDEDMGFG
	-0.497303	T	2		___1	Calmodulin-dependent protein kinase II substrate motif;Casein kinase II substrate motif;G protein-coupled receptor kinase 1 substrate motif;GSK-3, ERK1, ERK2, CDK5 substrate motif;PKC kinase substrate motif;WW domain binding motif	+	HTP							0.999821	1.26997e-05	116.55	105.62	97.734	-0.58932	8.39848	111450000	138860000	66	NaN	8.39848	O55003	66	O55003	O55003	BCL2/adenovirus E1B 19 kDa protein-interacting protein 3	Bnip3	SSSKSSHCDSPPRSQTPQDTNRAEIDSHSFG	DsPPRsQtPQDtNRA
	-0.49659	S	2		___1	14-3-3 domain binding motif;ATM kinase substrate motif;Calmodulin-dependent protein kinase II substrate motif;Casein kinase II substrate motif;DNA dependent Protein kinase substrate motif;PKA kinase substrate motif;PKC epsilon kinase substrate motif;PKC kinase substrate motif	+	HTP							1	1.60526e-47	179.09	163.3	124.63	-0.476	8.62656	178770000	244430000	509	NaN	8.62656	G3UXW9;Q99LD4;Q3MIA8	509;454;470	G3UXW9	G3UXW9	COP9 signalosome complex subunit 1	Gps1	VLRNQIHVKSPPREGSQGELTPANSQSRMST	ksPPREGsQGELtPA
	-0.496407	S	2		___2	Casein kinase II substrate motif	+	HTP							0.982407	0.00484589	48.711	35.703	48.711	1.9842	7.68957	32640000	16289000	678	NaN	7.68957	Q9JJY4	678	Q9JJY4	Q9JJY4	Probable ATP-dependent RNA helicase DDX20	Ddx20	RTSSQSKGNKSYLEGSSDTQLKDTECTPVGG	NKsYLEGssDtQLKD
	-0.495552	S	2		___1	14-3-3 domain binding motif;Calmodulin-dependent protein kinase II substrate motif;ERK1,2 kinase substrate motif;GSK-3, ERK1, ERK2, CDK5 substrate motif;PKA kinase substrate motif;PKC kinase substrate motif;WW domain binding motif	+	HTP							0.998101	0.0263877	67.704	60.484	67.704	-0.40121	7.72552	32225000	20927000	537	NaN	7.72552	Q6PG16-3;E9Q4T0;Q6PG16-2;Q6PG16;E9QKG8	537;537;596;613;613	Q6PG16-3	Q6PG16-3	Holliday junction recognition protein	Hjurp	LNPDSPQQSSQKRSISPGCHRRVLQDSTAQT	SSQKRSIsPGCHRRV
	-0.494394	S	2		___1	14-3-3 domain binding motif;Calmodulin-dependent protein kinase II substrate motif;Casein kinase II substrate motif;G protein-coupled receptor kinase 1 substrate motif;PAK2 kinase substrate motif;PKA kinase substrate motif;PKC epsilon kinase substrate motif;PKC kinase substrate motif;Pyruvate dehydrogenase kinase substrate motif	+	HTP							1	0.0315914	70.028	70.028	70.028	0.037671	6.95236	3943700	5017500	254	NaN	6.95236	J3QNW0;P13864;P13864-2	135;254;136	J3QNW0;P13864	P13864	Cytosine-specific methyltransferase;DNA (cytosine-5)-methyltransferase 1	Dnmt1	RSLRRHTRELSLRRKSKEDPDREARPETHLD	ELsLRRKsKEDPDRE
	-0.492748	S	3		___1	14-3-3 domain binding motif;Calmodulin-dependent protein kinase II substrate motif;ERK1,2 kinase substrate motif;G protein-coupled receptor kinase 1 substrate motif;GSK-3, ERK1, ERK2, CDK5 substrate motif;PKA kinase substrate motif;PKC kinase substrate motif;WW domain binding motif	+	HTP							0.999918	9.99624e-05	65.495	57.451	65.495	0.11524	7.54691	13828000	21402000	175	NaN	7.54691	Q9QXE2	175	Q9QXE2	Q9QXE2	DNA polymerase lambda	Poll	PRTTLSLSPPHTRAVSPPPTAEKPSRTQAQL	PPHTRAVsPPPTAEK
	-0.492281	S	2		___1	ERK1,2 kinase substrate motif;G protein-coupled receptor kinase 1 substrate motif;Growth associated histone HI kinase substrate motif;GSK-3, ERK1, ERK2, CDK5 substrate motif;PKA kinase substrate motif;PKC kinase substrate motif;WW domain binding motif	+	CST;HTP							1	0.00458574	52.247	46.466	52.247	0.35022	7.22768	6145900	10746000	36	NaN	7.22768	Q99PL6	36	Q99PL6	Q99PL6	UBX domain-containing protein 6	Ubxn6	QKLTDSAGEKTTKGKSPQLALRQPRQGPTDE	EKTTKGKsPQLALRQ
	-0.491795	S	3		___1	b-Adrenergic Receptor kinase substrate motif;BARD1 BRCT domain binding motif;Casein kinase II substrate motif;G protein-coupled receptor kinase 1 substrate motif	+	HTP							0.998859	4.47411e-15	93.807	86.1	93.807	-1.145	7.73092	13328000	40489000	585	NaN	7.73092	Q7JJ13-2;Q7JJ13;U3KLT0	585;631;239	Q7JJ13-2	Q7JJ13-2	Bromodomain-containing protein 2	Brd2	KSQKTAPPVLPTGYDSEEEEESRPMSYDEKR	VLPTGYDsEEEEESR
	-0.491125	S	2		___2	Casein kinase II substrate motif	+	HTP							0.999516	5.30941e-89	223.46	217.75	223.46	-0.20142	9.00048	405730000	595350000	2	NaN	9.00048	P62996;P62996-2	2;2	P62996	P62996	Transformer-2 protein homolog beta	Tra2b	______________MSDSGEQNYGERESRSA	______MsDsGEQNY
	-0.491125	S	2		___2	b-Adrenergic Receptor kinase substrate motif;Casein kinase I substrate motif;Casein kinase II substrate motif;G protein-coupled receptor kinase 1 substrate motif;GSK3 kinase substrate motif;PKA kinase substrate motif;PKC kinase substrate motif	+	HTP							1	5.30941e-89	223.46	217.75	149.52	-0.65515	8.94856	391930000	496370000	14	NaN	8.94856	P62996;P62996-2	14;14	P62996	P62996	Transformer-2 protein homolog beta	Tra2b	__MSDSGEQNYGERESRSASRSGSAHGSGKS	QNYGEREsRsAsRSG
	-0.490882	Y	2		___1	JAK2 kinase substrate motif;SHP1 SH2 domain binding motif									1	0.000683708	55.04	37.788	48.948	-1.0699	8.63018	182240000	244510000	510	NaN	8.63018	Q5SU71;Q61510	510;518	Q5SU71	Q5SU71	E3 ubiquitin/ISG15 ligase TRIM25	Trim25	CSQVLGLHCYKNGIHYWEVELQKNNFCGVGI
	-0.489463	S	2		___1	b-Adrenergic Receptor kinase substrate motif;Casein kinase I substrate motif;ERK1,2 kinase substrate motif;GSK-3, ERK1, ERK2, CDK5 substrate motif;MAPKAPK2 kinase substrate motif;WW domain binding motif	+	HTP							0.999994	6.273e-48	165.48	160.36	124.17	-0.29476	8.8196	294660000	365420000	15	NaN	8.8196	D3Z478;D3YYS7;Q9D0L8-2;Q9D0L8-3;Q9D0L8;D3Z4K1	15;15;15;15;15;15	D3Z478	D3Z478	mRNA cap guanine-N7 methyltransferase	Rnmt	_MEGSAKASVASDPESPPGGNEPAAASGQRL	sVAsDPEsPPGGNEP
	-0.487864	S	2		___1	Casein kinase II substrate motif;ERK1,2 kinase substrate motif;GSK-3, ERK1, ERK2, CDK5 substrate motif;WW domain binding motif	+	HTP							0.985262	0.00188753	65.495	58.327	65.495	0.34744	6.96069	3851500	5283200	1427	NaN	6.96069	F8VPZ9	1427	F8VPZ9	F8VPZ9		Gltscr1	PGAAEGAQGRPRGAGSPTPLPTKVDEATSGL	GRPRGAGsPtPLPTK
	-0.487439	S	2		___1	Casein kinase II substrate motif;Cdc2 kinase substrate motif;CDK kinase substrate motif;CDK1,2,4,6 kinase substrate motif;ERK1,2 kinase substrate motif;Growth associated histone HI kinase substrate motif;GSK-3, ERK1, ERK2, CDK5 substrate motif;MAPKAPK2 kinase substrate motif;MDC1 BRCT domain binding motif;Plk1 PBD domain binding motif;WW domain binding motif	+	HTP							0.951794	4.3171e-24	161.82	136.63	161.82	-0.22282	8.94626	384600000	499010000	71	NaN	8.94626	Q3U9G9	71	Q3U9G9	Q3U9G9	Lamin-B receptor	Lbr	PLKSFKQRKSGSISSSPSRRRGSRSRSRSRS	KsGsIsssPsRRRGS
	-0.484954	S	4		___1	b-Adrenergic Receptor kinase substrate motif;Casein kinase II substrate motif	+	HTP							0.898287	6.76641e-35	128.62	123.5	120.42	-0.35445	8.888	294300000	478380000	376	NaN	8.888	Q9D2C2-2;Q9D2C2	376;376	Q9D2C2-2	Q9D2C2-2	Protein SAAL1	Saal1	QNMEHCQKKPENPSESDTEEPTICGPTQDDF	KPENPsEsDtEEPtI
	-0.48461	S	2		___1	14-3-3 domain binding motif;Calmodulin-dependent protein kinase II substrate motif;Calmodulin-dependent protein kinase IV substrate motif;Casein kinase II substrate motif;Chk1 kinase substrate motif;MDC1 BRCT domain binding motif;PAK2 kinase substrate motif;PKA kinase substrate motif;PKA, PKG kinase substrate motif;PKC epsilon kinase substrate motif;PKC kinase substrate motif;PKG kinase substrate…	+	HTP							0.999164	1.49787e-09	125.36	115.13	101.78	0.29027	8.48487	108410000	196990000	6	NaN	8.48487	E0CX50;E0CZ17;Q8BR75;E9Q6P8;Q3TGY1;Q9DBU6	6;6;6;6;6;6	E0CX50	E0CX50	Serine/Arginine-related protein 53	Rsrc1	__________MGRRSSDTEEESRSKRKKKHR	__MGRRssDtEEESR
	-0.484005	S	2		___1	14-3-3 domain binding motif;Akt kinase substrate motif;Calmodulin-dependent protein kinase II substrate motif;Casein kinase II substrate motif;G protein-coupled receptor kinase 1 substrate motif;GSK3 kinase substrate motif;MAPKAPK1 kinase substrate motif;PKA kinase substrate motif;PKC kinase substrate motif									0.994075	1.36908e-06	95.57	90.511	74.789	-0.070303	7.32605	8973500	12212000	326	NaN	7.32605	Q3UJB0	326	Q3UJB0	Q3UJB0		Sf3b2	RNRKKKKKPQRVRAASSESSGDREKDSGRSR
	-0.483884	Y	3		___1	EGFR kinase substrate motif;Src kinase substrate motif;TC-PTP phosphatase substrate motif	+	HTP							1	2.94324e-17	79.209	79.209	79.209	-0.030835	8.86997	308170000	433090000	13	NaN	8.86997	Q9Z1N5	13	Q9Z1N5	Q9Z1N5	Spliceosome RNA helicase Ddx39b	Ddx39b	___MAENDVDNELLDYEDDEVETAAGADGTE	VDNELLDyEDDEVET
	-0.482392	S	2		___2	G protein-coupled receptor kinase 1 substrate motif;GSK3 kinase substrate motif	+	HTP							0.999997	0.000546885	55.437	55.437	55.437	-0.69688	8.13856	58553000	79027000	34	NaN	8.13856	Q3U1Z5;G3UZQ1	34;34	Q3U1Z5	Q3U1Z5	G-protein-signaling modulator 3	Gpsm3	DQGWPPVNATARPWRSAPPSPPPPGTRHTAL	ATARPWRsAPPsPPP
	-0.482392	S	2		___2	DNA dependent Protein kinase substrate motif;ERK1,2 kinase substrate motif;G protein-coupled receptor kinase 1 substrate motif;GSK-3, ERK1, ERK2, CDK5 substrate motif;MAPKAPK2 kinase substrate motif;WW domain binding motif	+	HTP							0.99972	3.62477e-05	81.327	81.327	55.437	-0.69688	8.53695	158520000	185790000	38	NaN	8.53695	Q3U1Z5;G3UZQ1	38;38	Q3U1Z5	Q3U1Z5	G-protein-signaling modulator 3	Gpsm3	PPVNATARPWRSAPPSPPPPGTRHTALGPRS	PWRsAPPsPPPPGtR
	-0.481505	S	2		___1	Casein kinase II substrate motif	+	CST;HTP							0.998741	1.0441e-30	161.46	137.44	161.46	-0.18448	9.01212	433890000	594450000	25	NaN	9.01212	P97801	25	P97801	P97801	Survival motor neuron protein	Smn1	SEQEDTVLFRRGTGQSDDSDIWDDTALIKAY	FRRGtGQsDDsDIWD
	-0.480659	S	2		___1	Casein kinase II substrate motif;ERK1,2 kinase substrate motif;G protein-coupled receptor kinase 1 substrate motif;Growth associated histone HI kinase substrate motif;GSK3 kinase substrate motif;GSK-3, ERK1, ERK2, CDK5 substrate motif;PKA kinase substrate motif;PKC kinase substrate motif;WW domain binding motif	+	HTP							1	4.7212e-13	118.72	118.72	112.82	0.10406	8.16808	60816000	86447000	1723	NaN	8.16808	Q9QX47-2;Q9QX47-4;H9KV01;H9KV15;Q9QX47-3;Q9QX47;H9KV00	1723;1683;1723;1723;1683;1723;1723	Q9QX47-2	Q9QX47-2	Protein SON	Son	SLPIKESAQAVAVALSPKESSEDTEVPLPNK	QAVAVALsPKESSED
	-0.480559	S	2		___1	Casein kinase II substrate motif;ERK1,2 kinase substrate motif;GSK-3, ERK1, ERK2, CDK5 substrate motif;WW domain binding motif	+	CST;HTP							0.939617	0.00037006	83.229	68.3	67.661	0.039101	8.23674	57918000	114560000	200	NaN	8.23674	Q91VL8	200	Q91VL8	Q91VL8	Telomeric repeat-binding factor 2-interacting protein 1	Terf2ip	LRGQEHKYLLGNAPVSPSSQKLKRKAEQDPE	LLGNAPVsPssQKLK
	-0.479814	S	2		___1	ERK1,2 kinase substrate motif;GSK-3, ERK1, ERK2, CDK5 substrate motif;MDC1 BRCT domain binding motif;PKA kinase substrate motif;PKC kinase substrate motif;Plk1 PBD domain binding motif;WW domain binding motif	+	CST;HTP							0.848165	2.69921e-05	98.156	62.634	85.813	0.77002	9.09722	535040000	715900000	183	NaN	9.09722	Q8K2F8	183	Q8K2F8	Q8K2F8	Protein LSM14 homolog A	Lsm14a	QDTRSVKPQLAQGRSSPQLDPLRKSPTMEQA	QLAQGRssPQLDPLR
	-0.479533	S	3		___1	b-Adrenergic Receptor kinase substrate motif;Casein kinase I substrate motif;G protein-coupled receptor kinase 1 substrate motif									0.995488	0.00297537	48.391	42.676	48.391	-1.1111	7.2987	5584600	14308000	155	NaN	7.2987	Q9DC47	155	Q9DC47	Q9DC47		Zfp869	YDYKELRGGHTEENDSEGNQCEKTSGSLQKE
	-0.478869	S	2		___1	14-3-3 domain binding motif;Calmodulin-dependent protein kinase II substrate motif;Casein kinase II substrate motif;G protein-coupled receptor kinase 1 substrate motif;GSK3 kinase substrate motif;PKA kinase substrate motif;PKC kinase substrate motif	+	HTP							0.99895	1.61702e-55	192.62	192.62	166.53	0.15719	9.63765	1887500000	2454100000	87	NaN	9.63765	P97825	87	P97825	P97825	Hematological and neurological expressed 1 protein	Hn1	GGREDSESPGTQRSNSSEASSGDFLDLKGEG	PGTQRsNssEASsGD
	-0.478206	S	2		___1	14-3-3 domain binding motif;Aurora-A kinase substrate motif;Calmodulin-dependent protein kinase II substrate motif;Casein kinase II substrate motif;PAK2 kinase substrate motif;Phosphorylase kinase substrate motif;PKA kinase substrate motif;PKC epsilon kinase substrate motif;PKC kinase substrate motif	+	HTP							1	0.0037088	93.325	50.976	74.6	-0.52673	9.13078	577110000	774290000	188	NaN	9.13078	O89110	188	O89110	O89110	Caspase-8;Caspase-8 subunit p18;Caspase-8 subunit p10	Casp8	GKIEDYERSSTERRMSLEGREELPPSVLDEM	SSTERRMsLEGREEL
	-0.478125	S	4		___1	Casein kinase II substrate motif;G protein-coupled receptor kinase 1 substrate motif;MAPKAPK2 kinase substrate motif	+	CST;HTP							0.999958	8.3941e-44	138.13	138.13	133.46	0.60006	9.11813	505820000	806830000	125	NaN	9.11813	Q78ZA7	125	Q78ZA7	Q78ZA7	Nucleosome assembly protein 1-like 4	Nap1l4	ITGDVEPTDAESAWHSENEEEDKLAGDMKNK	DAEsAWHsENEEEDK
	-0.475836	S	2		___1	14-3-3 domain binding motif;Calmodulin-dependent protein kinase II substrate motif;Casein kinase II substrate motif;ERK1,2 kinase substrate motif;GSK-3, ERK1, ERK2, CDK5 substrate motif;MAPKAPK2 kinase substrate motif;MDC1 BRCT domain binding motif;PKA kinase substrate motif;PKC epsilon kinase substrate motif;PKC kinase substrate motif;Plk1 PBD domain binding motif;WW domain binding motif	+	CST;HTP							0.972799	0.0141155	60.398	21.831	60.398	-0.79915	7.67327	19767000	27360000	948	NaN	7.67327	Q9Z0U1	948	Q9Z0U1	Q9Z0U1	Tight junction protein ZO-2	Tjp2	RSSEPVQHEENIRKSSPEPRAQMRRAASRDQ	EENIRKssPEPRAQM
	-0.474793	T	2		___1	b-Adrenergic Receptor kinase substrate motif;ERK1,2 kinase substrate motif;GSK3, Erk1, Erk2 and CDK5 kinase motif;GSK-3, ERK1, ERK2, CDK5 substrate motif;MAPKAPK2 kinase substrate motif;WW domain binding motif									0.998473	0.0137975	44.968	44.968	44.968	-0.63501	8.90393	355440000	446100000	359	NaN	8.90393	Q0QWG9-2;Q0QWG9-3;Q0QWG9	359;366;538	Q0QWG9-2	Q0QWG9-2	Delphilin	Grid2ip	IPGERQAGDGTSLPETPNPKMMSAVYAELES
	-0.47323	S	2		___1	14-3-3 domain binding motif;Calmodulin-dependent protein kinase II substrate motif;Calmodulin-dependent protein kinase IV substrate motif;Casein kinase II substrate motif;PKA kinase substrate motif;PKC kinase substrate motif;ZIP kinase substrate motif	+	HTP							0.943988	0.000132898	109.79	67.452	95.775	-3.1111	8.33033	101170000	112780000	359	NaN	8.33033	Q80WQ6	359	Q80WQ6	Q80WQ6	Inactive rhomboid protein 2	Rhbdf2	GVVGNWLNRSYRRSISSTVQRQLESFDSHRP	RSYRRsIssTVQRQL
	-0.471169	S	2		___1	Casein kinase II substrate motif;DNA dependent Protein kinase substrate motif;MAPKAPK2 kinase substrate motif	+	CST;HTP							0.987703	3.12741e-12	122.01	73.111	92.474	-0.097463	8.05869	49847000	64626000	565	NaN	8.05869	Q80XQ2	565	Q80XQ2	Q80XQ2	TBC1 domain family member 5	Tbc1d5	QLNKGQSSKTISSSPSIESLPGGREFTGSPP	KTIsssPsIEsLPGG
	-0.470529	S	2		___1	Casein kinase II substrate motif;PKA kinase substrate motif;PKC kinase substrate motif;Pyruvate dehydrogenase kinase substrate motif	+	HTP;LTP							1	2.95136e-32	174.95	167.49	56.25	0.21199	10.2794	8218300000	10812000000	5	NaN	10.2794	Q61233;D3YZ25;D3YVW8;D3Z7D9;D3Z311	5;5;5;5;5	Q61233	Q61233	Plastin-2	Lcp1	___________MARGSVSDEEMMELREAFAK	___MARGsVsDEEMM
	-0.470109	S	2		___1	Cdc2 kinase substrate motif;CDK kinase substrate motif;CDK1,2,4,6 kinase substrate motif;ERK1,2 kinase substrate motif;G protein-coupled receptor kinase 1 substrate motif;GSK-3, ERK1, ERK2, CDK5 substrate motif;PKA kinase substrate motif;PKC kinase substrate motif;WW domain binding motif	+	HTP							0.998606	0.0303417	89.047	54.661	69.275	-0.22312	8.46793	122780000	170950000	582	NaN	8.46793	E9QL13;Q8C2Q3-2;Q8C2Q3	582;582;582	E9QL13	E9QL13	RNA-binding protein 14	Rbm14	ANANSTPPPYERTRLSPPRASYDDPYKKAVA	PyERtRLsPPRASYD
	-0.46907	S	2		___1	ATM kinase substrate motif;Casein kinase II substrate motif;DNA dependent Protein kinase substrate motif;PAK2 kinase substrate motif;Pim1 kinase substrate sequence;PKA kinase substrate motif;PKC kinase substrate motif;Pyruvate dehydrogenase kinase substrate motif	+	CST;HTP							0.999616	3.54036e-09	110.97	83.709	110.97	0.43355	7.85403	27460000	43994000	98	NaN	7.85403	F8WH48;E0CYH4;Q8C6G8	98;101;101	F8WH48	F8WH48	WD repeat-containing protein 26	Wdr26	ATPELGSSLKKKKRLSQSDEDVIRLIGQHLN	LKKKKRLsQsDEDVI
	-0.466975	S	2		___1	14-3-3 domain binding motif;Akt kinase substrate motif;Calmodulin-dependent protein kinase II substrate motif;G protein-coupled receptor kinase 1 substrate motif;MAPKAPK1 kinase substrate motif;MDC1 BRCT domain binding motif;PKA kinase substrate motif;PKC kinase substrate motif;Plk1 PBD domain binding motif	+	HTP							0.999809	3.34553e-19	153.75	138.12	126.65	0.38353	8.80968	262260000	382920000	377	NaN	8.80968	S4R2J8;S4R1B8;D3Z6Q9;S4R270	377;382;392;409	S4R2J8	S4R2J8	Bridging integrator 2	Bin2	DTPSPGDVVLRARASSEGAEQSKRAASIQRT	VLRARAssEGAEQSK
	-0.464982	S	3		___1	Calmodulin-dependent protein kinase II substrate motif;Chk1 kinase substrate motif;G protein-coupled receptor kinase 1 substrate motif;PKA kinase substrate motif;PKC kinase substrate motif	+	HTP							0.996616	6.92696e-08	106.32	67.317	106.32	-0.16176	8.83112	285120000	392720000	641	NaN	8.83112	Q99KG3-2;Q99KG3-3;Q99KG3	641;717;718	Q99KG3-2	Q99KG3-2	RNA-binding protein 10	Rbm10	LAERQHTSMDLPKLASDDRPSPPRGLVAAYS	MDLPKLAsDDRPsPP
	-0.463768	S	2		___1	b-Adrenergic Receptor kinase substrate motif;Casein kinase II substrate motif;ERK1,2 kinase substrate motif;G protein-coupled receptor kinase 1 substrate motif;GSK3 kinase substrate motif;GSK-3, ERK1, ERK2, CDK5 substrate motif;PKA kinase substrate motif;PKC kinase substrate motif;WW domain binding motif	+	CST;HTP							0.999969	0.000259902	113.93	60.17	106.62	0.14081	8.4816	132420000	170680000	697	NaN	8.4816	Q61165	697	Q61165	Q61165	Sodium/hydrogen exchanger 1	Slc9a1	QKITNYLTVPAHKLDSPTLSRARIGSDPLAY	VPAHKLDsPtLsRAR
	-0.463768	S	2		___2	14-3-3 domain binding motif;Calmodulin-dependent protein kinase II substrate motif;Cdc2 kinase substrate motif;CDK kinase substrate motif;CDK1,2,4,6 kinase substrate motif;CLK1 kinase substrate motif;ERK1,2 kinase substrate motif;G protein-coupled receptor kinase 1 substrate motif;GSK3 kinase substrate motif;GSK-3, ERK1, ERK2, CDK5 substrate motif;PKA kinase substrate motif;PKC kinase substrate m…	+	HTP							1	0.00116126	60.178	56.106	46.768	1.1514	7.47729	12310000	17703000	144	NaN	7.47729	A2ASY0;Q5HZG4	144;297	A2ASY0	A2ASY0	Transcription initiation factor TFIID subunit 3	Taf3	KTKSPKAALSPARLGSPIRSPKTIPKEKKSP	LsPARLGsPIRsPKT
	-0.463768	S	2		___2	Casein kinase II substrate motif;ERK1,2 kinase substrate motif;Growth associated histone HI kinase substrate motif;GSK-3, ERK1, ERK2, CDK5 substrate motif;MAPKAPK2 kinase substrate motif;PKA kinase substrate motif;PKC kinase substrate motif;WW domain binding motif	+	HTP							1	0.00116126	60.178	56.106	46.768	1.1514	7.47729	12310000	17703000	148	NaN	7.47729	A2ASY0;Q5HZG4	148;301	A2ASY0	A2ASY0	Transcription initiation factor TFIID subunit 3	Taf3	PKAALSPARLGSPIRSPKTIPKEKKSPGRSK	RLGsPIRsPKTIPKE
	-0.459854	T	2		___1	Akt kinase substrate motif;Calmodulin-dependent protein kinase II substrate motif;G protein-coupled receptor kinase 1 substrate motif;MAPKAPK2 kinase substrate motif;PKC kinase substrate motif	+	CST;HTP;LTP							0.962797	0.0080842	89.171	68.59	74.841	-0.18088	8.00393	44440000	56472000	346	NaN	8.00393	Q62433	346	Q62433	Q62433	Protein NDRG1	Ndrg1	GSSVTSLEGTRSRSHTSEGPRSRSHTSEGSR	GtRsRsHtsEGPRsR
	-0.45904	S	2		___2	Casein kinase II substrate motif;G protein-coupled receptor kinase 1 substrate motif;GSK3 kinase substrate motif;Pyruvate dehydrogenase kinase substrate motif	+	HTP							0.999637	1.15151e-30	152.48	147.58	112.47	0.29572	9.2403	705340000	1033600000	1509	NaN	9.2403	Q64511	1509	Q64511	Q64511	DNA topoisomerase 2-beta	Top2b	AKRAPKQKKIVETINSDSDSEFGIPKKTTTP	KIVEtINsDsDsEFG
	-0.45904	S	2		___2	b-Adrenergic Receptor kinase substrate motif;Casein kinase II substrate motif	+	HTP							0.974652	1.15151e-30	152.48	147.58	152.48	0.13622	8.9799	419350000	535430000	1511	NaN	8.9799	Q64511	1511	Q64511	Q64511	DNA topoisomerase 2-beta	Top2b	RAPKQKKIVETINSDSDSEFGIPKKTTTPKG	VEtINsDsDsEFGIP
	-0.455356	S	2		___1	Casein kinase II substrate motif;MDC1 BRCT domain binding motif;Plk1 PBD domain binding motif									0.822007	2.16325e-09	116.51	76.726	103.76	-0.096529	7.75256	20897000	35670000	1090	NaN	7.75256	Q61687	1090	Q61687	Q61687	Transcriptional regulator ATRX	Atrx	SLPAKSPGKRPECSSSDTEKSLKGQCCDSTE
	-0.455218	S	2		___1	Casein kinase I substrate motif;Casein kinase II substrate motif;DNA dependent Protein kinase substrate motif	+	HTP							0.79423	0.000141673	99.442	81.48	99.442	0.18402	7.26243	6914200	11384000	564	NaN	7.26243	Q8K2Y0;G3X8V5	564;564	Q8K2Y0	Q8K2Y0	RING finger protein 219	Rnf219	SPCNNGFKSVEVEGPSKSPQGREFLEEPDKL	SVEVEGPsKsPQGRE
	-0.451938	S	2		___1	14-3-3 domain binding motif;Calmodulin-dependent protein kinase II substrate motif;Casein kinase II substrate motif;MAPKAPK1 kinase substrate motif;PAK2 kinase substrate motif;Pim1 kinase substrate sequence;PKA kinase substrate motif;PKC epsilon kinase substrate motif;PKC kinase substrate motif;ZIP kinase substrate motif	+	CST;HTP							0.907695	0.000318176	77.746	38.016	75.445	-0.43649	7.42062	15039000	11301000	12	NaN	7.42062	Q9CQN9;E9Q1L5;Q8BUH8	12;12;12	Q9CQN9	Q9CQN9	Sentrin-specific protease 7	Senp7	____MDRARPGRRRASSEIVTEGKRKKSSPA	RPGRRRAssEIVTEG
	-0.44904	S	3		___1	14-3-3 domain binding motif;Akt kinase substrate motif;Calmodulin-dependent protein kinase II substrate motif;Casein kinase II substrate motif;MAPKAPK1 kinase substrate motif;PKA kinase substrate motif;PKC kinase substrate motif	+	HTP							0.987756	2.94127e-15	123.61	111.54	123.61	0.092552	7.80099	27630000	35610000	901	NaN	7.80099	S4R294;S4R2J9;Q3TLH4-5;Q3TLH4	901;899;901;901	S4R294	S4R294	Protein PRRC2C	Prrc2c	RISALESQPARKRSVSHGSNHAQNAEEQRNE	PARKRsVsHGsNHAQ
	-0.447052	S	3		___1	ERK1,2 kinase substrate motif;GSK-3, ERK1, ERK2, CDK5 substrate motif;PKA kinase substrate motif;PKC kinase substrate motif;WW domain binding motif	+	HTP							1	1.94201e-11	114.55	84.507	96.447	-0.0043004	8.9056	496400000	308240000	169	NaN	8.9056	E9Q1P8	169	E9Q1P8	E9Q1P8	Interferon regulatory factor 2-binding protein 2	Irf2bp2	NGFSKLEEPPELNRQSPNPRRAHAVPPTLVP	PPELNRQsPNPRRAH
	-0.446817	S	2		___2	ERK1,2 kinase substrate motif;GSK-3, ERK1, ERK2, CDK5 substrate motif;WW domain binding motif	+	CST;HTP							0.98681	2.5332e-08	112.53	102.39	86.539	1.0683	8.28565	83128000	109920000	1221	NaN	8.28565	E9Q8K8;Q6ZPZ3-2;Q6ZPZ3	1221;1187;1270	E9Q8K8	E9Q8K8	Zinc finger CCCH domain-containing protein 4	Zc3h4	TLFGTVKPAPKTGTGSPFAGNSPAREGEQDA	APKtGtGsPFAGNsP
	-0.446817	S	2		___2	Cdc2 kinase substrate motif;CDK kinase substrate motif;CDK1,2,4,6 kinase substrate motif;ERK1,2 kinase substrate motif;GSK-3, ERK1, ERK2, CDK5 substrate motif;WW domain binding motif	+	CST;HTP							0.999998	2.5332e-08	112.53	102.39	82.609	0.21332	8.28565	83128000	109920000	1227	NaN	8.28565	E9Q8K8;Q6ZPZ3-2;Q6ZPZ3	1227;1193;1276	E9Q8K8	E9Q8K8	Zinc finger CCCH domain-containing protein 4	Zc3h4	KPAPKTGTGSPFAGNSPAREGEQDAGSLKDV	GsPFAGNsPAREGEQ
	-0.445166	S	3		___2	b-Adrenergic Receptor kinase substrate motif;Casein kinase II substrate motif;PKA kinase substrate motif;Pyruvate dehydrogenase kinase substrate motif	+	HTP							0.823832	0.000329126	63.998	60.466	41.878	0.49536	6.95731	5316600	3747200	641	NaN	6.95731	Q8K327	641	Q8K327	Q8K327	Chromosome alignment-maintaining phosphoprotein 1	Champ1	YIRADLDTLDTKGQESSSDQEQVDVESIDFS	LDTKGQEsssDQEQV
	-0.44438	S	3		___1	Casein kinase II substrate motif	+	HTP							0.997056	3.83768e-07	63.701	55.828	63.701	0.6034	7.8418	23366000	46106000	197	NaN	7.8418	Q8QZW8	197	Q8QZW8	Q8QZW8		Arhgap9	ELRLSGSGPAELAELSAGEDDELESEPVSKS	PAELAELsAGEDDEL
	-0.44436	S	2		___2	b-Adrenergic Receptor kinase substrate motif;Casein kinase I substrate motif;ERK1,2 kinase substrate motif;GSK-3, ERK1, ERK2, CDK5 substrate motif;MAPKAPK2 kinase substrate motif;WW domain binding motif	+	HTP							0.999994	6.273e-48	165.48	160.36	124.17	-0.29476	8.8196	294660000	365420000	15	NaN	8.8196	D3Z478;D3YYS7;Q9D0L8-2;Q9D0L8-3;Q9D0L8;D3Z4K1	15;15;15;15;15;15	D3Z478	D3Z478	mRNA cap guanine-N7 methyltransferase	Rnmt	_MEGSAKASVASDPESPPGGNEPAAASGQRL	sVAsDPEsPPGGNEP
	-0.443752	S	3		___2	b-Adrenergic Receptor kinase substrate motif;Casein kinase I substrate motif;Casein kinase II substrate motif;G protein-coupled receptor kinase 1 substrate motif;GSK3 kinase substrate motif	+	CST;HTP							0.999984	7.54187e-28	118.46	115.1	118.46	0.74652	8.93871	386660000	481730000	37	NaN	8.93871	Q9Z2R6;B1AQD9	37;37	Q9Z2R6	Q9Z2R6	Protein unc-119 homolog A	Unc119	NRSAEPTREPGAEAESGSESEPEPGPGPRLG	EPGAEAEsGsEsEPE
	-0.443752	S	3		___2	Casein kinase I substrate motif;Casein kinase II substrate motif;G protein-coupled receptor kinase 1 substrate motif	+	CST;HTP							0.998092	7.54187e-28	118.46	115.1	118.46	0.74652	8.93871	386660000	481730000	39	NaN	8.93871	Q9Z2R6;B1AQD9	39;39	Q9Z2R6	Q9Z2R6	Protein unc-119 homolog A	Unc119	SAEPTREPGAEAESGSESEPEPGPGPRLGPL	GAEAEsGsEsEPEPG
	-0.442869	S	2		___1										0.820554	4.11105e-20	132.67	105.88	121.77	-0.21268	7.915	33414000	48811000	312	NaN	7.915	P15702	312	P15702	P15702	Leukosialin	Spn	WAGPARVPDEEATTTSGAGGNKGSEVLETEG
	-0.441654	Y	2		___1	3BP2 SH2 domain binding motif;ALK kinase substrate motif;Fes SH2 domain binding motif;Itk SH2 domain binding motif;JAK2 kinase substrate motif;SHC SH2 domain binding motif;Src kinase substrate motif	+	CST;HTP							1	5.73489e-16	124.04	115.7	123.14	0.065007	8.64575	190830000	251510000	165	8.60542	7.59351	Q3U1F9	165	Q3U1F9	Q3U1F9	Phosphoprotein associated with glycosphingolipid-enriched microdomains 1	Pag1	ARAADTELGPGVEGPYEVLKDSSSQENMVED	GPGVEGPyEVLKDss
	-0.441497	S	2		___1	14-3-3 domain binding motif;b-Adrenergic Receptor kinase substrate motif;Calmodulin-dependent protein kinase II substrate motif;Casein kinase II substrate motif;G protein-coupled receptor kinase 1 substrate motif;PKA kinase substrate motif;PKC kinase substrate motif	+	HTP							0.995167	1.46717e-33	165.64	129.35	165.64	-0.17627	7.78089	30121000	30259000	1515	NaN	7.78089	Q8BTI8;Q8BTI8-2;Q8BTI8-3	1515;1419;1515	Q8BTI8	Q8BTI8	Serine/arginine repetitive matrix protein 2	Srrm2	ELDGKPSASPQERSESDSSPDSKPKTRTPLR	sPQERsEsdSSPDSK
	-0.441458	S	3		___1	14-3-3 domain binding motif;Akt kinase substrate motif;AMP-activated protein kinase 2 substrate motif;Calmodulin-dependent protein kinase II substrate motif;ERK1,2 kinase substrate motif;Growth associated histone HI kinase substrate motif;GSK-3, ERK1, ERK2, CDK5 substrate motif;MAPKAPK1 kinase substrate motif;PKA kinase substrate motif;PKC kinase substrate motif;WW domain binding motif	+	HTP							0.971185	0.0036559	42.802	35.437	40.616	-0.48326	8.45948	123040000	165020000	2860	NaN	8.45948	F6SMY7;Q7TPH6-2;Q7TPH6;E9PUJ6;F7CZG3	2860;2932;2932;2970;571	F6SMY7	F6SMY7	Probable E3 ubiquitin-protein ligase MYCBP2	Mycbp2	KKKMPLTEPLRGRSTSPKPKPVPKDPKDSPG	PLRGRstsPKPKPVP
	-0.440675	S	3		___1	ERK1,2 kinase substrate motif;G protein-coupled receptor kinase 1 substrate motif;Growth associated histone HI kinase substrate motif;GSK3 kinase substrate motif;GSK-3, ERK1, ERK2, CDK5 substrate motif;PKA kinase substrate motif;PKC kinase substrate motif;WW domain binding motif	+	HTP							0.999612	0.000561182	72.2	51.994	53.237	0.39143	8.28932	83846000	110840000	11	NaN	8.28932	P51125-3;P51125-2;P51125	11;11;11	P51125-3	P51125-3	Calpastatin	Cast	_____MSQPGPKPAASPRPSRGAAARHTQEH	PGPKPAAsPRPSRGA
	-0.4404	S	3		___1	ERK1,2 kinase substrate motif;G protein-coupled receptor kinase 1 substrate motif;GSK-3, ERK1, ERK2, CDK5 substrate motif;WW domain binding motif	+	HTP							0.991913	3.71865e-11	102.21	102.21	90.836	-0.20815	8.35578	91589000	135280000	293	NaN	8.35578	O08539-2;Q6P1B9;O08539	293;293;324	O08539-2	O08539-2	Myc box-dependent-interacting protein 1	Bin1	PEIRVNHEPEPASGASPGATIPKSPSQPAEA	PEPASGAsPGAtIPK
	-0.43735	S	2		___1	14-3-3 domain binding motif;Calmodulin-dependent protein kinase II alpha substrate motif;Calmodulin-dependent protein kinase II substrate motif;Calmodulin-dependent protein kinase IV substrate motif;Chk1 kinase substrate motif;MAPKAPK2 kinase substrate motif;PKA kinase substrate motif;PKC kinase substrate motif	+	CST;HTP							0.987172	1.2962e-06	86.016	80.139	86.016	0.65713	7.77513	25977000	33607000	105	NaN	7.77513	G3UZM6;G3UZD6;Q9ES00	105;105;105	G3UZM6	G3UZM6	Ubiquitin conjugation factor E4 B	Ube4b	SNSLETQSQSLSRSQSMDIDGVSCEKSMSQV	QSLsRsQsMDIDGVS
	-0.43733	S	2		___1	Casein kinase I substrate motif;Casein kinase II substrate motif;ERK1,2 kinase substrate motif;G protein-coupled receptor kinase 1 substrate motif;GSK-3, ERK1, ERK2, CDK5 substrate motif;WW domain binding motif	+	HTP							0.997927	6.9281e-36	155.94	155.94	155.94	0.14486	9.41631	1145900000	1462100000	1683	NaN	9.41631	Q8C3J5	1683	Q8C3J5	Q8C3J5	Dedicator of cytokinesis protein 2	Dock2	ESAPPKTPKVEEEPISPGSTLPEVKLRRSKK	KVEEEPIsPGstLPE
	-0.435417	S	2		___2	Casein kinase II substrate motif	+	CST;HTP							0.979325	2.66585e-05	83.964	73.683	52.191	0.70453	9.00355	365500000	642660000	1649	NaN	9.00355	Q8BTI8;Q8BTI8-2;Q8BTI8-3	1649;1553;1649	Q8BTI8	Q8BTI8	Serine/arginine repetitive matrix protein 2	Srrm2	PKTKSHTPPRRRSSRSSPELTRKARVSRRSR	PRRRssRssPELtRK
	-0.434637	S	3		___1	Casein kinase II substrate motif									0.999613	1.02199e-12	128.21	128.21	128.21	0.52705	7.31475	9690000	10952000	249	NaN	7.31475	Q811M1-2;B1AW40;Q811M1	249;249;249	Q811M1-2	Q811M1-2	Rho GTPase-activating protein 15	Arhgap15	PEHRKSFMFRLHHSASDTSDKNRVKSRLKKF
	-0.432902	S	2		___1	Casein kinase II substrate motif;G protein-coupled receptor kinase 1 substrate motif;GSK3 kinase substrate motif;PKA kinase substrate motif;PKC kinase substrate motif	+	HTP							0.999997	7.99855e-06	91.969	82.188	91.969	-1.1951	8.5608	159500000	204250000	101	NaN	8.5608	Q3U9G9	101	Q3U9G9	Q3U9G9	Lamin-B receptor	Lbr	SRSRSPGRAPKGSRRSVSASHEGDVKEKKEK	APKGSRRsVsAsHEG
	-0.431676	S	3		___1	AMP-activated protein kinase substrate motif;ATM kinase substrate motif;Calmodulin-dependent protein kinase II substrate motif;Chk1 kinase substrate motif;DNA dependent Protein kinase substrate motif;PKA kinase substrate motif;PKC kinase substrate motif	+	CST;HTP							0.999991	1.79e-91	220.17	212.66	208.92	-0.09169	9.18761	637280000	903030000	1066	NaN	9.18761	S4R1M0;P06800-3;S4R2V1;P06800-2;S4R2V2;P06800;S4R1S4	1066;1088;1090;1184;1186;1227;1229	S4R1M0	S4R1M0	Receptor-type tyrosine-protein phosphatase C	Ptprc	ASIYPAQNGQVKKTNSQDKIEFHNEVDGGKQ	GQVKKtNsQDKIEFH
	-0.431267	S	2		___1	DNA dependent Protein kinase substrate motif;ERK1,2 kinase substrate motif;G protein-coupled receptor kinase 1 substrate motif;GSK-3, ERK1, ERK2, CDK5 substrate motif;WW domain binding motif	+	CST;HTP							1	7.10222e-09	103.79	103.79	67.326	0.22112	8.81757	276090000	380910000	664	NaN	8.81757	Q8BHL3	664	Q8BHL3	Q8BHL3	TBC1 domain family member 10B	Tbc1d10b	PSLKSRGSRAVGGAPSPPPPVRRASAGPVPG	RAVGGAPsPPPPVRR
	-0.43082	S	2		___3	b-Adrenergic Receptor kinase substrate motif;Casein kinase II substrate motif	+	HTP							0.808827	6.22733e-06	84.68	73.871	84.68	0.42285	7.38634	11865000	12476000	78	NaN	7.38634	Q9EPR4-2;Q9EPR4	78;78	Q9EPR4-2	Q9EPR4-2	Solute carrier family 23 member 2	Slc23a2	ENGIAEKSSLAETLDSTGSLDPQRSDMIYTI	sLAEtLDstGsLDPQ
	-0.43082	S	2		___3		+	HTP							0.977209	6.22733e-06	84.68	73.871	69.845	0.13617	6.99382	1987900	7870700	81	NaN	6.99382	Q9EPR4-2;Q9EPR4	81;81	Q9EPR4-2	Q9EPR4-2	Solute carrier family 23 member 2	Slc23a2	IAEKSSLAETLDSTGSLDPQRSDMIYTIEDV	EtLDstGsLDPQRSD
	-0.429265	T	2		___1	Calmodulin-dependent protein kinase II substrate motif;GSK-3, ERK1, ERK2, CDK5 substrate motif;PAK2 kinase substrate motif;PKA kinase substrate motif;PKC kinase substrate motif;WW domain binding motif	+	HTP							1	1.09827e-13	130.56	130.56	120.11	-0.32156	8.8865	350500000	419520000	429	NaN	8.8865	E9PUF7;Q61210-5;F6ZN61	429;432;133	E9PUF7	E9PUF7	Rho guanine nucleotide exchange factor 1	Arhgef1	DPGSATAVLGPTRRATPEPGDDGEPGRSGLE	LGPTRRAtPEPGDDG
	-0.42711	S	2		___1	14-3-3 domain binding motif;Calmodulin-dependent protein kinase II substrate motif;Calmodulin-dependent protein kinase IV substrate motif;Chk1 kinase substrate motif;PKA kinase substrate motif;PKC kinase substrate motif	+	CST;HTP							1	8.93625e-14	121.77	99.447	87.496	0.90922	8.20634	75979000	84842000	992	NaN	8.20634	D3Z5I9;Q9CXK9	992;1032	D3Z5I9	D3Z5I9	RNA-binding protein 33	Rbm33	DTKPGVKRTVMHRANSGGGGDGPHVSSKVRV	TVMHRANsGGGGDGP
	-0.426141	T	2		___1	b-Adrenergic Receptor kinase substrate motif;Calmodulin-dependent protein kinase II substrate motif;PKC kinase substrate motif									0.959492	0.00904246	66.27	53.262	66.27	-0.26205	7.11464	4727900	8293500	687	NaN	7.11464	Q6IQX8	687	Q6IQX8	Q6IQX8		Zfp219	HHSRRARGRRQPRADTSPTYVRAPSGETPPS
	-0.425637	S	2		___1	Casein kinase II substrate motif	+	HTP							0.982492	1.49541e-06	94.845	83.379	94.845	-0.55823	7.83518	31802000	36618000	366	NaN	7.83518	Q6ZQK5-2;Q6ZQK5	366;384	Q6ZQK5-2	Q6ZQK5-2	Arf-GAP with coiled-coil, ANK repeat and PH domain-containing protein 2	Acap2	DESEKLDKKSSPSTGSLDSGNESKEKLLKGE	KssPstGsLDsGNES
	-0.424204	S	3		___1	b-Adrenergic Receptor kinase substrate motif;Casein kinase II substrate motif;Pyruvate dehydrogenase kinase substrate motif	+	HTP							0.999963	1.4652e-07	74.876	73.141	74.876	-0.77192	7.98811	42971000	54328000	717	NaN	7.98811	H3BKD4;H3BKE6;Q9QWY8-2;E9QMI7;E9QMJ1;H3BL41;Q9QWY8-4;Q9QWY8-3;H3BJY2;Q9QWY8;E9QN63	717;729;732;732;697;709;717;720;729;732;732	H3BKD4	H3BKD4	Arf-GAP with SH3 domain, ANK repeat and PH domain-containing protein 1	Asap1	HVEYEWNLRQDEMDESDDDLDDKPSPIKKER	RQDEMDEsDDDLDDK
	-0.424029	S	2		___1	G protein-coupled receptor kinase 1 substrate motif;MAPKAPK2 kinase substrate motif;PKA kinase substrate motif;PKC kinase substrate motif	+	CST;HTP							0.999997	0.000356826	78.505	62.521	71.279	0.45703	8.9178	358600000	468970000	129	NaN	8.9178	Q8BH40;O70439	129;129	Q8BH40	Q8BH40	Syntaxin-7	Stx7	REKEFVARVRASSRVSGGFPEDSSKEKNLVS	VRAssRVsGGFPEDs
	-0.423468	S	2		___1	Casein kinase I substrate motif;ERK1,2 kinase substrate motif;G protein-coupled receptor kinase 1 substrate motif;GSK-3, ERK1, ERK2, CDK5 substrate motif;WW domain binding motif	+	CST;HTP							1	1.18664e-17	132.84	124.97	44.299	1.977	9.63685	1862200000	2471400000	83	NaN	9.63685	A2AI69;Q9DBC7	83;83	A2AI69	A2AI69	cAMP-dependent protein kinase type I-alpha regulatory subunit;cAMP-dependent protein kinase type I-alpha regulatory subunit, N-terminally processed	Prkar1a	LQKTGIRTDSREDEISPPPPNPVVKGRRRRG	DsREDEIsPPPPNPV
	-0.423313	S	2		___1	14-3-3 domain binding motif;Akt kinase substrate motif;Calmodulin-dependent protein kinase II substrate motif;Casein kinase II substrate motif;MAPKAPK1 kinase substrate motif;PKA kinase substrate motif;PKC kinase substrate motif	+	HTP							0.899285	0.00189291	85.976	55.492	85.976	-0.85082	7.10428	4316400	8397400	96	NaN	7.10428	Q4V9W2	96	Q4V9W2	Q4V9W2	Protein SREK1IP1	Srek1ip1	SREKIKLKKRRKRSYSSATEEDSAKQKKQKY	KRRKRsyssAtEEDS
	-0.422985	S	2		___2	14-3-3 domain binding motif;Calmodulin-dependent protein kinase II substrate motif;Casein kinase II substrate motif;MAPKAPK1 kinase substrate motif;Pim1 kinase substrate sequence;PKA kinase substrate motif;PKC epsilon kinase substrate motif;PKC kinase substrate motif	+	CST;HTP							1	3.49132e-44	174.2	171.13	162.39	0.82175	8.57274	161630000	212260000	1537	NaN	8.57274	Q64511	1537	Q64511	Q64511	DNA topoisomerase 2-beta	Top2b	TTPKGKGRGAKKRKASGSENEGDYNPGRKPS	GAKKRkAsGsENEGD
	-0.422985	S	2		___2	Casein kinase II substrate motif;G protein-coupled receptor kinase 1 substrate motif;PKA kinase substrate motif	+	CST;HTP							1	3.49132e-44	174.2	171.13	162.39	0.82175	8.56975	166220000	205110000	1539	NaN	8.56975	Q64511	1539	Q64511	Q64511	DNA topoisomerase 2-beta	Top2b	PKGKGRGAKKRKASGSENEGDYNPGRKPSKT	KKRkAsGsENEGDYN
	-0.422695	S	3		___1	14-3-3 domain binding motif;Calmodulin-dependent protein kinase II substrate motif;Casein kinase II substrate motif;DNA dependent Protein kinase substrate motif;PAK2 kinase substrate motif;PKA kinase substrate motif;PKC epsilon kinase substrate motif;PKC kinase substrate motif									0.999945	0.000436303	92.247	62.041	92.247	0.020848	7.84773	29000000	41426000	835	NaN	7.84773	D3Z6Z7;Q8C2K5;Q8C2K5-2	835;857;859	D3Z6Z7	D3Z6Z7	RAS protein activator like-3	Rasal3	RTQSVPARRPTHRRPSAGSKPRPKGSLRMGP
	-0.421728	S	4		___2	DNA dependent Protein kinase substrate motif;ERK1,2 kinase substrate motif;GSK-3, ERK1, ERK2, CDK5 substrate motif;PKA kinase substrate motif;PKC kinase substrate motif;WW domain binding motif	+	HTP							0.999876	2.94656e-24	128.06	128.06	128.06	-0.97859	8.78856	255800000	358750000	194	NaN	8.78856	P97360;E9Q8J8	194;105	P97360	P97360	Transcription factor ETV6	Etv6	LLHRPRSPITTNHRPSPDPEQQRPQRSPLDN	IttNHRPsPDPEQQR
	-0.418871	S	2		___1	Calmodulin-dependent protein kinase II substrate motif;Casein kinase II substrate motif;Chk1 kinase substrate motif;ERK1,2 kinase substrate motif;GSK-3, ERK1, ERK2, CDK5 substrate motif;PKA kinase substrate motif;PKC kinase substrate motif;WW domain binding motif	+	HTP;LTP	+	activity, induced; sumoylation	apoptosis, induced; cell motility, altered; transcription, induced; transcription, altered; cell growth, altered;transcription, altered				1	0.0299324	56.043	27.085	54.259	0.46309	7.48916	14269000	16573000	73	NaN	7.48916	P05627;P15066	73;100	P05627	P05627	Transcription factor AP-1;Transcription factor jun-D	Jun;Jund	SDLLTSPDVGLLKLASPELERLIIQSSNGHI	VGLLKLAsPELERLI;LGLLKLAsPELERLI	ERK1;JNK1;ERK2
	-0.417367	S	2		___1	b-Adrenergic Receptor kinase substrate motif;ERK1,2 kinase substrate motif;GSK-3, ERK1, ERK2, CDK5 substrate motif;WW domain binding motif	+	HTP							1	4.94803e-05	77.221	77.221	66.246	0.54648	8.0258	39879000	66241000	219	NaN	8.0258	O54824-2;O54824	219;917	O54824-2	O54824-2	Pro-interleukin-16;Interleukin-16	Il16	TFPNSSEVRDPGLPESPPPGQRPSTKALSPD	RDPGLPEsPPPGQRP
	-0.416982	S	2		___2	b-Adrenergic Receptor kinase substrate motif;Casein kinase II substrate motif;ERK1,2 kinase substrate motif;Growth associated histone HI kinase substrate motif;GSK-3, ERK1, ERK2, CDK5 substrate motif;PKA kinase substrate motif;PKC kinase substrate motif;Pyruvate dehydrogenase kinase substrate motif;WW domain binding motif	+	CST;HTP							1	6.14716e-10	110.77	105.41	110.77	0.39927	8.04999	42108000	70094000	635	NaN	8.04999	Q3UMU9;Q3UMU9-3	635;644	Q3UMU9	Q3UMU9	Hepatoma-derived growth factor-related protein 2	Hdgfrp2	SEDGPRGGSSEELHDSPRDNSDPAKPGNERQ	ssEELHDsPRDNsDP
	-0.416885	S	3		___2	Casein kinase II substrate motif;G protein-coupled receptor kinase 1 substrate motif;GSK3 kinase substrate motif	+	HTP							0.935583	9.59693e-13	83.601	83.601	83.601	0.47332	8.28147	80407000	110790000	11	NaN	8.28147	D3Z478;D3YYS7;Q9D0L8-2;Q9D0L8-3;Q9D0L8;D3Z4K1	11;11;11;11;11;11	D3Z478	D3Z478	mRNA cap guanine-N7 methyltransferase	Rnmt	_____MEGSAKASVASDPESPPGGNEPAAAS	SAKAsVAsDPEsPPG
	-0.415211	S	2		___1	Casein kinase II substrate motif;Cdc2 kinase substrate motif;CDK kinase substrate motif;CDK1,2,4,6 kinase substrate motif;DNA dependent Protein kinase substrate motif;ERK1,2 kinase substrate motif;G protein-coupled receptor kinase 1 substrate motif;GSK3 kinase substrate motif;GSK-3, ERK1, ERK2, CDK5 substrate motif;WW domain binding motif	+	CST;HTP							1	5.17536e-06	92.109	76.595	92.109	0.0061393	9.61744	1546100000	2598100000	351	NaN	9.61744	Q8BTI8;Q8BTI8-2;Q8BTI8-3	351;255;351	Q8BTI8	Q8BTI8	Serine/arginine repetitive matrix protein 2	Srrm2	EDKDKKEKSAVRPSPSPERSSTGPELPAPTP	sAVRPsPsPERSSTG
	-0.41398	S	2		___1	Casein kinase II substrate motif;DNA dependent Protein kinase substrate motif;ERK1,2 kinase substrate motif;GSK-3, ERK1, ERK2, CDK5 substrate motif;WW domain binding motif									0.854538	0.00430552	47.68	43.884	47.68	-0.71298	6.7539	1868300	3805900	837	NaN	6.7539	Q9CU65	837	Q9CU65	Q9CU65	Zinc finger MYM-type protein 2	Zmym2	CQTSRTKMTGSAPPPSPTPNKEMKNKAILCK
	-0.411982	S	2		___2	b-Adrenergic Receptor kinase substrate motif;Casein kinase II substrate motif;Pyruvate dehydrogenase kinase substrate motif	+	HTP							1	6.87985e-12	124.04	110.86	85.563	-0.049282	8.88172	442140000	319450000	458	NaN	8.88172	Q8C1D8-2;Q8C1D8	458;458	Q8C1D8-2	Q8C1D8-2	Protein IWS1 homolog	Iws1	LEEEKNETQLKEAEDSDSDDNIKRGKHMDFL	QLKEAEDsDsDDNIK
	-0.411982	S	2		___2	b-Adrenergic Receptor kinase substrate motif;Casein kinase I substrate motif	+	HTP							1	6.87985e-12	124.04	110.86	85.563	-0.049282	8.88172	442140000	319450000	460	NaN	8.88172	Q8C1D8-2;Q8C1D8	460;460	Q8C1D8-2	Q8C1D8-2	Protein IWS1 homolog	Iws1	EEKNETQLKEAEDSDSDDNIKRGKHMDFLSD	KEAEDsDsDDNIKRG
	-0.411694	S	2		___1	Casein kinase II substrate motif;DNA dependent Protein kinase substrate motif;ERK1,2 kinase substrate motif;G protein-coupled receptor kinase 1 substrate motif;GSK3 kinase substrate motif;GSK-3, ERK1, ERK2, CDK5 substrate motif;MAPKAPK2 kinase substrate motif;WW domain binding motif	+	HTP;LTP							0.859544	1.3683e-09	115.26	88.198	93.181	0.38227	8.57303	149230000	224910000	581	NaN	8.57303	D3Z0Q6;Q9Z1E4	581;645	D3Z0Q6	D3Z0Q6	Glycogen [starch] synthase, muscle	Gys1	ATQGYRYPRPASVPPSPSLSRHSSPHQSEDE	RPAsVPPsPsLsRHs
	-0.410735	S	3		___1	14-3-3 domain binding motif;b-Adrenergic Receptor kinase substrate motif;Calmodulin-dependent protein kinase II substrate motif;MAPKAPK1 kinase substrate motif;PAK2 kinase substrate motif;Pim1 kinase substrate sequence;PKA kinase substrate motif;PKA, PKG kinase substrate motif;PKC epsilon kinase substrate motif;PKC kinase substrate motif;PKG kinase substrate motif;ZIP kinase substrate motif	+	CST;HTP							1	1.98872e-45	177.32	177.32	177.32	0.87991	8.01465	39158000	64275000	1054	NaN	8.01465	O88532	1054	O88532	O88532	Zinc finger RNA-binding protein	Zfr	NQRFNIHNNRKRRRDSDGVDGFEAEGKKDKK	NRKRRRDsDGVDGFE
	-0.409182	S	2		___1	Casein kinase II substrate motif	+	CST;HTP							0.98678	5.42753e-06	91.401	85.319	91.401	0.28802	7.25108	8096400	9730700	1535	NaN	7.25108	A2A5R2	1535	A2A5R2	A2A5R2	Brefeldin A-inhibited guanine nucleotide-exchange protein 2	Arfgef2	SSIDRNASERGQSQLSNPTDDSWKGAPYAHQ	ERGQsQLsNPTDDSW
	-0.408742	S	2		___1	AMP-activated protein kinase substrate motif;Casein kinase II substrate motif;Pyruvate dehydrogenase kinase substrate motif	+	HTP							1	2.05173e-69	188.07	185.5	179.06	-0.95625	9.33391	1275300000	882040000	43	NaN	9.33391	D3Z5T2;Q9D0L7	43;43	D3Z5T2	D3Z5T2	Armadillo repeat-containing protein 10	Armc10	TRGPRRGGRRLRPSRSAEDLTDGSYDDILNA	RRLRPsRsAEDLtDG
	-0.407823	S	2		___1	Casein kinase II substrate motif;ERK1,2 kinase substrate motif;GSK-3, ERK1, ERK2, CDK5 substrate motif;WW domain binding motif	+	HTP							0.998404	3.35156e-09	121.45	102.17	115.83	-0.0028229	9.14323	594730000	795930000	149	NaN	9.14323	B2RUP2-2;B2RUP2	149;149	B2RUP2-2	B2RUP2-2	Protein unc-13 homolog D	Unc13d	YCLLGIEQKVGVAEGSPVSRRRQKAVVKHTI	KVGVAEGsPVsRRRQ
	-0.406694	S	2		___1	BARD1 BRCT domain binding motif;Casein kinase I substrate motif;Casein kinase II substrate motif	+	HTP							1	5.54052e-29	162	162	110.04	-0.17671	8.92726	357570000	488210000	15	NaN	8.92726	P70452;D6RJ29	15;15	P70452	P70452	Syntaxin-4	Stx4;Stx4a	_MRDRTHELRQGDNISDDEDEVRVALVVHSG	LRQGDNIsDDEDEVR
	-0.406618	S	2		___1	14-3-3 domain binding motif;Calmodulin-dependent protein kinase II substrate motif;Calmodulin-dependent protein kinase IV substrate motif;Chk1 kinase substrate motif;ERK1,2 kinase substrate motif;G protein-coupled receptor kinase 1 substrate motif;GSK3 kinase substrate motif;GSK-3, ERK1, ERK2, CDK5 substrate motif;MDC1 BRCT domain binding motif;PKA kinase substrate motif;PKC kinase substrate moti…	+	HTP							0.913453	0.00669085	61.495	43.316	61.495	1.2022	7.74595	21894000	33818000	40	NaN	7.74595	F7AR27;F6ZXW2;F6S0H0;D3YXS7;E9PYD1	40;37;126;129;129	F7AR27	F7AR27		Fam98c	LQAARLLHLRLQRDSSPVPSFGEGTKKANGV	LRLQRDSsPVPsFGE
	-0.406618	S	3		___1	DNA dependent Protein kinase substrate motif	+	HTP							1	1.08604e-21	112.8	110.51	49.825	-0.51086	8.20593	62996000	97677000	111	NaN	8.20593	Q8JZQ9	111	Q8JZQ9	Q8JZQ9	Eukaryotic translation initiation factor 3 subunit B	Eif3b	PGKAEAVGEQARGHPSAGAEEEGGSDGSAAE	EQARGHPsAGAEEEG
	-0.406197	S	2		___2	ATM kinase substrate motif;DNA dependent Protein kinase substrate motif;G protein-coupled receptor kinase 1 substrate motif;GSK3 kinase substrate motif	+	CST;HTP							0.911558	0.00111466	48.907	45.19	48.907	0.1449	7.49212	16674000	14380000	531	NaN	7.49212	Q8BRT1;E9Q8N5;Q08EB6;F7DCH5	531;531;531;531	Q8BRT1	Q8BRT1	CLIP-associating protein 2	Clasp2	RLSVARSSRIPRPSVSQGCSREASRESSRDT	RIPRPsVsQGCsREA
	-0.406197	S	2		___2	Casein kinase II substrate motif;G protein-coupled receptor kinase 1 substrate motif;GSK3 kinase substrate motif;MAPKAPK2 kinase substrate motif	+	CST;HTP							0.999686	2.66693e-06	84.508	84.508	48.907	0.1449	8.48544	127280000	178520000	535	NaN	8.48544	Q8BRT1;E9Q8N5;Q08EB6;F7DCH5	535;535;535;535	Q8BRT1	Q8BRT1	CLIP-associating protein 2	Clasp2	ARSSRIPRPSVSQGCSREASRESSRDTSPVR	PsVsQGCsREAsRES
	-0.405872	T	2		___1	Casein kinase II substrate motif;GSK-3, ERK1, ERK2, CDK5 substrate motif;PKA kinase substrate motif;RAF1 kinase substrate motif;WW domain binding motif	+	HTP							0.995009	0.0033408	75.941	23.45	75.941	-1.2892	7.88046	29187000	46752000	499	NaN	7.88046	Q7TQH0-3;Q7TQH0;Q7TQH0-2;Q3TGG2;E9Q5Q0	499;505;499;419;385	Q7TQH0-3	Q7TQH0-3	Ataxin-2-like protein	Atxn2l	PGAGSISPASPKLSLTPTDVKELPTKEPSRN	AsPKLsLtPtDVKEL
	-0.405222	S	2		___1	b-Adrenergic Receptor kinase substrate motif;G protein-coupled receptor kinase 1 substrate motif	+	HTP							0.998101	1.3865e-21	126.32	118.88	126.32	-0.15877	8.23757	65957000	106860000	95	NaN	8.23757	Q9CQU3	95	Q9CQU3	Q9CQU3	Protein RER1	Rer1	IAFLSPKVDPSLMEDSDDGPSLPTKQNEEFR	DPsLMEDsDDGPSLP
	-0.404859	S	3		___2	ERK1,2 kinase substrate motif;GSK-3, ERK1, ERK2, CDK5 substrate motif;WW domain binding motif	+	HTP							0.999977	4.17158e-06	48.286	45.595	48.286	1.0652	8.36453	98370000	133120000	7	NaN	8.36453	Q9WVH4;H9KUZ0	7;7	Q9WVH4	Q9WVH4	Forkhead box protein O3	Foxo3	_________MAEAPASPVPLSPLEVELDPEF	_MAEAPAsPVPLsPL
	-0.404859	S	3		___2	Casein kinase II substrate motif;ERK1,2 kinase substrate motif;GSK-3, ERK1, ERK2, CDK5 substrate motif;WW domain binding motif	+	HTP							0.999961	6.83039e-06	48.286	45.595	48.286	1.0652	8.1954	62277000	94542000	12	NaN	8.1954	Q9WVH4;H9KUZ0	12;12	Q9WVH4	Q9WVH4	Forkhead box protein O3	Foxo3	____MAEAPASPVPLSPLEVELDPEFEPQSR	PAsPVPLsPLEVELD
	-0.404363	S	2		___1	14-3-3 domain binding motif;Calmodulin-dependent protein kinase II substrate motif;Calmodulin-dependent protein kinase IV substrate motif;Casein kinase II substrate motif;G protein-coupled receptor kinase 1 substrate motif;PKA kinase substrate motif;PKC kinase substrate motif;ZIP kinase substrate motif									0.968711	0.0101007	88.803	70.541	88.803	-0.030399	7.26491	9049700	9354400	634	NaN	7.26491	Q69ZW3-2;Q69ZW3	634;659	Q69ZW3-2	Q69ZW3-2	EH domain-binding protein 1	Ehbp1	HLSPSTASPYYRRTKSDTEPQKSQQSSARTS
	-0.403446	S	3		___3	b-Adrenergic Receptor kinase substrate motif;Casein kinase I substrate motif;Casein kinase II substrate motif;G protein-coupled receptor kinase 1 substrate motif;GSK3 kinase substrate motif;Pyruvate dehydrogenase kinase substrate motif	+	CST;HTP							1	1.09972e-27	113.32	113.32	59.446	0.026552	8.34531	93865000	127610000	79	NaN	8.34531	O09130	79	O09130	O09130	NFATC2-interacting protein	Nfatc2ip	VPVARLPAPAKPEQDSDSDSEGAAEGPAGAP	PAKPEQDsDsDsEGA
	-0.403446	S	3		___3	b-Adrenergic Receptor kinase substrate motif;Casein kinase I substrate motif;Casein kinase II substrate motif	+	CST;HTP							1	1.09972e-27	113.32	113.32	59.446	0.026552	8.34531	93865000	127610000	81	NaN	8.34531	O09130	81	O09130	O09130	NFATC2-interacting protein	Nfatc2ip	VARLPAPAKPEQDSDSDSEGAAEGPAGAPRT	KPEQDsDsDsEGAAE
	-0.403446	S	3		___3	b-Adrenergic Receptor kinase substrate motif;Casein kinase I substrate motif;G protein-coupled receptor kinase 1 substrate motif;MAPKAPK2 kinase substrate motif	+	CST;HTP							1	1.09972e-27	113.32	113.32	59.446	0.026552	8.34531	93865000	127610000	83	NaN	8.34531	O09130	83	O09130	O09130	NFATC2-interacting protein	Nfatc2ip	RLPAPAKPEQDSDSDSEGAAEGPAGAPRTLV	EQDsDsDsEGAAEGP
	-0.402378	S	2		___2	Casein kinase I substrate motif;Casein kinase II substrate motif;G protein-coupled receptor kinase 1 substrate motif	+	HTP							1	1.2026e-22	143.28	138.61	133.95	0.33017	9.70157	1857800000	3172200000	159	NaN	9.70157	Q00PI9	159	Q00PI9	Q00PI9	Heterogeneous nuclear ribonucleoprotein U-like protein 2	Hnrnpul2	EHDNGKGEEDGPEERSGDETPGSEAPGDKAV	EDGPEERsGDEtPGs
	-0.401501	S	3		___1	14-3-3 domain binding motif;Calmodulin-dependent protein kinase II substrate motif;MAPKAPK1 kinase substrate motif;MAPKAPK2 kinase substrate motif;p70 Ribosomal S6 kinase substrate motif;Phosphorylase kinase substrate motif;PKA kinase substrate motif;PKC kinase substrate motif	+	CST;HTP;LTP	+	intracellular localization	cell motility, altered			required for T cell trafficking to the lymph nodes; interaction with ezrin, radixin, moesin inhibits T cell migration	1	1.90575e-29	150.63	134.1	112.56	0.021953	8.90299	346320000	453490000	347	NaN	8.90299	P15702	347	P15702	P15702	Leukosialin	Spn	PTLTTFFSRRKSRQGSLVLEELKPGSGPNLK	RRKsRQGsLVLEELK	PKCT
	-0.401139	S	2		___1	Casein kinase II substrate motif;PKA kinase substrate motif;PKC kinase substrate motif;Pyruvate dehydrogenase kinase substrate motif	+	HTP							1	3.8808e-110	243.22	223.83	210.32	0.64784	9.71984	2131100000	3115100000	423	NaN	9.71984	Q80WJ7;F6QHD1;F6QFT1;F6ZSG0	423;300;307;217	Q80WJ7	Q80WJ7	Protein LYRIC	Mtdh	SLLKSQEPISNDQKVSDDDKEKGEGALPTGK	IsNDQKVsDDDKEKG
	-0.400625	S	2		___1	ERK1,2 kinase substrate motif;G protein-coupled receptor kinase 1 substrate motif;Growth associated histone HI kinase substrate motif;GSK-3, ERK1, ERK2, CDK5 substrate motif;PKA kinase substrate motif;PKC kinase substrate motif;WW domain binding motif	+	HTP							1	0.0023318	67.645	63.855	67.645	1.2377	7.72163	22668000	30010000	578	NaN	7.72163	Q6IE82;B1AV39	578;579	Q6IE82	Q6IE82	Protein Jade-3	Phf16	QLSSPGSSSPGHSKRSPQMPEEPLDMNVKIY	SPGHSKRsPQMPEEP
	-0.400625	S	2		___1	Cdc2 kinase substrate motif;CDK kinase substrate motif;CDK1,2,4,6 kinase substrate motif;ERK1,2 kinase substrate motif;G protein-coupled receptor kinase 1 substrate motif;Growth associated histone HI kinase substrate motif;GSK-3, ERK1, ERK2, CDK5 substrate motif;PKA kinase substrate motif;WW domain binding motif	+	HTP							1	0.056062	69.275	32.894	68.525	0.47562	7.47719	10840000	19165000	180	NaN	7.47719	P43275	180	P43275	P43275	Histone H1.1	Hist1h1a	SPKKPKVVKAKKVAKSPAKAKAVKPKASKAK	KAKKVAKsPAKAKAV
	-0.397638	S	3		___2	Casein kinase II substrate motif;ERK1,2 kinase substrate motif;Growth associated histone HI kinase substrate motif;GSK-3, ERK1, ERK2, CDK5 substrate motif;MDC1 BRCT domain binding motif;Pim1 kinase substrate sequence;PKA kinase substrate motif;PKC kinase substrate motif;Plk1 PBD domain binding motif;WW domain binding motif	+	CST;HTP							0.833745	1.50803e-18	116.21	113.72	116.21	0.5187	8.20311	69313000	90314000	529	NaN	8.20311	Q9D6Z1;A2APD7	529;245	Q9D6Z1	Q9D6Z1	Nucleolar protein 56	Nop56	DLEEMATSSAKRKKSSPKEEVASEPEEAASP	sAKRKKssPKEEVAs
	-0.397087	S	4		___1	b-Adrenergic Receptor kinase substrate motif;BARD1 BRCT domain binding motif;Casein kinase I substrate motif;Casein kinase II substrate motif;PKA kinase substrate motif	+	HTP							0.99573	2.69332e-45	137.66	132.59	137.66	0.38684	7.84189	18530000	50955000	2920	NaN	7.84189	E9Q6J5	2920	E9Q6J5	E9Q6J5		Bod1l	QKSVSETSEDKKDEESDEEEEEEEEEEPLGA	EDKKDEEsDEEEEEE
	-0.395777	S	2		___1	Casein kinase II substrate motif;ERK1,2 kinase substrate motif;GSK-3, ERK1, ERK2, CDK5 substrate motif;WW domain binding motif	+	CST;HTP							0.995003	1.36526e-29	150.69	150.69	136.68	0.27191	8.72314	202680000	325940000	460	NaN	8.72314	Q6NXI6-2;Q6NXI6	460;504	Q6NXI6-2	Q6NXI6-2	Regulation of nuclear pre-mRNA domain-containing protein 2	Rprd2	TGVSSASRPSPGIPTSPSNLSSGLKTPAPAT	PsPGIPtsPsNLssG
	-0.395758	S	2		___1	14-3-3 domain binding motif;Calmodulin-dependent protein kinase II substrate motif;MAPKAPK2 kinase substrate motif;Phosphorylase kinase substrate motif;PKA kinase substrate motif;PKC kinase substrate motif	+	HTP							1	0.0198305	63.624	30.625	63.624	0.84424	7.21927	6074000	10494000	424	NaN	7.21927	Q3V3Q7;E9Q7E9	424;454	Q3V3Q7	Q3V3Q7	Phosphofurin acidic cluster sorting protein 2	Pacs2	LKERQPARPQNERANSLDNERCPDTRSQLQI	PQNERANsLDNERCP
	-0.394866	S	3		___1	Casein kinase II substrate motif;Plk1 kinase substrate motif;Pyruvate dehydrogenase kinase substrate motif	+	HTP							0.999984	1.44603e-13	112.34	99.82	112.34	-0.2053	8.07103	47104000	70669000	159	NaN	8.07103	Q9JL26-2;A2AB60;Q9JL26	159;184;184	Q9JL26-2	Q9JL26-2	Formin-like protein 1	Fmnl1	DSVASGAEKSKPLDQSVEDLSKAPPSSVPKS	KSKPLDQsVEDLsKA
	-0.394866	S	3		___1	ERK1,2 kinase substrate motif;Growth associated histone HI kinase substrate motif;GSK-3, ERK1, ERK2, CDK5 substrate motif;PKA kinase substrate motif;PKC kinase substrate motif;WW domain binding motif	+	HTP							0.998802	4.8895e-22	133.41	120.74	98.3	0.95533	8.00492	44072000	57065000	103	NaN	8.00492	Q76LS9-2;Q76LS9	103;103	Q76LS9-2	Q76LS9-2	Protein FAM63A	Fam63a	VETAEVCSRPQELPQSPRIQQPELDFYCVKW	RPQELPQsPRIQQPE
	-0.394544	S	3		___1	Casein kinase II substrate motif;DNA dependent Protein kinase substrate motif;ERK1,2 kinase substrate motif;GSK-3, ERK1, ERK2, CDK5 substrate motif;WW domain binding motif	+	HTP							0.998324	1.89797e-08	75.868	75.868	75.868	0.064918	7.65443	17455000	27670000	25	NaN	7.65443	Q8BZR9;Q8BZR9-2;Q8BZR9-3	25;25;25	Q8BZR9	Q8BZR9	Uncharacterized protein C17orf85 homolog		SVKAEAPAGPALGLPSPEVESGLERGEPEPM	GPALGLPsPEVEsGL
	-0.394373	S	2		___1	14-3-3 domain binding motif;Akt kinase substrate motif;Calmodulin-dependent protein kinase II substrate motif;Casein kinase II substrate motif;G protein-coupled receptor kinase 1 substrate motif;GSK3 kinase substrate motif;MAPKAPK1 kinase substrate motif;MDC1 BRCT domain binding motif;p70 Ribosomal S6 kinase substrate motif;Phosphorylase kinase substrate motif;PKA kinase substrate motif;PKC kinas…	+	CST;HTP;LTP							0.999987	4.56647e-20	167.2	133.33	167.2	0.18432	9.1536	593420000	830910000	58	NaN	9.1536	Q9CT10	58	Q9CT10	Q9CT10	Ran-binding protein 3	Ranbp3	EDGNYCPPVKRERTSSLTHSEEKSSGFRLKP	VKRERtssLtHSEEK	ERK1
	-0.394126	S	3		___3	Casein kinase I substrate motif;ERK1,2 kinase substrate motif;G protein-coupled receptor kinase 1 substrate motif;GSK3 kinase substrate motif;GSK-3, ERK1, ERK2, CDK5 substrate motif;WW domain binding motif	+	HTP							0.829011	1.3468e-05	50.35	48.682	50.35	0.75364	7.34786	5691500	16585000	110	NaN	7.34786	O54916-3;O54916-4;F6R6F1;E9Q632;O54916;D3Z2E3;D6RIN6	110;110;149;162;162;162;162	O54916-3	O54916-3	RalBP1-associated Eps domain-containing protein 1	Reps1	DAVQPRPSAEQQEPVSPVVSPQQSPPTSPHT	AEQQEPVsPVVsPQQ
	-0.394126	S	3		___3	ERK1,2 kinase substrate motif;G protein-coupled receptor kinase 1 substrate motif;GSK3 kinase substrate motif;GSK-3, ERK1, ERK2, CDK5 substrate motif;MAPKAPK2 kinase substrate motif;WW domain binding motif	+	HTP							0.971372	1.3468e-05	50.35	48.682	50.35	0.75364	7.34786	5691500	16585000	114	NaN	7.34786	O54916-3;O54916-4;F6R6F1;E9Q632;O54916;D3Z2E3;D6RIN6	114;114;153;166;166;166;166	O54916-3	O54916-3	RalBP1-associated Eps domain-containing protein 1	Reps1	PRPSAEQQEPVSPVVSPQQSPPTSPHTWRKH	EPVsPVVsPQQsPPT
	-0.394126	S	3		___3	Casein kinase II substrate motif;ERK1,2 kinase substrate motif;G protein-coupled receptor kinase 1 substrate motif;GSK3 kinase substrate motif;GSK-3, ERK1, ERK2, CDK5 substrate motif;MAPKAPK2 kinase substrate motif;WW domain binding motif	+	HTP							0.971734	1.3468e-05	50.35	48.682	50.35	0.75364	7.34786	5691500	16585000	118	NaN	7.34786	O54916-3;O54916-4;F6R6F1;E9Q632;O54916;D3Z2E3;D6RIN6	118;118;157;170;170;170;170	O54916-3	O54916-3	RalBP1-associated Eps domain-containing protein 1	Reps1	AEQQEPVSPVVSPQQSPPTSPHTWRKHSRHP	PVVsPQQsPPTSPHT
	-0.393937	S	2		___1	14-3-3 domain binding motif;AMP-activated protein kinase substrate motif;b-Adrenergic Receptor kinase substrate motif;Calmodulin-dependent protein kinase I substrate motif;Calmodulin-dependent protein kinase II alpha substrate motif;Calmodulin-dependent protein kinase II substrate motif;Calmodulin-dependent protein kinase IV substrate motif;Chk1 kinase substrate motif;HMGCoA Reductase kinase subs…	+	CST;HTP							0.999963	0.000484751	54.582	50.828	54.582	-0.13844	8.07533	48142000	70798000	411	NaN	8.07533	Q7TQ95	411	Q7TQ95	Q7TQ95	Protein lunapark	Lnp	ETSTNEAKSPVLRADSVPNLEPSEESLVTK_	sPVLRADsVPNLEPs
	-0.392516	S	2		___1	14-3-3 domain binding motif;Akt kinase substrate motif;Calmodulin-dependent protein kinase II substrate motif;G protein-coupled receptor kinase 1 substrate motif;MAPKAPK1 kinase substrate motif;MAPKAPK2 kinase substrate motif;PKA kinase substrate motif;PKC epsilon kinase substrate motif;PKC kinase substrate motif	+	HTP							0.998627	0.0777307	42.425	30.189	42.425	0.78685	7.23472	9069000	8098600	554	NaN	7.23472	Q8K285	554	Q8K285	Q8K285	FCH domain only protein 1	Fcho1	EGLAATLRRPRSRKVSCPLTRSNGDLCRSLS	RPRSRKVsCPLTRSN
	-0.392137	S	3		___1	14-3-3 domain binding motif;Aurora-A kinase substrate motif;Calmodulin-dependent protein kinase II substrate motif;Casein kinase II substrate motif;G protein-coupled receptor kinase 1 substrate motif;GSK3 kinase substrate motif;PAK2 kinase substrate motif;Phosphorylase kinase substrate motif;PKA kinase substrate motif;PKC epsilon kinase substrate motif;PKC kinase substrate motif	+	HTP							0.989139	1.51825e-08	107.39	97.037	107.39	1.5457	7.72434	19339000	33668000	199	NaN	7.72434	Q9Z248-2;Q9Z248;F8WGQ1	199;199;22	Q9Z248-2	Q9Z248-2	Zinc finger protein AEBP2	Aebp2	TGGGGSSATSGGRRGSLEMSSDGEPLSRMDS	TSGGRRGsLEMssDG
	-0.389262	S	2		___1	Casein kinase II substrate motif;Pyruvate dehydrogenase kinase substrate motif	+	CST;HTP							1	0.00668928	82.261	61.473	44.639	0.6211	8.91938	330860000	499730000	198	NaN	8.91938	Q5XJE5;Q5XJE5-2	198;198	Q5XJE5	Q5XJE5	RNA polymerase-associated protein LEO1	Leo1	EEKMQNTDDEDRAQISDDDRQQLSEEEKGNS	DEDRAQIsDDDRQQL
	-0.388488	S	3		___1	Casein kinase I substrate motif;Casein kinase II substrate motif;PKA kinase substrate motif	+	HTP							1	2.3916e-15	119.38	112.53	75.868	-0.57782	7.73414	22197000	32020000	386	NaN	7.73414	Q9JI13-2;Q9JI13	386;386	Q9JI13-2	Q9JI13-2	Something about silencing protein 10	Utp3	EMEDRQELKRKKEENSAEEQALEEQNAKRAI	KRKKEENsAEEQALE
	-0.387846	S	2		___2	Casein kinase II substrate motif;ERK1,2 kinase substrate motif;G protein-coupled receptor kinase 1 substrate motif;GSK3 kinase substrate motif;GSK-3, ERK1, ERK2, CDK5 substrate motif;MDC1 BRCT domain binding motif;PKA kinase substrate motif;Plk1 PBD domain binding motif;WW domain binding motif									0.946901	2.28303e-18	89.391	89.391	61.235	0.50939	9.0739	485290000	700210000	560	NaN	9.0739	E9Q740;F8VQC1	560;621	E9Q740	E9Q740	Signal recognition particle subunit SRP72	Srp72	TAGASSELDASKAVSSPPTSPRPGSAATISS
	-0.387242	S	3		___1	Casein kinase II substrate motif;ERK1,2 kinase substrate motif;Growth associated histone HI kinase substrate motif;GSK-3, ERK1, ERK2, CDK5 substrate motif;WW domain binding motif	+	HTP							1	1.12279e-21	134.86	124.24	134.86	2.6798	8.46808	110070000	183750000	195	NaN	8.46808	Q8CB77	195	Q8CB77	Q8CB77	Transcription elongation factor B polypeptide 3	Tceb3	PPPSSPHQMYTDLSRSPEEDQEPIISHQKPG	MYTDLSRsPEEDQEP
	-0.387185	S	3		___1	ERK1,2 kinase substrate motif;GSK-3, ERK1, ERK2, CDK5 substrate motif;MDC1 BRCT domain binding motif;Plk1 PBD domain binding motif;WW domain binding motif									0.810299	9.01764e-13	88.688	82.982	88.688	-0.013236	8.24886	76692000	100670000	159	NaN	8.24886	E9Q2B2;Q5RIM6;E9Q8K6;Q5RIN0;Q8BK32	159;159;159;159;159	E9Q2B2;Q5RIM6	E9Q2B2		Ncor1	AKKDSAFGSKHEAPSSPLAGQPCGDDQNASP
	-0.38579	T	3		___1	Growth associated histone HI kinase substrate motif;GSK-3, ERK1, ERK2, CDK5 substrate motif;PKA kinase substrate motif;PKC kinase substrate motif;WW domain binding motif	+	HTP							1	0.0150821	52.167	34.936	42.336	-0.14048	7.63662	19588000	23725000	96	NaN	7.63662	P62855	96	P62855	P62855	40S ribosomal protein S26	Rps26	SKVVRNRSREARKDRTPPPRFRPAGAAPRPP	REARKDRtPPPRFRP
	-0.384621	S	2		___1	14-3-3 domain binding motif;ATM kinase substrate motif;Calmodulin-dependent protein kinase II substrate motif;Casein kinase II substrate motif;DNA dependent Protein kinase substrate motif;G protein-coupled receptor kinase 1 substrate motif;PKA kinase substrate motif;PKC kinase substrate motif	+	CST;HTP							0.790558	0.0290182	47.062	20.1	47.062	0.11132	7.3476	11393000	10871000	217	NaN	7.3476	Q8CBW3-5;B7ZCU2;B7ZCU5;Q8CBW3-2;B7ZCU4;B7ZCU3;Q8CBW3-4;Q8CBW3-3;B7ZCU0;Q8CBW3;J3QNK8	217;222;222;217;222;222;217;217;222;222;222	Q8CBW3-5	Q8CBW3-5	Abl interactor 1	Abi1	PTVPNDYMTSPARLGSQHSPGRTASLNQRPR	tsPARLGsQHsPGRt
	-0.384169	S	2		___1	14-3-3 domain binding motif;Calmodulin-dependent protein kinase II substrate motif;Casein kinase II substrate motif;PKA kinase substrate motif;PKC kinase substrate motif	+	CST;HTP							0.999973	3.35197e-09	119.74	79.247	107.09	0.36415	9.14151	573780000	811440000	1142	NaN	9.14151	E9PVC6;Q6NZJ6-2;E9Q9E1;E9PVC5;Q6NZJ6	1142;1175;1182;1183;1189	E9PVC6	E9PVC6	Eukaryotic translation initiation factor 4 gamma 1	Eif4g1	DRLDRARTPATKRSFSKEVEERSRERPSQPE	PAtKRsFsKEVEERs
	-0.383247	S	3		___1	ERK1,2 kinase substrate motif;G protein-coupled receptor kinase 1 substrate motif;GSK3 kinase substrate motif;GSK-3, ERK1, ERK2, CDK5 substrate motif;WW domain binding motif	+	CST;HTP							0.999993	3.47844e-116	228.33	228.33	228.33	0.52661	9.44478	1169500000	1615100000	200	NaN	9.44478	P51125-3;P51125-2;P51125;P51125-7;Q8CE80;P51125-6	200;200;219;136;185;204	P51125-3	P51125-3	Calpastatin	Cast	KVVGKKKEQKPFTPASPVQSTPSKPSDKSGM	QKPFtPAsPVQStPs
	-0.383078	S	2		___1	DNA dependent Protein kinase substrate motif;ERK1,2 kinase substrate motif;Growth associated histone HI kinase substrate motif;GSK-3, ERK1, ERK2, CDK5 substrate motif;PKA kinase substrate motif;PKC kinase substrate motif;WW domain binding motif	+	HTP							0.999893	1.97875e-06	116.9	95.53	116.9	-0.39347	8.31521	98631000	108010000	527	NaN	8.31521	Q6P9Q4	527	Q6P9Q4	Q6P9Q4	FH1/FH2 domain-containing protein 1	Fhod1	QRSLEPEPKKPVSPPSPKAEPIQEPPTCVPK	KKPVsPPsPKAEPIQ
	-0.382965	S	2		___1	14-3-3 domain binding motif;Calmodulin-dependent protein kinase II substrate motif;Casein kinase II substrate motif;G protein-coupled receptor kinase 1 substrate motif;MAPKAPK1 kinase substrate motif;PAK2 kinase substrate motif;Pim1 kinase substrate sequence;PKA kinase substrate motif;PKC epsilon kinase substrate motif;PKC kinase substrate motif;Pyruvate dehydrogenase kinase substrate motif	+	CST;HTP							1	0.00496001	60.064	19.997	51.762	0.12315	9.03894	455540000	638280000	13	NaN	9.03894	Q02053	13	Q02053	Q02053	Ubiquitin-like modifier-activating enzyme 1	Uba1	___MSSSPLSKKRRVSGPDPKPGSNCSPAQS	LSKKRRVsGPDPKPG
	-0.382551	S	2		___1	Casein kinase II substrate motif;ERK1,2 kinase substrate motif;GSK-3, ERK1, ERK2, CDK5 substrate motif;WW domain binding motif	+	HTP							0.853601	0.0112484	62.528	31.916	62.528	0.72274	7.23935	7993400	9358900	408	NaN	7.23935	E9Q7S1;R4GML0;O88466;O88466-2;O88466-3	408;431;431;431;431	E9Q7S1	E9Q7S1	Zinc finger protein 106	Zfp106;Znf106	SNPPVIKTQKAGPPGSPSHKAISDGTAFCEV	QKAGPPGsPSHKAIS
	-0.382043	S	2		___2	14-3-3 domain binding motif;Calmodulin-dependent protein kinase II substrate motif;Casein kinase II substrate motif;PKA kinase substrate motif;PKC kinase substrate motif	+	CST;HTP							1	6.14716e-10	110.77	105.41	103.6	-1.2587	7.91329	29160000	52741000	628	NaN	7.91329	Q3UMU9;Q3UMU9-3	628;637	Q3UMU9	Q3UMU9	Hepatoma-derived growth factor-related protein 2	Hdgfrp2	AQEDGQDSEDGPRGGSSEELHDSPRDNSDPA	EDGPRGGssEELHDs
	-0.380841	S	3		___1	Casein kinase I substrate motif;ERK1,2 kinase substrate motif;GSK-3, ERK1, ERK2, CDK5 substrate motif;WW domain binding motif	+	HTP							0.985189	4.35725e-13	71.098	70.104	71.098	1.2348	7.76949	22594000	36222000	1585	NaN	7.76949	Q3UH06-2;Q3UH06;Q3UH06-3;F6UB40	1585;1667;1721;287	Q3UH06-2	Q3UH06-2	Ras-responsive element-binding protein 1	Rreb1	SAPKEQASPGETDPQSPAAIVQDLLELCGKR	PGETDPQsPAAIVQD
	-0.380371	S	2		___1	Casein kinase II substrate motif;ERK1,2 kinase substrate motif;GSK-3, ERK1, ERK2, CDK5 substrate motif;MDC1 BRCT domain binding motif;Plk1 PBD domain binding motif;WW domain binding motif	+	HTP							0.811725	2.08051e-07	97.45	87.024	97.45	0.26334	7.54689	17018000	18210000	853	NaN	7.54689	Q3UR70	853	Q3UR70	Q3UR70	Transforming growth factor-beta receptor-associated protein 1	Tgfbrap1	LVHTHCAASRHTAPSSPSPGTRT________	SRHTAPSsPsPGtRT
	-0.380127	S	2		___1	ATM kinase substrate motif;Casein kinase II substrate motif;DNA dependent Protein kinase substrate motif	+	HTP							0.999287	1.28287e-05	102.03	76.58	102.03	-0.035042	8.51457	134760000	192260000	2097	NaN	8.51457	Q8C147	2097	Q8C147	Q8C147	Dedicator of cytokinesis protein 8	Dock8	DSFHRSSFRKCETQLSQGS____________	RKCETQLsQGS____
	-0.379902	S	2		___1	14-3-3 domain binding motif;Calmodulin-dependent protein kinase II substrate motif;ERK1,2 kinase substrate motif;GSK-3, ERK1, ERK2, CDK5 substrate motif;MAPKAPK2 kinase substrate motif;PKA kinase substrate motif;PKC kinase substrate motif;WW domain binding motif	+	HTP;LTP							1	3.51763e-05	104.26	73.186	91.62	-0.57003	9.50983	1387100000	1847700000	540	NaN	9.50983	Q8CHW4	540	Q8CHW4	Q8CHW4	Translation initiation factor eIF-2B subunit epsilon	Eif2b5	SEGSVDPEELDSRAGSPQLDDIRVFQNEVLG	ELDsRAGsPQLDDIR
	-0.379695	S	3		___1	ATM kinase substrate motif;Casein kinase II substrate motif;DNA dependent Protein kinase substrate motif;G protein-coupled receptor kinase 1 substrate motif;PKA kinase substrate motif;PKC kinase substrate motif	+	HTP							0.761729	6.75803e-11	108.08	96.155	108.08	-1.3207	8.09985	54985000	70864000	739	NaN	8.09985	E9Q1U8;Q64127-2;Q64127	739;775;809	E9Q1U8	E9Q1U8	Transcription intermediary factor 1-alpha	Trim24	HQENSSNGKSEWSDASQKSPVHVGETRKEDD	KSEWSDAsQKsPVHV
	-0.379263	S	2		___1	Casein kinase II substrate motif;ERK1,2 kinase substrate motif;Growth associated histone HI kinase substrate motif;GSK-3, ERK1, ERK2, CDK5 substrate motif;PKA kinase substrate motif;PKC kinase substrate motif;WW domain binding motif	+	CST;HTP							0.99917	0.000387383	99.283	24.363	78.513	0.62285	8.44137	141650000	134630000	533	NaN	8.44137	A2AU91;A2AU89;P70399;A2AU90;P70399-3	533;533;527;533;527	A2AU91	A2AU91	Tumor suppressor p53-binding protein 1	Trp53bp1;Tp53bp1	STSEYSQSSKMESLGSPRTEEDRENTQIDDT	SKMEsLGsPRtEEDR
	-0.378082	S	3		___1	ERK1,2 kinase substrate motif;G protein-coupled receptor kinase 1 substrate motif;GSK3 kinase substrate motif;GSK-3, ERK1, ERK2, CDK5 substrate motif;WW domain binding motif	+	HTP							0.991942	1.09877e-05	61.985	56.855	61.985	0.064895	8.11534	58798000	71619000	434	NaN	8.11534	Q8R3Y8-2;Q8R3Y8	434;453	Q8R3Y8-2	Q8R3Y8-2	Interferon regulatory factor 2-binding protein 1	Irf2bp1	KDPGGGGGSVRAGGASPAASSTTQPPAQHRL	SVRAGGAsPAAsSTT
	-0.378044	S	3		___1	PKA kinase substrate motif	+	HTP							1	0.000339263	56.514	42.43	56.514	-0.14895	7.47705	9695400	20299000	93	NaN	7.47705	O54916-3;O54916-4;F6R6F1;E9Q632;O54916;D3Z2E3;D6RIN6	93;93;132;145;145;145;145	O54916-3	O54916-3	RalBP1-associated Eps domain-containing protein 1	Reps1	IPPPPGRGQVKKGPGSHDAVQPRPSAEQQEP	QVKKGPGsHDAVQPR
	-0.377519	S	2		___1	Casein kinase II substrate motif;G protein-coupled receptor kinase 1 substrate motif;Pyruvate dehydrogenase kinase substrate motif	+	HTP							0.998021	2.79222e-51	172.3	172.3	165.06	0.45655	8.58143	129300000	252140000	107	NaN	8.58143	G3UWX1;G3X8Z6;Q5U4B1;P35601-2;P35601;G3UXL4	107;107;107;107;107;107	G3UWX1	G3UWX1	Replication factor C subunit 1	Rfc1	YKPGKVSQKDPVTYVSETDEDDDFVCKKAAS	KDPVtYVsEtDEDDD
	-0.377501	S	2		___2	MDC1 BRCT domain binding motif;Plk1 PBD domain binding motif	+	CST;HTP							0.974387	1.13532e-07	117.55	109.45	117.55	2.1306	8.41133	125310000	132520000	300	NaN	8.41133	Z4YMB8;Q58A65-6;Q58A65-3;F8WH31;E9PUD1;Q58A65-4;Q58A65-5;Q58A65-2;Q58A65;F6SH61;F6WNT4	300;554;580;581;581;576;719;719;733;569;369	Z4YMB8	Z4YMB8	C-Jun-amino-terminal kinase-interacting protein 4	Spag9	GLDTEGSKQRSASQSSLDKLDQELKEQQKEF	QRsAsQssLDKLDQE
	-0.377482	S	2		___1	Casein kinase II substrate motif;DNA dependent Protein kinase substrate motif	+	HTP							0.85514	1.44092e-10	97.057	89.133	97.057	0.92414	8.37709	87226000	151050000	679	NaN	8.37709	Q3TZZ7;Q3TZZ7-2	679;192	Q3TZZ7	Q3TZZ7	Extended synaptotagmin-2	Esyt2	LLASPSHIAAKEPTPSIASDISLPIATQELR	AAKEPtPsIAsDIsL
	-0.375721	T	2		___1	GSK-3, ERK1, ERK2, CDK5 substrate motif;WW domain binding motif	+	HTP							0.999862	2.26768e-27	160.47	150.93	127.91	0.46166	8.59249	131630000	259650000	431	NaN	8.59249	P51125-3;P51125-2;P51125;P51125-7;Q8CE80;P51125-6;P51125-5;P51125-4	431;460;479;396;445;464;122;137	P51125-3	P51125-3	Calpastatin	Cast	KPSTPAEKKSNDTSQTPPGETVPRASMCSIR	ksNDtSQtPPGETVP
	-0.374131	S	2		___1	Casein kinase I substrate motif;DNA dependent Protein kinase substrate motif;ERK1,2 kinase substrate motif;GSK-3, ERK1, ERK2, CDK5 substrate motif;WW domain binding motif	+	HTP							0.999999	1.3662e-09	100.43	92.816	100.43	0.65248	8.87914	457620000	299460000	9	NaN	8.87914	Q3UIR3;Q3UIR3-2	9;9	Q3UIR3	Q3UIR3	E3 ubiquitin-protein ligase DTX3L	Dtx3l	_______MASSPDPPSPLLVRLRESIPKAHR	ASsPDPPsPLLVRLR
	-0.373944	S	3		___1	Casein kinase II substrate motif;ERK1,2 kinase substrate motif;GSK-3, ERK1, ERK2, CDK5 substrate motif;WW domain binding motif	+	CST;HTP							1	3.61589e-99	217.29	217.29	217.29	0.017843	9.36996	917020000	1427000000	1269	NaN	9.36996	Q8BTI8;Q8BTI8-2;Q8BTI8-3	1269;1173;1269	Q8BTI8	Q8BTI8	Serine/arginine repetitive matrix protein 2	Srrm2	AETPAVASCWSGPQVSPEHKELSHSPPRENS	CWsGPQVsPEHKELs
	-0.37372	S	3		___1	Akt kinase substrate motif;b-Adrenergic Receptor kinase substrate motif;Casein kinase II substrate motif;ERK1,2 kinase substrate motif;G protein-coupled receptor kinase 1 substrate motif;GSK3 kinase substrate motif;GSK-3, ERK1, ERK2, CDK5 substrate motif;PKA kinase substrate motif;PKC kinase substrate motif;WW domain binding motif	+	HTP							0.779597	8.58011e-13	121.01	113.8	121.01	-0.72768	7.63102	14198000	28560000	1516	NaN	7.63102	B1AZI6;Q8C690;F6W2C7;B8A4C2;F6VK25	1516;154;10;33;39	B1AZI6	B1AZI6	THO complex subunit 2	Thoc2	KEENGTMGVSKHKSESPCESQYPNEKDKEKN	VSKHKSEsPCESQYP
	-0.37357	S	3		___1	Casein kinase II substrate motif;G protein-coupled receptor kinase 1 substrate motif	+	CST;HTP							0.969835	4.48239e-44	140.27	140.27	138.8	0.28131	8.85481	261380000	454450000	169	NaN	8.85481	H3BL37;O08784;Q05CS0;H3BIX0	169;169;169;169	H3BL37	H3BL37	Treacle protein	Tcof1	SPKKSAEPLANTVLASETEEEGNAQALGPTA	LANtVLAsEtEEEGN
	-0.373421	S	3		___1	ATM kinase substrate motif;Casein kinase II substrate motif;DNA dependent Protein kinase substrate motif;MAPKAPK2 kinase substrate motif;PKA kinase substrate motif;PKC kinase substrate motif	+	CST;HTP							0.999966	1.71163e-37	166.29	154.09	154.34	0.9023	7.99161	39668000	58418000	85	NaN	7.99161	Q02819;D3Z1N1;D3Z7D7	85;85;85	Q02819	Q02819	Nucleobindin-1	Nucb1	KLQAANAEDIKSGKLSQELDFVSHNVRTKLD	DIKsGKLsQELDFVS
	-0.372262	S	2		___2	14-3-3 domain binding motif;Calmodulin-dependent protein kinase II substrate motif;Casein kinase II substrate motif;G protein-coupled receptor kinase 1 substrate motif;GSK3 kinase substrate motif;Phosphorylase kinase substrate motif;PKA kinase substrate motif;PKC epsilon kinase substrate motif;PKC kinase substrate motif	+	HTP							0.995758	0.00295022	54.157	31.138	53.869	0.8016	8.17502	65155000	84475000	698	NaN	8.17502	O35691;Q3TUQ5	698;699	O35691	O35691	Pinin	Pnn	RKGSKDKSSRPDRKRSISESSRSGKRSSRSE	SRPDRKRsIsEssRS
	-0.372262	S	2		___2	14-3-3 domain binding motif;Akt kinase substrate motif;AMP-activated protein kinase 2 substrate motif;Calmodulin-dependent protein kinase II substrate motif;Casein kinase II substrate motif;G protein-coupled receptor kinase 1 substrate motif;MAPKAPK1 kinase substrate motif;PKA kinase substrate motif;PKC kinase substrate motif	+	CST;HTP							0.962089	0.00295022	78.516	76.1	49.149	0.62313	8.27156	79177000	107700000	700	NaN	8.27156	O35691;Q3TUQ5	700;701	O35691	O35691	Pinin	Pnn	GSKDKSSRPDRKRSISESSRSGKRSSRSERD	PDRKRsIsEssRSGK
	-0.370956	S	3		___2	Casein kinase II substrate motif;ERK1,2 kinase substrate motif;GSK-3, ERK1, ERK2, CDK5 substrate motif;MDC1 BRCT domain binding motif;Plk1 PBD domain binding motif;WW domain binding motif	+	CST;HTP							0.957747	7.69113e-26	136.71	131.18	112.6	0.86982	8.64174	165040000	273220000	237	NaN	8.64174	Q8BR65	237	Q8BR65	Q8BR65	Sin3 histone deacetylase corepressor complex component SDS3	Suds3	TLNKLKSPKRPASPSSPEHLPATPAESPAQR	KRPAsPssPEHLPAt
	-0.369557	S	2		___1	Casein kinase II substrate motif;ERK1,2 kinase substrate motif;G protein-coupled receptor kinase 1 substrate motif;Growth associated histone HI kinase substrate motif;GSK3 kinase substrate motif;GSK-3, ERK1, ERK2, CDK5 substrate motif;PKA kinase substrate motif;PKC kinase substrate motif;WW domain binding motif	+	HTP							0.999213	0.00470655	63.624	43.486	63.624	0.32602	7.42121	10800000	15576000	572	NaN	7.42121	E9PZD2;Q3TN34	572;655	E9PZD2	E9PZD2		Micall2	VNVGNTAVFLQAGKKSPSISPRVGKTSVGSR	FLQAGKKsPsISPRV
	-0.367266	S	2		___3	14-3-3 domain binding motif;Calmodulin-dependent protein kinase II substrate motif;Calmodulin-dependent protein kinase IV substrate motif;Casein kinase II substrate motif;G protein-coupled receptor kinase 1 substrate motif;PKA kinase substrate motif;PKC kinase substrate motif	+	HTP							0.99995	0.00319293	54.806	28.826	54.806	3.3331	7.76687	27521000	30939000	709	NaN	7.76687	P30415;Q8CBP6	709;684	P30415	P30415	NK-tumor recognition protein;Putative peptidyl-prolyl cis-trans isomerase	Nktr	SSRSRSSSRSYTRSRSRSLPTSRSLSRSPSS	RSYTRsRsRSLPTsR
	-0.367266	S	2		___3	14-3-3 domain binding motif;Akt kinase substrate motif;Calmodulin-dependent protein kinase II substrate motif;Casein kinase II substrate motif;G protein-coupled receptor kinase 1 substrate motif;GSK3 kinase substrate motif;MAPKAPK1 kinase substrate motif;MAPKAPK2 kinase substrate motif;p70 Ribosomal S6 kinase substrate motif;Phosphorylase kinase substrate motif;PKA kinase substrate motif;PKC kina…									0.998805	0.00319293	54.806	28.826	54.806	3.3331	7.76687	27521000	30939000	711	NaN	7.76687	P30415;Q8CBP6	711;686	P30415	P30415	NK-tumor recognition protein;Putative peptidyl-prolyl cis-trans isomerase	Nktr	RSRSSSRSYTRSRSRSLPTSRSLSRSPSSRS
	-0.367155	S	3		___1	14-3-3 domain binding motif;AMP-activated protein kinase substrate motif;b-Adrenergic Receptor kinase substrate motif;Calmodulin-dependent protein kinase I substrate motif;Calmodulin-dependent protein kinase II substrate motif;Calmodulin-dependent protein kinase IV substrate motif;Casein kinase II substrate motif;Chk1 kinase substrate motif;PKA kinase substrate motif;PKC kinase substrate motif;ZI…	+	CST;HTP							0.947183	0.000364431	71.933	47.468	71.933	-1.4527	7.29905	8730900	11178000	2462	NaN	7.29905	E9Q394;E9Q474	2462;2480	E9Q394	E9Q394		Akap13	EKEEGDDGQDLRRTESDSGLKKGGNGNLVFM	QDLRRTEsDSGLKKG
	-0.366913	S	4		___1	Casein kinase II substrate motif	+	HTP							1	1.31394e-74	193.61	183.88	137.28	0.042482	9.42121	1049300000	1588300000	81	NaN	9.42121	Z4YJT3;Q6ZQ58	81;81	Z4YJT3	Z4YJT3	La-related protein 1	Larp1	RESPRPPAAAEAPAGSDGEDGGRRDFVEAPP	AAEAPAGsDGEDGGR
	-0.366225	S	3		___1	14-3-3 domain binding motif;Calmodulin-dependent protein kinase II substrate motif;Casein kinase II substrate motif;G protein-coupled receptor kinase 1 substrate motif;Phosphorylase kinase substrate motif;PKA kinase substrate motif;PKC kinase substrate motif	+	CST;HTP							0.999821	2.5391e-10	109.72	109.72	109.72	-0.092881	8.24596	60702000	115480000	329	NaN	8.24596	P70429-2;F8WJB9;E9PVP4;P70429	329;335;316;329	P70429-2	P70429-2	Ena/VASP-like protein	Evl	PNSSEAGRKPWERSNSVEKPVSSLLSRVKPA	KPWERsNsVEKPVSS
	-0.364515	S	3		___1	Casein kinase I substrate motif;Casein kinase II substrate motif;G protein-coupled receptor kinase 1 substrate motif	+	CST;HTP							0.995133	1.04913e-22	131.82	131.82	131.82	0.46463	8.38301	104470000	137080000	207	NaN	8.38301	P63101	207	P63101	P63101	14-3-3 protein zeta/delta	Ywhaz	AKTAFDEAIAELDTLSEESYKDSTLIMQLLR	IAELDTLsEESyKDS
	-0.364329	S	3		___1	ERK1,2 kinase substrate motif;G protein-coupled receptor kinase 1 substrate motif;GSK-3, ERK1, ERK2, CDK5 substrate motif;WW domain binding motif	+	HTP							0.999463	4.67332e-12	56.34	56.34	56.34	0.15642	7.77101	27232000	31789000	154	NaN	7.77101	Q7TSH6;Q6PFF0	154;154	Q7TSH6	Q7TSH6		Scaf4	SNAAPVAENVTNNEGSPPPPVKISSELAQAP	NVTNNEGsPPPPVKI
	-0.364106	S	2		___1	b-Adrenergic Receptor kinase substrate motif;ERK1,2 kinase substrate motif;GSK-3, ERK1, ERK2, CDK5 substrate motif;MAPKAPK2 kinase substrate motif;WW domain binding motif	+	HTP							1	0.000171999	99.069	80.339	99.069	1.7492	7.91234	42122000	39601000	866	NaN	7.91234	O08550;F8WJ40;F6W623	866;866;158	O08550	O08550	Histone-lysine N-methyltransferase 2B	Kmt2b	DESMEAKRDRASGPESPLQGPRIKHVCRHAA	DRASGPEsPLQGPRI
	-0.36329	S	2		___1	Casein kinase II substrate motif;ERK1,2 kinase substrate motif;GSK-3, ERK1, ERK2, CDK5 substrate motif;PKA kinase substrate motif;PKC kinase substrate motif;WW domain binding motif	+	HTP							0.999998	3.94134e-09	104.35	99.963	104.35	0.21954	7.86377	31023000	42053000	747	NaN	7.86377	Q6PGL7-2;Q6PGL7	747;747	Q6PGL7-2	Q6PGL7-2	WASH complex subunit FAM21	Fam21	SGVKPEDLKVDNARVSPEVGSADVASIAQKE	KVDNARVsPEVGsAD
	-0.362566	S	3		___1	BARD1 BRCT domain binding motif;Casein kinase I substrate motif;Casein kinase II substrate motif	+	HTP							1	1.18918e-52	179.19	179.19	147.75	-1.1604	8.21775	62535000	102560000	390	NaN	8.21775	E9PX94;Q8K1A6	390;435	E9PX94	E9PX94	Coiled-coil and C2 domain-containing protein 1A	Cc2d1a	GVLETAMRLANHDEGSDDEEEETPKKNTPAA	LANHDEGsDDEEEET
	-0.362418	S	3		___1	Casein kinase II substrate motif;ERK1,2 kinase substrate motif;GSK-3, ERK1, ERK2, CDK5 substrate motif;WW domain binding motif	+	HTP							0.881729	4.83732e-11	97.152	97.152	97.152	0.2462	7.82523	25208000	41661000	302	NaN	7.82523	P70429-2;F8WJB9;E9PVP4;P70429	302;308;289;302	P70429-2	P70429-2	Ena/VASP-like protein	Evl	ADRKEDESQTEDPSTSPSPGTRATSQPPNSS	QTEDPsTsPsPGtRA
	-0.362399	S	2		___2	14-3-3 domain binding motif;Akt kinase substrate motif;Calmodulin-dependent protein kinase II substrate motif;ERK1,2 kinase substrate motif;G protein-coupled receptor kinase 1 substrate motif;GSK-3, ERK1, ERK2, CDK5 substrate motif;MAPKAPK1 kinase substrate motif;PKA kinase substrate motif;PKC kinase substrate motif;WW domain binding motif;ZIP kinase substrate motif	+	HTP							1	4.39617e-07	110.31	99.548	48.527	-0.92825	9.84071	2684100000	4245500000	635	NaN	9.84071	E9PUK6;E9QKA4;A2A8V9;Q52KI8;A2A8V8;Q52KI8-2;F6UK16	635;635;630;635;621;635;81	E9PUK6	E9PUK6	Serine/arginine repetitive matrix protein 1	Srrm1	QRRYSPSPPPKRRTASPPPPPKRRASPSPPP	PPKRRtAsPPPPPKR
	-0.362399	T	2		___2	G protein-coupled receptor kinase 1 substrate motif;PAK2 kinase substrate motif;PKA kinase substrate motif;PKC kinase substrate motif	+	HTP							1	4.39617e-07	102.73	68.467	48.527	-0.92825	9.39124	1075700000	1386000000	633	NaN	9.39124	E9PUK6;E9QKA4;A2A8V9;Q52KI8;A2A8V8;Q52KI8-2;F6UK16	633;633;628;633;619;633;79	E9PUK6	E9PUK6	Serine/arginine repetitive matrix protein 1	Srrm1	PIQRRYSPSPPPKRRTASPPPPPKRRASPSP	sPPPKRRtAsPPPPP
	-0.361769	S	3		___1	Cdc2 kinase substrate motif;CDK kinase substrate motif;CDK1,2,4,6 kinase substrate motif;ERK1,2 kinase substrate motif;GSK-3, ERK1, ERK2, CDK5 substrate motif;WW domain binding motif	+	CST;HTP;LTP							1	1.19603e-06	83.751	83.751	83.751	-0.31645	7.75535	23426000	33505000	579	NaN	7.75535	Q8K1M6-3;E9PUD2;Q8K1M6-2;Q8K1M6;Q8K1M6-4	579;592;596;622;492	Q8K1M6-3	Q8K1M6-3	Dynamin-1-like protein	Dnm1l	LLAEEKSKPIPIMPASPQKGHAVNLLDVPVP	PIPIMPAsPQKGHAV
	-0.361213	S	2		___1	14-3-3 domain binding motif;b-Adrenergic Receptor kinase substrate motif;Calmodulin-dependent protein kinase II substrate motif;ERK1,2 kinase substrate motif;GSK-3, ERK1, ERK2, CDK5 substrate motif;MAPKAPK2 kinase substrate motif;PKA kinase substrate motif;PKC kinase substrate motif;WW domain binding motif	+	HTP							0.999474	7.33175e-09	116.98	101.39	84.734	-0.42527	8.84835	301580000	403680000	262	NaN	8.84835	A2AKA9;Q8K2F0;Q8K2F0-2	262;262;262	A2AKA9	A2AKA9	Bromodomain-containing protein 3	Brd3	TTTPTTSAITASRSESPPPLSEPKQAKVVAR	ITASRsEsPPPLSEP
	-0.361194	S	3		___1	14-3-3 domain binding motif;Calmodulin-dependent protein kinase II substrate motif;Calmodulin-dependent protein kinase IV substrate motif;Chk1 kinase substrate motif;ERK1,2 kinase substrate motif;G protein-coupled receptor kinase 1 substrate motif;GSK-3, ERK1, ERK2, CDK5 substrate motif;MDC1 BRCT domain binding motif;PKA kinase substrate motif;PKC kinase substrate motif;Plk1 PBD domain binding mo…	+	CST;HTP							0.804889	1.64287e-24	126.47	126.47	112.62	0.62076	8.94432	315830000	563850000	889	NaN	8.94432	H3BL37;O08784;Q05CS0;H3BIX0	889;853;889;805	H3BL37	H3BL37	Treacle protein	Tcof1	GQAIKSPPVSVNRNSSPAVPAPTPEGVQAVN	VSVNRNssPAVPAPt
	-0.360397	S	3		___1	b-Adrenergic Receptor kinase substrate motif;BARD1 BRCT domain binding motif;Casein kinase II substrate motif;G protein-coupled receptor kinase 1 substrate motif;GSK3 kinase substrate motif	+	HTP							0.996946	3.10108e-44	147.49	144.32	147.49	0.015237	8.33179	80398000	134280000	204	NaN	8.33179	Q9D620;E9Q8L9	204;204	Q9D620	Q9D620	Rab11 family-interacting protein 1	Rab11fip1	DTASAIVPSVTPSVDSDDESFSKDKKKKSKI	sVtPsVDsDDEsFSK
	-0.360008	S	3		___1	14-3-3 domain binding motif;b-Adrenergic Receptor kinase substrate motif;Calmodulin-dependent protein kinase II substrate motif;Casein kinase II substrate motif;G protein-coupled receptor kinase 1 substrate motif;PAK2 kinase substrate motif;PKA kinase substrate motif;PKC epsilon kinase substrate motif;PKC kinase substrate motif	+	CST;HTP							0.983602	3.09627e-34	153.12	148.54	153.12	-0.053	8.27556	77030000	111580000	1320	NaN	8.27556	Q6P4S8;K3W4P2	1320;1347	Q6P4S8	Q6P4S8	Integrator complex subunit 1	Ints1	TFHSLLTASLPPRRDSTEAPKPESSPEPPPG	SLPPRRDstEAPKPE
	-0.357012	S	2		___1	Casein kinase II substrate motif;ERK1,2 kinase substrate motif;GSK-3, ERK1, ERK2, CDK5 substrate motif;MDC1 BRCT domain binding motif;Plk1 PBD domain binding motif;WW domain binding motif	+	HTP							1	5.80986e-05	102.79	86.61	90.896	0.33805	8.44897	96152000	185020000	1439	NaN	8.44897	Q8BTI8;Q8BTI8-2;Q8BTI8-3	1439;1343;1439	Q8BTI8	Q8BTI8	Serine/arginine repetitive matrix protein 2	Srrm2	DTPQTPSRGRSECDSSPEPKALPQTPRARSH	GRsECDssPEPKALP
	-0.355553	S	3		___2	Cdc2 kinase substrate motif;CDK kinase substrate motif;CDK1,2,4,6 kinase substrate motif;ERK1,2 kinase substrate motif;G protein-coupled receptor kinase 1 substrate motif;Growth associated histone HI kinase substrate motif;GSK-3, ERK1, ERK2, CDK5 substrate motif;MDC1 BRCT domain binding motif;Plk1 PBD domain binding motif;WW domain binding motif	+	HTP							0.963366	1.24066e-06	83.358	80.302	74.325	0.016275	8.33951	74008000	144520000	446	NaN	8.33951	Q60596	446	Q60596	Q60596	DNA repair protein XRCC1	Xrcc1	KRPQPKAKTQAAGPSSPPRPPTPKETKAPSP	TQAAGPssPPRPPtP
	-0.354188	S	2		___1	b-Adrenergic Receptor kinase substrate motif;Casein kinase II substrate motif;ERK1,2 kinase substrate motif;Growth associated histone HI kinase substrate motif;GSK-3, ERK1, ERK2, CDK5 substrate motif;PKA kinase substrate motif;PKC kinase substrate motif;Pyruvate dehydrogenase kinase substrate motif;WW domain binding motif	+	CST;HTP							1	6.14716e-10	110.77	105.41	110.77	0.39927	8.04999	42108000	70094000	635	NaN	8.04999	Q3UMU9;Q3UMU9-3	635;644	Q3UMU9	Q3UMU9	Hepatoma-derived growth factor-related protein 2	Hdgfrp2	SEDGPRGGSSEELHDSPRDNSDPAKPGNERQ	ssEELHDsPRDNsDP
	-0.353469	S	2		___2	Casein kinase II substrate motif;ERK1,2 kinase substrate motif;Growth associated histone HI kinase substrate motif;GSK-3, ERK1, ERK2, CDK5 substrate motif;MDC1 BRCT domain binding motif;PKA kinase substrate motif;PKC kinase substrate motif;Plk1 PBD domain binding motif;WW domain binding motif	+	CST;HTP							0.784695	8.47404e-16	146.1	129.77	146.1	0.43095	8.35426	96536000	129550000	541	NaN	8.35426	Q3UHJ0-2;Q3UHJ0	541;622	Q3UHJ0-2	Q3UHJ0-2	AP2-associated protein kinase 1	Aak1	PTIQGQKVGSLTPPSSPKTQRAGHRRILSDV	GsLtPPssPKtQRAG
	-0.353284	S	3		___1	BARD1 BRCT domain binding motif;Casein kinase II substrate motif;G protein-coupled receptor kinase 1 substrate motif	+	HTP							1	1.06233e-40	172.42	165.16	89.272	-0.40973	8.34815	129540000	93373000	80	NaN	8.34815	Q9ESV0;F8WJA0	80;126	Q9ESV0	Q9ESV0	ATP-dependent RNA helicase DDX24	Ddx24	LFSSEETKKRKAQAVSEEEEEEEGQSSSPKK	KRKAQAVsEEEEEEE
	-0.353229	S	3		___1	14-3-3 domain binding motif;Calmodulin-dependent protein kinase II substrate motif;Casein kinase II substrate motif;DNA dependent Protein kinase substrate motif;G protein-coupled receptor kinase 1 substrate motif;PAK2 kinase substrate motif;PKA kinase substrate motif;PKC epsilon kinase substrate motif;PKC kinase substrate motif	+	CST;HTP							1	8.15633e-12	117.35	106.76	96.708	-1.1758	7.75082	30495000	25846000	379	7.0289	7.65946	Q3U1F9	379	Q3U1F9	Q3U1F9	Phosphoprotein associated with glycosphingolipid-enriched microdomains 1	Pag1	KTPNSISTLPPARRPSEEPEPDYEAIQTLNR	LPPARRPsEEPEPDy
	-0.351958	S	2		___1	14-3-3 domain binding motif;Akt kinase substrate motif;Calmodulin-dependent protein kinase II substrate motif;Casein kinase II substrate motif;MAPKAPK1 kinase substrate motif;PAK2 kinase substrate motif;PKA kinase substrate motif;PKC epsilon kinase substrate motif;PKC kinase substrate motif	+	CST;HTP							1	0.000897363	94.363	40.606	92.866	0.55416	9.02082	420980000	628080000	19	NaN	9.02082	Q99M08	19	Q99M08	Q99M08	Uncharacterized protein C4orf3 homolog		SQAASGTDGVRERRGSFEAGRRNQDEAPQSG	GVRERRGsFEAGRRN
	-0.350982	S	2		___1	Casein kinase II substrate motif;Cdc2 kinase substrate motif;CDK kinase substrate motif;CDK1,2,4,6 kinase substrate motif;ERK1,2 kinase substrate motif;GSK-3, ERK1, ERK2, CDK5 substrate motif;WW domain binding motif	+	HTP							0.999936	2.71322e-10	110.6	100.36	110.6	0.13468	8.01043	40307000	62122000	484	NaN	8.01043	Q8VBT6	484	Q8VBT6	Q8VBT6	Apolipoprotein B receptor	Apobr	EGQKGQEETSGAPDLSPERVLSLKEYPGPVG	TSGAPDLsPERVLSL
	-0.350927	S	3		___1	Casein kinase I substrate motif;Casein kinase II substrate motif;G protein-coupled receptor kinase 1 substrate motif	+	HTP							1	1.60176e-45	169.51	169.51	143.72	0.20357	8.38753	96482000	147600000	430	NaN	8.38753	P57787	430	P57787	P57787	Monocarboxylate transporter 4	Slc16a3	GKRKRPEVTEPEEVASEEKLHKPPVDVGVDS	TEPEEVAsEEKLHkP
	-0.34975	S	2		___1	Casein kinase II substrate motif;ERK1,2 kinase substrate motif;G protein-coupled receptor kinase 1 substrate motif;Growth associated histone HI kinase substrate motif;GSK3 kinase substrate motif;GSK-3, ERK1, ERK2, CDK5 substrate motif;PKA kinase substrate motif;PKC kinase substrate motif;WW domain binding motif	+	CST;HTP							0.783353	2.75913e-05	93.243	57.566	71.279	-0.45064	8.30929	79237000	124600000	595	NaN	8.30929	Q3UHJ0-2;Q3UHJ0	595;676	Q3UHJ0-2	Q3UHJ0-2	AP2-associated protein kinase 1	Aak1	ASLNKSKSATTTPSGSPRTSQQNVSNASEGS	ATttPsGsPRTSQQN
	-0.349566	S	3		___2	Casein kinase II substrate motif;G protein-coupled receptor kinase 1 substrate motif;GSK3 kinase substrate motif;MDC1 BRCT domain binding motif;Plk1 PBD domain binding motif	+	CST;HTP							0.999927	6.59862e-22	131.26	131.26	131.26	0.21268	9.24961	604580000	1172200000	434	NaN	9.24961	Q8BTI8;Q8BTI8-2;Q8BTI8-3	434;338;434	Q8BTI8	Q8BTI8	Serine/arginine repetitive matrix protein 2	Srrm2	CPPSPQPTKGSRHASSSPESLKPTPAPGSRR	KGsRHAsssPEsLKP
	-0.349346	S	2		___1	DNA dependent Protein kinase substrate motif;ERK1,2 kinase substrate motif;G protein-coupled receptor kinase 1 substrate motif;GSK-3, ERK1, ERK2, CDK5 substrate motif;WW domain binding motif	+	CST;HTP;LTP							1	4.85907e-06	101.72	73.099	67.326	-0.14194	8.24724	80654000	96041000	75	NaN	8.24724	Q61235	75	Q61235	Q61235	Beta-2-syntrophin	Sntb2	GESLPGSPNRGLGPPSPPAPPRGPAGEASAS	NRGLGPPsPPAPPRG
	-0.349217	S	2		___1	14-3-3 domain binding motif;Calmodulin-dependent protein kinase II substrate motif;Calmodulin-dependent protein kinase IV substrate motif;Casein kinase II substrate motif;Chk1 kinase substrate motif;ERK1,2 kinase substrate motif;GSK-3, ERK1, ERK2, CDK5 substrate motif;PKA kinase substrate motif;PKC kinase substrate motif;Pyruvate dehydrogenase kinase substrate motif;WW domain binding motif	+	HTP							0.972145	6.42574e-122	238.44	213.29	224.39	0.64339	9.43645	1143400000	1588400000	17	NaN	9.43645	D6RI64;Q9R0P4	17;17	D6RI64	D6RI64	Small acidic protein	1110004F10Rik;Smap	SAARESHPHGVKRSASPDDDLGSSNWEAADL	HGVKRsAsPDDDLGs
	-0.349033	S	3		___1	b-Adrenergic Receptor kinase substrate motif;Casein kinase II substrate motif	+	HTP							1	6.70187e-23	134.62	134.62	134.62	-0.58532	8.26461	71684000	112230000	755	NaN	8.26461	Q3UW53	755	Q3UW53	Q3UW53	Protein Niban	Fam129a	KIHPEASHPAAIQQDSCEEREVREKEAQPLE	PAAIQQDsCEEREVR
	-0.348996	S	3		___1	Casein kinase II substrate motif;DNA dependent Protein kinase substrate motif;G protein-coupled receptor kinase 1 substrate motif	+	HTP							0.835211	3.67896e-14	116.06	96.149	101.92	0.1012	8.1328	58031000	77740000	468	NaN	8.1328	P30415;Q8CBP6	468;443	P30415	P30415	NK-tumor recognition protein;Putative peptidyl-prolyl cis-trans isomerase	Nktr	RQTKKRRIVMPDLEPSRSPTHRMKSSCVRER	VMPDLEPsRsPtHRM
	-0.34694	S	2		___1	Casein kinase II substrate motif;MDC1 BRCT domain binding motif;PKA kinase substrate motif;PKC kinase substrate motif;Plk1 PBD domain binding motif	+	CST;HTP							0.90073	5.0433e-05	77.72	77.72	77.72	0.12823	7.53398	15338000	18858000	332	NaN	7.53398	Q8BTI8;Q8BTI8-2;Q8BTI8-3	332;236;332	Q8BTI8	Q8BTI8	Serine/arginine repetitive matrix protein 2	Srrm2	NIQQPSSPAPSTKQSSSPYEDKDKKEKSAVR	APstKQsssPyEDKD
	-0.346261	S	3		___1	Casein kinase I substrate motif;ERK1,2 kinase substrate motif;G protein-coupled receptor kinase 1 substrate motif;GSK-3, ERK1, ERK2, CDK5 substrate motif;PKA kinase substrate motif;PKC kinase substrate motif;WW domain binding motif	+	HTP							1	8.4258e-07	92.39	78.874	47.082	0.88316	8.03587	42248000	66365000	1388	NaN	8.03587	E9QAB8;H3BJK2;Q6DIC0;F2Z4A9;H3BLH0;H3BJM2;H3BKN5;H3BJI1;H3BLI4;Q9D007;H3BKJ3;H3BK47	1388;1330;1382;1388;1388;41;9;41;81;41;41;81	E9QAB8	E9QAB8	Probable global transcription activator SNF2L2	Smarca2	EKAKKRRGRPPAEKLSPNPPKLTKQMNAIID	RPPAEKLsPNPPKLT
	-0.346096	S	3		___1	BARD1 BRCT domain binding motif;Casein kinase I substrate motif;Casein kinase II substrate motif;MDC1 BRCT domain binding motif;Plk1 PBD domain binding motif	+	CST;HTP							1	1.45269e-74	185	185	185	0.37518	9.13561	478460000	888040000	67	NaN	9.13561	Q61033-2;Q61029-4;Q61029-2;Q61029-3;Q61029;Q61033	67;67;67;67;67;67	Q61033-2	Q61033-2	Lamina-associated polypeptide 2, isoforms alpha/zeta;Lamina-associated polypeptide 2, isoforms beta/delta/epsilon/gamma	Tmpo	PLAAGANSKGPPDFSSDEEREPTPVLGSGAS	KGPPDFssDEErEPt
	-0.343147	S	2		___2	Cdc2 kinase substrate motif;CDK kinase substrate motif;CDK1,2,4,6 kinase substrate motif;ERK1,2 kinase substrate motif;Growth associated histone HI kinase substrate motif;GSK-3, ERK1, ERK2, CDK5 substrate motif;WW domain binding motif	+	HTP							1	0.000217899	103.9	87.372	103.9	0.81825	8.0308	46657000	60689000	37	NaN	8.0308	Q9D1P2-2;Q9D1P2	37;37	Q9D1P2-2	Q9D1P2-2	Histone acetyltransferase KAT8	Kat8	EPGPGENAAVEGPARSPGRVSPPTPARGEPE	AVEGPARsPGRVsPP
	-0.343147	S	3		___2	Casein kinase II substrate motif;ERK1,2 kinase substrate motif;G protein-coupled receptor kinase 1 substrate motif;GSK-3, ERK1, ERK2, CDK5 substrate motif;PKA kinase substrate motif;PKC kinase substrate motif;WW domain binding motif	+	HTP							0.99784	0.000217899	103.9	87.372	43.261	0.56671	8.0308	46657000	60689000	42	NaN	8.0308	Q9D1P2-2;Q9D1P2	42;42	Q9D1P2-2	Q9D1P2-2	Histone acetyltransferase KAT8	Kat8	ENAAVEGPARSPGRVSPPTPARGEPEVTVEI	ARsPGRVsPPtPARG
	-0.342561	S	2		___1	Casein kinase I substrate motif;Casein kinase II substrate motif;G protein-coupled receptor kinase 1 substrate motif;PKA kinase substrate motif;PKC kinase substrate motif	+	CST							0.835617	1.25591e-09	135.81	113.24	135.81	0.37255	8.3846	101390000	141050000	735	NaN	8.3846	G3UYD0;Q9ESZ8-5;Q9ESZ8-4;Q9ESZ8-3;Q9ESZ8-6;Q9ESZ8-2;Q9ESZ8	735;761;780;782;799;801;820	G3UYD0	G3UYD0	General transcription factor II-I	Gtf2i	IKKPEMFETAIKESTSSKSPPRKINSSPNVN	TAIKESTssKsPPRK
	-0.342012	S	3		___1	14-3-3 domain binding motif;Aurora-A kinase substrate motif;Calmodulin-dependent protein kinase II alpha substrate motif;Calmodulin-dependent protein kinase II substrate motif;Calmodulin-dependent protein kinase IV substrate motif;Casein kinase II substrate motif;Chk1 kinase substrate motif;PAK2 kinase substrate motif;Phosphorylase kinase substrate motif;PKA kinase substrate motif;PKC epsilon kin…	+	CST;HTP							0.999999	2.56983e-53	178.15	159.95	178.15	-0.6869	8.74319	218330000	335260000	556	NaN	8.74319	E9Q983;Q8K4L2;Q8K4L3;E9Q3Z5	556;960;960;846	E9Q983	E9Q983	Supervillin	Svil	GDGQKEPKHVVLRRGSLELGNPSAAHLGDEL	HVVLRRGsLELGNPs
	-0.341702	S	2		___1	ERK1,2 kinase substrate motif;GSK-3, ERK1, ERK2, CDK5 substrate motif;WW domain binding motif	+	HTP							1	5.13757e-19	137.32	129.59	137.32	0.21344	8.89838	331550000	459820000	8	NaN	8.89838	Q99J36	8	Q99J36	Q99J36	THUMP domain-containing protein 1	Thumpd1	________MATTAQQSPQPVAGKRKGKSQFL	MATTAQQsPQPVAGK
	-0.340368	S	2		___1	ERK1,2 kinase substrate motif;GSK-3, ERK1, ERK2, CDK5 substrate motif;WW domain binding motif	+	HTP							0.999991	3.97292e-40	159.26	156.71	159.26	0.8673	8.45769	119050000	167820000	6	NaN	8.45769	Q61191;B1AUX2	6;6	Q61191	Q61191	Host cell factor 1;HCF N-terminal chain 1;HCF N-terminal chain 2;HCF N-terminal chain 3;HCF N-terminal chain 4;HCF N-terminal chain 5;HCF N-terminal chain 6;HCF C-terminal chain 1;HCF C-terminal chain 2;HCF C-terminal chain 3;HCF C-terminal chain 4;HCF C-terminal chain 5;HCF C-terminal chain 6	Hcfc1	__________MASAVSPANLPAVLLQPRWKR	__MASAVsPANLPAV
	-0.339199	S	2		___1	Casein kinase II substrate motif;DNA dependent Protein kinase substrate motif;G protein-coupled receptor kinase 1 substrate motif;GSK3 kinase substrate motif	+	HTP							0.960142	0.000230568	71.601	60.486	71.601	-1.5307	7.16873	6772200	7976100	177	NaN	7.16873	Q8C4Q9	177	Q8C4Q9	Q8C4Q9	Transmembrane protein 154	Tmem154	CLPTLKEEKEPNPSPSDNES___________	KEPNPSPsDNES___
	-0.339071	S	2		___1	14-3-3 domain binding motif;Akt kinase substrate motif;AMP-activated protein kinase 2 substrate motif;Calmodulin-dependent protein kinase II substrate motif;DNA dependent Protein kinase substrate motif;MAPKAPK1 kinase substrate motif;PKA kinase substrate motif;PKC kinase substrate motif	+	CST;HTP							0.999843	0.0160918	56.378	6.4643	56.378	-0.43128	7.41875	11055000	15172000	661	NaN	7.41875	Q9QYB5-2;Q9QYB5;Q9QYB8-3;Q9QYB8;Q9QYC0	661;693;464;712;724	Q9QYB5-2	Q9QYB5-2	Gamma-adducin;Beta-adducin;Alpha-adducin	Add3;Add2;Add1	PSKSPSKKKKKFRTPSFLKKNKKKEKVEA__	KKKFRtPsFLKKNKK
	-0.338944	S	2		___1	Cdc2 kinase substrate motif;CDK kinase substrate motif;CDK1,2,4,6 kinase substrate motif;ERK1,2 kinase substrate motif;G protein-coupled receptor kinase 1 substrate motif;Growth associated histone HI kinase substrate motif;GSK-3, ERK1, ERK2, CDK5 substrate motif;WW domain binding motif	+	HTP							0.913244	0.00344448	91.093	69.408	91.093	1.8773	7.29061	7945000	11581000	266	NaN	7.29061	P59644	266	P59644	P59644	Phosphatidylinositol 4,5-bisphosphate 5-phosphatase A	Inpp5j	DKCLYTPERAAGPATSPPRAQAFSDPRLSPS	RAAGPATsPPRAQAF
	-0.338925	S	3		___1	ERK1,2 kinase substrate motif;GSK-3, ERK1, ERK2, CDK5 substrate motif;WW domain binding motif	+	HTP							0.999646	2.97052e-40	157.7	157.7	157.7	0.50106	8.58289	159100000	223640000	1778	NaN	8.58289	P83741-4;P83741-5;P83741;P83741-2;P83741-3;F6U2S8;F7CZC4	1778;1845;2027;2276;2285;48;392	P83741-4	P83741-4	Serine/threonine-protein kinase WNK1	Wnk1	AFLSRGTEDGSGSPHSPPHLCSKSLPVQNLS	DGsGsPHsPPHLCSK
	-0.338889	S	2		___1	ATM kinase substrate motif;Casein kinase II substrate motif;DNA dependent Protein kinase substrate motif;MAPKAPK2 kinase substrate motif	+	CST;HTP;LTP							0.998021	0.00208246	57.525	43.093	57.525	0.40499	8.0859	51171000	70699000	135	NaN	8.0859	P70671	135	P70671	P70671	Interferon regulatory factor 3	Irf3	LGASPDTNGKSSLPHSQENLPKLFDGLILGP	GKSsLPHsQENLPKL
	-0.338104	S	2		___1	Cdc2 kinase substrate motif;CDK kinase substrate motif;CDK1,2,4,6 kinase substrate motif;ERK1,2 kinase substrate motif;GSK-3, ERK1, ERK2, CDK5 substrate motif;WW domain binding motif	+	HTP							1	1.25923e-20	133.35	129.44	133.35	0.31657	7.44686	12135000	15846000	12	NaN	7.44686	Q3TAI4;Q9CYZ2;A2AUD5;Q3TUJ9;Q8BKP1	12;12;12;12;12	Q3TAI4	Q3TAI4	Tumor protein D54	Tpd52l2	____MDSASQDINLNSPNKGVLSDFMTDVPV	sQDINLNsPNKGVLS
	-0.337922	S	2		___2	PKA kinase substrate motif;PKC kinase substrate motif									1	0.0153556	40.242	16.286	40.242	-1.9727	7.71765	17544000	34653000	455	NaN	7.71765	Q6DFV7	455	Q6DFV7	Q6DFV7	Nuclear receptor coactivator 7	Ncoa7	CLSYDQKKDGPHTVMSAKKGHVQSAQEVMGP
	-0.337922	T	2		___2	Casein kinase II substrate motif;G protein-coupled receptor kinase 1 substrate motif									1	0.0153556	40.242	16.286	40.242	-1.9727	7.71765	17544000	34653000	452	NaN	7.71765	Q6DFV7	452	Q6DFV7	Q6DFV7	Nuclear receptor coactivator 7	Ncoa7	TKECLSYDQKKDGPHTVMSAKKGHVQSAQEV
	-0.337521	S	3		___1	14-3-3 domain binding motif;Akt kinase substrate motif;Calmodulin-dependent protein kinase II substrate motif;MAPKAPK1 kinase substrate motif;PKA kinase substrate motif;PKC kinase substrate motif;ZIP kinase substrate motif									0.90536	1.16176e-17	111.01	111.01	111.01	0.69654	7.98238	46977000	49048000	7	NaN	7.98238	F6SMP3;O70161-2;O70161-3;O70161;F8WHW6	7;494;554;554;554	F6SMP3	F6SMP3	Phosphatidylinositol 4-phosphate 5-kinase type-1 gamma	Pip5k1c	_________URRRTQSSGQDGRPQEEPHAED
	-0.336519	S	3		___1	14-3-3 domain binding motif;Calmodulin-dependent protein kinase II substrate motif;Casein kinase II substrate motif;PKA kinase substrate motif;PKC epsilon kinase substrate motif;PKC kinase substrate motif									0.83572	0.00365108	45.368	45.368	45.368	-0.63335	7.10646	5319300	7458300	8	NaN	7.10646	A2AT37	8	A2AT37	A2AT37		Upf2	________MPAERKKSASMEEKESLLNNKEK
	-0.335954	S	2		___1	Cdc2 kinase substrate motif;CDK kinase substrate motif;CDK1,2,4,6 kinase substrate motif;ERK1,2 kinase substrate motif;Growth associated histone HI kinase substrate motif;GSK-3, ERK1, ERK2, CDK5 substrate motif;MDC1 BRCT domain binding motif;Plk1 PBD domain binding motif;WW domain binding motif	+	HTP							0.909656	1.02189e-36	174.29	151.86	116.98	0.99899	8.22386	68221000	99219000	99	NaN	8.22386	B1ATI9;Q3U432;Q60780	99;103;108	B1ATI9	B1ATI9	Growth arrest-specific protein 7	Gas7	SLRKSTGDSQNLGSSSPGRKQSKENTITINC	sQNLGsssPGRKQSK
	-0.335189	S	2		___2	Casein kinase II substrate motif;G protein-coupled receptor kinase 1 substrate motif	+	CST;HTP							1	7.60413e-37	167.05	143.41	167.05	-1.1488	8.83488	255790000	427940000	256	NaN	8.83488	Q05CL8	256	Q05CL8	Q05CL8	La-related protein 7	Larp7	GVCKATKRPRTASEGSEAETPEAPKQPAKKK	PRtAsEGsEAEtPEA
	-0.335008	S	2		___1	ERK1,2 kinase substrate motif;GSK-3, ERK1, ERK2, CDK5 substrate motif;PKA kinase substrate motif;PKC kinase substrate motif;WW domain binding motif									0.999923	0.0120709	58.723	34.224	58.723	-0.45736	7.24267	4730500	12755000	322	NaN	7.24267	F8VPJ6	322	F8VPJ6	F8VPJ6		Rfx7	LQRKIQKKQQEQKLQSPLPGESSAKKPEGTT
	-0.333025	T	2		___1	G protein-coupled receptor kinase 1 substrate motif;GSK-3, ERK1, ERK2, CDK5 substrate motif;WW domain binding motif	+	HTP							0.99877	0.000112392	78.69	66.059	78.69	0.23827	7.853	29786000	41500000	2211	NaN	7.853	E9PX61;E9Q2E4	2211;2503	E9PX61	E9PX61		Gm15800	SPGDVAGIGWERTEGTPPPPGQPAKGRVYFT	GWERTEGtPPPPGQP
	-0.33179	S	2		___1	Casein kinase I substrate motif;Casein kinase II substrate motif;ERK1,2 kinase substrate motif;GSK-3, ERK1, ERK2, CDK5 substrate motif;PKA kinase substrate motif;PKC kinase substrate motif;WW domain binding motif									1	5.28194e-61	201.61	194.24	190.26	0.60758	8.94295	286200000	590690000	665	NaN	8.94295	A2A484;Q3UH28;Q3U1M7;A2A483;E9Q8D1;A2A482;E9Q8D3;A2A485	674;645;665;670;690;645;662;665	A2A484;A2A485	A2A485		Zmynd8	PVSEKPDPTPAKDKASPEPEKDFVEKAKPSP
	-0.331227	S	2		___1	14-3-3 domain binding motif;Calmodulin-dependent protein kinase II alpha substrate motif;Calmodulin-dependent protein kinase II substrate motif;Calmodulin-dependent protein kinase IV substrate motif;Casein kinase II substrate motif;Chk1 kinase substrate motif;Phosphorylase kinase substrate motif;PKA kinase substrate motif;PKC kinase substrate motif	+	CST;HTP							0.793897	0.0239617	55.314	44.093	55.314	1.3838	7.26935	7146000	11447000	132	NaN	7.26935	Q9JM13;D3YWB4;D3Z2L2	132;133;133	Q9JM13	Q9JM13	Rab5 GDP/GTP exchange factor	Rabgef1	IQEAKAPSPSINRQTSIETDRVTKEFIDFLK	PsINRQtsIEtDRVT
	-0.331028	S	2		___2	14-3-3 domain binding motif;Calmodulin-dependent protein kinase II substrate motif;Calmodulin-dependent protein kinase IV substrate motif;Casein kinase II substrate motif;Chk1 kinase substrate motif;ERK1,2 kinase substrate motif;G protein-coupled receptor kinase 1 substrate motif;Growth associated histone HI kinase substrate motif;GSK-3, ERK1, ERK2, CDK5 substrate motif;PKA kinase substrate motif…	+	CST;HTP							1	0.00107559	52.112	43.285	44.816	-3.06	7.24155	8140900	9299400	826	NaN	7.24155	Q3U3C9-4;Q3U3C9-3;Q3U3C9;Q3U3C9-2	826;823;826;836	Q3U3C9-4	Q3U3C9-4	Genetic suppressor element 1	Gse1	VAQKRRKRRRMLRERSPSPPAVQCKRQTPSP	RRMLRERsPsPPAVQ
	-0.331028	S	2		___2	14-3-3 domain binding motif;Akt kinase substrate motif;Calmodulin-dependent protein kinase II substrate motif;DNA dependent Protein kinase substrate motif;ERK1,2 kinase substrate motif;GSK-3, ERK1, ERK2, CDK5 substrate motif;MAPKAPK1 kinase substrate motif;PKA kinase substrate motif;PKC kinase substrate motif;WW domain binding motif	+	CST;HTP							1	0.00107559	52.112	43.285	44.816	-3.06	7.24155	8140900	9299400	828	NaN	7.24155	Q3U3C9-4;Q3U3C9-3;Q3U3C9;Q3U3C9-2	828;825;828;838	Q3U3C9-4	Q3U3C9-4	Genetic suppressor element 1	Gse1	QKRRKRRRMLRERSPSPPAVQCKRQTPSPRL	MLRERsPsPPAVQCK
	-0.329214	S	2		___1	Casein kinase II substrate motif;G protein-coupled receptor kinase 1 substrate motif;GSK3 kinase substrate motif;MAPKAPK2 kinase substrate motif	+	HTP;LTP							0.754339	2.63989e-10	123.29	90.996	91.07	0.099465	8.03874	53774000	55560000	585	NaN	8.03874	D3Z0Q6;Q9Z1E4	585;649	D3Z0Q6	D3Z0Q6	Glycogen [starch] synthase, muscle	Gys1	YRYPRPASVPPSPSLSRHSSPHQSEDEEEPR	VPPsPsLsRHssPHQ
	-0.328598	S	3		___1	Casein kinase II substrate motif;ERK1,2 kinase substrate motif;G protein-coupled receptor kinase 1 substrate motif;Growth associated histone HI kinase substrate motif;GSK-3, ERK1, ERK2, CDK5 substrate motif;WW domain binding motif	+	HTP							0.961328	4.52979e-30	143.48	143.48	143.48	-0.58174	8.20763	65065000	96239000	108	NaN	8.20763	Q8K327	108	Q8K327	Q8K327	Chromosome alignment-maintaining phosphoprotein 1	Champ1	EQPKEQPSKDTESGKSPSPPERQNPAFDPAE	KDtEsGKsPsPPERQ
	-0.327964	S	3		___1	14-3-3 domain binding motif;Akt kinase substrate motif;AMP-activated protein kinase 2 substrate motif;Calmodulin-dependent protein kinase II substrate motif;ERK1, ERK2, SAPK, CDK5 and GSK3 kinase substrate motif;ERK1,2 kinase substrate motif;Growth associated histone HI kinase substrate motif;GSK-3, ERK1, ERK2, CDK5 substrate motif;MAPKAPK1 kinase substrate motif;PKA kinase substrate motif;PKC ki…									1	0.000848154	68.355	54.346	67.385	-0.036282	7.87217	30387000	44115000	182	NaN	7.87217	G3UXL6;Q3UIK4	182;399	G3UXL6	G3UXL6	Methyltransferase-like protein 14	Mettl14	YLTGCTEEIERLRPKSPPPKSKSDRGGGAPR
	-0.326805	T	2		___1	GSK-3, ERK1, ERK2, CDK5 substrate motif;PKA kinase substrate motif;PKC kinase substrate motif;RAF1 kinase substrate motif;WW domain binding motif	+	HTP							1	0.0509004	44.511	28.133	44.511	-0.64245	7.12908	4979300	8482000	96	NaN	7.12908	B8JJB2;Q3TJD7-3;B8JJB3;Q8BVJ7;Q3TJD7	96;96;96;96;96	B8JJB2	B8JJB2	PDZ and LIM domain protein 7	Pdlim7	LSRAQPVQSKPQKALTPPADPPRYTFAPSAS	SKPQKALtPPADPPr
	-0.32648	S	3		___1	ERK1,2 kinase substrate motif;G protein-coupled receptor kinase 1 substrate motif;Growth associated histone HI kinase substrate motif;GSK3 kinase substrate motif;GSK-3, ERK1, ERK2, CDK5 substrate motif;MAPKAPK2 kinase substrate motif;WW domain binding motif	+	HTP							0.843377	2.7065e-09	77.469	72.943	77.469	0.9951	7.54329	13287000	21650000	85	NaN	7.54329	Q8BJ05;Q8BJ05-2;Q8BJ05-3	85;85;85	Q8BJ05	Q8BJ05	Zinc finger CCCH domain-containing protein 14	Zc3h14	LDKLRSVTTEPSSLKSPDASIFDSHVPSNKS	tEPssLKsPDAsIFD
	-0.325774	S	3		___1	ERK1,2 kinase substrate motif;GSK-3, ERK1, ERK2, CDK5 substrate motif;MAPKAPK2 kinase substrate motif;MDC1 BRCT domain binding motif;Plk1 PBD domain binding motif;WW domain binding motif	+	CST;HTP							0.958928	4.19072e-19	116.35	106.6	116.35	-0.89384	8.14211	42472000	96237000	856	NaN	8.14211	P41230-3;P41230-2;P41230	856;897;897	P41230-3	P41230-3	Lysine-specific demethylase 5C	Kdm5c	AYQTEAREALVSQPSSPGLLQSLLERGQQLG	ALVsQPSsPGLLQSL
	-0.323715	S	2		___1	b-Adrenergic Receptor kinase substrate motif;Casein kinase II substrate motif;G protein-coupled receptor kinase 1 substrate motif;Pyruvate dehydrogenase kinase substrate motif	+	HTP							0.999905	2.28159e-06	79.426	70.956	79.426	0.88059	6.67557	1667900	3069800	51	NaN	6.67557	Q3TYA6	51	Q3TYA6	Q3TYA6	M-phase phosphoprotein 8	Mphosph8	EEKDAATKGTVAVGDSEEDGEDVFEVERILD	GTVAVGDsEEDGEDV
	-0.323642	T	2		___2	b-Adrenergic Receptor kinase substrate motif;Casein kinase II substrate motif;GSK-3, ERK1, ERK2, CDK5 substrate motif;MAPKAPK2 kinase substrate motif;WW domain binding motif	+	HTP							0.999997	1.37715e-16	133.95	128.45	132.62	0.63354	8.64691	178010000	265510000	163	NaN	8.64691	Q00PI9	163	Q00PI9	Q00PI9	Heterogeneous nuclear ribonucleoprotein U-like protein 2	Hnrnpul2	GKGEEDGPEERSGDETPGSEAPGDKAVEEQG	EERsGDEtPGsEAPG
	-0.322325	S	2		___1	14-3-3 domain binding motif;Calmodulin-dependent protein kinase II substrate motif;Calmodulin-dependent protein kinase IV substrate motif;Casein kinase II substrate motif;Chk1 kinase substrate motif;ERK1,2 kinase substrate motif;GSK-3, ERK1, ERK2, CDK5 substrate motif;PKA kinase substrate motif;PKC kinase substrate motif;WW domain binding motif	+	CST;HTP							0.999999	2.77301e-24	160.78	160.78	160.78	-0.12534	9.24167	729130000	1015400000	425	NaN	9.24167	F6RJ39;Q9JIX8-4;Q9JIX8	425;439;479	F6RJ39	F6RJ39	Apoptotic chromatin condensation inducer in the nucleus	Acin1	EPLASPHPAQLLRSLSPLSGTTDTKAESPAG	AQLLRsLsPLsGttD
	-0.321423	S	3		___1	14-3-3 domain binding motif;Calmodulin-dependent protein kinase II substrate motif;ERK1,2 kinase substrate motif;Growth associated histone HI kinase substrate motif;GSK-3, ERK1, ERK2, CDK5 substrate motif;MAPKAPK2 kinase substrate motif;PKA kinase substrate motif;PKC kinase substrate motif;WW domain binding motif	+	HTP							0.980086	7.64791e-07	69.016	63.669	50.891	2.3081	7.28251	8791500	10374000	673	NaN	7.28251	D6RE33;Q3UJB9-2;Q3UJB9;G5E896;F6ZJ27	673;733;733;733;314	D6RE33	D6RE33	Enhancer of mRNA-decapping protein 4	Edc4	VEPLGLPQASPSRTRSPDVISSASTALSQDI	AsPsRtRsPDVIsSA
	-0.318758	S	2		___2	ERK1,2 kinase substrate motif;GSK-3, ERK1, ERK2, CDK5 substrate motif;PKA kinase substrate motif;PKC kinase substrate motif;WW domain binding motif	+	CST;HTP							1	0.0013008	73.273	52.214	43.77	0.03172	8.68679	180480000	305690000	332	NaN	8.68679	A2A7T3;Q80TZ9	332;600	A2A7T3	A2A7T3	Arginine-glutamic acid dipeptide repeats protein	Rere	RSGRKKQPTSPDGRASPINEDIRSSGRNSPS	tsPDGRAsPINEDIR
	-0.318758	S	3		___2	ERK1,2 kinase substrate motif;GSK-3, ERK1, ERK2, CDK5 substrate motif;PKA kinase substrate motif;WW domain binding motif	+	CST;HTP							0.888251	0.0013008	48.579	37.814	48.579	-1.9811	7.73061	16068000	37711000	326	NaN	7.73061	A2A7T3;Q80TZ9	326;594	A2A7T3	A2A7T3	Arginine-glutamic acid dipeptide repeats protein	Rere	GSMSTLRSGRKKQPTSPDGRASPINEDIRSS	GRKKQPtsPDGRAsP
	-0.318524	S	3		___1	ERK1,2 kinase substrate motif;GSK-3, ERK1, ERK2, CDK5 substrate motif;WW domain binding motif	+	CST;HTP							0.986009	3.10918e-10	74.364	74.364	74.364	0.41027	8.45372	123780000	160480000	328	NaN	8.45372	Q9ERG0-2;Q9ERG0	328;488	Q9ERG0-2	Q9ERG0-2	LIM domain and actin-binding protein 1	Lima1	LGRPAQPPNAGESPHSPGVEDAPIAKVGVLA	NAGEsPHsPGVEDAP
	-0.318146	S	2		___1	14-3-3 domain binding motif;Calmodulin-dependent protein kinase II substrate motif;Casein kinase II substrate motif;MDC1 BRCT domain binding motif;PKA kinase substrate motif;PKC kinase substrate motif;Plk1 PBD domain binding motif	+	HTP							0.982169	3.02403e-41	171.44	140.22	126.18	0.52286	8.77091	300300000	289780000	626	NaN	8.77091	Q8VDP4	626	Q8VDP4	Q8VDP4	DBIRD complex subunit KIAA1967 homolog		DSPLKEDGLLPKRPSSGGEEEEKARGEAAED	LLPKRPssGGEEEEK
	-0.317157	S	3		___2	Akt kinase substrate motif;Casein kinase II substrate motif;DNA dependent Protein kinase substrate motif;ERK1,2 kinase substrate motif;Growth associated histone HI kinase substrate motif;GSK-3, ERK1, ERK2, CDK5 substrate motif;PKA kinase substrate motif;PKC kinase substrate motif;WW domain binding motif	+	HTP							0.999969	2.18915e-05	63.979	63.979	63.979	-0.98701	7.56037	13232000	23107000	204	NaN	7.56037	Q80XU3	204	Q80XU3	Q80XU3	Nuclear ubiquitous casein and cyclin-dependent kinase substrate 1	Nucks1	VGRPTASKKSKEKTPSPKEEDEEAESPPEKK	KSKEKtPsPKEEDEE
	-0.316061	S	3		___1	b-Adrenergic Receptor kinase substrate motif;Casein kinase I substrate motif;Casein kinase II substrate motif;G protein-coupled receptor kinase 1 substrate motif;PKA kinase substrate motif	+	CST;HTP							1	7.27609e-253	336.66	336.66	164.83	-0.41828	9.5808	1370000000	2438900000	892	NaN	9.5808	E9PUK6;A2A8V9;Q52KI8;A2A8V8	892;887;915;878	E9PUK6	E9PUK6	Serine/arginine repetitive matrix protein 1	Srrm1	QEEPAAAPEPRKETESEAEDDNLDDLERHLR	EPRKEtEsEAEDDNL
	-0.315738	S	3		___3	Casein kinase II substrate motif;G protein-coupled receptor kinase 1 substrate motif;GSK3 kinase substrate motif;PKA kinase substrate motif;PKC kinase substrate motif	+	CST;HTP							1	1.09237e-17	111.82	108.58	72.573	-0.054355	8.68918	185710000	303140000	128	NaN	8.68918	P51859;E0CXA0	128;96	P51859	P51859	Hepatoma-derived growth factor	Hdgf	EVEPEAHEGDGDKKGSAEGSSDEEGKLVIDE	GDGDkKGsAEGssDE
	-0.315738	S	3		___3	Casein kinase II substrate motif;MAPKAPK2 kinase substrate motif	+	CST;HTP							1	1.49965e-133	241.04	241.04	72.573	-0.054355	9.94192	3323500000	5424800000	132	NaN	9.94192	P51859;E0CXA0	132;100	P51859	P51859	Hepatoma-derived growth factor	Hdgf	EAHEGDGDKKGSAEGSSDEEGKLVIDEPAKE	kKGsAEGssDEEGKL
	-0.315738	S	3		___3	BARD1 BRCT domain binding motif;Casein kinase I substrate motif;Casein kinase II substrate motif;MDC1 BRCT domain binding motif;Plk1 PBD domain binding motif	+	CST;HTP							1	1.49965e-133	241.04	241.04	72.573	-0.054355	9.99169	3660700000	6149800000	133	NaN	9.99169	P51859;E0CXA0	133;101	P51859	P51859	Hepatoma-derived growth factor	Hdgf	AHEGDGDKKGSAEGSSDEEGKLVIDEPAKEK	KGsAEGssDEEGKLV
	-0.315056	S	3		___1	Casein kinase II substrate motif;G protein-coupled receptor kinase 1 substrate motif;GSK3 kinase substrate motif									1	0.0222962	40.724	22.399	40.724	2.2659	7.05831	5709100	5728300	286	NaN	7.05831	Q9D0P5	286	Q9D0P5	Q9D0P5	Pygopus homolog 1	Pygo1	VELKNVNRNNVVQENSRSGSAEATNNHANGT
	-0.313889	S	3		___1	ERK1,2 kinase substrate motif;Growth associated histone HI kinase substrate motif;GSK-3, ERK1, ERK2, CDK5 substrate motif;PKA kinase substrate motif;PKC kinase substrate motif;WW domain binding motif	+	CST;HTP;LTP	+	molecular association, regulation	cell motility, altered	GIT1(DISRUPTS)		activates ERK signaling in response to S1P and fibronectin	1	2.60031e-10	115.38	84.495	115.38	0.28255	8.67102	191260000	277580000	628	NaN	8.67102	Q7TS64;Q99MK8	628;670	Q7TS64	Q7TS64	Beta-adrenergic receptor kinase 1	Adrbk1	QQLVQRVPKMKNKPRSPVVELSKVPLIQRGS	KMKNKPRsPVVELsK
	-0.312957	S	2		___1	b-Adrenergic Receptor kinase substrate motif;Casein kinase II substrate motif;ERK1,2 kinase substrate motif;G protein-coupled receptor kinase 1 substrate motif;GSK3 kinase substrate motif;GSK-3, ERK1, ERK2, CDK5 substrate motif;WW domain binding motif									0.931049	0.00580747	64.454	50.371	64.454	1.0294	7.15409	5687400	8571900	31	NaN	7.15409	Q9D902	31	Q9D902	Q9D902	General transcription factor IIE subunit 2	Gtf2e2	ALSTPVVEKRAVPSESPSSSSSKKKKAKVEH
	-0.312796	S	2		___1	Cdc2 kinase substrate motif;CDK kinase substrate motif;CDK1,2,4,6 kinase substrate motif;ERK1,2 kinase substrate motif;GSK-3, ERK1, ERK2, CDK5 substrate motif;WW domain binding motif									1	1.58809e-17	129.05	129.05	83.758	-0.2183	8.66902	205020000	261660000	11	NaN	8.66902	E9Q5L7;K4DI61	11;11	E9Q5L7	E9Q5L7		Phf10	_____MAAAGPGAALSPGRCDSDPASPGAQS
	-0.312294	S	2		___2	14-3-3 domain binding motif;Akt kinase substrate motif;Calmodulin-dependent protein kinase II substrate motif;Casein kinase II substrate motif;ERK1,2 kinase substrate motif;G protein-coupled receptor kinase 1 substrate motif;GSK-3, ERK1, ERK2, CDK5 substrate motif;MAPKAPK1 kinase substrate motif;PKA kinase substrate motif;PKC kinase substrate motif;WW domain binding motif	+	HTP							1	4.2866e-05	79.886	69.533	44.998	0.46962	8.64419	154910000	285850000	1455	NaN	8.64419	Q8BTI8;Q8BTI8-2;Q8BTI8-3	1455;1359;1455	Q8BTI8	Q8BTI8	Serine/arginine repetitive matrix protein 2	Srrm2	PEPKALPQTPRARSHSPSSPERNNKSVTPQR	tPRARsHsPssPERN
	-0.312294	S	2		___2	Casein kinase II substrate motif;Cdc2 kinase substrate motif;CDK kinase substrate motif;CDK1,2,4,6 kinase substrate motif;ERK1,2 kinase substrate motif;Growth associated histone HI kinase substrate motif;GSK-3, ERK1, ERK2, CDK5 substrate motif;MDC1 BRCT domain binding motif;Plk1 PBD domain binding motif;WW domain binding motif	+	HTP							1	3.59394e-06	121.01	109.79	44.998	0.46962	8.62566	162110000	260230000	1458	NaN	8.62566	Q8BTI8;Q8BTI8-2;Q8BTI8-3	1458;1362;1458	Q8BTI8	Q8BTI8	Serine/arginine repetitive matrix protein 2	Srrm2	KALPQTPRARSHSPSSPERNNKSVTPQRERS	ARsHsPssPERNNKs
	-0.311291	S	3		___1	Casein kinase II substrate motif;MAPKAPK2 kinase substrate motif	+	CST;HTP							1	1.49965e-133	241.04	241.04	72.573	-0.054355	9.94192	3323500000	5424800000	132	NaN	9.94192	P51859;E0CXA0	132;100	P51859	P51859	Hepatoma-derived growth factor	Hdgf	EAHEGDGDKKGSAEGSSDEEGKLVIDEPAKE	kKGsAEGssDEEGKL
	-0.310468	T	3		___1	ERK1,2 kinase substrate motif;G protein-coupled receptor kinase 1 substrate motif;GSK3, Erk1, Erk2 and CDK5 kinase motif;GSK-3, ERK1, ERK2, CDK5 substrate motif;RAF1 kinase substrate motif;WW domain binding motif	+	CST;HTP							0.988012	1.05432e-21	111.64	111.64	111.64	0.65429	8.04458	41800000	69006000	619	NaN	8.04458	Q5SUR0	619	Q5SUR0	Q5SUR0	Phosphoribosylformylglycinamidine synthase	Pfas	RECLVGKTGQGDAPLTPPTPVDLDLDWVLGK	GQGDAPLtPPtPVDL
	-0.310146	S	2		___1	BARD1 BRCT domain binding motif;Casein kinase II substrate motif	+	CST;HTP							0.840021	5.61739e-10	121.13	86.861	117	-1.1669	8.29697	68984000	129160000	95	NaN	8.29697	F8WHU8;Q9D8T7	95;105	F8WHU8	F8WHU8	SRA stem-loop-interacting RNA-binding protein, mitochondrial	Slirp	HVQAQRAKALHGAQTSDEERFLR________	ALHGAQtsDEERFLR
	-0.310039	S	3		___1	b-Adrenergic Receptor kinase substrate motif;Casein kinase II substrate motif;ERK1,2 kinase substrate motif;G protein-coupled receptor kinase 1 substrate motif;GSK-3, ERK1, ERK2, CDK5 substrate motif;WW domain binding motif	+	HTP							0.999584	1.5209e-141	250.25	244.34	222.29	0.8166	8.16758	60290000	86797000	150	NaN	8.16758	F7BP94;Q8QZV7	150;626	F7BP94	F7BP94	Protein asunder homolog	Asun	KEELAEAEVIKDSPDSPEPPNKKPLVETDET	VIKDSPDsPEPPNKK
	-0.309574	S	2		___1	Casein kinase II substrate motif	+	HTP							0.936775	4.12998e-10	98.002	91.499	98.002	0.41259	8.1229	51875000	80837000	344	NaN	8.1229	Q8BPU7;Q8BPU7-3	344;344	Q8BPU7	Q8BPU7	Engulfment and cell motility protein 1	Elmo1	RIAFDAESEPNNSSGSMEKRKSMYTRDYKKL	EPNNSSGsMEKRKSM
	-0.309467	S	2		___2	14-3-3 domain binding motif;Akt kinase substrate motif;Calmodulin-dependent protein kinase II substrate motif;Casein kinase II substrate motif;G protein-coupled receptor kinase 1 substrate motif;GSK3 kinase substrate motif;MAPKAPK1 kinase substrate motif;PKA kinase substrate motif;PKC kinase substrate motif	+	CST;HTP							0.976173	3.04728e-11	126.71	113.52	126.71	-0.17039	8.41979	95245000	167660000	364	NaN	8.41979	H3BKM2;Q80YV2-2;Q80YV2	364;406;406	H3BKM2	H3BKM2	Nuclear-interacting partner of ALK	Zc3hc1	VPSSPLRRTKRARLCSSSSSDTSPRSFFDPT	TKRARLCsssssDts
	-0.308716	S	2		___1	b-Adrenergic Receptor kinase substrate motif;Casein kinase I substrate motif;Casein kinase II substrate motif;G protein-coupled receptor kinase 1 substrate motif;PKA kinase substrate motif;PKC kinase substrate motif	+	HTP							1	3.35577e-48	185.99	173.92	185.99	0.0015232	8.85917	283040000	440020000	183	NaN	8.85917	Q00PI9	183	Q00PI9	Q00PI9	Heterogeneous nuclear ribonucleoprotein U-like protein 2	Hnrnpul2	APGDKAVEEQGDDQDSEKSKPAGSDGERRGV	EQGDDQDsEKsKPAG
	-0.308573	S	2		___1	Casein kinase II substrate motif;G protein-coupled receptor kinase 1 substrate motif;GSK3 kinase substrate motif	+	HTP							0.999996	7.33445e-16	127.32	116.28	127.32	-0.90545	8.89712	315110000	473970000	2	NaN	8.89712	Q99J45;D3YUV1	2;2	Q99J45	Q99J45	Nuclear receptor-binding protein	Nrbp1	______________MSEGESQTVVSSGSDPK	______MsEGESQTV
	-0.307876	S	3		___1	14-3-3 domain binding motif;Akt kinase substrate motif;Calmodulin-dependent protein kinase II substrate motif;Casein kinase II substrate motif;ERK1,2 kinase substrate motif;G protein-coupled receptor kinase 1 substrate motif;GSK-3, ERK1, ERK2, CDK5 substrate motif;MAPKAPK1 kinase substrate motif;MDC1 BRCT domain binding motif;PKA kinase substrate motif;PKC kinase substrate motif;Plk1 PBD domain b…	+	CST;HTP							0.901272	1.36353e-11	133.32	133.32	113.4	-0.41566	9.69327	1853700000	3081100000	401	NaN	9.69327	E9PUK6;E9QKA4;A2A8V9;Q52KI8;A2A8V8;Q52KI8-2	401;401;396;401;401;401	E9PUK6	E9PUK6	Serine/arginine repetitive matrix protein 1	Srrm1	LSPSASPPRRRHRPSSPATPPPKTRHSPTPQ	RRRHRPssPAtPPPK
	-0.306716	S	2		___1	Casein kinase I substrate motif;Casein kinase II substrate motif;G protein-coupled receptor kinase 1 substrate motif;GSK3 kinase substrate motif	+	HTP							0.993559	3.3041e-33	181.75	181.75	153.2	0.10542	9.30136	816280000	1185300000	32	NaN	9.30136	Q99L43;Q6PBC0;A2AMQ5	32;32;15	Q99L43	Q99L43	Phosphatidate cytidylyltransferase 2	Cds2	DKESESEAKLDGETASDSESRAETAPLPTSV	KLDGEtAsDsEsRAE
	-0.306698	T	2		___1	Calmodulin-dependent protein kinase II substrate motif;Casein kinase II substrate motif;GSK-3, ERK1, ERK2, CDK5 substrate motif;PKC kinase substrate motif;WW domain binding motif	+	HTP							0.998955	0.00404496	48.354	48.354	48.354	-0.17597	6.71066	1969400	3167000	315	NaN	6.71066	Q9D219	315	Q9D219	Q9D219	B-cell CLL/lymphoma 9 protein	Bcl9	PDGTGPNSTPNNRAVTPVSQGSNSSSADPKA	TPNNRAVtPVSQGSN
	-0.305949	S	3		___1	DNA dependent Protein kinase substrate motif;ERK1,2 kinase substrate motif;GSK-3, ERK1, ERK2, CDK5 substrate motif;WW domain binding motif	+	HTP							0.994359	0.000728765	60.561	55.701	60.561	-0.6366	7.57904	13468000	24467000	500	NaN	7.57904	Q7TPD0	500	Q7TPD0	Q7TPD0	Integrator complex subunit 3	Ints3	RSMLREKFPEFCSSPSPPVEVKIEEPVSMEM	PEFCssPsPPVEVKI
	-0.30586	S	2		___1	b-Adrenergic Receptor kinase substrate motif;Cdc2 kinase substrate motif;CDK kinase substrate motif;CDK1,2,4,6 kinase substrate motif;ERK1,2 kinase substrate motif;G protein-coupled receptor kinase 1 substrate motif;GSK3 kinase substrate motif;GSK-3, ERK1, ERK2, CDK5 substrate motif;WW domain binding motif	+	HTP							0.938408	1.01843e-18	141.3	116.38	135.38	0.34206	7.96258	27957000	63787000	220	NaN	7.96258	Q9JM73	220	Q9JM73	Q9JM73	Serum response factor	Srf	ETGKALIQTCLNSPDSPPRSDPTTDQRMSAT	TCLNsPDsPPRsDPT
	-0.305164	S	3		___2	Casein kinase I substrate motif;Casein kinase II substrate motif;G protein-coupled receptor kinase 1 substrate motif;GSK3 kinase substrate motif	+	HTP							0.968879	1.75327e-07	64.685	60.495	64.685	0.31331	7.59585	10772000	28661000	643	NaN	7.59585	O54988-2;O54988	643;643	O54988-2	O54988-2	STE20-like serine/threonine-protein kinase	Slk	RATLEQPETDEVEQVSESNSIEELERLVVTG	TDEVEQVsEsNsIEE
	-0.305164	S	3		___2	Casein kinase I substrate motif;Casein kinase II substrate motif;MAPKAPK2 kinase substrate motif	+	HTP							0.980644	1.75327e-07	64.685	60.495	49.43	0.79492	7.59585	10772000	28661000	647	NaN	7.59585	O54988-2;O54988	647;647	O54988-2	O54988-2	STE20-like serine/threonine-protein kinase	Slk	EQPETDEVEQVSESNSIEELERLVVTGAEAR	EQVsEsNsIEELERL
	-0.303793	S	2		___1	b-Adrenergic Receptor kinase substrate motif;ERK1,2 kinase substrate motif;GSK-3, ERK1, ERK2, CDK5 substrate motif;PAK2 kinase substrate motif;PKA kinase substrate motif;PKC kinase substrate motif;WW domain binding motif	+	HTP							1	0.00823666	76.85	49.961	76.85	0.18118	8.27319	77545000	110030000	1266	NaN	8.27319	E9Q2B2;F7C134;E9Q9Y2;Q5RIM6;Q60974-2;Q60974;Q8CHB6;Q3UV08;F7CTX2	1266;269;279;1334;1333;1333;603;982;89	E9Q2B2;Q5RIM6	E9Q2B2	Nuclear receptor corepressor 1	Ncor1	SFEDGLKYPKQIKRESPPIRAFEGAITKGKP	PKQIkREsPPIRAFE
	-0.303454	S	2		___1	Casein kinase II substrate motif;MDC1 BRCT domain binding motif;Plk1 PBD domain binding motif	+	CST;HTP							0.950175	5.56792e-05	100.02	87.667	100.02	-0.55981	7.81562	28344000	37062000	1478	NaN	7.81562	Q8BTI8;Q8BTI8-2;Q8BTI8-3	1478;1382;1478	Q8BTI8	Q8BTI8	Serine/arginine repetitive matrix protein 2	Srrm2	NKSVTPQRERSGSESSVEQKNLARTSPGQRS	ERsGsEssVEQKNLA
	-0.303187	T	2		___2	Casein kinase II substrate motif;G protein-coupled receptor kinase 1 substrate motif;GSK-3, ERK1, ERK2, CDK5 substrate motif;RAF1 kinase substrate motif;WW domain binding motif	+	CST;HTP							0.999936	8.47404e-16	146.1	129.77	141.06	0.5998	9.00937	435390000	586400000	537	NaN	9.00937	Q3UHJ0-2;Q3UHJ0	537;618	Q3UHJ0-2	Q3UHJ0-2	AP2-associated protein kinase 1	Aak1	TTPPPTIQGQKVGSLTPPSSPKTQRAGHRRI	GQKVGsLtPPssPKt
	-0.302582	S	3		___1	Casein kinase II substrate motif;ERK1,2 kinase substrate motif;GSK-3, ERK1, ERK2, CDK5 substrate motif;WW domain binding motif	+	HTP							0.922278	1.04385e-111	213.88	205.21	213.88	-0.22366	8.50184	106750000	210820000	349	NaN	8.50184	P51612	349	P51612	P51612	DNA repair protein complementing XP-C cells homolog	Xpc	TSVEGPGGSSELSSNSPESHNKPTTSRRIKE	SSELSSNsPESHNKP
	-0.302226	S	3		___2	b-Adrenergic Receptor kinase substrate motif;Casein kinase II substrate motif;G protein-coupled receptor kinase 1 substrate motif;Pyruvate dehydrogenase kinase substrate motif									0.988489	0.000171939	58.712	58.712	58.712	-0.99951	7.14255	4782200	9102500	1085	NaN	7.14255	E9PZM4	1085	E9PZM4	E9PZM4		Chd2	LPRIRSSTKKAQTNDSDSDTESKRQAQRSSA
	-0.302226	S	3		___2	b-Adrenergic Receptor kinase substrate motif;Casein kinase I substrate motif;Casein kinase II substrate motif;G protein-coupled receptor kinase 1 substrate motif;GSK3 kinase substrate motif									0.982491	0.000171939	58.712	58.712	58.712	-0.99951	7.14255	4782200	9102500	1087	NaN	7.14255	E9PZM4	1087	E9PZM4	E9PZM4		Chd2	RIRSSTKKAQTNDSDSDTESKRQAQRSSASE
	-0.30171	S	2		___1	Casein kinase II substrate motif;Cdc2 kinase substrate motif;CDK kinase substrate motif;CDK1,2,4,6 kinase substrate motif;ERK1,2 kinase substrate motif;Growth associated histone HI kinase substrate motif;GSK-3, ERK1, ERK2, CDK5 substrate motif;MDC1 BRCT domain binding motif;Plk1 PBD domain binding motif;WW domain binding motif	+	HTP							1	3.59394e-06	121.01	109.79	44.998	0.46962	8.62566	162110000	260230000	1458	NaN	8.62566	Q8BTI8;Q8BTI8-2;Q8BTI8-3	1458;1362;1458	Q8BTI8	Q8BTI8	Serine/arginine repetitive matrix protein 2	Srrm2	KALPQTPRARSHSPSSPERNNKSVTPQRERS	ARsHsPssPERNNKs
	-0.301355	S	2		___2	Casein kinase II substrate motif;G protein-coupled receptor kinase 1 substrate motif;MDC1 BRCT domain binding motif;Plk1 PBD domain binding motif	+	CST;HTP							1	2.26115e-06	105.99	100.26	103.6	-1.2587	7.61246	10955000	30014000	629	NaN	7.61246	Q3UMU9;Q3UMU9-3	629;638	Q3UMU9	Q3UMU9	Hepatoma-derived growth factor-related protein 2	Hdgfrp2	QEDGQDSEDGPRGGSSEELHDSPRDNSDPAK	DGPRGGssEELHDsP
	-0.300306	S	2		___1	b-Adrenergic Receptor kinase substrate motif;Cdc2 kinase substrate motif;CDK kinase substrate motif;CDK1,2,4,6 kinase substrate motif;ERK1,2 kinase substrate motif;Growth associated histone HI kinase substrate motif;GSK-3, ERK1, ERK2, CDK5 substrate motif;MAPKAPK2 kinase substrate motif;PKA kinase substrate motif;PKC kinase substrate motif;WW domain binding motif	+	HTP							0.99988	0.000496875	85.287	85.287	85.287	-0.79857	7.63398	16476000	26575000	212	NaN	7.63398	Q8BQ30;Q8BQ30-2	212;212	Q8BQ30	Q8BQ30	Phostensin	Ppp1r18	ETPEESLRLAGSGDDSPKRKEVLESILSPGE	LAGsGDDsPKRKEVL
	-0.299489	S	2		___1	14-3-3 domain binding motif;Akt kinase substrate motif;Calmodulin-dependent protein kinase II substrate motif;Casein kinase II substrate motif;G protein-coupled receptor kinase 1 substrate motif;MAPKAPK1 kinase substrate motif;MAPKAPK2 kinase substrate motif;PKA kinase substrate motif;PKC kinase substrate motif	+	HTP							1	3.89798e-10	138.35	138.35	109.83	0.11079	10.3909	8521000000	16075000000	189	NaN	10.3909	Q62093	189	Q62093	Q62093	Serine/arginine-rich splicing factor 2	Srsf2	SSVSRSRSRSRSRSRSRSPPPVSKRESKSRS	RSRSRsRsRsPPPVs
	-0.299294	S	3		___1	14-3-3 domain binding motif;Akt kinase substrate motif;Calmodulin-dependent protein kinase II substrate motif;G protein-coupled receptor kinase 1 substrate motif;GSK3 kinase substrate motif;MAPKAPK1 kinase substrate motif;PKA kinase substrate motif;PKC epsilon kinase substrate motif;PKC kinase substrate motif	+	CST;HTP							0.999963	0.00121485	59.248	42.036	59.248	0.13478	7.5787	15593000	22312000	450	NaN	7.5787	Q3UMU9;Q3UMU9-3;Q3UMU9-4;Q3UMU9-2	450;459;397;449	Q3UMU9;Q3UMU9-4	Q3UMU9	Hepatoma-derived growth factor-related protein 2	Hdgfrp2	KPRARPVKVERTRKRSEGLSLERKGEKKKEP	VERTRKRsEGLsLER
	-0.298886	S	2		___1	ERK1,2 kinase substrate motif;Growth associated histone HI kinase substrate motif;GSK-3, ERK1, ERK2, CDK5 substrate motif;PKA kinase substrate motif;PKC kinase substrate motif;WW domain binding motif	+	HTP							0.97797	0.000658486	81.803	59.775	81.803	-0.35126	8.42005	96332000	166730000	363	NaN	8.42005	Q9JMK2	363	Q9JMK2	Q9JMK2	Casein kinase I isoform epsilon	Csnk1e	VASTPASRIQQTGNTSPRAISRADRERKVSM	IQQTGNTsPRAISRA
	-0.298868	S	4		___1	Casein kinase I substrate motif;ERK1,2 kinase substrate motif;GSK-3, ERK1, ERK2, CDK5 substrate motif;PKA kinase substrate motif;PKC kinase substrate motif;WW domain binding motif	+	HTP							0.997542	1.04824e-57	159.75	146.67	159.75	-1.901	8.48457	106610000	198580000	307	NaN	8.48457	Q99KN9-2;Q5SUH7;Q99KN9;Q5SUH6	307;299;307;299	Q99KN9-2	Q99KN9-2	Clathrin interactor 1	Clint1	TIDLGAAAHYTGDKASPDQNASTHTPQSSAK	HYTGDKAsPDQNAst
	-0.29885	S	2		___2	Casein kinase II substrate motif;ERK1,2 kinase substrate motif;G protein-coupled receptor kinase 1 substrate motif;GSK-3, ERK1, ERK2, CDK5 substrate motif;PKA kinase substrate motif;PKC kinase substrate motif;WW domain binding motif	+	HTP							0.999642	1.42129e-27	140.35	134.73	140.35	0.99247	9.31911	780720000	1304300000	335	NaN	9.31911	F6RJ39;Q9JIX8-4;Q9JIX8;B8JJ89	335;349;389;243	F6RJ39	F6RJ39	Apoptotic chromatin condensation inducer in the nucleus	Acin1	ENEVKSSQSLEEKSQSPSPPPLPEDLEKAPV	sLEEKsQsPsPPPLP
	-0.29885	S	2		___2	DNA dependent Protein kinase substrate motif;ERK1,2 kinase substrate motif;GSK-3, ERK1, ERK2, CDK5 substrate motif;MAPKAPK2 kinase substrate motif;WW domain binding motif	+	HTP							1	1.37082e-20	132.76	132.76	132.76	0.15978	8.98025	372540000	583020000	337	NaN	8.98025	F6RJ39;Q9JIX8-4;Q9JIX8;B8JJ89	337;351;391;245	F6RJ39	F6RJ39	Apoptotic chromatin condensation inducer in the nucleus	Acin1	EVKSSQSLEEKSQSPSPPPLPEDLEKAPVVL	EEKsQsPsPPPLPED
	-0.297679	S	2		___1	Casein kinase II substrate motif;ERK1,2 kinase substrate motif;G protein-coupled receptor kinase 1 substrate motif;Growth associated histone HI kinase substrate motif;GSK-3, ERK1, ERK2, CDK5 substrate motif;WW domain binding motif									1	0.0179197	49.448	38.284	49.448	-0.76769	6.87015	3876000	3539600	66	NaN	6.87015	P47810	66	P47810	P47810	Wee1-like protein kinase	Wee1	DSAFQEPDSPLPSARSPAEAEAERRRRSPGA
	-0.296935	S	3		___1	b-Adrenergic Receptor kinase substrate motif;Casein kinase II substrate motif;PKA kinase substrate motif;PKC kinase substrate motif	+	HTP							0.999983	4.01822e-96	235.37	235.37	149.52	0.31665	8.89424	330720000	453150000	89	NaN	8.89424	Q7TPM0;Q9CYJ8;P83917	89;89;89	Q7TPM0	Q7TPM0	Chromobox protein homolog 1	Cbx1	AHETDKSEGGKRKADSDSEDKGEESKPKKKK	GGkRKADsDsEDKGE
	-0.296793	S	3		___1	ERK1,2 kinase substrate motif;G protein-coupled receptor kinase 1 substrate motif;Growth associated histone HI kinase substrate motif;GSK-3, ERK1, ERK2, CDK5 substrate motif;PKA kinase substrate motif;PKC kinase substrate motif;WW domain binding motif	+	CST;HTP							1	1.57098e-35	134.99	134.99	134.99	1.1571	8.42005	94052000	169010000	827	NaN	8.42005	Q68FL6;E9QB02;F6W0G8	827;835;109	Q68FL6	Q68FL6	Methionine--tRNA ligase, cytoplasmic	Mars	IENLRQRFGGGQAKGSPKPAAVEAVTAAGSQ	GGGQAKGsPKPAAVE
	-0.296474	S	3		___2	Casein kinase II substrate motif	+	HTP							0.999755	2.17451e-25	121.7	117	62.781	-0.26835	8.77316	194130000	399010000	526	NaN	8.77316	Q3UPL0	526	Q3UPL0	Q3UPL0	Protein transport protein Sec31A	Sec31a	DGPDVALKDSDQVAQSDGEESPAAEEQLLGE	DsDQVAQsDGEEsPA
	-0.296474	S	3		___2	b-Adrenergic Receptor kinase substrate motif;ERK1,2 kinase substrate motif;GSK-3, ERK1, ERK2, CDK5 substrate motif;WW domain binding motif	+	HTP							0.999799	2.49786e-07	62.781	61.996	62.781	-0.26835	7.25537	7224400	10779000	531	NaN	7.25537	Q3UPL0	531	Q3UPL0	Q3UPL0	Protein transport protein Sec31A	Sec31a	ALKDSDQVAQSDGEESPAAEEQLLGERIKEE	AQsDGEEsPAAEEQL
	-0.294049	S	3		___2	Casein kinase I substrate motif;G protein-coupled receptor kinase 1 substrate motif	+	CST;HTP							1	4.19303e-14	109.54	109.54	97.593	1.1317	8.40357	91424000	161840000	254	NaN	8.40357	Q64012-2;Q64012;A2AU62	254;270;270	Q64012-2	Q64012-2	RNA-binding protein Raly	Raly	CSSSSRLPAPQEDTASEAGTPQGEVQTRDDG	APQEDtAsEAGtPQG
	-0.293748	T	3		___2	Casein kinase I substrate motif;GSK-3, ERK1, ERK2, CDK5 substrate motif;MAPKAPK2 kinase substrate motif;WW domain binding motif	+	CST;HTP							0.999999	1.05321e-116	237.33	194.54	109.54	-0.13795	9.60892	1449800000	2614000000	258	NaN	9.60892	Q64012-2;Q64012;A2AU62	258;274;274	Q64012-2	Q64012-2	RNA-binding protein Raly	Raly	SRLPAPQEDTASEAGTPQGEVQTRDDGDEEG	DtAsEAGtPQGEVQt
	-0.293589	S	2		___1	14-3-3 domain binding motif;AMP-activated protein kinase substrate motif;b-Adrenergic Receptor kinase substrate motif;Calmodulin-dependent protein kinase I substrate motif;Calmodulin-dependent protein kinase II substrate motif;Calmodulin-dependent protein kinase IV substrate motif;Casein kinase II substrate motif;Chk1 kinase substrate motif;HMGCoA Reductase kinase substrate motif;PKA kinase subst…	+	CST;HTP							0.993265	1.19428e-81	222.11	222.11	169.06	0.40808	9.22583	677950000	1004000000	867	NaN	9.22583	Q640N3-2;E9QMX7;Q640N3	867;867;875	Q640N3-2	Q640N3-2	Rho GTPase-activating protein 30	Arhgap30	GALSEGPGVELLRVDSTEEINEQTSEMKQAP	VELLRVDstEEINEQ
	-0.293288	S	3		___1	G protein-coupled receptor kinase 1 substrate motif;GSK3 kinase substrate motif;MDC1 BRCT domain binding motif;Plk1 PBD domain binding motif	+	HTP							0.900316	2.99055e-30	103.24	103.24	100.81	0.75982	8.11912	55689000	75873000	368	NaN	8.11912	Q64337	368	Q64337	Q64337	Sequestosome-1	Sqstm1	GELQSLQMPESEGPSSLDPSQEGPTGLKEAA	PEsEGPssLDPsQEG
	-0.291945	S	3		___1	Casein kinase II substrate motif;ERK1,2 kinase substrate motif;GSK-3, ERK1, ERK2, CDK5 substrate motif;WW domain binding motif	+	HTP							1	3.46093e-106	237.73	237.73	203.64	0.41251	9.9364	3455100000	5182500000	366	NaN	9.9364	D3YXK2;S4R1M2;Q80YR5	366;366;387	D3YXK2;Q80YR5	D3YXK2	Scaffold attachment factor B1;Scaffold attachment factor B2	Safb;Safb2	EATSQELVRAPTAALSPEPQDSKEDVKKFAF	RAPtAALsPEPQDsK	ERK2
	-0.291875	S	3		___1	ERK1,2 kinase substrate motif;Growth associated histone HI kinase substrate motif;GSK-3, ERK1, ERK2, CDK5 substrate motif;PAK2 kinase substrate motif;Pim1 kinase substrate sequence;PKA kinase substrate motif;PKC kinase substrate motif;WW domain binding motif	+	HTP							1	1.17538e-36	171.35	162.09	171.35	1.3137	8.85415	402860000	311880000	11	NaN	8.85415	B1AUQ7;Z4YJH1;Q9R1K9	11;11;20	B1AUQ7	B1AUQ7	Centrin-2	Cetn2	_____MASSAQRKRMSPKPELTEDQKQEIRE	SAQRKRMsPKPELtE
	-0.291345	S	2		___1	Casein kinase II substrate motif;Cdc2 kinase substrate motif;CDK kinase substrate motif;CDK1,2,4,6 kinase substrate motif;ERK1,2 kinase substrate motif;G protein-coupled receptor kinase 1 substrate motif;GSK-3, ERK1, ERK2, CDK5 substrate motif;WW domain binding motif	+	CST;HTP							0.865982	9.35343e-06	114.24	66.938	84.352	0.46271	8.61243	179120000	230540000	530	NaN	8.61243	Q0P678;H3BIW0;G3X8T2;H3BJN4	530;554;554;69	Q0P678	Q0P678	Zinc finger CCCH domain-containing protein 18	Zc3h18	WRRSKSPKKKLGVSVSPSRARRRRKTSASSA	KKLGVsVsPsRARRR
	-0.290127	S	2		___1	Casein kinase II substrate motif;ERK1,2 kinase substrate motif;Growth associated histone HI kinase substrate motif;GSK-3, ERK1, ERK2, CDK5 substrate motif;PKA kinase substrate motif;PKC kinase substrate motif;Pyruvate dehydrogenase kinase substrate motif;WW domain binding motif	+	CST;HTP							0.999997	0.023264	83.647	23.628	83.647	-0.043402	8.91866	340630000	488580000	205	NaN	8.91866	Q91VM5;Q9WV02;S4R1F6;Q9WV02-2;A2AFI3	205;208;80;208;208	Q91VM5	Q91VM5	RNA binding motif protein, X-linked-like-1;RNA-binding motif protein, X chromosome;RNA-binding motif protein, X chromosome, N-terminally processed	Rbmxl1;Rbmx	PPRREPLPSRRDVYLSPRDDGYSTKDSYSSR	SRRDVyLsPRDDGys
	-0.289386	S	2		___1	14-3-3 domain binding motif;Aurora-A kinase substrate motif;Calmodulin-dependent protein kinase II substrate motif;Casein kinase II substrate motif;PAK2 kinase substrate motif;Phosphorylase kinase substrate motif;PKA kinase substrate motif;PKC epsilon kinase substrate motif;PKC kinase substrate motif;Pyruvate dehydrogenase kinase substrate motif									0.987578	0.000602396	67.118	58.893	67.118	-1.2384	8.07882	48529000	71369000	420	NaN	8.07882	A2A484;Q3UH28;Q3U1M7;A2A483;E9Q8D1;A2A482;E9Q8D3;A2A480;A2A481;A2A485	429;400;420;425;445;400;417;420;400;420	A2A484;A2A485	A2A485		Zmynd8	LLSKPLLSGGAGRRISLSDMPRSPTSTNSSV
	-0.288576	S	2		___1	Casein kinase I substrate motif;Casein kinase II substrate motif;G protein-coupled receptor kinase 1 substrate motif	+	HTP							0.999974	5.44262e-61	197.1	182.84	150.91	0.027595	9.17394	614510000	878050000	18	NaN	9.17394	P28352;F6QA74;D3Z124;D3Z6R9	18;13;18;18	P28352	P28352	DNA-(apurinic or apyrimidinic site) lyase;DNA-(apurinic or apyrimidinic site) lyase, mitochondrial	Apex1	KRGKKAAADDGEEPKSEPETKKSKGAAKKTE	DDGEEPKsEPEtKKS
	-0.287783	S	3		___1	ERK1,2 kinase substrate motif;Growth associated histone HI kinase substrate motif;GSK-3, ERK1, ERK2, CDK5 substrate motif;PKA kinase substrate motif;PKC kinase substrate motif;WW domain binding motif	+	CST;HTP							0.910474	3.60566e-15	114.39	111.36	99.078	0.076082	8.10836	52334000	76001000	113	NaN	8.10836	Q9DBN4-2;D3Z1F7;Q9DBN4	113;164;183	Q9DBN4-2	Q9DBN4-2	Putative monooxygenase p33MONOX	P33monox;4833439L19Rik	HPASAQSTPSSTPHASPKQKSRGWFPSGSST	PsstPHAsPKQKSRG
	-0.28773	T	2		___1	AMP-activated protein kinase substrate motif;Calmodulin-dependent protein kinase II substrate motif;ERK1,2 kinase substrate motif;Growth associated histone HI kinase substrate motif;GSK3, Erk1, Erk2 and CDK5 kinase motif;GSK-3, ERK1, ERK2, CDK5 substrate motif;PKC kinase substrate motif;WW domain binding motif	+	CST;HTP							1	0.0331874	87.476	46.028	87.476	-0.2269	9.03338	434910000	644970000	262	NaN	9.03338	Q9D5V6	262	Q9D5V6	Q9D5V6	Synapse-associated protein 1	Syap1	NRDDNLPLTEAVRPKTPPVVIKSQLKSQEDE	tEAVRPKtPPVVIKS
	-0.287413	S	3		___1	ERK1,2 kinase substrate motif;Growth associated histone HI kinase substrate motif;GSK-3, ERK1, ERK2, CDK5 substrate motif;WW domain binding motif	+	HTP							0.993629	8.20509e-64	183.49	175.46	127.2	-0.85443	8.6563	156620000	296600000	301	NaN	8.6563	H3BKM2;Q80YV2-2;Q80YV2	301;343;343	H3BKM2	H3BKM2	Nuclear-interacting partner of ALK	Zc3hc1	SQDATVSPGSEQSEKSPGPIVSRTRSWESSS	GsEQsEKsPGPIVsR
	-0.286287	S	2		___2	14-3-3 domain binding motif;Akt kinase substrate motif;Calmodulin-dependent protein kinase II substrate motif;Casein kinase II substrate motif;MAPKAPK1 kinase substrate motif;MAPKAPK2 kinase substrate motif;PKA kinase substrate motif;PKC kinase substrate motif	+	CST;HTP							0.999989	0.000555347	71.692	24.118	70.68	0.054157	7.95968	35366000	55768000	133	NaN	7.95968	Q3TFP0;Q9R0U0-3;Q9R0U0-2;Q9R0U0	133;133;133;133	Q3TFP0	Q3TFP0	Serine/arginine-rich splicing factor 10	Srsf10	RSRSRSYERRRSRSRSFDYNYRRSYSPRNRP	RRRsRsRsFDYNYRR
	-0.286287	S	2		___2	14-3-3 domain binding motif;Akt kinase substrate motif;Calmodulin-dependent protein kinase II substrate motif;Casein kinase II substrate motif;MAPKAPK1 kinase substrate motif;PKA kinase substrate motif;PKC kinase substrate motif;ZIP kinase substrate motif	+	HTP							0.999989	0.000555347	70.68	61.024	70.68	0.054157	7.5143	14055000	18626000	131	NaN	7.5143	Q3TFP0;Q9R0U0-3;Q9R0U0-2;Q9R0U0	131;131;131;131	Q3TFP0	Q3TFP0	Serine/arginine-rich splicing factor 10	Srsf10	YRRSRSRSYERRRSRSRSFDYNYRRSYSPRN	YERRRsRsRsFDYNY
	-0.286269	S	2		___1	Casein kinase II substrate motif;G protein-coupled receptor kinase 1 substrate motif;MAPKAPK2 kinase substrate motif;PKA kinase substrate motif;PKC kinase substrate motif	+	CST;HTP							1	4.74868e-05	80.738	74.04	71.08	0.67313	7.65585	22001000	23272000	1832	NaN	7.65585	B2RY04	1832	B2RY04	B2RY04	Dedicator of cytokinesis protein 5	Dock5	PPPPKSKPYESSQRNSAEIAPPLPVRRDSKA	YESSQRNsAEIAPPL
	-0.285882	S	3		___1	Cdc2 kinase substrate motif;CDK kinase substrate motif;CDK1,2,4,6 kinase substrate motif;ERK1, ERK2, SAPK, CDK5 and GSK3 kinase substrate motif;ERK1,2 kinase substrate motif;G protein-coupled receptor kinase 1 substrate motif;Growth associated histone HI kinase substrate motif;GSK-3, ERK1, ERK2, CDK5 substrate motif;WW domain binding motif	+	CST;HTP							1	5.29994e-69	188.39	165.8	123.95	0.24006	9.28407	830490000	1092900000	996	NaN	9.28407	Q9JL26-2;A2AB60;Q9JL26;G3UWI1	996;1021;1021;78	Q9JL26-2	Q9JL26-2	Formin-like protein 1	Fmnl1	AAADTSGREEPPTPKSPPKARRQQMDLISEL	EEPPtPKsPPKARRQ
	-0.28437	S	2		___1	b-Adrenergic Receptor kinase substrate motif;Casein kinase II substrate motif	+	HTP							1	3.55952e-59	180.86	180.86	167.41	0.12088	9.37793	919910000	1467500000	27	NaN	9.37793	Q3UM45;F6TGJ2	27;12	Q3UM45	Q3UM45	Protein phosphatase 1 regulatory subunit 7	Ppp1r7	SQEMMEVDRRVESEESGDEEGKKHGGGGIVA	RRVEsEEsGDEEGKK
	-0.283878	S	2		___2	Casein kinase II substrate motif;DNA dependent Protein kinase substrate motif;MAPKAPK2 kinase substrate motif	+	HTP							1	0.000752532	66.393	59.13	44.998	0.46962	8.49925	105430000	210250000	1457	NaN	8.49925	Q8BTI8;Q8BTI8-2;Q8BTI8-3	1457;1361;1457	Q8BTI8	Q8BTI8	Serine/arginine repetitive matrix protein 2	Srrm2	PKALPQTPRARSHSPSSPERNNKSVTPQRER	RARsHsPssPERNNK
	-0.283615	S	3		___1	Akt kinase substrate motif;Casein kinase II substrate motif;Cdc2 kinase substrate motif;CDK kinase substrate motif;CDK1,2,4,6 kinase substrate motif;ERK1,2 kinase substrate motif;Growth associated histone HI kinase substrate motif;GSK-3, ERK1, ERK2, CDK5 substrate motif;PKA kinase substrate motif;PKC kinase substrate motif;WW domain binding motif									0.967531	0.00124898	90.434	55.741	90.434	-0.77986	7.40623	8703000	16779000	249	NaN	7.40623	Q8VE97;Q542V3;A2A837	249;249;254	Q8VE97	Q8VE97	Serine/arginine-rich splicing factor 4	Srsf4	SRSQSRSRSKKEKSRSPSKDNKSRSRSRSPD
	-0.283509	S	3		___1	Calmodulin-dependent protein kinase II substrate motif;Chk1 kinase substrate motif;ERK1,2 kinase substrate motif;G protein-coupled receptor kinase 1 substrate motif;Growth associated histone HI kinase substrate motif;GSK3 kinase substrate motif;GSK-3, ERK1, ERK2, CDK5 substrate motif;PKA kinase substrate motif;PKC kinase substrate motif;WW domain binding motif	+	HTP							0.980259	3.94419e-72	206.45	184.01	132.25	0.31949	9.70264	2015100000	3027300000	456	NaN	9.70264	P55194;A2A5V4;A2A5V3;A2A5V2;S4R2D3	456;535;535;535;535	P55194	P55194	SH3 domain-binding protein 1	Sh3bp1	MAVRERTEADLPKPTSPKVSRNPTETAASAE	ADLPKPtsPKVSRNP
	-0.28279	S	3		___2	Casein kinase II substrate motif;PKA kinase substrate motif;PKC kinase substrate motif	+	HTP							1	3.87311e-09	89.055	89.055	89.055	0.084093	7.82294	28569000	37949000	1281	NaN	7.82294	Q8VDD9;F8VQ93	1281;1281	Q8VDD9	Q8VDD9	PH-interacting protein	Phip	YNIIPLYNSMKKKVLSDSEEEEKDADVPGTS	SMKKKVLsDsEEEEK
	-0.28279	S	3		___2	b-Adrenergic Receptor kinase substrate motif;BARD1 BRCT domain binding motif;Casein kinase II substrate motif;G protein-coupled receptor kinase 1 substrate motif	+	HTP							0.999999	3.87311e-09	89.055	89.055	89.055	0.084093	7.82294	28569000	37949000	1283	NaN	7.82294	Q8VDD9;F8VQ93	1283;1283	Q8VDD9	Q8VDD9	PH-interacting protein	Phip	IIPLYNSMKKKVLSDSEEEEKDADVPGTSTR	KKKVLsDsEEEEKDA
	-0.28214	S	3		___1	ERK1,2 kinase substrate motif;Growth associated histone HI kinase substrate motif;GSK-3, ERK1, ERK2, CDK5 substrate motif;WW domain binding motif	+	CST;HTP							1	2.73243e-56	185.23	185.23	185.23	0.12608	9.48561	1309500000	1749700000	261	NaN	9.48561	Q3TQI7	261	Q3TQI7	Q3TQI7	Uncharacterized protein C9orf78 homolog		RPLRVGDTEKPEPERSPPNRKRPANEKATDD	EKPEPERsPPNRKRP
	-0.281106	S	3		___1	Casein kinase II substrate motif;Cdc2 kinase substrate motif;CDK kinase substrate motif;CDK1,2,4,6 kinase substrate motif;ERK1,2 kinase substrate motif;GSK-3, ERK1, ERK2, CDK5 substrate motif;WW domain binding motif	+	HTP							0.97843	0.000859414	48.51	48.51	48.51	0.55624	7.32621	9231200	11963000	2554	NaN	7.32621	E9Q6J5	2554	E9Q6J5	E9Q6J5		Bod1l	LPTKSDHSGTWTSEGSPEKMGHVAGARQSFH	GTWTSEGsPEKMGHV
	-0.280212	T	3		___1	b-Adrenergic Receptor kinase substrate motif;Casein kinase II substrate motif;MAPKAPK2 kinase substrate motif	+	CST;HTP							0.751092	5.40641e-09	99.392	87.684	56.783	-0.52565	7.88158	29605000	46529000	62	NaN	7.88158	Q0P678;H3BIW0;G3X8T2;Q0P678-2;H3BKL4	62;62;62;62;62	Q0P678	Q0P678	Zinc finger CCCH domain-containing protein 18	Zc3h18	LEEEENATRVQSQEETRSDEEDRASEPKSQD	RVQsQEEtRsDEEDR
	-0.279144	S	3		___1	Casein kinase II substrate motif;ERK1,2 kinase substrate motif;Growth associated histone HI kinase substrate motif;GSK-3, ERK1, ERK2, CDK5 substrate motif;WW domain binding motif	+	HTP							0.969096	1.03388e-10	110.32	110.32	110.32	-0.33618	8.54163	128340000	219700000	983	NaN	8.54163	Q6ZPR6-2;Q6ZPR6	983;1084	Q6ZPR6-2	Q6ZPR6-2	Inhibitor of Bruton tyrosine kinase	Ibtk	IPPPCTREDVKPWEKSPTTKSAPQFIPSNRV	DVKPWEKsPttKSAP
	-0.279021	S	2		___1	ERK1,2 kinase substrate motif;GSK-3, ERK1, ERK2, CDK5 substrate motif;WW domain binding motif	+	HTP							1	0.0238188	52.966	46.062	48.351	-1.13	7.97421	37268000	56966000	799	NaN	7.97421	Q80T85	799	Q80T85	Q80T85	DDB1- and CUL4-associated factor 5	Dcaf5	ALSKALSSRAEEPPASPGPKASGSTLNSASG	RAEEPPAsPGPKASG
	-0.277796	S	3		___1	b-Adrenergic Receptor kinase substrate motif;ERK1,2 kinase substrate motif;GSK-3, ERK1, ERK2, CDK5 substrate motif;WW domain binding motif	+	HTP							0.979885	1.11808e-55	172.74	161.17	172.74	0.53227	8.17064	66925000	81202000	734	NaN	8.17064	P35831	734	P35831	P35831	Tyrosine-protein phosphatase non-receptor type 12	Ptpn12	EKHDAGGIHTEASADSPPAFSDKKDQITKSP	HTEAsADsPPAFSDK
	-0.276905	T	2		___1	GSK-3, ERK1, ERK2, CDK5 substrate motif;WW domain binding motif	+	HTP							0.999995	0.000305416	73.918	66.395	73.918	-0.43248	7.60494	12587000	27679000	264	NaN	7.60494	Q3V113;Q80V76	264;301	Q3V113	Q3V113		Pygo2	NQPSFPPSSSGRGGGTPDANSLAPPGKAGGG	SSGRGGGtPDANSLA
	-0.276503	S	3		___2	14-3-3 domain binding motif;Calmodulin-dependent protein kinase II substrate motif;Casein kinase II substrate motif;ERK1,2 kinase substrate motif;G protein-coupled receptor kinase 1 substrate motif;GSK-3, ERK1, ERK2, CDK5 substrate motif;PKA kinase substrate motif;PKC kinase substrate motif;WW domain binding motif	+	CST;HTP							0.975303	7.69113e-26	136.71	131.18	109.59	0.92038	8.95219	340230000	555510000	234	NaN	8.95219	Q8BR65	234	Q8BR65	Q8BR65	Sin3 histone deacetylase corepressor complex component SDS3	Suds3	DLRTLNKLKSPKRPASPSSPEHLPATPAESP	KsPKRPAsPssPEHL
	-0.275489	S	2		___1	b-Adrenergic Receptor kinase substrate motif;Casein kinase I substrate motif;Casein kinase II substrate motif;ERK1,2 kinase substrate motif;GSK-3, ERK1, ERK2, CDK5 substrate motif;MAPKAPK2 kinase substrate motif;Pyruvate dehydrogenase kinase substrate motif;WW domain binding motif	+	HTP							0.991362	0.00260332	42.633	39.665	41.513	-0.25421	7.29892	6616100	13287000	297	NaN	7.29892	O88622-2;G3X8U8;O88622	297;297;297	O88622-2	O88622-2	Poly(ADP-ribose) glycohydrolase	Parg	SLGDSPPFEKESEPESPMDVDNSKNSCQDSE	EKEsEPEsPMDVDNS
	-0.275315	S	3		___1	Casein kinase II substrate motif;ERK1,2 kinase substrate motif;GSK-3, ERK1, ERK2, CDK5 substrate motif;MAPKAPK2 kinase substrate motif;PKA kinase substrate motif;PKC kinase substrate motif;WW domain binding motif	+	HTP							0.999993	1.43638e-36	174.4	161.3	174.4	0.069696	8.31423	85280000	120890000	2050	NaN	8.31423	E9Q2B2;F7C134;E9Q9Y2;Q5RIM6;Q60974-2;Q60974;Q8CHB6	2050;1053;1063;2117;2116;2116;1387	E9Q2B2;Q5RIM6	E9Q2B2	Nuclear receptor corepressor 1	Ncor1	ALSSTPVRTKTSSRYSPESQSQTVLHPRPGP	TKTSSRYsPESQSQT
	-0.274983	S	3		___1	Casein kinase I substrate motif;ERK1,2 kinase substrate motif;GSK-3, ERK1, ERK2, CDK5 substrate motif;PKA kinase substrate motif;WW domain binding motif	+	CST;HTP							0.999342	1.46684e-81	187.11	187.11	187.11	0.19918	9.0197	378250000	668130000	216	NaN	9.0197	Q3UZA1;Q3UZA1-2	216;186	Q3UZA1;Q3UZA1-2	Q3UZA1	CapZ-interacting protein	Rcsd1	ENGDDVFASKSKDPGSPQLNQEAMADGVEGT	SKSKDPGsPQLNQEA
	-0.274355	Y	3		___1	EGFR kinase substrate motif;Src kinase substrate motif;TC-PTP phosphatase substrate motif									0.999962	5.92907e-07	48.655	48.655	48.655	0.073619	8.68236	141060000	340190000	13	NaN	8.68236	Q8VDW0;D6RHT5	13;13	Q8VDW0	Q8VDW0	ATP-dependent RNA helicase DDX39A	Ddx39a;Ddx39	___MAEQDVENELLDYDEDEEPQAPQESTPA
	-0.274337	S	3		___1	14-3-3 domain binding motif;Calmodulin-dependent protein kinase II substrate motif;Casein kinase II substrate motif;PKA kinase substrate motif;PKC kinase substrate motif	+	CST;HTP							0.966756	3.41327e-55	168.92	157.78	168.92	1.1692	8.256	62407000	117890000	1495	NaN	8.256	Q8BTI8;Q8BTI8-2;Q8BTI8-3	1495;1399;1495	Q8BTI8	Q8BTI8	Serine/arginine repetitive matrix protein 2	Srrm2	EQKNLARTSPGQRSRSGSSQELDGKPSASPQ	sPGQRsRsGssQELd
	-0.27425	S	2		___1	14-3-3 domain binding motif;AMP-activated protein kinase substrate motif;Calmodulin-dependent protein kinase I substrate motif;Calmodulin-dependent protein kinase II substrate motif;Calmodulin-dependent protein kinase IV substrate motif;Chk1 kinase substrate motif;PKA kinase substrate motif;PKC kinase substrate motif;ZIP kinase substrate motif	+	CST;HTP							1	0.0100709	82.417	60.847	66.056	-0.27951	8.27407	72093000	115870000	15	NaN	8.27407	Q9D7P6;D3Z7W0;D6RE47	15;15;15	Q9D7P6	Q9D7P6	Iron-sulfur cluster assembly enzyme ISCU, mitochondrial	Iscu	_MAAATGAGRLRRAASALLLRSPRLPARELS	GRLRRAAsALLLRsP
	-0.272245	S	3		___1	Casein kinase II substrate motif;ERK1,2 kinase substrate motif;G protein-coupled receptor kinase 1 substrate motif;Growth associated histone HI kinase substrate motif;GSK-3, ERK1, ERK2, CDK5 substrate motif;MAPKAPK2 kinase substrate motif;WW domain binding motif	+	CST;HTP							0.999699	2.17992e-83	200.52	200.52	200.52	1.0472	8.78964	214100000	401990000	418	NaN	8.78964	A2RSJ4	418	A2RSJ4	A2RSJ4	UHRF1-binding protein 1-like	Uhrf1bp1l	LKQAMKDRNLGSPPKSPTHASPQHTQTEKDS	NLGsPPKsPtHAsPQ
	-0.270713	S	3		___1	Casein kinase I substrate motif;ERK1,2 kinase substrate motif;GSK-3, ERK1, ERK2, CDK5 substrate motif;PKA kinase substrate motif;PKC kinase substrate motif;WW domain binding motif	+	HTP							0.999988	1.55359e-18	133.86	120.16	133.86	0.24799	8.52612	142830000	193000000	52	NaN	8.52612	G3X9K3;D3YYK9	52;52	G3X9K3	G3X9K3	Brefeldin A-inhibited guanine nucleotide-exchange protein 1	Arfgef1	CEVALEEIKVETEKQSPPHGEAKAGSGTLPP	KVETEKQsPPHGEAK
	-0.270278	T	2		___1	Calmodulin-dependent protein kinase II substrate motif;PAK2 kinase substrate motif;Pim1 kinase substrate sequence;PKA kinase substrate motif;PKC kinase substrate motif;ZIP kinase substrate motif	+	CST;HTP							0.870256	8.70709e-52	183.24	165.89	183.24	-0.12656	7.79428	15938000	46332000	21	NaN	7.79428	Q3UYV9	21	Q3UYV9	Q3UYV9	Nuclear cap-binding protein subunit 1	Ncbp1	HSYENDGGQPHKRRKTSDANETEDHLESLIC	QPHkRRKtsDANEtE
	-0.270243	S	2		___2	b-Adrenergic Receptor kinase substrate motif;Casein kinase II substrate motif	+	CST;HTP							1	1.18309e-45	171.08	162.32	126.42	0.28045	8.94527	277580000	604020000	116	NaN	8.94527	Q9CQU1	116	Q9CQU1	Q9CQU1	Microfibrillar-associated protein 1	Mfap1	LARHRKIVEPEVVGESDSEVEGDAWRLERED	EPEVVGEsDsEVEGD
	-0.270243	S	2		___2	b-Adrenergic Receptor kinase substrate motif;Casein kinase I substrate motif;Casein kinase II substrate motif;G protein-coupled receptor kinase 1 substrate motif	+	CST;HTP							1	7.54681e-20	126.42	117.35	126.42	0.28045	8.4353	98226000	174230000	118	NaN	8.4353	Q9CQU1	118	Q9CQU1	Q9CQU1	Microfibrillar-associated protein 1	Mfap1	RHRKIVEPEVVGESDSEVEGDAWRLEREDSS	EVVGEsDsEVEGDAW
	-0.270017	S	2		___2	14-3-3 domain binding motif;Akt kinase substrate motif;Calmodulin-dependent protein kinase II substrate motif;Casein kinase II substrate motif;G protein-coupled receptor kinase 1 substrate motif;MAPKAPK1 kinase substrate motif;MAPKAPK2 kinase substrate motif;PKA kinase substrate motif;PKC kinase substrate motif	+	CST;HTP							0.988555	3.87236e-05	72.583	60.379	72.583	-0.38259	7.74282	26646000	28665000	487	NaN	7.74282	O54781	487	O54781	O54781	SRSF protein kinase 2;SRSF protein kinase 2 N-terminal;SRSF protein kinase 2 C-terminal	Srpk2	EQEESSPSHDRSRTVSASSTGDLPKTKTRAA	HDRsRtVsAsstGDL
	-0.269773	S	2		___1	14-3-3 domain binding motif;AMP-activated protein kinase substrate motif;b-Adrenergic Receptor kinase substrate motif;Calmodulin-dependent protein kinase I substrate motif;Calmodulin-dependent protein kinase II alpha substrate motif;Calmodulin-dependent protein kinase II substrate motif;Calmodulin-dependent protein kinase IV substrate motif;Casein kinase II substrate motif;Chk1 kinase substrate m…	+	CST;HTP							0.999999	0.000166283	118.03	86.399	118.03	-0.2974	8.63853	164600000	270440000	617	NaN	8.63853	Q60875-5;H3BJU7;Q60875-4;H3BJX8;H3BJ45;H3BJ40;H3BKH9;Q60875	617;617;619;629;629;631;644;646	Q60875-5	Q60875-5	Rho guanine nucleotide exchange factor 2	Arhgef2	GMPPPALPRGLFRLESFESLRGERLLKDALR	RGLFRLEsFEsLRGE
	-0.268886	S	3		___1	ERK1,2 kinase substrate motif;GSK-3, ERK1, ERK2, CDK5 substrate motif;MDC1 BRCT domain binding motif;Plk1 PBD domain binding motif;WW domain binding motif	+	HTP							0.926177	8.08172e-10	85.002	81.925	85.002	1.2005	8.14476	51159000	88397000	739	NaN	8.14476	Q7TSI3	739	Q7TSI3	Q7TSI3	Serine/threonine-protein phosphatase 6 regulatory subunit 1	Ppp6r1	PVSKEADMSSIQIPSSPPAHGSPQLRSQDPT	ssIQIPssPPAHGsP
	-0.267687	S	2		___1	BARD1 BRCT domain binding motif;Casein kinase II substrate motif	+	HTP							1	0.000152169	95.822	83.903	56.25	0.21199	8.16471	59697000	86423000	7	NaN	8.16471	Q61233;D3YZ25;D3YVW8;D3Z7D9;D3Z311	7;7;7;7;7	Q61233	Q61233	Plastin-2	Lcp1	_________MARGSVSDEEMMELREAFAKVD	_MARGsVsDEEMMEL
	-0.267184	S	3		___3	ERK1,2 kinase substrate motif;GSK-3, ERK1, ERK2, CDK5 substrate motif;MAPKAPK2 kinase substrate motif;MDC1 BRCT domain binding motif;Plk1 PBD domain binding motif;WW domain binding motif	+	HTP							0.881095	7.05241e-08	87.61	83.224	87.61	0.045451	7.80611	24643000	39347000	127	NaN	7.80611	Q3UZA1;Q3UZA1-2	127;97	Q3UZA1;Q3UZA1-2	Q3UZA1	CapZ-interacting protein	Rcsd1	KAIVSPFHSPPSTPSSPGIRSHPSEAEEVPV	sPPstPssPGIRSHP
	-0.267045	S	2		___1		+	HTP							0.861267	5.49486e-06	90.379	84.655	90.379	-1.8696	8.38516	93664000	149090000	239	NaN	8.38516	Q80XK6;Q80XK6-5	239;239	Q80XK6	Q80XK6	Autophagy-related protein 2 homolog B	Atg2b	SGVSLFWDEFSASAKSSPVCSTAPVETEPKL	EFSASAKssPVCSTA
	-0.265067	S	2		___1	Casein kinase I substrate motif;Cdc2 kinase substrate motif;CDK kinase substrate motif;CDK1,2,4,6 kinase substrate motif;ERK1,2 kinase substrate motif;G protein-coupled receptor kinase 1 substrate motif;GSK-3, ERK1, ERK2, CDK5 substrate motif;WW domain binding motif	+	HTP							1	1.04826e-32	168.47	168.47	106.6	0.2473	8.20118	59262000	99660000	893	NaN	8.20118	Q6ZPJ3	893	Q6ZPJ3	Q6ZPJ3	Ubiquitin-conjugating enzyme E2 O	Ube2o	AVPDTERKEEKPEVQSPVKAEWPSETPVLCQ	EEKPEVQsPVKAEWP
	-0.264963	S	3		___1	ATM kinase substrate motif;Casein kinase II substrate motif;DNA dependent Protein kinase substrate motif;MDC1 BRCT domain binding motif;Plk1 PBD domain binding motif	+	HTP							0.848068	5.24533e-07	82.773	82.773	62.052	-0.15496	7.99084	35989000	61925000	1498	NaN	7.99084	Q8BTI8;Q8BTI8-2;Q8BTI8-3	1498;1402;1498	Q8BTI8	Q8BTI8	Serine/arginine repetitive matrix protein 2	Srrm2	NLARTSPGQRSRSGSSQELDGKPSASPQERS	QRsRsGssQELdGKP
	-0.264374	S	2		___2	Casein kinase I substrate motif;Casein kinase II substrate motif;Pyruvate dehydrogenase kinase substrate motif	+	HTP							1	0.000921048	57.288	48.707	57.288	0.20351	8.02735	41662000	64843000	737	NaN	8.02735	Q8CCP0-2;Q8CCP0	737;737	Q8CCP0-2	Q8CCP0-2	Nuclear export mediator factor Nemf	Nemf	VDQEDIAVHSGRDELSSEDGEAKAVTKDQEP	HSGRDELssEDGEAK
	-0.264374	S	2		___2	Casein kinase I substrate motif;G protein-coupled receptor kinase 1 substrate motif;MDC1 BRCT domain binding motif;Plk1 PBD domain binding motif	+	HTP							1	0.000921048	57.288	48.707	57.288	0.20351	7.97669	37272000	57501000	738	NaN	7.97669	Q8CCP0-2;Q8CCP0	738;738	Q8CCP0-2	Q8CCP0-2	Nuclear export mediator factor Nemf	Nemf	DQEDIAVHSGRDELSSEDGEAKAVTKDQEPI	SGRDELssEDGEAKA
	-0.263923	S	2		___2	ERK1,2 kinase substrate motif;GSK-3, ERK1, ERK2, CDK5 substrate motif;MDC1 BRCT domain binding motif;Plk1 PBD domain binding motif;WW domain binding motif	+	CST;HTP							0.940397	2.83867e-06	98.543	89.261	98.543	-2.4101	6.80932	2687800	3758700	222	NaN	6.80932	F6R8S6;Q9D1F4;E9QKI5;E9QKI4	222;213;239;284	F6R8S6	F6R8S6	Proline-rich AKT1 substrate 1	Akt1s1	RTEARSSDEENGPPSSPDLDRIAASMRALVL	EENGPPssPDLDRIA
	-0.263785	S	2		___1	Casein kinase II substrate motif;PKA kinase substrate motif;PKC kinase substrate motif;Pyruvate dehydrogenase kinase substrate motif	+	CST;HTP							0.966382	0.0366022	52.814	36.949	52.814	-2.2282	7.33494	11254000	10370000	617	NaN	7.33494	B9EHJ3;P39447	617;617	B9EHJ3	B9EHJ3	Tight junction protein ZO-1	Tjp1	WRFRGLRSSKRNLRKSREDLSAQPVQTKFPA	SKRNLRKsREDLsAQ
	-0.262884	S	2		___1	14-3-3 domain binding motif;Calmodulin-dependent protein kinase II substrate motif;Calmodulin-dependent protein kinase IV substrate motif;Casein kinase II substrate motif;Chk1 kinase substrate motif;MAPKAPK1 kinase substrate motif;PAK2 kinase substrate motif;Pim1 kinase substrate sequence;PKA kinase substrate motif;PKC epsilon kinase substrate motif;PKC kinase substrate motif;ZIP kinase substrate…	+	CST;HTP							0.9976	9.76218e-38	166.91	159.3	148.53	0.12331	8.80043	231440000	400140000	14	NaN	8.80043	E9Q667;F7DCS9;E9Q6I9;Q4FJU9;E9QN39	14;27;104;129;170	E9Q667	E9Q667	Transmembrane protein 40	Tmem40	__MVPTGESGLRRRGSGSAEGEVEASQLRRL	SGLRRRGsGsAEGEV
	-0.262625	S	2		___1	Cdc2 kinase substrate motif;CDK kinase substrate motif;CDK1,2,4,6 kinase substrate motif;ERK1,2 kinase substrate motif;Growth associated histone HI kinase substrate motif;GSK-3, ERK1, ERK2, CDK5 substrate motif;MAPKAPK2 kinase substrate motif;PKA kinase substrate motif;PKC kinase substrate motif;WW domain binding motif	+	HTP							0.999707	0.0395964	59.198	46.21	59.198	-0.58648	7.95303	34540000	55210000	251	NaN	7.95303	Q8R149-2;Q8R149	251;251	Q8R149-2	Q8R149-2	BUD13 homolog	Bud13	DASPPRKSHRNSSAVSPRRGHHGSLGTSSPR	HRNSsAVsPRRGHHG
	-0.262538	S	2		___1	BARD1 BRCT domain binding motif;Casein kinase I substrate motif;Casein kinase II substrate motif;G protein-coupled receptor kinase 1 substrate motif;MDC1 BRCT domain binding motif;Plk1 PBD domain binding motif	+	HTP							0.962529	1.42781e-19	126.07	114.96	97.502	-1.3383	7.78226	30799000	29771000	274	NaN	7.78226	D3Z6P4;Q6NZJ5;E9Q3I8;E9Q3I9;E9Q3I4;Q9Z0R4-2;E9Q3I5;Q9Z0R4;E9Q0N0	274;335;335;335;298;335;335;335;335	D3Z6P4	D3Z6P4	Intersectin-1	Itsn1	ISSSSVDQRLPEEPSSEDEQQPEKKLPVTFE	RLPEEPssEDEQQPE
	-0.262157	S	3		___1	b-Adrenergic Receptor kinase substrate motif;BARD1 BRCT domain binding motif;Casein kinase I substrate motif;Casein kinase II substrate motif;MAPKAPK2 kinase substrate motif;PKA kinase substrate motif;PKC kinase substrate motif	+	HTP							0.984338	6.15628e-12	119.37	83.828	119.37	0.26302	8.13223	56276000	79314000	545	NaN	8.13223	F8VPQ2;E9Q9V1	545;223	F8VPQ2	F8VPQ2		Arid4a	NKEKKIKKPEDSERDSDEEEEKSQEREETES	PEDsERDsDEEEEKS
	-0.262019	S	2		___1	Casein kinase II substrate motif;ERK1,2 kinase substrate motif;G protein-coupled receptor kinase 1 substrate motif;GSK-3, ERK1, ERK2, CDK5 substrate motif;WW domain binding motif	+	HTP							1	5.83815e-100	224.83	224.83	205.26	-0.88704	9.17336	603100000	887550000	657	NaN	9.17336	Q1HFZ0-2;H3BKN0;Q1HFZ0	657;688;723	Q1HFZ0-2	Q1HFZ0-2	tRNA (cytosine(34)-C(5))-methyltransferase	Nsun2	EKKKEGVILTNENAASPEQPGDEDAKQTAQD	LtNENAAsPEQPGDE
	-0.261812	S	2		___2	Casein kinase II substrate motif;ERK1,2 kinase substrate motif;GSK-3, ERK1, ERK2, CDK5 substrate motif;PKA kinase substrate motif;PKC kinase substrate motif;WW domain binding motif	+	CST;HTP							0.999999	0.000145725	98.233	85.992	98.233	-0.66584	9.01808	385790000	656710000	1825	NaN	9.01808	Q8BTI8;Q8BTI8-2;Q8BTI8-3	1825;1729;1825	Q8BTI8	Q8BTI8	Serine/arginine repetitive matrix protein 2	Srrm2	SRTSPAPWKRSRSRASPATHRRSRSRTPLIS	KRsRsRAsPAtHRRs
	-0.261812	S	3		___2	14-3-3 domain binding motif;Calmodulin-dependent protein kinase II substrate motif;Casein kinase II substrate motif;G protein-coupled receptor kinase 1 substrate motif;PKA kinase substrate motif;PKC kinase substrate motif;ZIP kinase substrate motif	+	HTP							0.999641	0.00561481	41.825	34.534	41.825	-0.22072	7.37952	10778000	13184000	1822	NaN	7.37952	Q8BTI8;Q8BTI8-2;Q8BTI8-3	1822;1726;1822	Q8BTI8	Q8BTI8	Serine/arginine repetitive matrix protein 2	Srrm2	RSRSRTSPAPWKRSRSRASPATHRRSRSRTP	APWKRsRsRAsPAtH
	-0.261396	S	2		___1	Casein kinase II substrate motif;ERK1,2 kinase substrate motif;GSK-3, ERK1, ERK2, CDK5 substrate motif;WW domain binding motif	+	HTP							0.999215	1.58498e-17	143.93	135.52	138.55	-1.251	8.93151	342350000	511750000	332	NaN	8.93151	Q3THK7	332	Q3THK7	Q3THK7	GMP synthase [glutamine-hydrolyzing]	Gmps	RTPRKRISKTLNMTTSPEEKRKIIGDTFVKI	KTLNMTtsPEEKRKI
	-0.260895	S	2		___1	Casein kinase II substrate motif;ERK1,2 kinase substrate motif;G protein-coupled receptor kinase 1 substrate motif;GSK-3, ERK1, ERK2, CDK5 substrate motif;WW domain binding motif	+	HTP							0.976767	1.11914e-08	115.74	75.832	106.7	-0.34722	7.89055	29818000	47905000	1195	NaN	7.89055	P30415	1195	P30415	P30415	NK-tumor recognition protein;Putative peptidyl-prolyl cis-trans isomerase	Nktr	LGESGVKQDSSTSVTSPVETSGKKEGAEKSQ	DSSTSVTsPVETSGK
	-0.260446	S	3		___1	b-Adrenergic Receptor kinase substrate motif;BARD1 BRCT domain binding motif;Casein kinase II substrate motif	+	HTP							0.999907	2.32694e-05	57.613	53.988	56.483	-4.4376	7.42144	8348000	18042000	540	NaN	7.42144	Q8BXN9;Q8BXN9-2;A2AQJ5;A2AQJ6	540;541;544;545	Q8BXN9	Q8BXN9	Transmembrane protein 87A	Tmem87a	VPSSVTDVALPALLDSDEERMITHFERSKME	ALPALLDsDEERMIT
	-0.260411	S	3		___1	b-Adrenergic Receptor kinase substrate motif;Casein kinase I substrate motif;Casein kinase II substrate motif;ERK1,2 kinase substrate motif;G protein-coupled receptor kinase 1 substrate motif;GSK-3, ERK1, ERK2, CDK5 substrate motif;WW domain binding motif	+	HTP							0.997973	1.81851e-32	133.98	125.35	133.98	0.11714	8.58457	174970000	209240000	9	NaN	8.58457	Q9CWX9;D3YWF9	9;9	Q9CWX9	Q9CWX9	Probable ATP-dependent RNA helicase DDX47	Ddx47	_______MAADEEPDSPSGALQTAAEEEETK	AADEEPDsPsGALQT
	-0.260186	S	2		___1	14-3-3 domain binding motif;Calmodulin-dependent protein kinase II substrate motif;Phosphorylase kinase substrate motif;Pim1 kinase substrate sequence;PKA kinase substrate motif;PKC epsilon kinase substrate motif;PKC kinase substrate motif	+	HTP							0.999999	1.18037e-05	81.01	67.61	81.01	0.35538	7.93592	32167000	54114000	748	NaN	7.93592	Q6NZC7;G3X928	748;748	Q6NZC7	Q6NZC7	SEC23-interacting protein	Sec23ip	MASPSSESNESKRKLSVGAYVSSVRVDYESF	NESKRKLsVGAYVSS
	-0.257804	S	2		___1	14-3-3 domain binding motif;Calmodulin-dependent protein kinase II substrate motif;Casein kinase II substrate motif;G protein-coupled receptor kinase 1 substrate motif;GSK3 kinase substrate motif;PKA kinase substrate motif;PKC kinase substrate motif	+	HTP							0.999445	6.35015e-05	98.406	85.616	86.288	0.56164	7.80451	28997000	34756000	307	NaN	7.80451	Q8R361	307	Q8R361	Q8R361	Rab11 family-interacting protein 5	Rab11fip5	DSIQSPKLLTHKRTYSDEASQLRAAPPRALL	LTHKRtysDEAsQLR	NDR1
	-0.256907	S	2		___1	Casein kinase I substrate motif;ERK1,2 kinase substrate motif;GSK-3, ERK1, ERK2, CDK5 substrate motif;WW domain binding motif	+	CST;HTP							1	2.06948e-23	159.65	159.65	129.29	-0.39101	8.57505	153700000	222180000	1839	NaN	8.57505	Q9QY81;F6XGN0	1839;1052	Q9QY81	Q9QY81	Nuclear pore membrane glycoprotein 210	Nup210	TIIAYHTVCAPRELASPLALTPRASPQHSPH	CAPRELAsPLALtPR
	-0.25689	S	2		___1	14-3-3 domain binding motif;Akt kinase substrate motif;Calmodulin-dependent protein kinase II substrate motif;Casein kinase II substrate motif;G protein-coupled receptor kinase 1 substrate motif;GSK3 kinase substrate motif;MAPKAPK1 kinase substrate motif;PKA kinase substrate motif;PKC kinase substrate motif	+	CST;HTP							0.999972	0.000176968	112.84	102.37	112.84	1.3745	7.34725	9128100	13118000	254	NaN	7.34725	Q99PM9	254	Q99PM9	Q99PM9	Uridine-cytidine kinase 2	Uck2	NGYLNGYTPSRKRQASESSSRPH________	PSRKRQAsEsSSRPH
	-0.256873	S	2		___1	14-3-3 domain binding motif;Calmodulin-dependent protein kinase II substrate motif;Casein kinase II substrate motif;ERK1,2 kinase substrate motif;G protein-coupled receptor kinase 1 substrate motif;Growth associated histone HI kinase substrate motif;GSK-3, ERK1, ERK2, CDK5 substrate motif;PKA kinase substrate motif;PKC kinase substrate motif;WW domain binding motif									0.933103	0.00760389	78.136	23.025	78.136	-0.062944	7.44706	9670600	18323000	713	NaN	7.44706	D3Z079;F6WXQ4	713;72	D3Z079	D3Z079		Stxbp5	CDITEGTVVPEDRCKSPTSAKMSRKLSLPTD
	-0.256718	S	2		___1	Casein kinase II substrate motif;ERK1,2 kinase substrate motif;GSK-3, ERK1, ERK2, CDK5 substrate motif;WW domain binding motif	+	CST;HTP							0.980425	9.12341e-07	121.21	104.74	114.87	0.075845	8.21299	61851000	101450000	1217	NaN	8.21299	F8VQE2;E9Q0A4;Q9QXL1	1217;1217;1217	F8VQE2	F8VQE2	Kinesin-like protein KIF21B	Kif21b	RGSTFPRQSRGATDTSPLTRRKSYDRGQPIR	SRGATDTsPLtRRKS
	-0.254771	S	2		___1	ERK1,2 kinase substrate motif;G protein-coupled receptor kinase 1 substrate motif;GSK-3, ERK1, ERK2, CDK5 substrate motif;PKA kinase substrate motif;PKC kinase substrate motif;WW domain binding motif	+	HTP							0.999999	0.000239513	70.837	67.869	70.837	0.41137	7.5704	14782000	22406000	4410	NaN	7.5704	Q6PDK2	4410	Q6PDK2	Q6PDK2	Histone-lysine N-methyltransferase 2D	Kmt2d	PKPQGPALELPPGRVSPAAAQLADTFFGKGL	ELPPGRVsPAAAQLA
	-0.254754	T	4		___1	Casein kinase II substrate motif;G protein-coupled receptor kinase 1 substrate motif;GSK-3, ERK1, ERK2, CDK5 substrate motif;PKA kinase substrate motif;PKC kinase substrate motif;WW domain binding motif	+	HTP							0.778185	2.80054e-24	94.985	93.036	94.985	-0.14671	7.76007	16487000	41066000	1647	NaN	7.76007	P97789-2;P97789;F8VQ87	1647;1660;1664	P97789-2	P97789-2	5'-3' exoribonuclease 1	Xrn1	PLQTNKPGSSEATKMTPQESPPASSSSSQAA	SSEATKMtPQEsPPA
	-0.254427	S	3		___1	Casein kinase II substrate motif;Cdc2 kinase substrate motif;CDK kinase substrate motif;CDK1,2,4,6 kinase substrate motif;ERK1,2 kinase substrate motif;GSK-3, ERK1, ERK2, CDK5 substrate motif;WW domain binding motif	+	HTP							1	1.53918e-05	86.738	76.083	86.738	-0.82824	8.3868	91418000	152250000	867	NaN	8.3868	F8VPQ2	867	F8VPQ2	F8VPQ2		Arid4a	YEKEKKLKRKILGQQSPEKKLRLDNGMEMTT	RKILGQQsPEKKLRL
	-0.254014	S	3		___1	Casein kinase I substrate motif;Cdc2 kinase substrate motif;CDK kinase substrate motif;CDK1,2,4,6 kinase substrate motif;ERK1,2 kinase substrate motif;Growth associated histone HI kinase substrate motif;GSK-3, ERK1, ERK2, CDK5 substrate motif;WW domain binding motif	+	CST;HTP							0.999771	7.3554e-07	109.72	91.999	109.72	0.38559	8.14863	54734000	86079000	1675	NaN	8.14863	A2AU91;A2AU89;P70399;P70399-3;P70399-2;F6ZRL3	1675;1625;1663;1619;720;144	A2AU91	A2AU91	Tumor suppressor p53-binding protein 1	Trp53bp1;Tp53bp1	VPSGKRKLPTSEEERSPAKRGRKSATVKPGT	PTSEEERsPAKRGRK
	-0.253825	S	3		___1	Cdc2 kinase substrate motif;CDK kinase substrate motif;CDK1,2,4,6 kinase substrate motif;ERK1,2 kinase substrate motif;Growth associated histone HI kinase substrate motif;GSK-3, ERK1, ERK2, CDK5 substrate motif;PKA kinase substrate motif;PKC kinase substrate motif;WW domain binding motif	+	CST;HTP							0.999998	4.68018e-41	141.76	139.33	119.15	-0.56916	8.34236	69493000	150470000	268	NaN	8.34236	Q9CY50	268	Q9CY50	Q9CY50	Translocon-associated protein subunit alpha	Ssr1	MSWIPQETLNQINKASPRRQPRKRAQKRSVG	LNQINKAsPRRQPRK
	-0.25281	T	2		___1	Akt kinase substrate motif;Calmodulin-dependent protein kinase II substrate motif;Cdc2 kinase substrate motif;CDK1,2,4,6 kinase substrate motif;CDK5 kinase substrate motif;GSK-3, ERK1, ERK2, CDK5 substrate motif;PKC kinase substrate motif;WW domain binding motif	+	HTP							0.999798	0.000283176	93.478	93.478	93.478	-0.089124	8.17243	65126000	83616000	109	NaN	8.17243	P06745	109	P06745	P06745	Glucose-6-phosphate isomerase	Gpi	ENRAVLHVALRNRSNTPIKVDGKDVMPEVNR	ALRNRSNtPIkVDGk
	-0.252398	S	3		___1	Casein kinase II substrate motif	+	CST;HTP							0.982978	1.47064e-16	127.3	106.92	127.3	-2.2421	8.03755	37233000	71794000	117	NaN	8.03755	P70452	117	P70452	P70452	Syntaxin-4	Stx4	KAIEPQKEEADENYNSVNTRMKKTQHGVLSQ	EADENyNsVNTRMKK
	-0.252226	S	4		___2	14-3-3 domain binding motif;Calmodulin-dependent protein kinase II substrate motif;Calmodulin-dependent protein kinase IV substrate motif;Casein kinase II substrate motif;Chk1 kinase substrate motif;ERK1,2 kinase substrate motif;G protein-coupled receptor kinase 1 substrate motif;Growth associated histone HI kinase substrate motif;GSK-3, ERK1, ERK2, CDK5 substrate motif;PKA kinase substrate motif…	+	HTP							0.999858	2.94656e-24	128.06	128.06	116.38	-1.4445	9.06711	453130000	714000000	185	NaN	9.06711	P97360;E9Q8J8	185;96	P97360	P97360	Transcription factor ETV6	Etv6	VHHNPPTIELLHRPRSPITTNHRPSPDPEQQ	ELLHRPRsPIttNHR
	-0.252037	S	3		___2	14-3-3 domain binding motif;Calmodulin-dependent protein kinase II substrate motif;Casein kinase II substrate motif;ERK1,2 kinase substrate motif;G protein-coupled receptor kinase 1 substrate motif;Growth associated histone HI kinase substrate motif;GSK-3, ERK1, ERK2, CDK5 substrate motif;MAPKAPK1 kinase substrate motif;PAK2 kinase substrate motif;Pim1 kinase substrate sequence;PKA kinase substra…	+	CST;HTP							1	4.65509e-22	132.39	132.39	73.688	0.40239	9.82628	2703400000	3999800000	572	NaN	9.82628	E9PUK6;E9QKA4;A2A8V9;Q52KI8;A2A8V8;Q52KI8-2;F6UK16	572;572;567;572;558;572;18	E9PUK6	E9PUK6	Serine/arginine repetitive matrix protein 1	Srrm1	RRRRSPSPPPARRRRSPSPAPPPPPPPPPPR	PPARRRRsPsPAPPP
	-0.252037	S	3		___2	14-3-3 domain binding motif;Akt kinase substrate motif;Calmodulin-dependent protein kinase II substrate motif;DNA dependent Protein kinase substrate motif;ERK1,2 kinase substrate motif;G protein-coupled receptor kinase 1 substrate motif;GSK-3, ERK1, ERK2, CDK5 substrate motif;MAPKAPK1 kinase substrate motif;PKA kinase substrate motif;PKC kinase substrate motif;WW domain binding motif;ZIP kinase s…	+	CST;HTP							1	4.65509e-22	132.39	132.39	73.688	0.40239	9.7612	2345900000	3424400000	574	NaN	9.7612	E9PUK6;E9QKA4;A2A8V9;Q52KI8;A2A8V8;Q52KI8-2;F6UK16	574;574;569;574;560;574;20	E9PUK6	E9PUK6	Serine/arginine repetitive matrix protein 1	Srrm1	RRSPSPPPARRRRSPSPAPPPPPPPPPPRRR	ARRRRsPsPAPPPPP
	-0.250715	S	2		___2	14-3-3 domain binding motif;Akt kinase substrate motif;Calmodulin-dependent protein kinase II substrate motif;Casein kinase II substrate motif;G protein-coupled receptor kinase 1 substrate motif;MAPKAPK1 kinase substrate motif;PKA kinase substrate motif;PKC kinase substrate motif	+	CST;HTP							1	1.19074e-124	250.27	236.68	84.166	0.092869	9.04446	478140000	629630000	253	NaN	9.04446	Q05CL8	253	Q05CL8	Q05CL8	La-related protein 7	Larp7	SSSGVCKATKRPRTASEGSEAETPEAPKQPA	TKRPRtAsEGsEAEt
	-0.249839	S	2		___2	Casein kinase I substrate motif;DNA dependent Protein kinase substrate motif;ERK1,2 kinase substrate motif;GSK-3, ERK1, ERK2, CDK5 substrate motif;WW domain binding motif	+	HTP							0.999999	1.3662e-09	100.43	92.816	100.43	0.65248	8.87914	457620000	299460000	9	NaN	8.87914	Q3UIR3;Q3UIR3-2	9;9	Q3UIR3	Q3UIR3	E3 ubiquitin-protein ligase DTX3L	Dtx3l	_______MASSPDPPSPLLVRLRESIPKAHR	ASsPDPPsPLLVRLR
	-0.249702	S	2		___1	14-3-3 domain binding motif;AMP-activated protein kinase substrate motif;Calmodulin-dependent protein kinase I substrate motif;Calmodulin-dependent protein kinase II alpha substrate motif;Calmodulin-dependent protein kinase II substrate motif;Calmodulin-dependent protein kinase IV substrate motif;Casein kinase II substrate motif;Chk1 kinase substrate motif;HMGCoA Reductase kinase substrate motif;…	+	CST;HTP							0.999385	5.56792e-05	100.02	86.837	85.554	0.27305	8.82426	262420000	404790000	253	NaN	8.82426	Q6NZR5	253	Q6NZR5	Q6NZR5		Skiv2l	NASPSPSGTPLVRASSLEDLVLKEAATVVST	TPLVRAssLEDLVLK
	-0.248845	S	2		___1	Casein kinase II substrate motif;MAPKAPK2 kinase substrate motif	+	CST;HTP							0.996731	3.62011e-42	194.2	179.7	171.51	-0.14829	8.18628	58933000	94630000	1537	NaN	8.18628	Q8BTI8;Q8BTI8-2;Q8BTI8-3	1537;1441;1537	Q8BTI8	Q8BTI8	Serine/arginine repetitive matrix protein 2	Srrm2	KPKTRTPLRQRSHSGSSPEVDSKSRHSPRLS	RQRsHsGssPEVDSK
	-0.248194	S	3		___1	Casein kinase II substrate motif;ERK1,2 kinase substrate motif;G protein-coupled receptor kinase 1 substrate motif;GSK-3, ERK1, ERK2, CDK5 substrate motif;Pyruvate dehydrogenase kinase substrate motif;WW domain binding motif	+	CST;HTP							0.904105	7.29736e-24	86.566	86.566	86.566	-0.39171	8.80119	255940000	376750000	166	NaN	8.80119	F6YB25;Q9CSU0;Q9CSU0-3;Q9CSU0-2	66;166;166;166	F6YB25;Q9CSU0	Q9CSU0	Regulation of nuclear pre-mRNA domain-containing protein 1B	Rprd1b	QQIQEEEDDDYPGSYSPQDPSAGPLLTEELI	DDYPGsysPQDPSAG
	-0.246789	S	3		___1	ERK1,2 kinase substrate motif;GSK-3, ERK1, ERK2, CDK5 substrate motif;WW domain binding motif	+	HTP							0.999999	2.87265e-83	197.54	197.54	162.61	-0.66317	8.06551	40260000	76016000	1627	NaN	8.06551	Q6PDK2	1627	Q6PDK2	Q6PDK2	Histone-lysine N-methyltransferase 2D	Kmt2d	GVEQMECEIKLEGPASPDVELGKEETEESKK	IKLEGPAsPDVELGK
	-0.246721	S	3		___1	ERK1,2 kinase substrate motif;G protein-coupled receptor kinase 1 substrate motif;GSK-3, ERK1, ERK2, CDK5 substrate motif;MAPKAPK2 kinase substrate motif;WW domain binding motif	+	HTP							0.987022	1.76836e-13	91.603	88.675	91.603	0.084701	7.94917	39310000	49644000	45	NaN	7.94917	Q9D1L0;D3Z5B1;B2RPU8	45;24;45	Q9D1L0	Q9D1L0	Coiled-coil-helix-coiled-coil-helix domain-containing protein 2, mitochondrial	Chchd2;2410018M08Rik	PAAQPPAAAAPSAVGSPAAAPRQPGLMAQMA	AAPsAVGsPAAAPRQ
	-0.246584	S	3		___1	Casein kinase II substrate motif;PKA kinase substrate motif	+	HTP							1	1.52914e-05	86.803	71.005	86.803	-0.12486	8.56343	142980000	222980000	191	NaN	8.56343	Q00PI9	191	Q00PI9	Q00PI9	Heterogeneous nuclear ribonucleoprotein U-like protein 2	Hnrnpul2	EQGDDQDSEKSKPAGSDGERRGVKRQRDEKD	EKsKPAGsDGERRGV
	-0.246532	Y	2	+	___1	ALK kinase substrate motif	+	CST;HTP;LTP							0.999971	2.06554e-20	166.19	157.18	166.19	-0.057445	9.54644	1953400000	1565800000	354	9.54496	7.07831	Q9QZR5-3;O88904-3;Q9QZR5-4;O88904-2;Q9QZR5-2;E9Q1Q8;Q9QZR5;O88904	354;352;354;352;361;352;361;352	Q9QZR5-3	Q9QZR5-3	Homeodomain-interacting protein kinase 2;Homeodomain-interacting protein kinase 1	Hipk2;Hipk1	DFGSASHVSKAVCSTYLQSRYYR________	SKAVCStyLQsRYYR
	-0.246481	S	2		___1	14-3-3 domain binding motif;Akt kinase substrate motif;Calmodulin-dependent protein kinase II substrate motif;MAPKAPK1 kinase substrate motif;PKA kinase substrate motif;PKC kinase substrate motif	+	CST;HTP							0.999968	1.11408e-31	178.15	178.15	162.93	-0.40401	8.63816	173020000	261640000	301	NaN	8.63816	Q8BGU5-2;Q8BGU5	301;326	Q8BGU5-2	Q8BGU5-2	Cyclin-Y	Ccny	DKYKDLRKPMRKRSASADNLILPRWSPAIIS	PMRKRsAsADNLILP
	-0.246207	S	3		___1	Casein kinase II substrate motif;ERK1,2 kinase substrate motif;GSK-3, ERK1, ERK2, CDK5 substrate motif;WW domain binding motif	+	CST;HTP							1	1.90823e-101	211.87	205.27	124.29	-0.1675	8.62498	138700000	282970000	92	NaN	8.62498	Q0P678;H3BIW0;G3X8T2;Q0P678-2	92;92;92;92	Q0P678	Q0P678	Zinc finger CCCH domain-containing protein 18	Zc3h18	DQDSEAHELSRGPAGSPCEEGDDVEEDGTSD	LSRGPAGsPCEEGDD
	-0.245831	S	3		___2	Casein kinase II substrate motif	+	HTP							0.999996	3.48125e-28	116.51	107.33	116.51	-0.088545	8.32346	58806000	151790000	875	NaN	8.32346	P51612	875	P51612	P51612	DNA repair protein complementing XP-C cells homolog	Xpc	AKSEAAAPHAAGGGLSSDEEEGTSSQAEAAR	HAAGGGLssDEEEGT
	-0.245831	S	3		___2	BARD1 BRCT domain binding motif;Casein kinase II substrate motif;MDC1 BRCT domain binding motif;Plk1 PBD domain binding motif	+	HTP							0.999996	3.48125e-28	116.51	107.33	116.51	-0.088545	8.32346	58806000	151790000	876	NaN	8.32346	P51612	876	P51612	P51612	DNA repair protein complementing XP-C cells homolog	Xpc	KSEAAAPHAAGGGLSSDEEEGTSSQAEAARV	AAGGGLssDEEEGTS
	-0.244822	S	2		___1	Casein kinase II substrate motif;DNA dependent Protein kinase substrate motif;ERK1,2 kinase substrate motif;GSK-3, ERK1, ERK2, CDK5 substrate motif;PKA kinase substrate motif;PKC kinase substrate motif;WW domain binding motif	+	CST;HTP							0.999987	5.17536e-06	92.109	76.595	92.109	0.0061393	9.60442	1489500000	2532300000	349	NaN	9.60442	Q8BTI8;Q8BTI8-2;Q8BTI8-3	349;253;349	Q8BTI8	Q8BTI8	Serine/arginine repetitive matrix protein 2	Srrm2	PYEDKDKKEKSAVRPSPSPERSSTGPELPAP	EKsAVRPsPsPERSS
	-0.243557	S	3		___2	Casein kinase II substrate motif;G protein-coupled receptor kinase 1 substrate motif;GSK3 kinase substrate motif	+	HTP							0.981153	2.26361e-44	138.35	138.35	110.89	0.22698	8.5504	137100000	218040000	26	NaN	8.5504	Q62318;Q62318-2	26;26	Q62318	Q62318	Transcription intermediary factor 1-beta	Trim28	ASAATAASAASGSPGSGEGSAGGEKRPAASS	AAsGsPGsGEGsAGG
	-0.242396	S	2		___1	ERK1,2 kinase substrate motif;Growth associated histone HI kinase substrate motif;GSK-3, ERK1, ERK2, CDK5 substrate motif;PKA kinase substrate motif;PKC kinase substrate motif;WW domain binding motif	+	CST;HTP							0.991183	5.22644e-05	100.73	100.73	96.866	-0.70186	9.81896	2641000000	3950200000	94	NaN	9.81896	Q61823	94	Q61823	Q61823	Programmed cell death protein 4	Pdcd4	DNGSEAVRSGVAVPTSPKGRLLDRRSRSGKG	SGVAVPtsPKGRLLD
	-0.24214	S	3		___1	ERK1,2 kinase substrate motif;GSK-3, ERK1, ERK2, CDK5 substrate motif;PKA kinase substrate motif;PKC kinase substrate motif;WW domain binding motif	+	HTP	+		transcription, inhibited				0.922474	1.46627e-10	110.4	87.469	98.562	0.96113	7.90027	31681000	47802000	17	NaN	7.90027	Q8C443;A2AQC8;B5B2R5;Q60591-4;Q60591-2;Q60591	17;218;238;238;238;238	Q8C443	Q8C443	Nuclear factor of activated T-cells, cytoplasmic 2	Nfatc2	SPRTSLAEDSCLGRHSPVPRPASRSSSPGAK	DSCLGRHsPVPRPAs
	-0.241902	S	2		___1	Cdc2 kinase substrate motif;CDK kinase substrate motif;CDK1,2,4,6 kinase substrate motif;ERK1,2 kinase substrate motif;G protein-coupled receptor kinase 1 substrate motif;GSK3 kinase substrate motif;GSK-3, ERK1, ERK2, CDK5 substrate motif;WW domain binding motif	+	HTP							0.915889	7.03703e-05	89.859	68.91	89.859	0.39842	7.5956	16343000	23066000	1789	NaN	7.5956	Q69ZK6;G3UZM1;G3UZX8	1789;1970;84	Q69ZK6	Q69ZK6	Probable JmjC domain-containing histone demethylation protein 2C	Jmjd1c	SNKTSVSLPESQQQNSPQKSQTNGNSSPGSA	PESQQQNsPQKSQTN
	-0.241509	S	2		___1	ERK1,2 kinase substrate motif;GSK-3, ERK1, ERK2, CDK5 substrate motif;PKA kinase substrate motif;PKC kinase substrate motif;WW domain binding motif	+	CST;HTP							1	0.050757	60.294	32.04	53.775	0.16916	8.30831	85242000	118140000	495	NaN	8.30831	P58742	495	P58742	P58742	Aladin	Aaas	THIPLYFVNAQFPRFSPVLGRAQEPPAGGGG	NAQFPRFsPVLGRAQ
	-0.239311	S	2		___1	Casein kinase II substrate motif;G protein-coupled receptor kinase 1 substrate motif;MAPKAPK2 kinase substrate motif									0.999948	1.48429e-41	165.66	165.66	127.66	0.79424	8.75951	178340000	396450000	290	NaN	8.75951	Q3UJB0	290	Q3UJB0	Q3UJB0		Sf3b2	EEEEMETDTRSSLGQSASETEEDTVSISKKE
	-0.239174	S	3		___1	Casein kinase I substrate motif;Casein kinase II substrate motif;G protein-coupled receptor kinase 1 substrate motif	+	CST;HTP							1	2.98041e-88	208.28	197.91	49.825	-0.51086	8.89297	303880000	477690000	120	NaN	8.89297	Q8JZQ9	120	Q8JZQ9	Q8JZQ9	Eukaryotic translation initiation factor 3 subunit B	Eif3b	QARGHPSAGAEEEGGSDGSAAEAEPRALENG	GAEEEGGsDGsAAEA
	-0.238885	S	2		___1	b-Adrenergic Receptor kinase substrate motif;BARD1 BRCT domain binding motif;Casein kinase II substrate motif;G protein-coupled receptor kinase 1 substrate motif	+	HTP							1	1.91114e-252	335.2	335.2	145.25	0.0081756	9.53039	1322100000	2069400000	429	NaN	9.53039	Q9DBX5;P47713	429;437	Q9DBX5	Q9DBX5	Cytosolic phospholipase A2;Phospholipase A2;Lysophospholipase	Pla2g4a	ENITAKHIVSNDSSDSDDEAQGPKGTENEEA	VsNDssDsDDEAQGP
	-0.238868	S	2		___1	14-3-3 domain binding motif;b-Adrenergic Receptor kinase substrate motif;Calmodulin-dependent protein kinase II substrate motif;Casein kinase II substrate motif;MAPKAPK1 kinase substrate motif;p70 Ribosomal S6 kinase substrate motif;Phosphorylase kinase substrate motif;PKA kinase substrate motif;PKC kinase substrate motif	+	HTP							1	0.00202133	73.9	53.87	44.614	0.62135	8.0393	44121000	65351000	160	NaN	8.0393	Q66JV4-2;Q66JV4;Q80YR9	160;376;376	Q66JV4-2	Q66JV4-2	RNA-binding protein 12B-B;RNA-binding protein 12B-A	Rbm12b2;Rbm12b1	EMVRIIECYEKKRPESLEKERPGRVSQKYSQ	YEKKRPEsLEKERPG
	-0.238391	S	3		___1	14-3-3 domain binding motif;Calmodulin-dependent protein kinase II substrate motif;Calmodulin-dependent protein kinase IV substrate motif;Cdc2 kinase substrate motif;CDK kinase substrate motif;CDK1,2,4,6 kinase substrate motif;Chk1 kinase substrate motif;ERK1,2 kinase substrate motif;Growth associated histone HI kinase substrate motif;GSK-3, ERK1, ERK2, CDK5 substrate motif;MDC1 BRCT domain bindi…	+	CST							0.999722	9.6922e-11	119.62	112.3	119.62	0.19437	8.43057	87111000	182400000	648	NaN	8.43057	E9QAN2;Q61183;F6VTN8;Q61183-4;Q61183-3;E9PWC8;E9PZR3;F7AB38	648;648;337;566;590;648;648;57	E9QAN2	E9QAN2	Poly(A) polymerase alpha	Papola	ATKVPNPIVGVKRTSSPNKEESPKKTKTEED	VGVkRTSsPNKEEsP
	-0.237337	S	2		___1	14-3-3 domain binding motif;Calmodulin-dependent protein kinase II substrate motif;Casein kinase II substrate motif;ERK1,2 kinase substrate motif;G protein-coupled receptor kinase 1 substrate motif;Growth associated histone HI kinase substrate motif;GSK3 kinase substrate motif;GSK-3, ERK1, ERK2, CDK5 substrate motif;MAPKAPK1 kinase substrate motif;PAK2 kinase substrate motif;Pim1 kinase substrate…	+	CST;HTP							1	2.00106e-30	160.48	160.48	87.352	0.41624	8.93003	322090000	529100000	1683	NaN	8.93003	Q8BTI8;Q8BTI8-2;Q8BTI8-3	1683;1587;1683	Q8BTI8	Q8BTI8	Serine/arginine repetitive matrix protein 2	Srrm2	SSPEIRSRTPPRRRRSPSVSSPEPTEKSRSS	TPPRRRRsPsVssPE
	-0.237149	S	3		___1	b-Adrenergic Receptor kinase substrate motif;BARD1 BRCT domain binding motif;Casein kinase II substrate motif	+	HTP							1	3.02992e-55	163.08	161.46	110.89	-0.0021344	8.38689	95708000	148010000	799	NaN	8.38689	Q569Z5-2;F8WHR6;Q569Z5	799;800;804	Q569Z5-2	Q569Z5-2	Probable ATP-dependent RNA helicase DDX46	Ddx46	NERKKLQKAALGLQDSDDEDAAVDIDEQIES	AALGLQDsDDEDAAV
	-0.237081	S	3		___3	ERK1,2 kinase substrate motif;G protein-coupled receptor kinase 1 substrate motif;GSK3 kinase substrate motif;GSK-3, ERK1, ERK2, CDK5 substrate motif;PKA kinase substrate motif;WW domain binding motif	+	CST;HTP							0.999997	7.05241e-08	87.61	83.224	87.61	0.045451	7.80611	24643000	39347000	116	NaN	7.80611	Q3UZA1;Q3UZA1-2	116;86	Q3UZA1;Q3UZA1-2	Q3UZA1	CapZ-interacting protein	Rcsd1	LPGASPKSPGLKAIVSPFHSPPSTPSSPGIR	PGLKAIVsPFHsPPs
	-0.237081	S	3		___3	Casein kinase II substrate motif;ERK1,2 kinase substrate motif;G protein-coupled receptor kinase 1 substrate motif;GSK-3, ERK1, ERK2, CDK5 substrate motif;MAPKAPK2 kinase substrate motif;WW domain binding motif	+	CST;HTP							0.998525	7.05241e-08	87.61	83.224	87.61	0.045451	7.80611	24643000	39347000	120	NaN	7.80611	Q3UZA1;Q3UZA1-2	120;90	Q3UZA1;Q3UZA1-2	Q3UZA1	CapZ-interacting protein	Rcsd1	SPKSPGLKAIVSPFHSPPSTPSSPGIRSHPS	AIVsPFHsPPstPss
	-0.236113	T	3		___1	b-Adrenergic Receptor kinase substrate motif;Calmodulin-dependent protein kinase II substrate motif;Casein kinase II substrate motif;G protein-coupled receptor kinase 1 substrate motif;PKA kinase substrate motif;PKC kinase substrate motif	+	CST;HTP							1	3.8403e-179	283.19	279.16	164.83	-0.41828	9.44314	917740000	1856400000	890	NaN	9.44314	E9PUK6;A2A8V9;Q52KI8;A2A8V8	890;885;913;876	E9PUK6	E9PUK6	Serine/arginine repetitive matrix protein 1	Srrm1	SAQEEPAAAPEPRKETESEAEDDNLDDLERH	APEPRKEtEsEAEDD
[truncated: 2,460 more rows]

## Sheet: pYome
Regulation	Ratio H/L normalized pY (Log2)	Amino acid	Charge	Diagnostic peak	Multiplicity	Motifs	Known site	Origin	Regulatory site	Regulatory site function	Regulatory site process	Regulatory site protInteract	Regulatory site otherInteract	Regulatory site notes	Localization prob	PEP	Score	Delta score	Score for localization	Mass error [ppm]	Intensity (Log10)	Intensity L	Intensity H	Position	Intensity pY	Intensity GP	Proteins	Positions within proteins	Leading proteins	Protein	Protein names	Gene names	Sequence window	PhosphoSitePlus window	PhosphoSitePlus kinase
[truncated: 584 more rows]

[truncated: 1 more sheets: Proteome]
