# Supplementary material for: Hoxa9 and Meis1 Cooperatively Induce Addiction to Syk Signaling by Suppressing miR-146a in Acute Myeloid Leukemia
Source: Cancer Cell. 2017 Apr 10;31(4):549–562.e11. doi: 10.1016/j.ccell.2017.03.001 (PMC5389883; doi:10.1016/j.ccell.2017.03.001)
Supplement: Table S2. Molecular Characteristics of the AML Patient Cohort, Related to Figures 1, 2, and 5 [file mmc3.xlsx]

## Sheet: Tabelle1
Sex	Age at diagnosis	% BM blasts at diagnosis	WBC/nl at diagnosis	FAB subtype	Karyotype	FLT3 status (allelic ratio)	inv(16)	t(8;21)	NPM mutation	PML-RARA	CEBP alpha	MLL rearrangement	Hoxa9-only high	Hoxa9/Meis1 high
m	74	45	101	M4	46,XY	wt	negative	negative	negative	negative	negative	negative	-	+
f	46	46	51	not available	46,XX	wt	negative	negative	negative	negative	negative	negative	-	+
m	55	82	3.28	not available	46,XY	wt	negative	negative	positive	negative	negative	negative	-	+
m	61	71	52	M2	46,XY	wt	negative	negative	positive	negative	negative	negative	-	+
m	60	53	1.9	not available	47,XY,der(7)t(7;11)(q21;q14)	ITD	negative	negative	not available	negative	negative	positive	-	+
f	52	39	68	M2	46,XX	wt	negative	negative	not available	negative	positive	negative	-	+
m	18	80	28	M4	46, XY, t(9;11)(p22;q23)(20)	wt	negative	negative	negative	negative	negative	positive	-	+
m	62	40	50	M4	Complex aberrant	wt	negative	negative	not available	negative	negative	positive	-	+
f	44	66	5	M2	Complex aberrant	wt	negative	negative	negative	negative	negative	positive	-	+
m	69	50	250	M5b	46,XY,del(7)(q21q35),del(11)(q14q24),dup(12)(q14q21)	wt	negative	negative	negative	negative	negative	positive	-	+
f	79	36	11	not available	46,XX,t(2;4)(p12;q35),t(8;21)(q22;q22)	wt	negative	positive	negative	negative	negative	negative	-	+
f	75	38	not available	not available	Complex aberrant	wt	negative	negative	negative	negative	negative	positive	-	+
m	53	65	1.5	M2	46,XY	wt	negative	negative	positive	negative	negative	negative	-	+
m	68	48	1.3	M3	46,XY,t(15;17)(q22;q12)	wt	negative	negative	not available	positive	negative	negative	-	+
m	75	30	4.5	M4	Complex aberrant	wt	negative	negative	negative	negative	negative	positive	-	+
m	84	50	1.8	not available	46,XY	wt	negative	negative	negative	negative	negative	positive (MLL-PTD)	-	+
m	70	25	5.62	not available	Complex aberrant	wt	negative	negative	negative	negative	negative	negative	-	+
m	56	40	3.72	not available	92,XXYY, t(8;13)(p11;q12)x2	wt	negative	negative	negative	negative	negative	negative	-	+
f	86	20	4.59	not available	Complex aberrant	wt	negative	negative	negative	negative	negative	positive	-	+
not available	not available	not available	not available	M3	not available	not available	not available	not available	not available	not available	not available	not available	-	+
not available	not available	not available	not available	M4	not available	not available	not available	not available	not available	not available	not available	not available	-	+
not available	not available	not available	not available	M3	not available	not available	not available	not available	not available	not available	not available	not available	-	+
not available	not available	not available	not available	M4	not available	not available	not available	not available	not available	not available	not available	not available	-	+
f	20	90	not available	M5	46, XX	wt	not available	not available	not available	not available	not available	not available	-	+
f	21	40	not available	M4	not available	wt	not available	not available	not available	not available	not available	positive	-	+
f	68	35	not available	M4	46, XX	wt	not available	not available	not available	not available	not available	positive (MLL-PTD)	-	+
m	73	40	not available	M4	46,XY	wt	not available	not available	not available	not available	not available	positive (MLL-PTD)	-	+
m	73	90	not available	M4	46,XY	wt	not available	not available	not available	not available	not available	negative	-	+
f	69	87	128	M4	47,XX,+8	ITD (0,8)	negative	negative	negative	negative	negative	positive (MLL-PTD)	+	-
f	60	55	9	M2	47,XX +11	wt	negative	negative	not available	negative	negative	positive (MLL-PTD)	+	-
f	65	80	32	M4	46,XX	TKD	negative	negative	positive	negative	negative	negative	+	-
m	65	30	83	M5b	46,XY	wt	negative	negative	negative	negative	negative	negative	+	-
f	28	66	6.3	M4	46,XX	TKD	negative	negative	negative	negative	negative	negative	+	-
m	57	45	1.41	not available	47,XY+1 der(1;7)(q10;p10),+8	wt	negative	negative	negative	negative	negative	negative	+	-
m	22	38	2.53	not available	45,XY,t(8;21)(q22;q22),del(9)(q13q34)	wt	negative	positive	negative	negative	negative	negative	+	-
m	63	70	8.76	M1	46,XY	ITD (0,1)	negative	negative	negative	negative	negative	negative	+	-
m	70	41	10	M4	46,XY,der(3)inv(3)(p22q25)	TKD	negative	negative	positive	negative	negative	negative	+	-
m	68	75	1.5	M1	46,XY	wt	negative	negative	not available	negative	negative	positive	+	-
f	59	70	0.45	M1	Complex aberrant	wt	negative	negative	negative	negative	negative	negative	+	-
f	78	40	30	M2	48,XX,13+,13+	wt	negative	negative	negative	negative	negative	not available	+	-
f	38	62	84	M4	46,XX	wt	negative	negative	positive	negative	negative	negative	+	-
m	75	78	10	not available	Complex aberrant	wt	negative	negative	negative	negative	negative	negative	+	-
m	72	25	43	not available	46,XY	wt	negative	negative	positive	negative	negative	negative	+	-
not available	not available	not available	not available	M4	not available	not available	not available	not available	not available	not available	not available	not available	+	-
not available	not available	not available	not available	M4	not available	not available	not available	not available	not available	not available	not available	not available	+	-
not available	not available	not available	not available	M2	not available	not available	not available	not available	not available	not available	not available	not available	+	-
not available	not available	not available	not available	M4	not available	not available	not available	not available	not available	not available	not available	not available	+	-
not available	not available	not available	not available	M4	not available	not available	not available	not available	not available	not available	not available	not available	+	-
m	65	75	<20	M4	46,XY	wt	not available	not available	positive	not available	negative	negative	+	-
f	62	61	64	M4	46,XX	TKD	negative	negative	positive	negative	negative	negative	-	-
m	43	31	9	not available	46,XY	wt	negative	negative	negative	negative	negative	negative	-	-
m	39	59	25	M4Eo	46,XY, inv16(p13q22)	wt	positive	negative	negative	negative	negative	negative	-	-
f	34	22	38	M4	46,XX	wt	negative	negative	not available	negative	negative	negative	-	-
f	77	30	82	not available	46,XX	wt	negative	negative	positive	negative	negative	negative	-	-
f	21	50	17	not available	46,XX,t(8;21)(q22;q22)	wt	negative	positive	negative	negative	negative	negative	-	-
f	44	60	43	not available	46,XX,inv(16)(p13q22)	wt	positive	negative	negative	negative	negative	negative	-	-
f	22	60	21	M4	46 XX, t(9;22)(q34;q11)	wt	negative	negative	negative	negative	negative	negative	-	-
f	41	51	1.21	M4	46,XX Monosomy 7, Trisomy 8, Trisomy 11	wt	negative	negative	negative	negative	negative	negative	-	-
f	37	50	1.55	not available	46,XX	ITD (0.6)	negative	negative	negative	negative	negative	negative	-	-
f	40	30	45	M4	46,XX,inv(3)(q21q26)	wt	negative	negative	negative	negative	negative	negative	-	-
m	53	65	230	M4Eo	46, XY, inv(16)(p13q22)	wt	positive	negative	negative	negative	negative	negative	-	-
m	27	32	119	M4	46,XY,t(1;22)(q21;q13),t(9;22)(q34;q11)	wt	negative	negative	not available	negative	negative	negative	-	-
m	52	66	175	M4	46,XY	ITD	negative	negative	negative	negative	negative	negative	-	-
f	61	50	13	M4	46,XX	wt	negative	negative	positive	negative	negative	negative	-	-
f	50	64	311	M4	46,XX	wt	negative	negative	positive	negative	negative	negative	-	-
m	47	90	205	M5b	46,XY	ITD (0.78)	negative	negative	positive	negative	negative	negative	-	-
f	58	90	183	M1	46,XX	ITD (0.2)	negative	negative	positive	negative	negative	negative	-	-
m	57	30	2.7	M2	45,X,-Y,t(8;21)(q22;q22)	wt	negative	positive	negative	negative	negative	negative	-	-
m	68	54	72	M5	47-48 XY, +4, +8, +13(cp14)	wt	negative	negative	negative	negative	negative	negative	-	-
m	68	10	3.21	not available	46,XY	wt	negative	negative	negative	negative	negative	negative	-	-
m	58	30	63	M4	46,XY	ITD	negative	negative	negative	negative	negative	negative	-	-
m	55	53	2.13	M2	46,XY	wt	negative	negative	positive	negative	negative	negative	-	-
m	70	62	39	not available	46,XY	wt	negative	negative	positive	negative	negative	negative	-	-
m	68	69	93	M1	46,XY	ITD (0.9)	negative	negative	negative	negative	negative	positive (MLL-PTD)	-	-
m	54	20	18	M5b	46,XY	wt	negative	negative	positive	negative	negative	negative	-	-
f	75	50	45	M2	46,XX	ITD (0.53)	negative	negative	positive	negative	negative	negative	-	-
m	38	80	9.8	M2	46,XY	wt	negative	negative	negative	negative	negative	negative	-	-
m	58	78	2.08	M1	46,XY	wt	negative	negative	positive	negative	negative	negative	-	-
f	35	90	0.61	M3	46,XX, t(15;17)	wt	negative	negative	negative	positive	negative	negative	-	-
m	77	25	25	M0	Complex aberrant	wt	negative	negative	negative	negative	negative	negative	-	-
m	83	15	3.5	not available	46,XY	wt	negative	negative	positive	negative	negative	negative	-	-
f	47	70	0.38	M0	48,XX,+4,+21	wt	negative	negative	negative	negative	negative	negative	-	-
m	77	70	1.5	M4	46,XY	ITD	negative	negative	positive	negative	negative	negative	-	-
f	85	81	192	M1	not available	wt	negative	negative	not available	negative	negative	not available	-	-
f	56	35	3.6	M5b	92,XXXX (5), 46,XX (20)	wt	negative	positive (FISH)	negative	negative	negative	negative	-	-
f	67	29	3.3	M2	47,XX,+4	wt	negative	negative	positive	negative	negative	negative	-	-
f	70	82	321	not available	48,XX,+8,+21	wt	negative	negative	negative	negative	negative	negative	-	-
f	78	60	165	M4	46,XX	wt	negative	negative	positive	negative	negative	negative	-	-
m	63	80	60	M5a	46,XY	wt	negative	negative	positive	negative	negative	negative	-	-
m	81	30	1.9	not available	not available	wt	negative	negative	not available	negative	negative	not available	-	-
m	52	65	28	not available	not available	wt	negative	negative	not available	negative	negative	not available	-	-
not available	not available	not available	not available	M2	not available	not available	not available	not available	not available	not available	not available	not available	-	-
not available	not available	not available	not available	M2	not available	not available	not available	not available	not available	not available	not available	not available	-	-
not available	not available	not available	not available	M6	not available	not available	not available	not available	not available	not available	not available	not available	-	-
not available	not available	not available	not available	M4	not available	not available	not available	not available	not available	not available	not available	not available	-	-
not available	not available	not available	not available	M2	not available	not available	not available	not available	not available	not available	not available	not available	-	-
not available	not available	not available	not available	M6	not available	not available	not available	not available	not available	not available	not available	not available	-	-
not available	not available	not available	not available	M2	not available	not available	not available	not available	not available	not available	not available	not available	-	-
not available	not available	not available	not available	M5	not available	not available	not available	not available	not available	not available	not available	not available	-	-
not available	not available	not available	not available	M4	not available	not available	not available	not available	not available	not available	not available	not available	-	-
not available	not available	not available	not available	M4	not available	not available	not available	not available	not available	not available	not available	not available	-	-
not available	not available	not available	not available	not available	not available	not available	not available	not available	not available	not available	not available	not available	-	-
not available	not available	not available	not available	M5	not available	not available	not available	not available	not available	not available	not available	not available	-	-
not available	not available	not available	not available	M1	not available	not available	not available	not available	not available	not available	not available	not available	-	-
not available	not available	not available	not available	M5	not available	not available	not available	not available	not available	not available	not available	not available	-	-
not available	not available	not available	not available	M5	not available	not available	not available	not available	not available	not available	not available	not available	-	-
not available	not available	not available	not available	M1	not available	not available	not available	not available	not available	not available	not available	not available	-	-
not available	not available	not available	not available	M2	not available	not available	not available	not available	not available	not available	not available	not available	-	-
not available	not available	not available	not available	M5	not available	not available	not available	not available	not available	not available	not available	not available	-	-
not available	not available	not available	not available	M1	not available	not available	not available	not available	not available	not available	not available	not available	-	-
not available	not available	not available	not available	M5	not available	not available	not available	not available	not available	not available	not available	not available	-	-
f	73	80	>20	M4	not available	wt	not available	not available	negative	not available	not available	negative	-	-
m	72	80	<20	M5	46, XY	ITD	not available	not available	positive	not available	not available	negative	-	-
m	70	70	<20	M4	not available	wt	not available	not available	negative	not available	not available	negative	-	-
f	64	80	<20	M2	46, XX	wt	not available	not available	positive	not available	not available	negative	-	-
